# Supplementary material for: Amidosquaramides – a new anion binding motif with pH sensitive anion transport properties
Source: Royal Society of Chemistry journal article supplement (doi:10.1039/d2ob01176j), 2022-01-01
Supplement: d2ob01176j1.pdf [file d2ob01176j1.pdf]

## Amidosquaramides – A new anion binding motif with pH sensitive anion transport properties

Luke A. Marchetti,<sup>a,b</sup> Tobias Krämer,<sup>a</sup> and Robert B. P. Elmes<sup>a,b</sup>

<sup>a</sup>*Department of Chemistry, Maynooth University, National University of Ireland, Maynooth, Co. Kildare, Ireland.*

Tel: +353 1 7084615; E-mail: [robert.elmes@mu.ie](mailto:robert.elmes@mu.ie)

<sup>b</sup>*Synthesis and Solid State Pharmaceutical Centre (SSPC), University of Limerick, Ireland.*

### Supporting Information

|   |                                                    | Page |
|---|----------------------------------------------------|------|
| 1 | Methods                                            | 1    |
| 2 | Spectroscopic Characterisation Data                | 6    |
| 3 | UV/Vis-Spectrometric pK <sub>a</sub> Determination | 78   |
| 4 | <sup>1</sup> H NMR Anion Binding Screen            | 94   |
| 5 | <sup>1</sup> H NMR Anion Binding and Fitting Data  | 96   |
| 6 | Geometry Optimisations                             | 116  |
| 7 | References                                         | 147  |

**<sup>1</sup>H NMR Anion Binding Studies:** Both the tetrabutylammonium salts and the receptors were lyophilised before use. Solutions of the TBA salts were made up in DMSO-*d*<sub>6</sub>, which was dried over 3Å molecular sieves before use, to a concentration of 300 mM. An aliquot of stock solution of receptor in DMSO-*d*<sub>6</sub> was diluted to 1 mL (2.5 mM). 600 µL of this solution was added to an NMR tube and the <sup>1</sup>H NMR spectrum was recorded. Subsequent additions of aliquots of TBA salt solutions were added to the NMR tube and shaken vigorously to ensure homogenisation. This process was repeated up to 22 equivalents of halide was reached.

The <sup>1</sup>H NMR spectra were analysed and processed, and stackplots were generated using MestReNova 6.0.2 software. A global fitting analysis assuming a 1:1 binding model was employed to provide the binding constant ( $K_a/M^{-1}$ ), by fitting of the chemical shift changes of the NH signals as function of anion concentration using the open access BindFit software program.<sup>1,2</sup>

**UV/Vis pH-spectrophotometric titrations:** pK<sub>a</sub> values were experimentally determined using the wavelength of maximum difference in absorbance between the UV/Vis spectra of the

neutral and anionic species. The absorbance of each receptor was measured in a solution of DMSO/H<sub>2</sub>O (9:1) containing 0.1 M TBAPF<sub>6</sub> between approximately pH 2.5 to 12.5. The solutions were initially acidified using HNO<sub>3</sub> and gradually basified by aliquots of either 1 M or 0.1 M NaOH. The absorbance values of maximal difference were plotted against pH values. A four parameter sigmoid curve using Sigma Plot was fitted through the data points with the point of inflexion corresponding to the pK<sub>a</sub> value.

### **Anion transport assays:**

The methods for the anion transport assays were adapted from methods previously reported by Gale *et al.*<sup>3</sup>

#### *Preparation of POPC vesicles*

The internal solution (NaCl 487 mM, sodium phosphate 5 mM) and external solution (NaNO<sub>3</sub> 487 mM, sodium phosphate 5 mM) were prepared using Milli-Q water to prevent ion contamination and buffered to pH 7.20. 1-palmitoyl-2-oleoyl-sn-glycero-3-phosphocholine (POPC) (118 mg) and cholesterol (26 mg) were dissolved in CHCl<sub>3</sub> (5 mL) in a 25 mL round-bottomed flask. The CHCl<sub>3</sub> was slowly gently removed using a rotary evaporator to form a thin lipid film, which was then dried under vacuum overnight. The lipid film was rehydrated by vortexing with 5 mL of the internal solution for 5 minutes before brief sonication to ensure no lipid was remaining on the interior wall of the flask. The lipid solution was subjected to nine freeze-thaw cycles by submerging the flask in liquid N<sub>2</sub> and lukewarm water, followed by allowing the solution to rest for 30 minutes. Every 1 mL of the lipid solution was then extruded 27 times through a 200 nm polycarbonate membrane to form unilamellar vesicles. The vesicles were then dialysed against the external solution overnight to remove unencapsulated NaCl. The vesicles were then diluted to 10 mL with the external solution to obtain a stock solution of lipid.

For preparation of POPC vesicles at pH 4.20, the procedure is largely the same. Internal and external solutions are buffered with a citrate buffer to pH 4.20 (5 mM) instead of sodium phosphate. The dialysis of the lipid vesicles to remove unencapsulated NaCl lasts for 2 hours, as opposed to overnight.

#### *Cl<sup>-</sup>/NO<sub>3</sub><sup>-</sup> exchange assays*

In a glass vial, an aliquot of the vesicle solution was diluted to 5 mL using the external solution to obtain a solution of 0.5 mM lipid. A micro PTFE stirring bar was added to the vial and set to

stir at a moderate rate. The chloride ion selective electrode (ISE) was calibrated against standard solution of NaCl before using the ISE to monitor Cl<sup>-</sup> efflux. The readings from the electrode reader were allowed to stabilise before initiating the experiment. A negative control using DMSO was added to the lipid solution as to ensure that the vesicles displayed no leakage. At t=0, a DMSO solution of the receptor was added to give a 5 mol % (concentration of the receptor with respect to the lipid) solution. The electrode reader was set to record the mV at 5 second intervals. At t=300, a solution of Triton X-100 (11 wt% in H<sub>2</sub>O:DMSO 7:1 v:v) was added to lyse the vesicles to determine 100% Cl<sup>-</sup> efflux. Experiments were each repeated in triplicate, and all traces are the average of three trials.

## **Computational methods:**

### *Geometry Optimisations*

All electronic structure calculations were carried out using the Gaussian 09 (revision E.01)<sup>4</sup> and ORCA (version 4.2.1) program packages.<sup>5</sup> Unconstrained optimizations of ground-state geometries and subsequent analytical frequency calculations were carried out at DFT level using the hybrid meta exchange-correlation M06-2X functional<sup>6</sup> in conjunction with Pople's 6-31+G(d) basis set on all atoms except iodine.<sup>7</sup> The Stuttgart-Dresden SDD effective core potential and associate basis sets were chosen to describe iodine,<sup>8</sup> with an added polarization function ( $\zeta_d = 0.289$ ).<sup>9</sup> An ultrafine integration grid, corresponding to a pruned grid of 99 radial shells and 590 angular points per shell, was used for all calculations. All stationary points were confirmed to be minima by the absence of imaginary modes in their vibrational spectra. Thermal and entropic corrections to the SCF energies ( $T = 298.15$  K and  $p = 1$  atm) were also extracted from the vibrational gas phase calculations. Effects due to the presence of solvent were included by means of a polarizable continuum model in the integral equation formalism variant (IEF-PCM),<sup>10</sup> with dielectric constant and related solvent parameters corresponding to those of dimethylsulfoxide ( $\epsilon = 46.8$ ). Non-electrostatic terms to solvation were calculated by invoking the SMD option.<sup>11</sup> To this end, all geometries were re-optimised in solution phase. The free energies of solvation (at fixed concentrations) for each compound were then obtained from the electronic energy difference of the species optimised in solution and gas phase:

$$\Delta G_{\text{solv}}^{\ominus} = E_{\text{SCRF}}(\mathbf{R}_s) - E_{\text{SCF}}(\mathbf{R}_g)$$

The “ $\ominus$ ” superscript indicates that the quantities are calculated with respect to standard states of 1 mol L<sup>-1</sup> (applying a correction of 1.9 kcal mol<sup>-1</sup>). The variables  $R_g$  and  $R_s$  imply dependence of the energy on the gas phase and solution phase optimized geometries, respectively. High-level gas phase calculations were carried out at the DLPNO-CCSD(T) level of theory<sup>12</sup> as implemented in ORCA, by means of single-point calculations on the DFT-optimised geometries. Automatic basis set extrapolation<sup>13</sup> (involving cardinal numbers  $n = 3$  and 4 within the def2- $n$ ZVP basis set family)<sup>14</sup> was used to converge both HF and correlation energies to the complete basis set limit. The RIJCOSX approximation was used to speed up integral solvation, in conjunction with the autoaux option to construct auxiliary basis sets for Coulomb, exchange and correlation calculations.<sup>15</sup>

#### Calculations of $pK_A$ values

All  $pK_a$  values were calculated following literature procedures<sup>16</sup> and using the direct method via the thermodynamic cycle depicted in Scheme S1. A proton solvation free energy of – 273.30 kcal mol<sup>-1</sup> in DMSO was employed.<sup>17</sup>

Scheme S1:

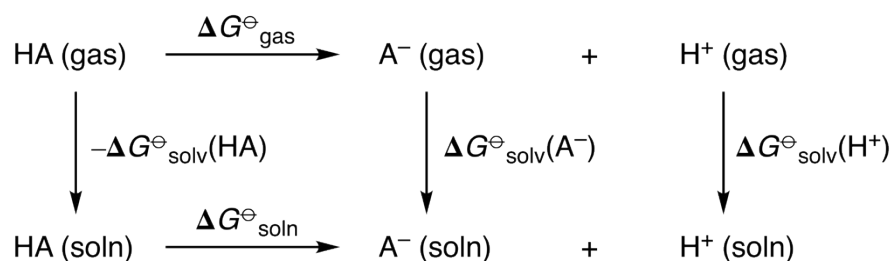

$$\Delta G^{\ominus}_{\text{soln}} = \Delta G^{\ominus}_{\text{gas}} + \Delta G^{\ominus}_{\text{solv}}(\text{H}^{+}) + \Delta G^{\ominus}_{\text{solv}}(\text{A}^{-}) - \Delta G^{\ominus}_{\text{solv}}(\text{HA})$$

$$pK_a(\text{HA}) = \Delta G^{\ominus}_{\text{soln}} / RT \ln(10)$$

### *Metadynamics Simulations*

After a preliminary minimization, receptor **1** was subjected to well-tempered metadynamics simulations,<sup>18</sup> utilizing the ABIN (version 1.1)<sup>19</sup> molecular dynamics software in conjunction with the PLUMED (version 2.6.0) plugin.<sup>20</sup> Forces and energies were obtained externally by interfacing to the xtb 6.1 code<sup>21</sup> (invoking the GBSA model for water solvent). These simulations employed a Nosé-Hoover<sup>22</sup> thermostat at a temperature of 298.15 K, using a time step of 20 au (~0.5 fs). For each system, two collective variables (CV1 and CV2) were defined as torsional angles (see Figure 3 in for definition). After a first trial phase where the simulation parameters were tuned properly, the Gaussian width for both CVs was set to 0.35 radians, spawned every 500 steps. A Gaussian height of 1.2 kJ mol<sup>-1</sup> and a bias factor of 6.0 was used in all cases. In order to sample the conformational space efficiently, 40 multiple walkers were run in parallel during the simulation. The deposited bias is shared along all replicas (disk-based sharing) so that the history-dependent potential depends on the full history. The free energy surfaces (FESs) were obtained from the combined bias potential from all trajectories as calculated with respect to the two CVs. General searches of the conformations space for all receptors utilised the automated crest routine as implemented in xtb 6.1.<sup>23</sup>

Spectroscopic Characterisation Data:

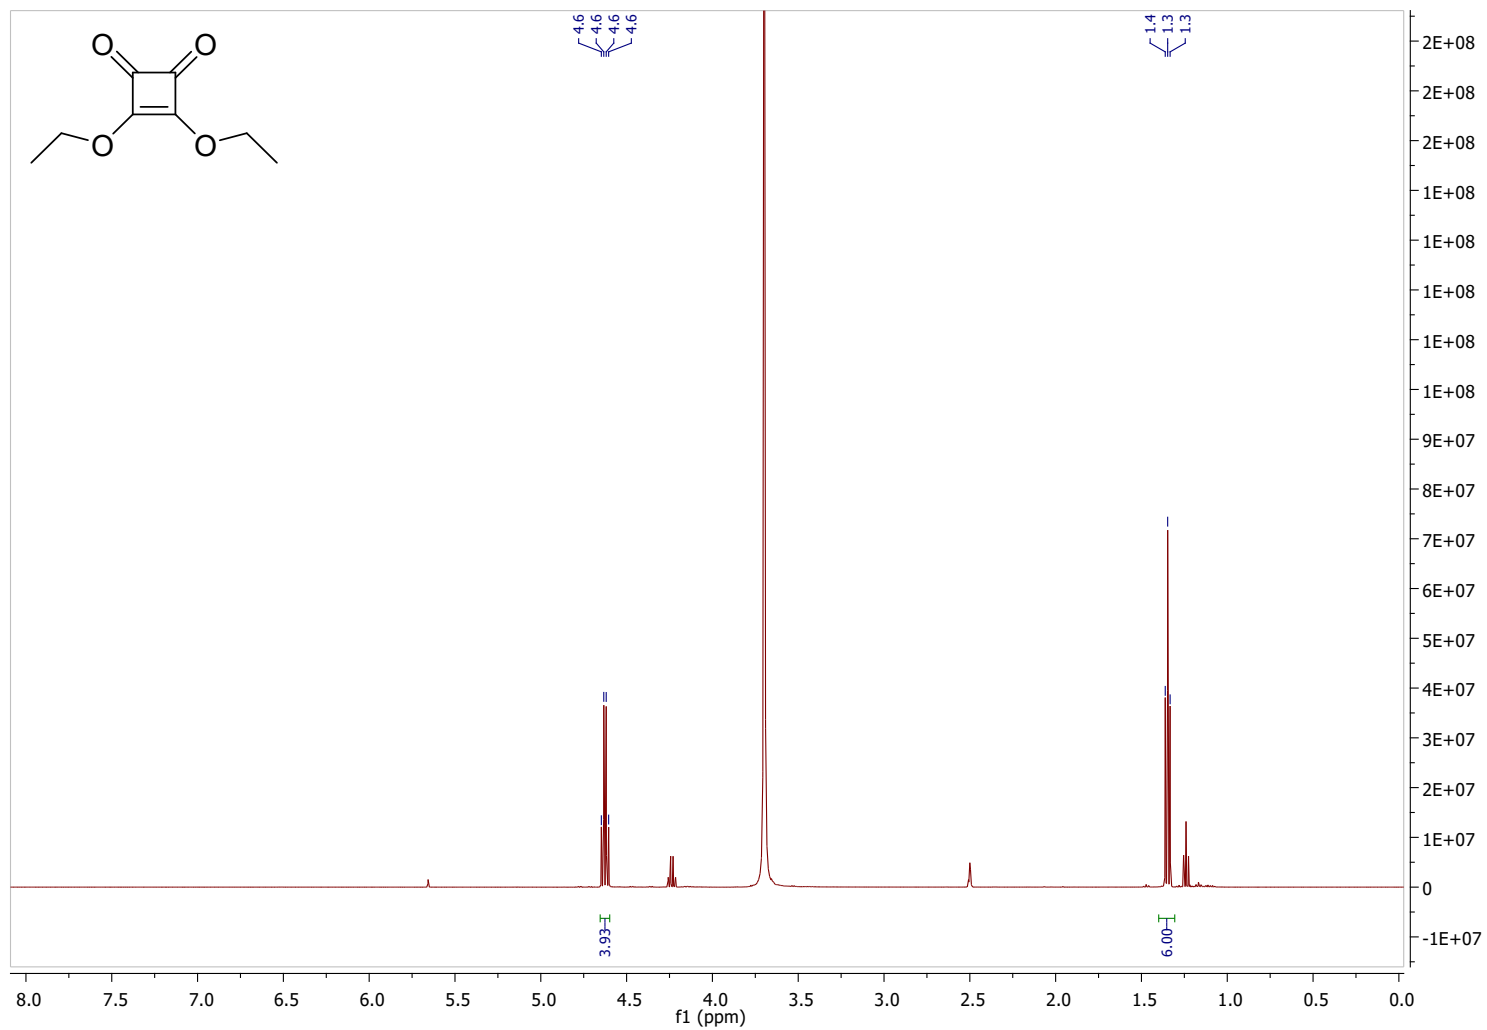

Figure S1. <sup>1</sup>H NMR (DMSO-d<sub>6</sub>, 500 MHz) spectrum of **1**.

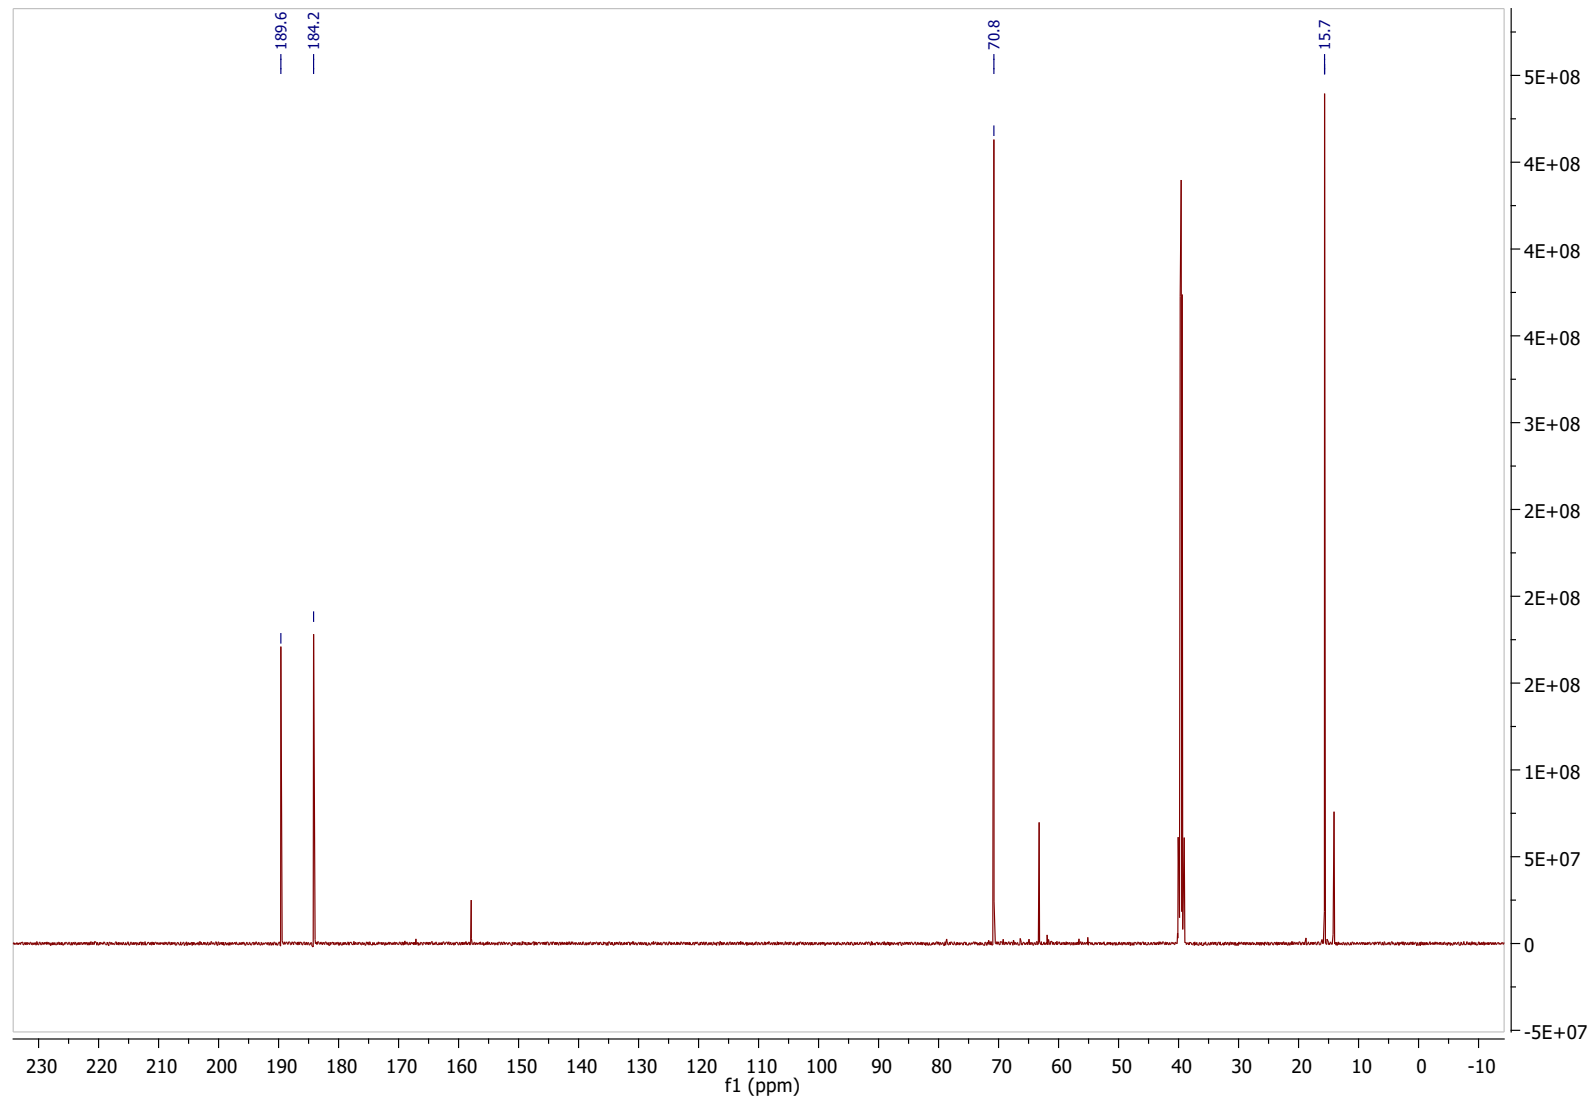

**Figure S2.**  $^{13}\text{C}$  NMR ( $\text{DMSO-}d_6$ , 500 MHz) spectrum of **9**.

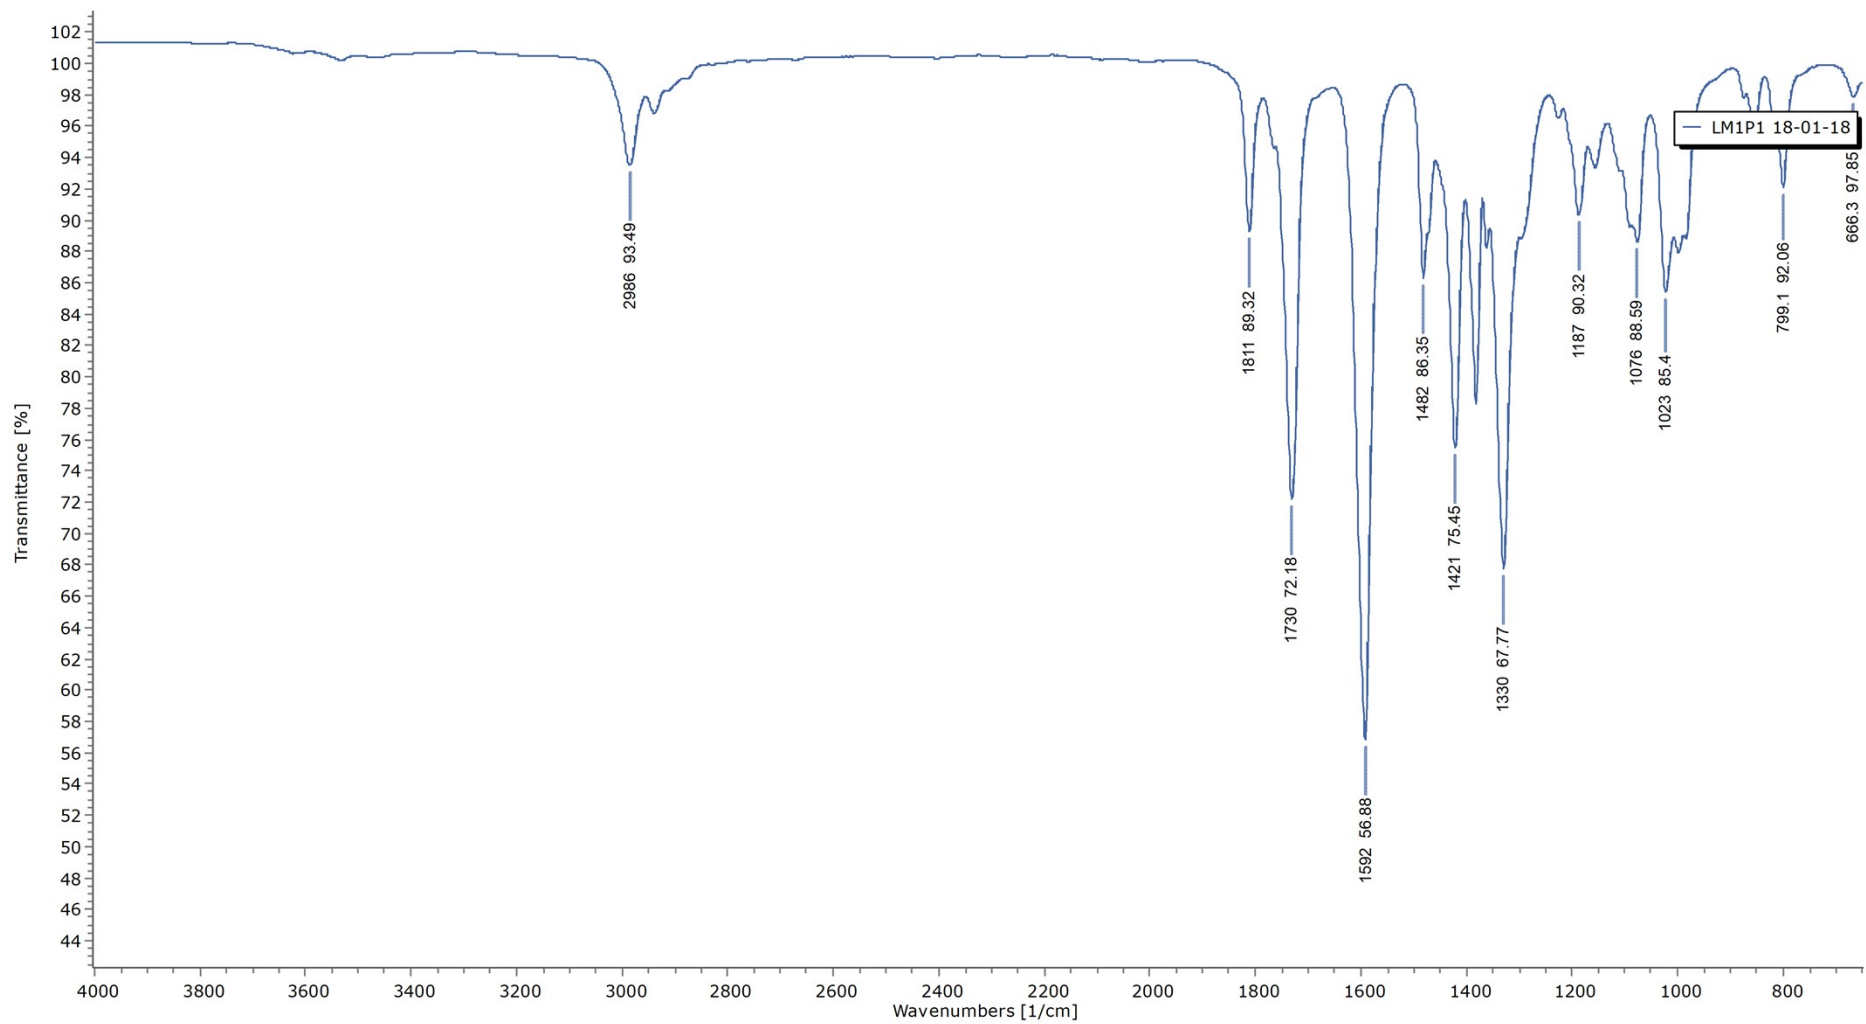

Figure S3. IR spectrum of 9.



+MS, 1.0-1.3min #(119-153), -Spectral Bkgrnd

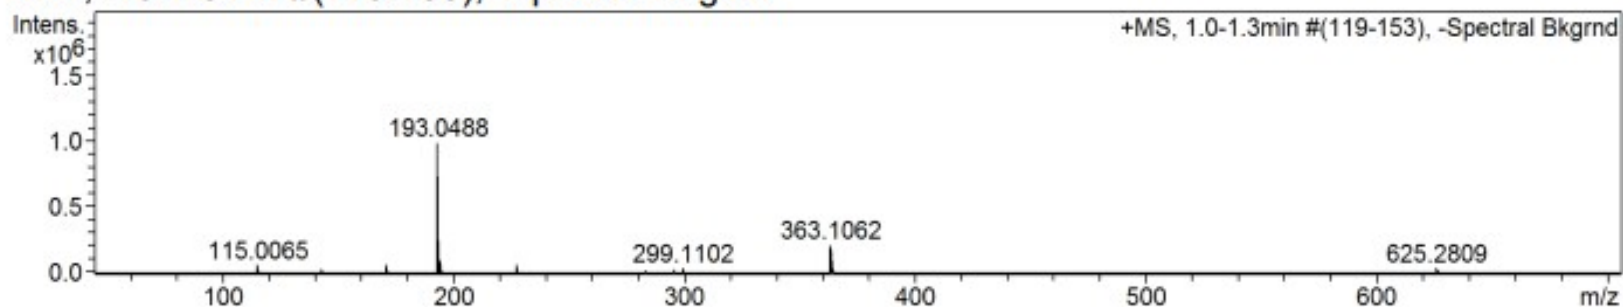

| #  | m/z      | I      | I %   | Area  | S/N     |
|----|----------|--------|-------|-------|---------|
| 1  | 115.0065 | 55950  | 5.7   | 1041  | 3998.3  |
| 2  | 171.0653 | 60124  | 6.1   | 1824  | 1852.8  |
| 3  | 193.0488 | 987338 | 100.0 | 39236 | 18352.4 |
| 4  | 194.0501 | 91896  | 9.3   | 3202  | 1677.7  |
| 5  | 227.0885 | 61454  | 6.2   | 2490  | 1909.0  |
| 6  | 295.1497 | 32601  | 3.3   | 1674  | 1013.4  |
| 7  | 299.1102 | 35754  | 3.6   | 1787  | 1150.1  |
| 8  | 363.1062 | 212150 | 21.5  | 13058 | 4895.7  |
| 9  | 364.1089 | 34991  | 3.5   | 2097  | 795.5   |
| 10 | 625.2809 | 36818  | 3.7   | 3708  | 3178.1  |

Generate Molecular Formula Parameters

| Charge   | Tolerance | SearchRadius | H/C Ratio min. | H/C Ratio max. | Electron Conf. | Nitrogen Rule | sigma limit |
|----------|-----------|--------------|----------------|----------------|----------------|---------------|-------------|
| positive | 50 ppm    | 0.05 m/z     | 0              | 3              | both           | true          | 0.05        |

Expected Formula C<sub>8</sub>H<sub>10</sub>O<sub>4</sub> Adduct(s): H, Na

| # | meas. m/z | theo. m/z | Err[ppm] | Sigma  | Formula                                                       |
|---|-----------|-----------|----------|--------|---------------------------------------------------------------|
| 1 | 171.0653  | 171.0652  | 0.70     | 0.0134 | C <sub>8</sub> H <sub>11</sub> O <sub>4</sub>                 |
| 1 | 193.0488  | 193.0471  | 8.80     | 0.0040 | C <sub>8</sub> H <sub>10</sub> Na <sub>1</sub> O <sub>4</sub> |

Note: Sigma fits < 0.05 indicates high probability of correct MF.

Figure S4. HRMS of 9.

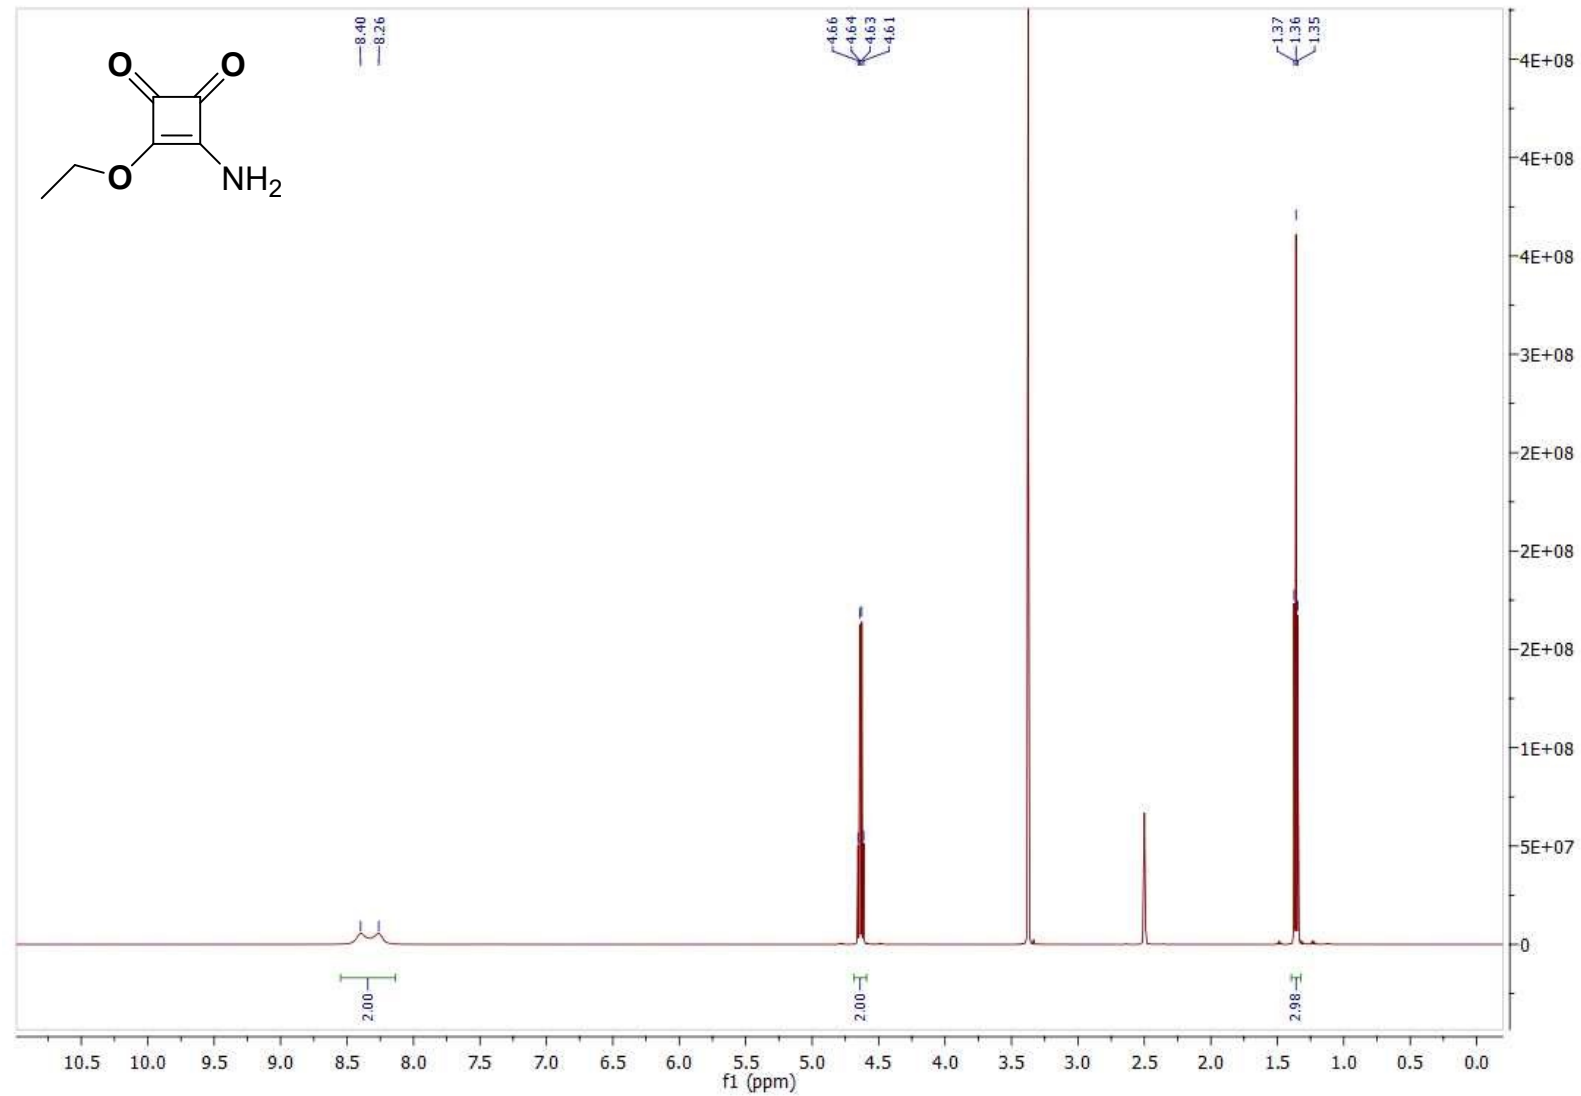

**Figure S5.**  $^1\text{H}$  NMR ( $\text{DMSO-}d_6$ , 500 MHz) spectrum of **10**.

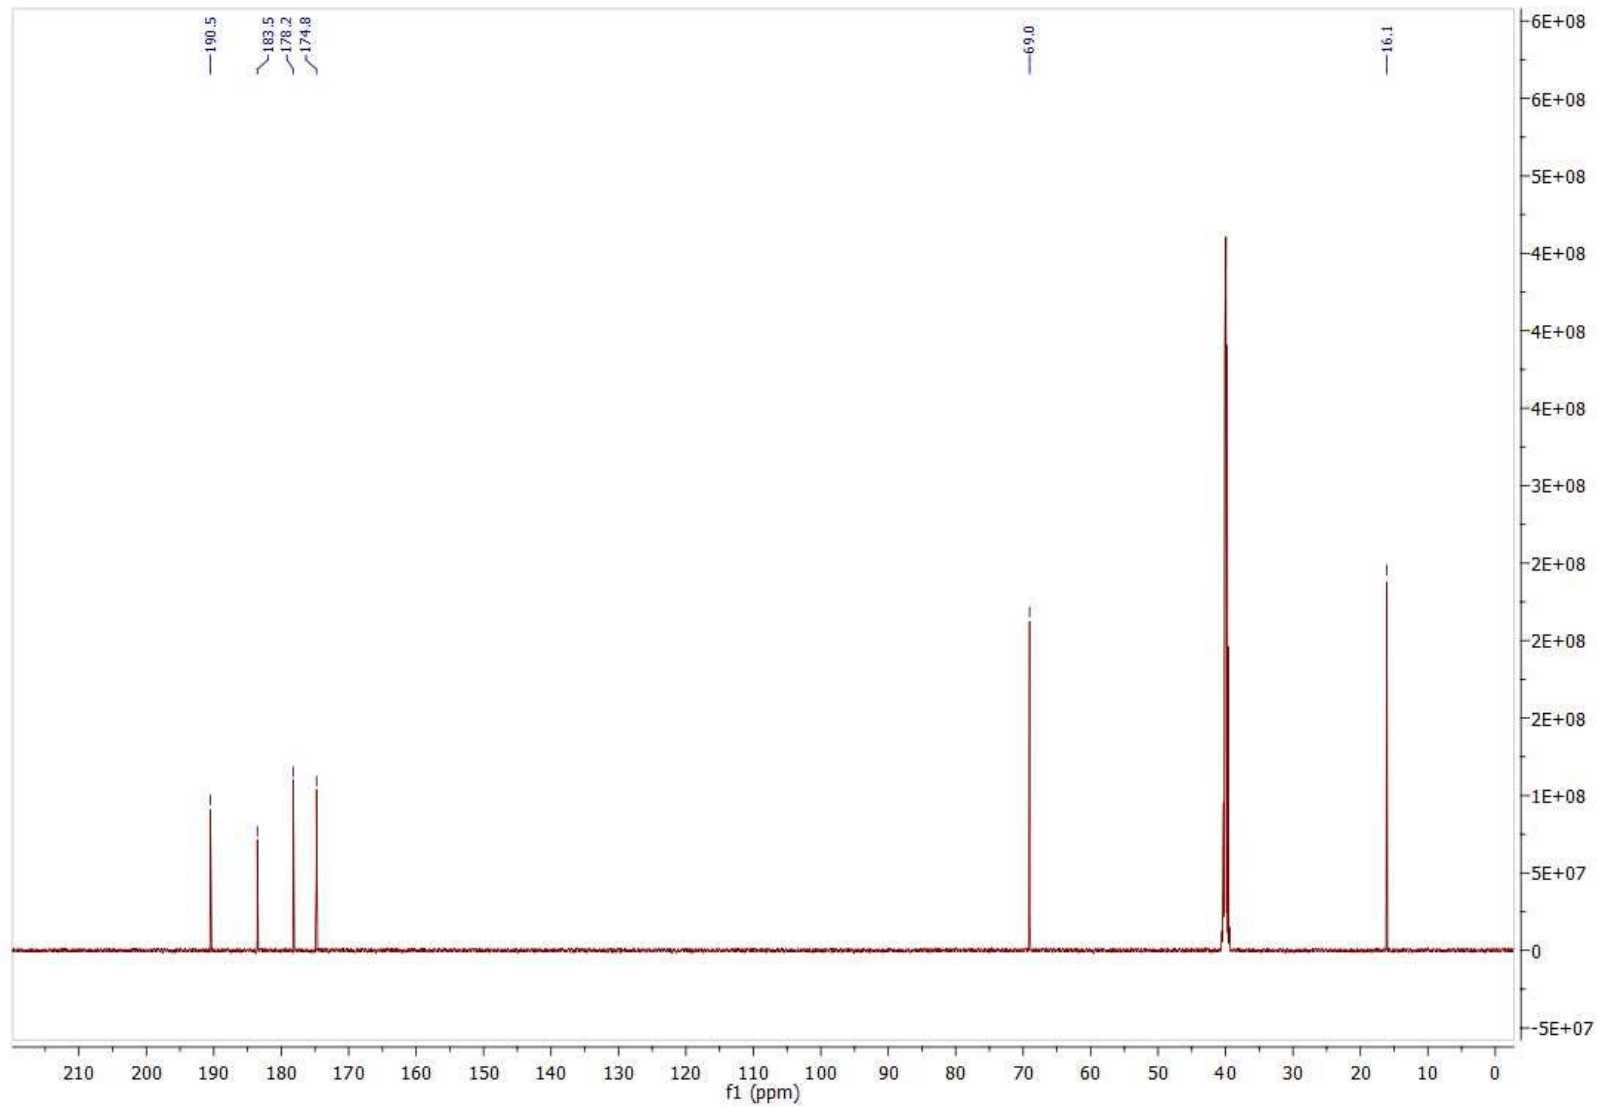

**Figure S6.**  $^{13}\text{C}$  NMR ( $\text{DMSO-}d_6$ , 126 MHz) spectrum of **10**.

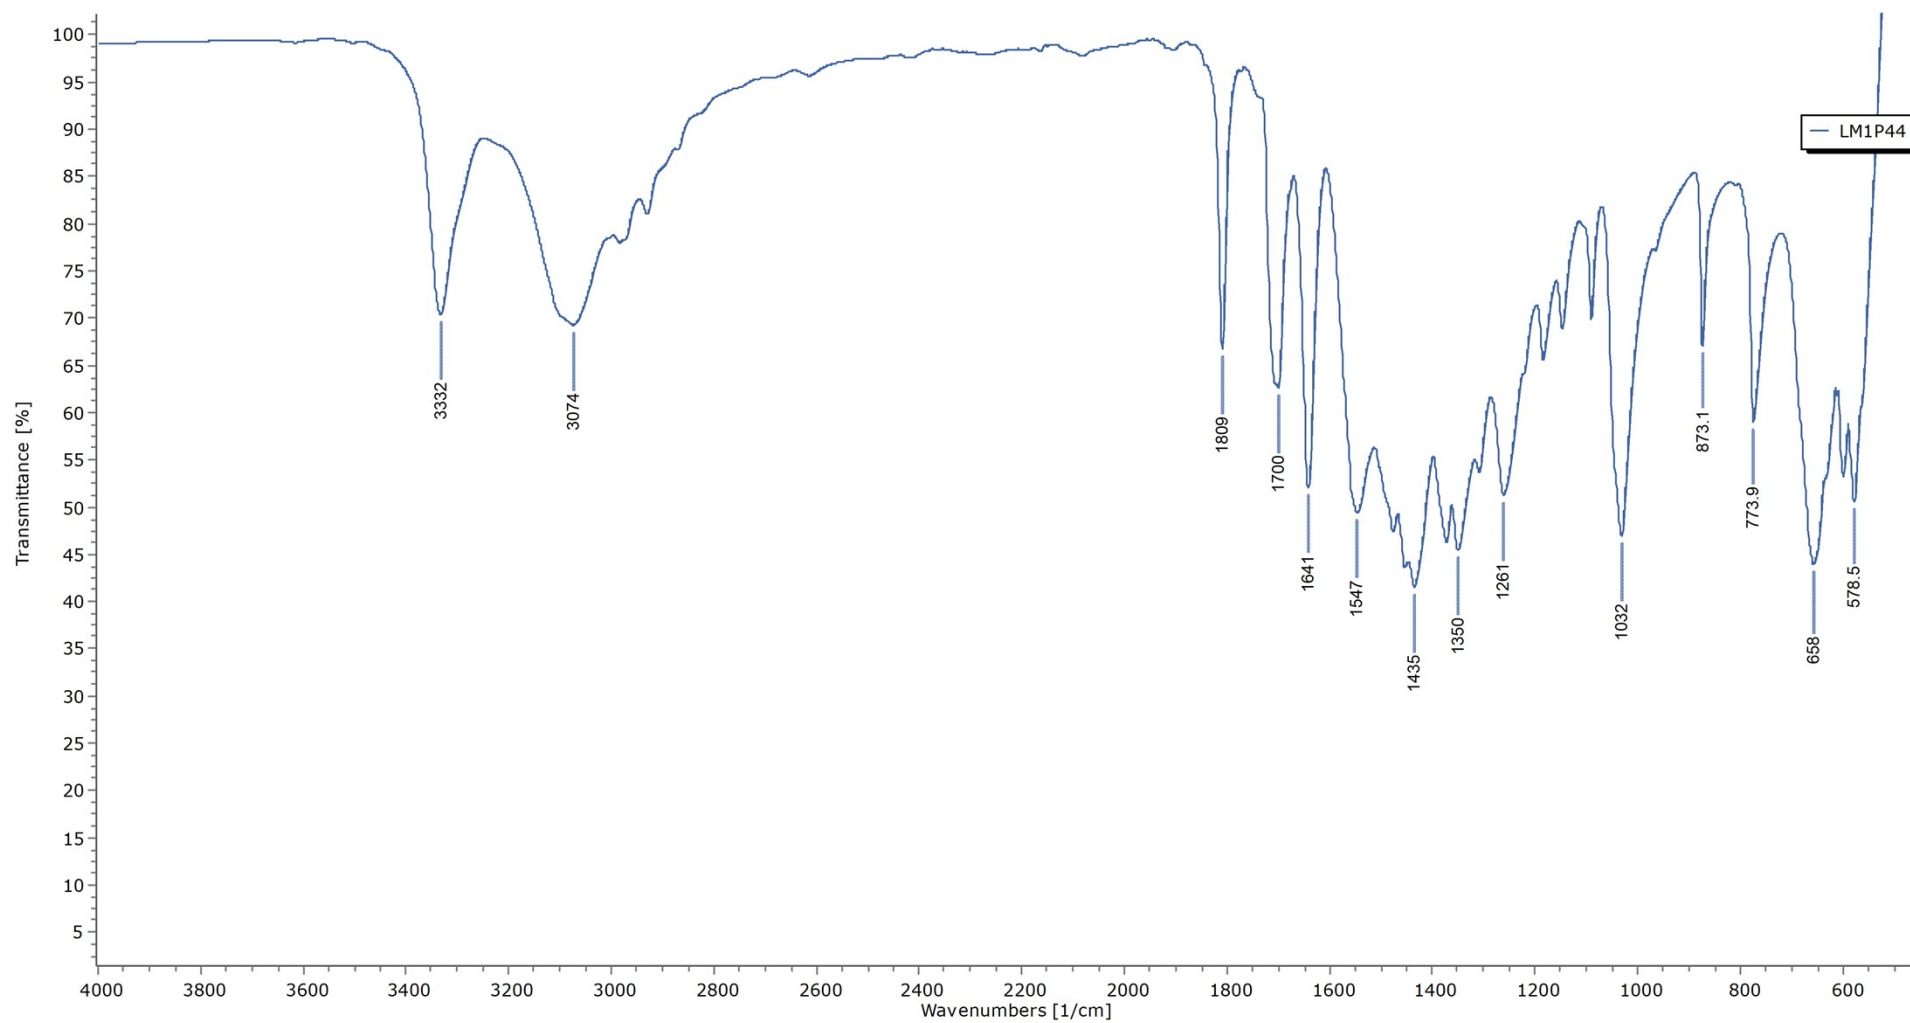

**Figure S7.** IR spectrum of **2.18**

## Compounds

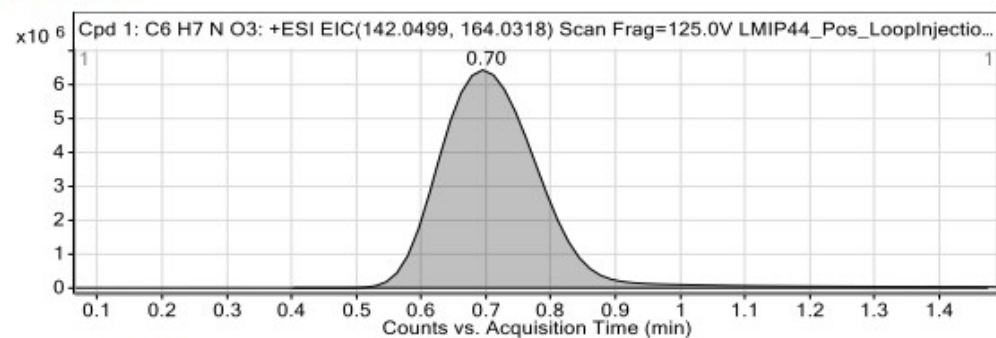

### Integration Peak List

| Start | RT  | End  | Height  | Area     |
|-------|-----|------|---------|----------|
| 0.4   | 0.7 | 1.47 | 6234920 | 68646404 |

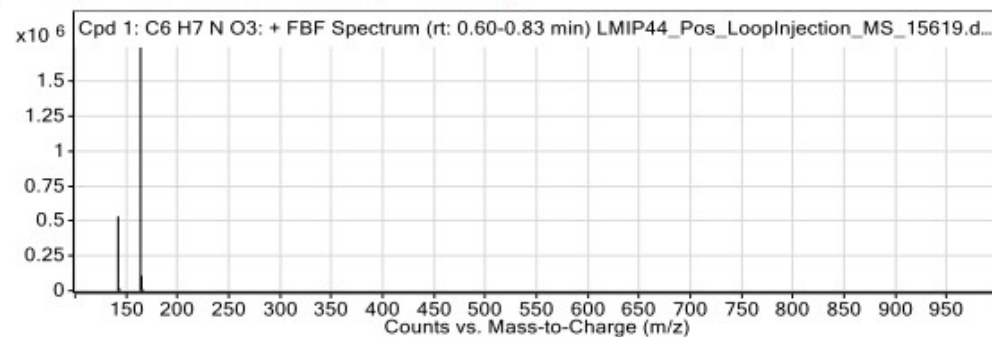

### Peak List

| m/z      | z | Abund     | Formula                                       | Ion                 |
|----------|---|-----------|-----------------------------------------------|---------------------|
| 142.0501 | 1 | 533324.88 | C <sub>6</sub> H <sub>7</sub> NO <sub>3</sub> | (M+H) <sup>+</sup>  |
| 143.0343 | 1 | 19225.4   | C <sub>6</sub> H <sub>7</sub> NO <sub>3</sub> | (M+H) <sup>+</sup>  |
| 144.033  | 1 | 2734.74   | C <sub>6</sub> H <sub>7</sub> NO <sub>3</sub> | (M+H) <sup>+</sup>  |
| 164.032  | 1 | 1746564   | C <sub>6</sub> H <sub>7</sub> NO <sub>3</sub> | (M+Na) <sup>+</sup> |
| 165.0353 | 1 | 107480.85 | C <sub>6</sub> H <sub>7</sub> NO <sub>3</sub> | (M+Na) <sup>+</sup> |
| 166.0368 | 1 | 12796.33  | C <sub>6</sub> H <sub>7</sub> NO <sub>3</sub> | (M+Na) <sup>+</sup> |

--- End Of Report ---

Figure S8. HRMS of 10.

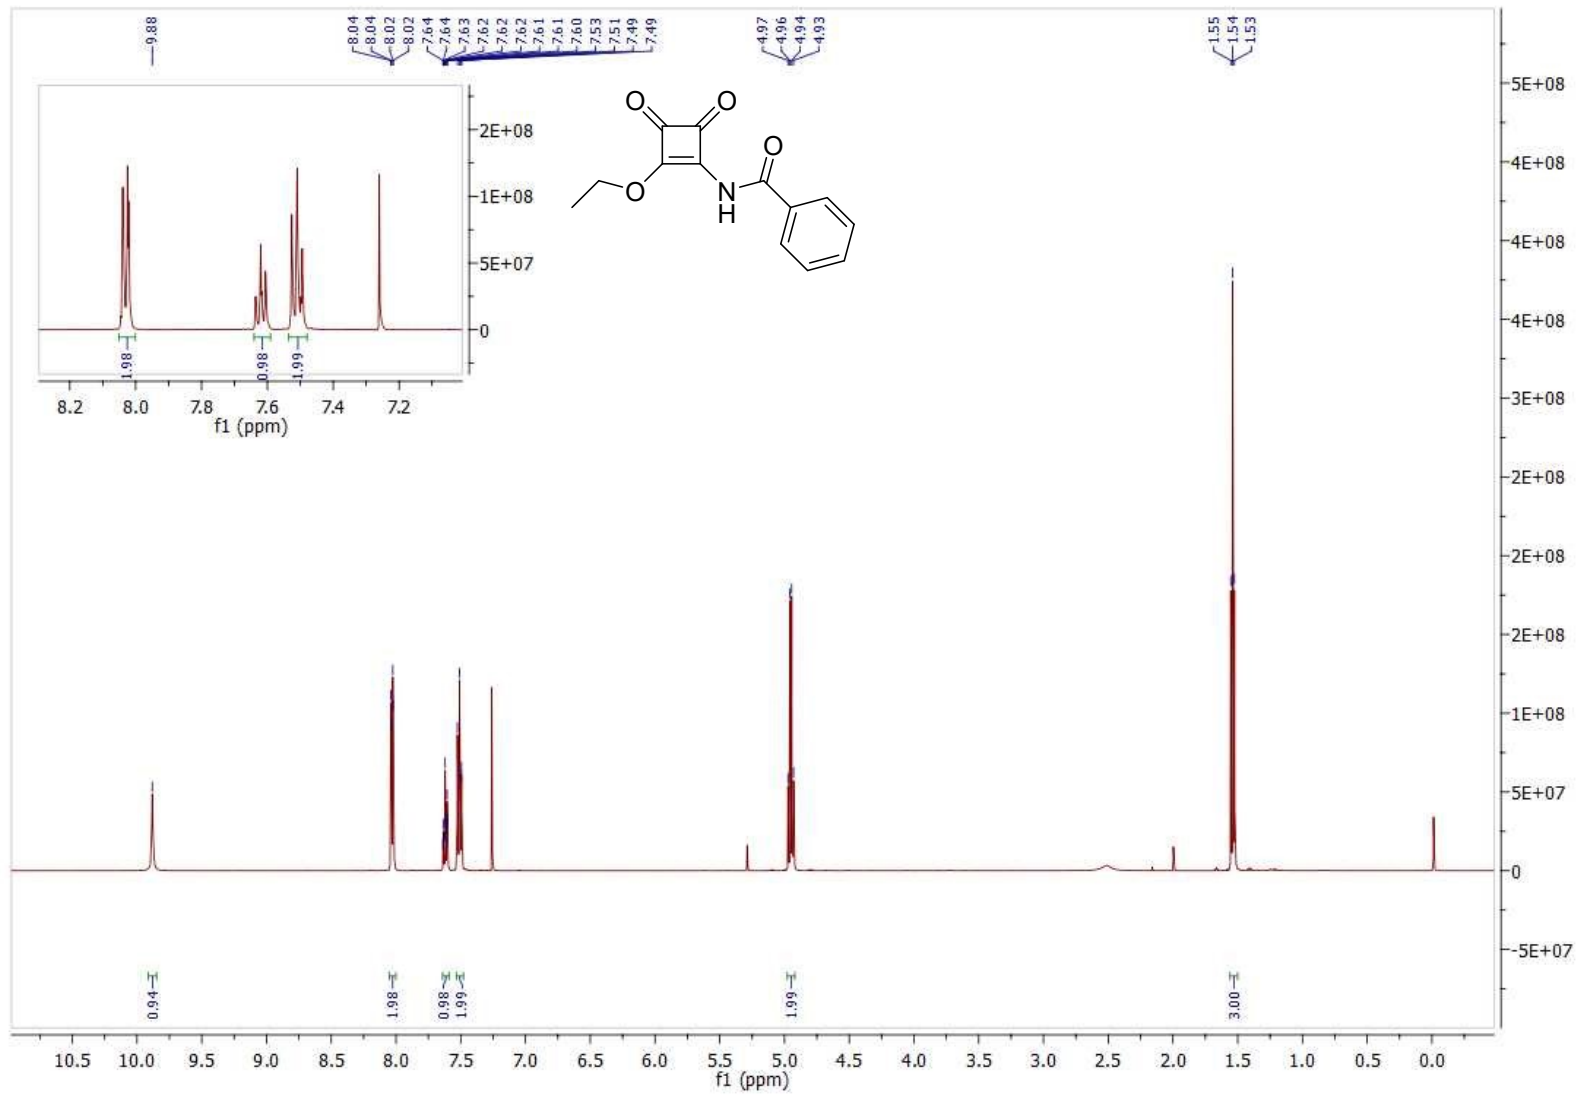

**Figure S9.** <sup>1</sup>H NMR (CDCl<sub>3</sub>, 500 MHz) spectrum of **11**.

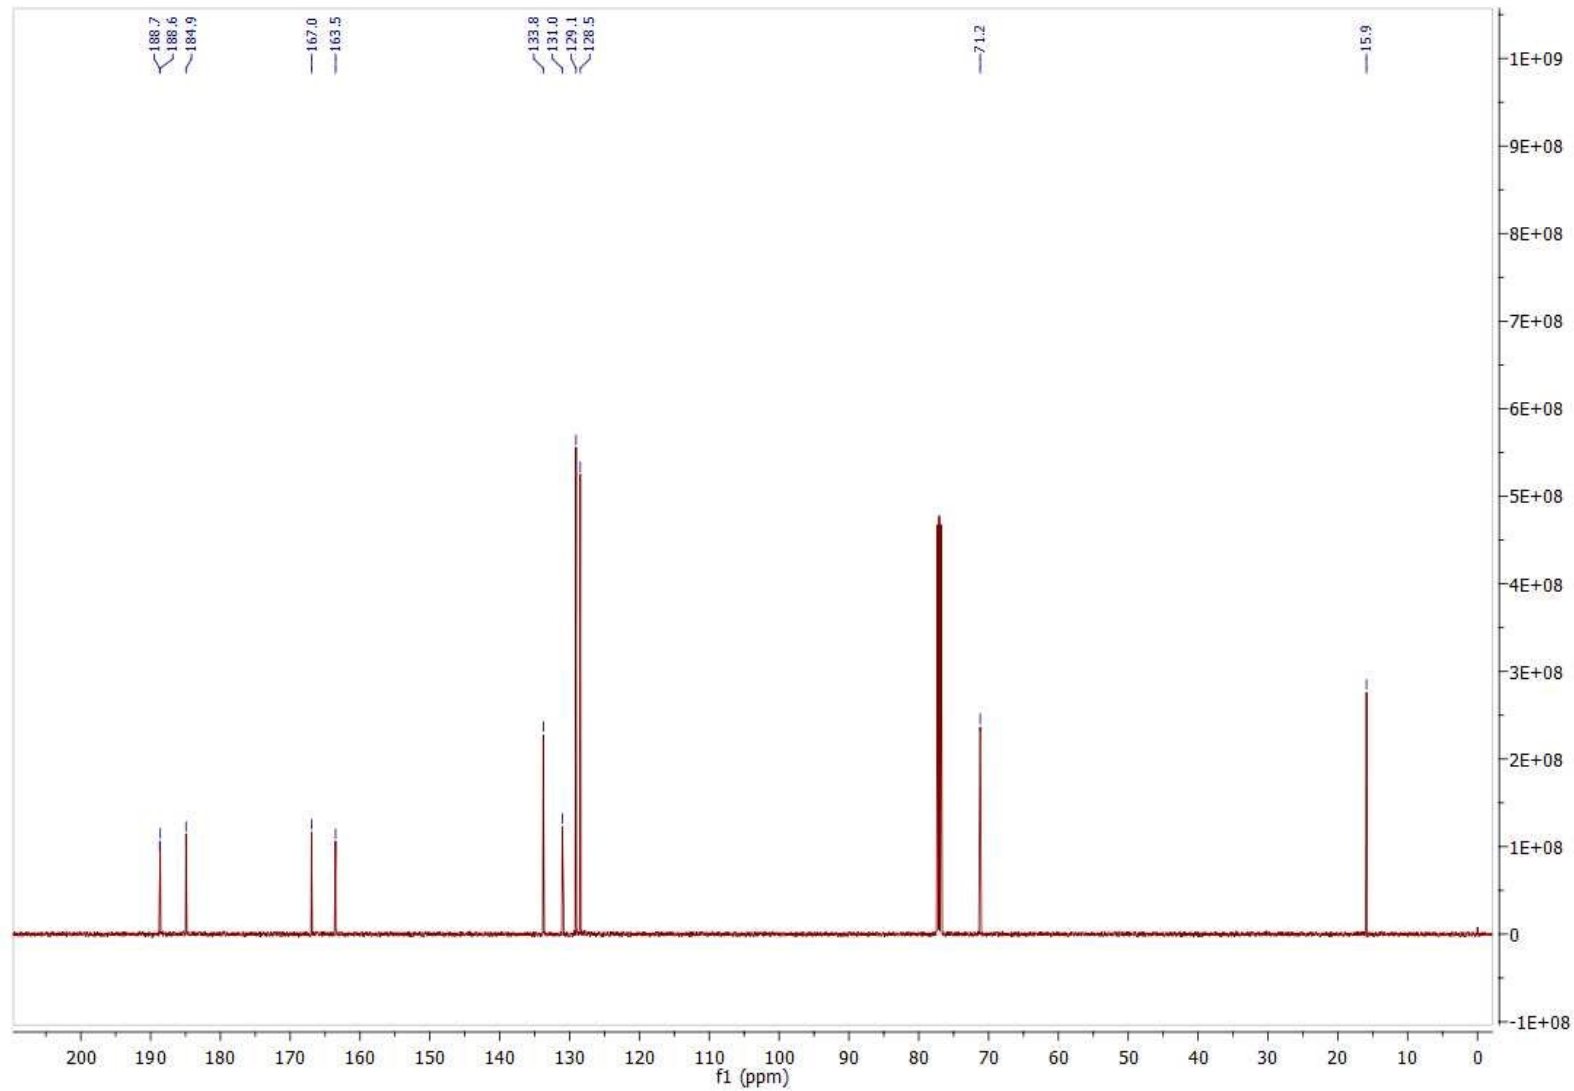

**Figure S10.**  $^{13}\text{C}$  NMR ( $\text{DMSO-}d_6$ , 126 MHz) spectrum of **11**.

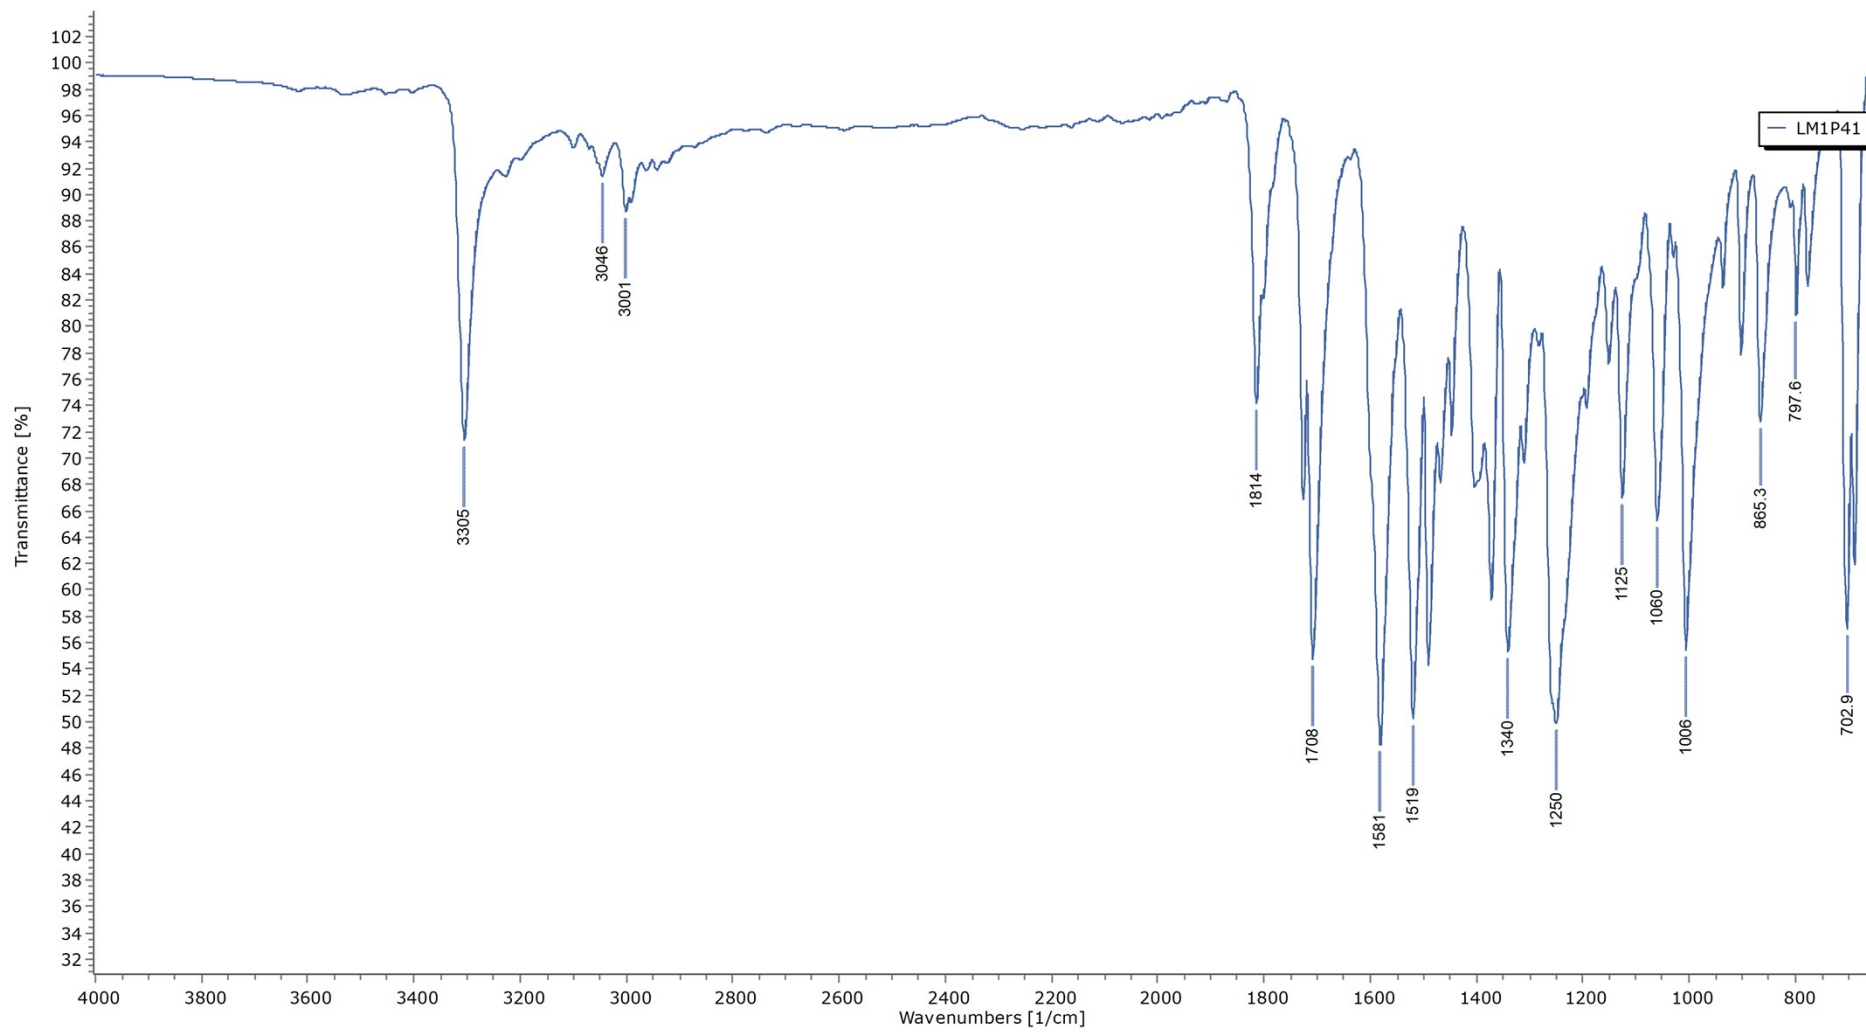

**Figure S11.** IR spectrum of **11**.



### Compounds

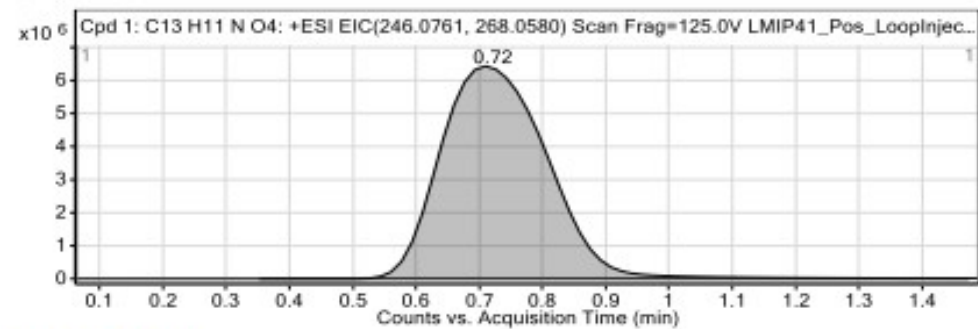

### Integration Peak List

| Start | RT   | End  | Height  | Area     |
|-------|------|------|---------|----------|
| 0.35  | 0.72 | 1.47 | 5992320 | 75718831 |

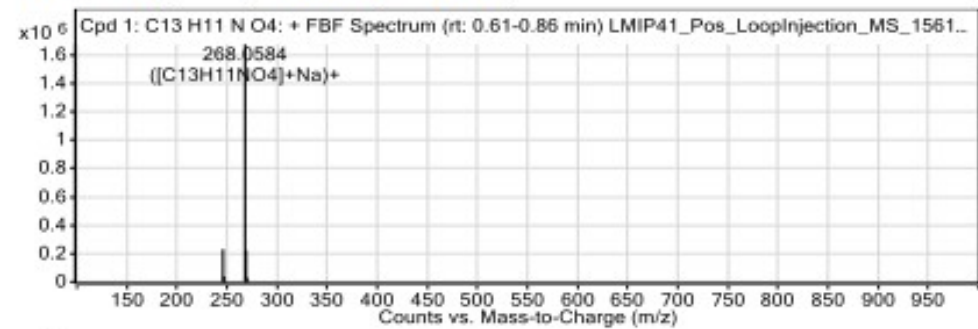

### Peak List

| m/z      | z | Abund      | Formula                                         | Ion                 |
|----------|---|------------|-------------------------------------------------|---------------------|
| 246.0764 | 1 | 230198.02  | C <sub>13</sub> H <sub>11</sub> NO <sub>4</sub> | (M+H) <sup>+</sup>  |
| 247.0794 | 1 | 36925.43   | C <sub>13</sub> H <sub>11</sub> NO <sub>4</sub> | (M+H) <sup>+</sup>  |
| 248.081  | 1 | 4828.54    | C <sub>13</sub> H <sub>11</sub> NO <sub>4</sub> | (M+H) <sup>+</sup>  |
| 268.0584 | 1 | 1675168.63 | C <sub>13</sub> H <sub>11</sub> NO <sub>4</sub> | (M+Na) <sup>+</sup> |
| 269.0617 | 1 | 222764.42  | C <sub>13</sub> H <sub>11</sub> NO <sub>4</sub> | (M+Na) <sup>+</sup> |
| 270.0638 | 1 | 29288.15   | C <sub>13</sub> H <sub>11</sub> NO <sub>4</sub> | (M+Na) <sup>+</sup> |
| 271.0669 | 1 | 3066.31    | C <sub>13</sub> H <sub>11</sub> NO <sub>4</sub> | (M+Na) <sup>+</sup> |

--- End Of Report ---

Figure S12. HRMS of 11.

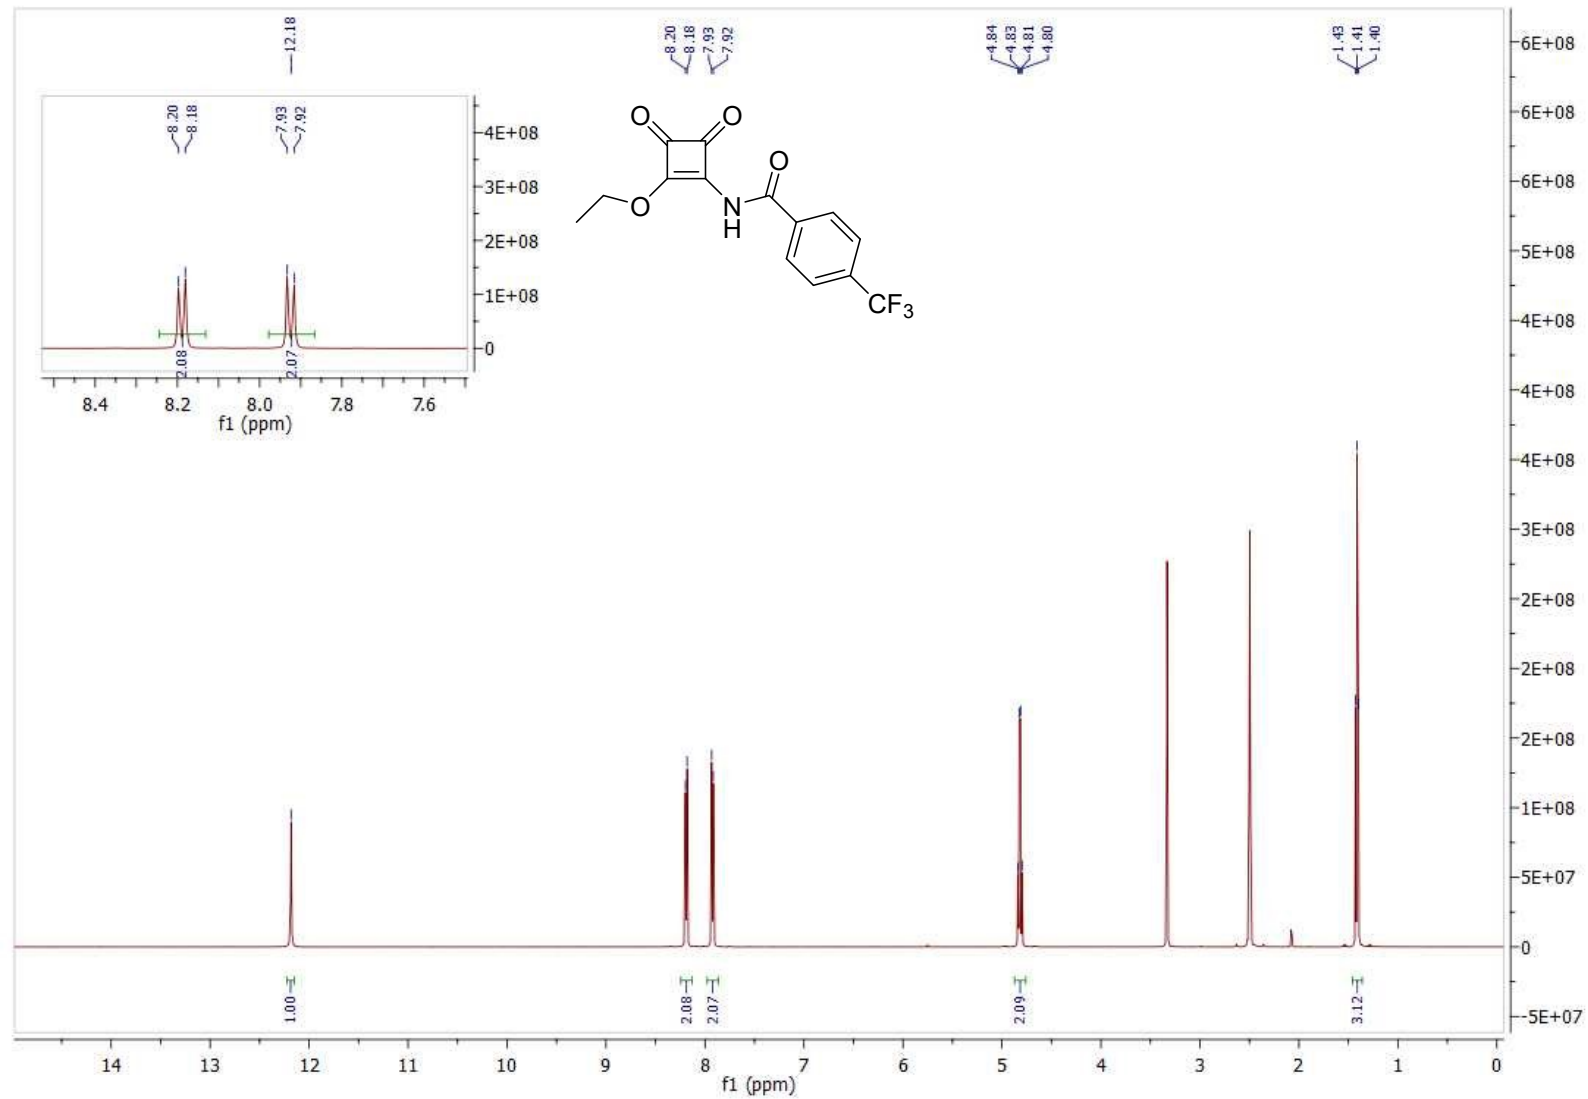

**Figure S13.**  $^1\text{H}$  NMR ( $\text{DMSO-}d_6$ , 500 MHz) spectrum of **12**.

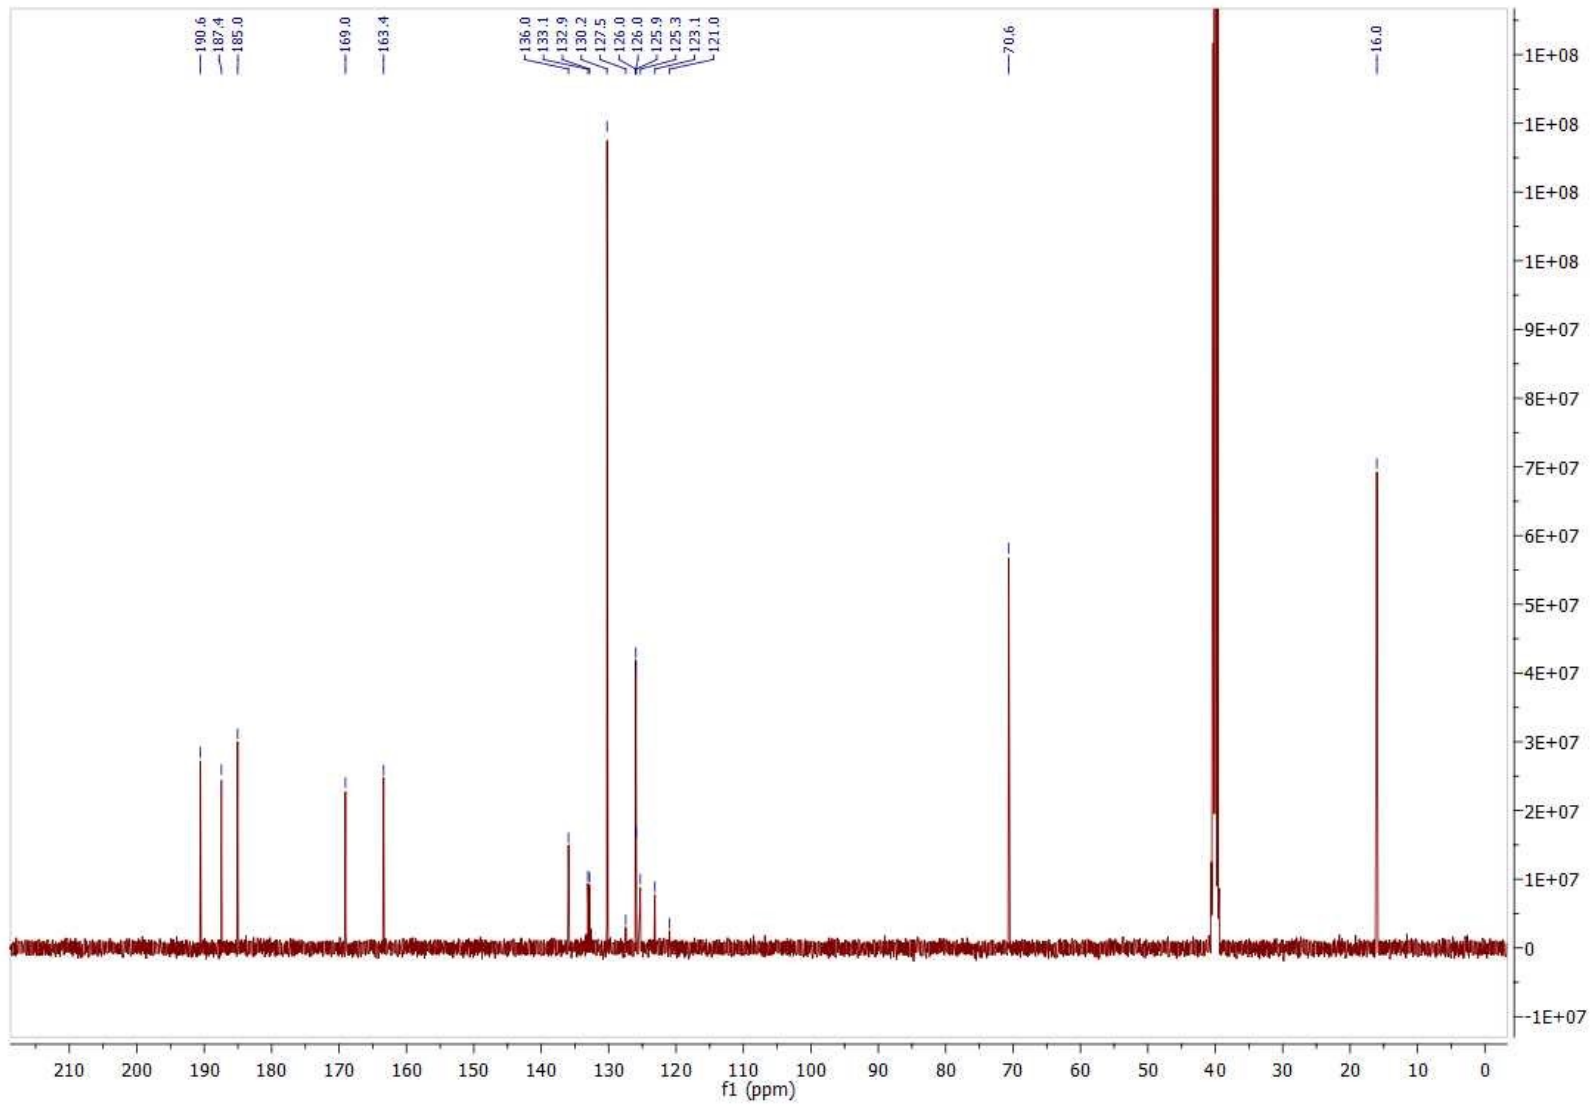

**Figure S14.**  $^{13}\text{C}$  NMR ( $\text{DMSO-}d_6$ , 126 MHz) spectrum of **12**.

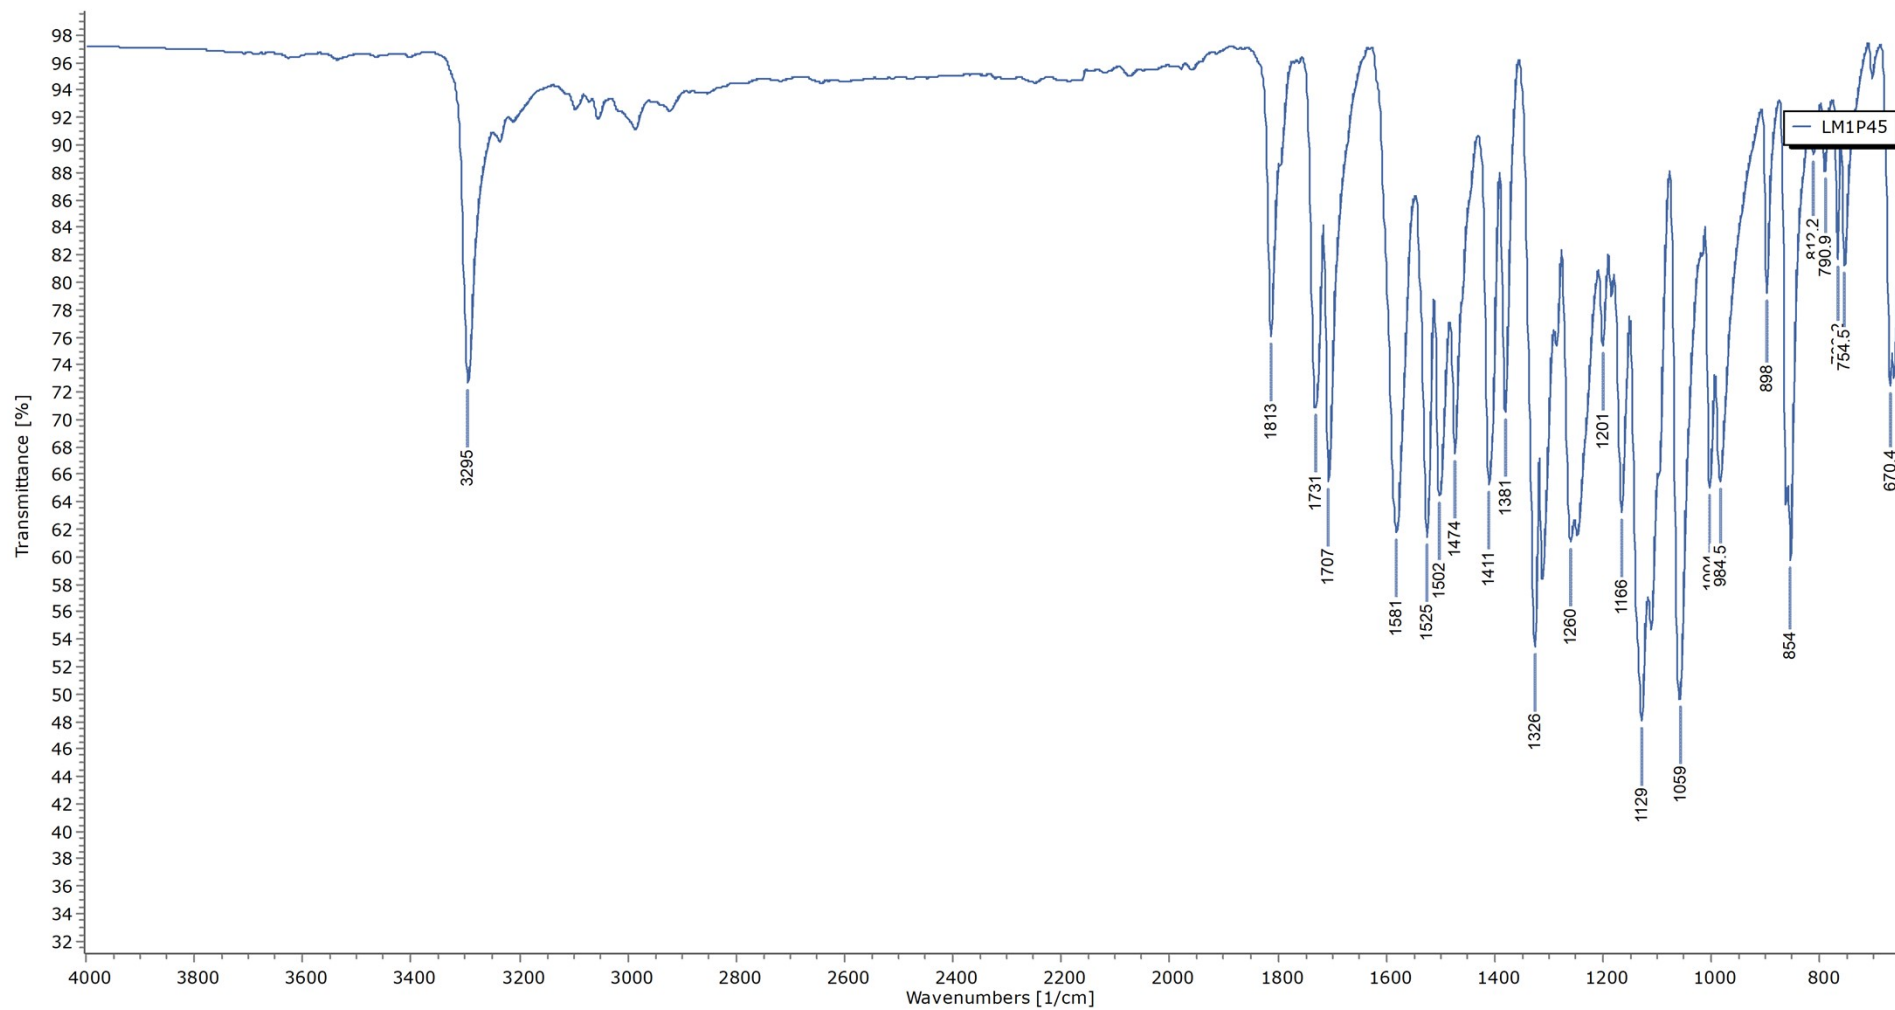

**Figure S15.** IR spectrum of **12**.

### Compounds

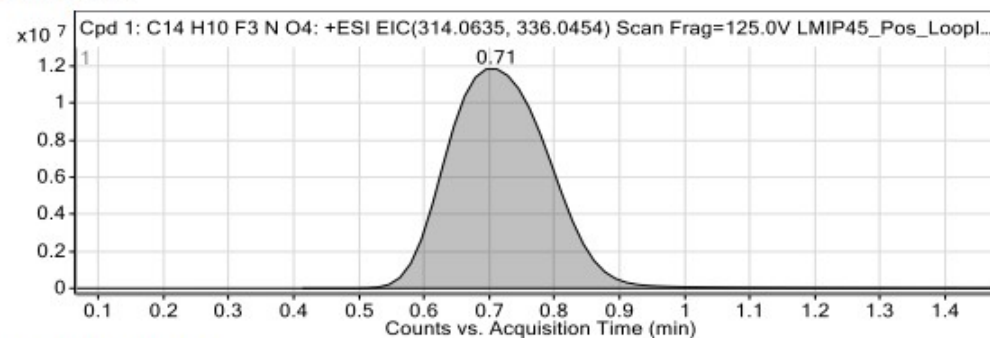

### Integration Peak List

| Start | RT   | End  | Height   | Area      |
|-------|------|------|----------|-----------|
| 0.41  | 0.71 | 1.47 | 11649459 | 132314563 |

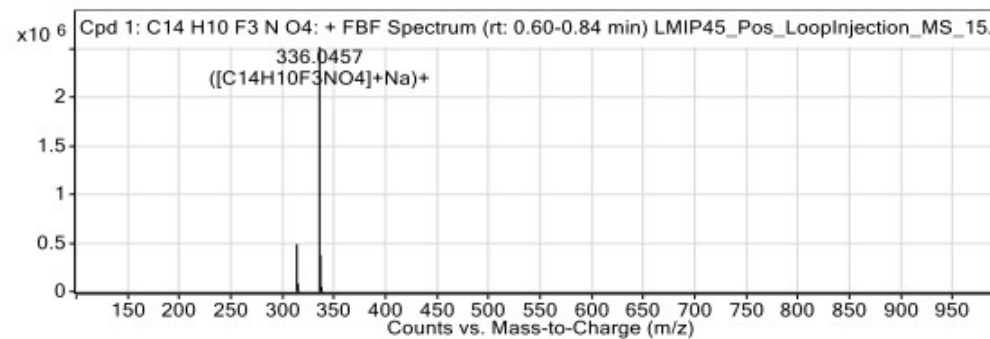

### Peak List

| m/z      | z | Abund      | Formula                                                        | Ion                 |
|----------|---|------------|----------------------------------------------------------------|---------------------|
| 314.0637 | 1 | 486639.28  | C <sub>14</sub> H <sub>10</sub> F <sub>3</sub> NO <sub>4</sub> | (M+H) <sup>+</sup>  |
| 315.0676 | 1 | 80786.87   | C <sub>14</sub> H <sub>10</sub> F <sub>3</sub> NO <sub>4</sub> | (M+H) <sup>+</sup>  |
| 316.0704 | 1 | 9808.21    | C <sub>14</sub> H <sub>10</sub> F <sub>3</sub> NO <sub>4</sub> | (M+H) <sup>+</sup>  |
| 336.0457 | 1 | 2520331.75 | C <sub>14</sub> H <sub>10</sub> F <sub>3</sub> NO <sub>4</sub> | (M+Na) <sup>+</sup> |
| 337.0492 | 1 | 374240.66  | C <sub>14</sub> H <sub>10</sub> F <sub>3</sub> NO <sub>4</sub> | (M+Na) <sup>+</sup> |
| 338.0514 | 1 | 46300.03   | C <sub>14</sub> H <sub>10</sub> F <sub>3</sub> NO <sub>4</sub> | (M+Na) <sup>+</sup> |
| 339.0548 | 1 | 4834.05    | C <sub>14</sub> H <sub>10</sub> F <sub>3</sub> NO <sub>4</sub> | (M+Na) <sup>+</sup> |

--- End Of Report ---

Figure S16. HRMS of 12.

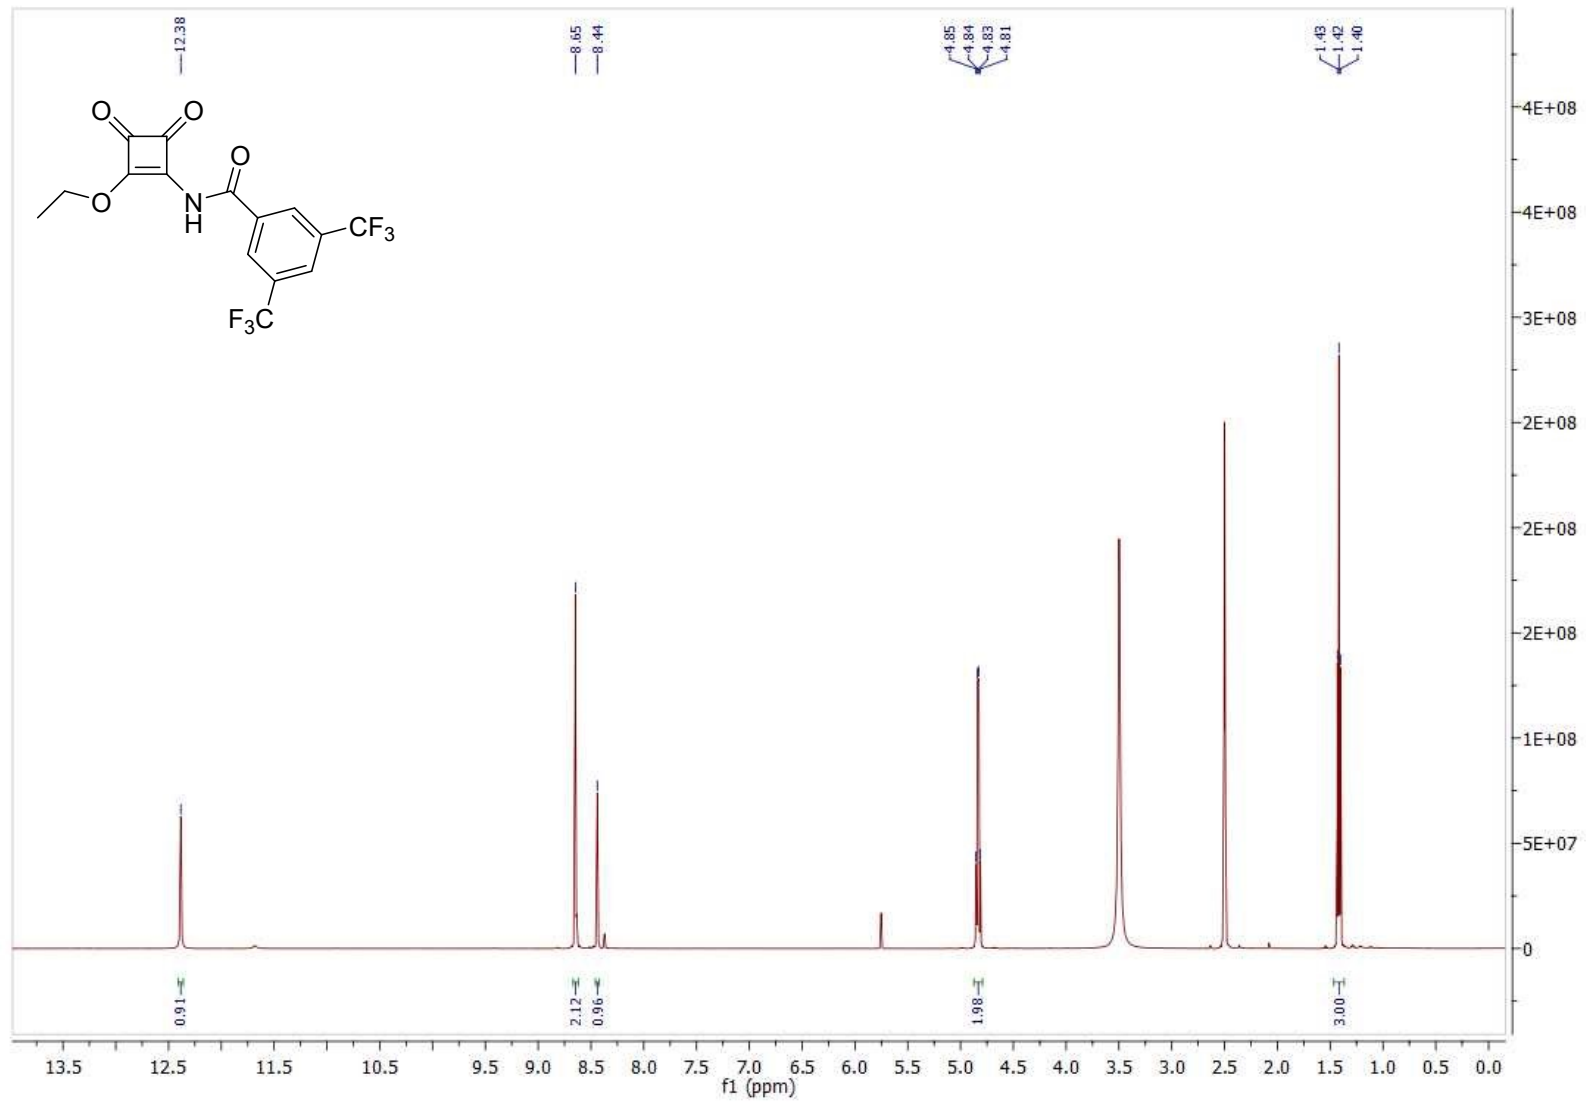

**Figure S17.** <sup>1</sup>H NMR (DMSO-d<sub>6</sub>, 500 MHz) spectrum of **13**.

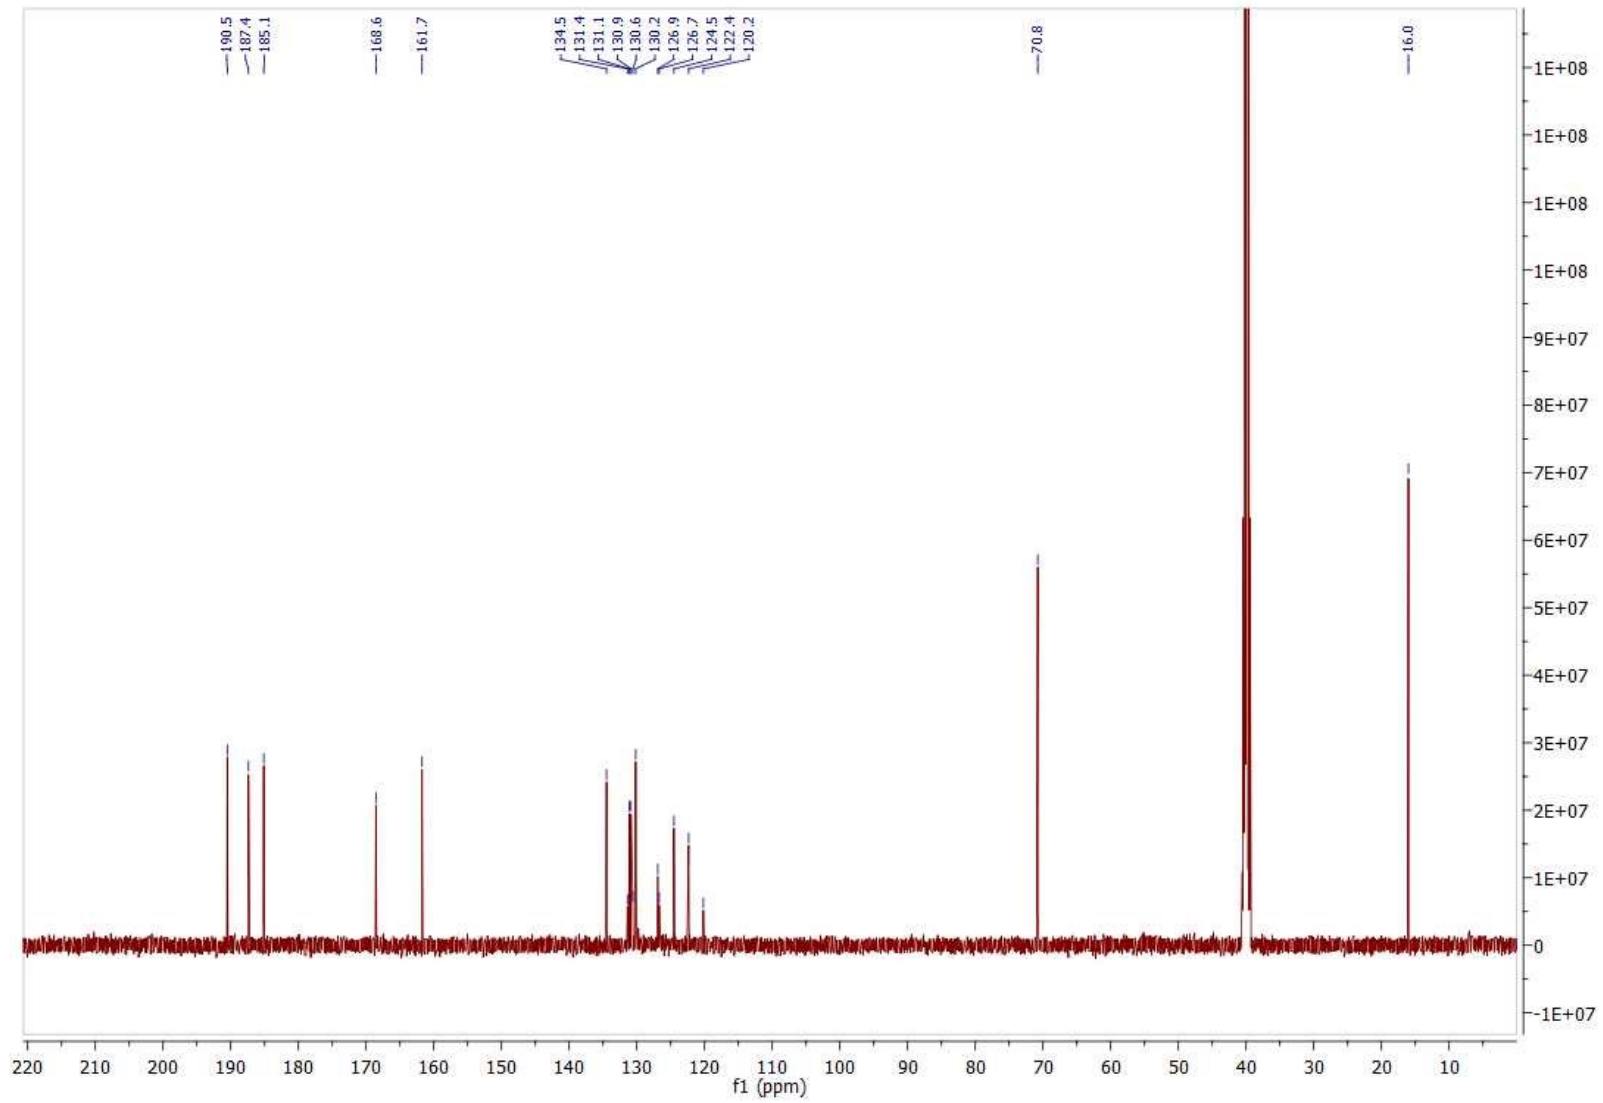

**Figure S18.**  $^{13}\text{C}$  NMR ( $\text{DMSO-}d_6$ , 126 MHz) spectrum of **13**.

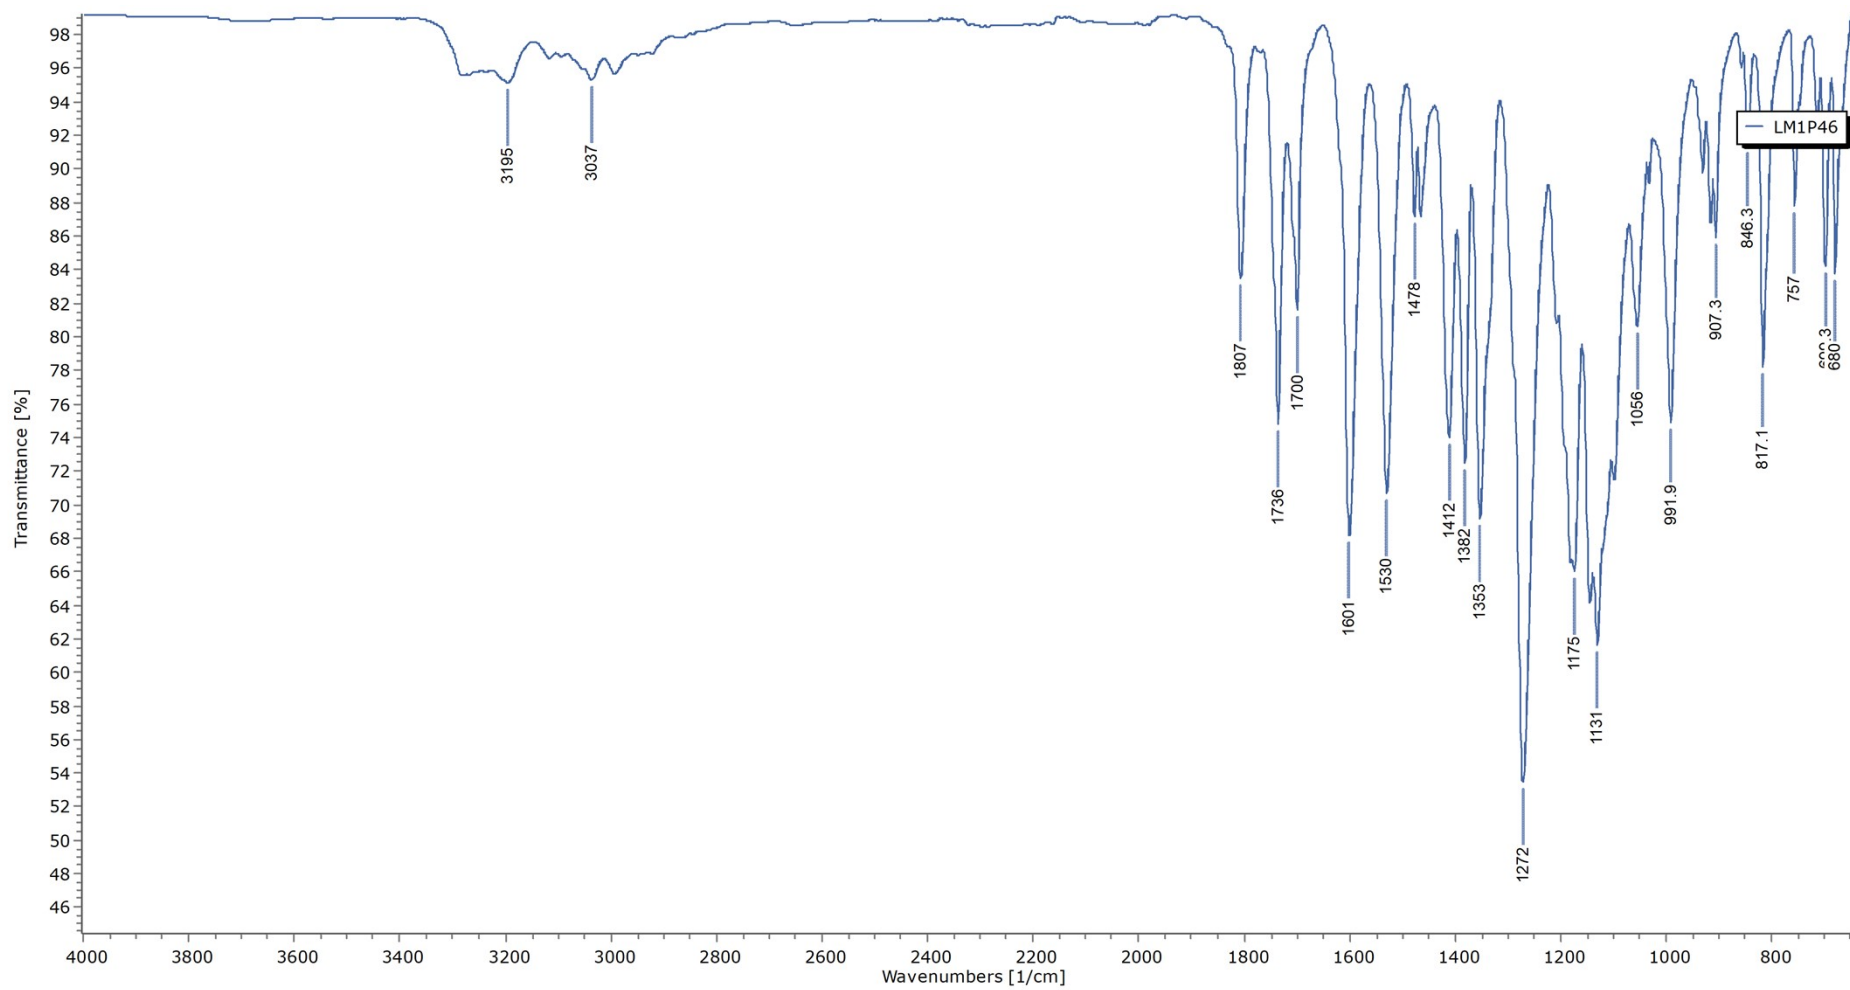

**Figure S19.** IR spectrum of **13**.



### Compounds

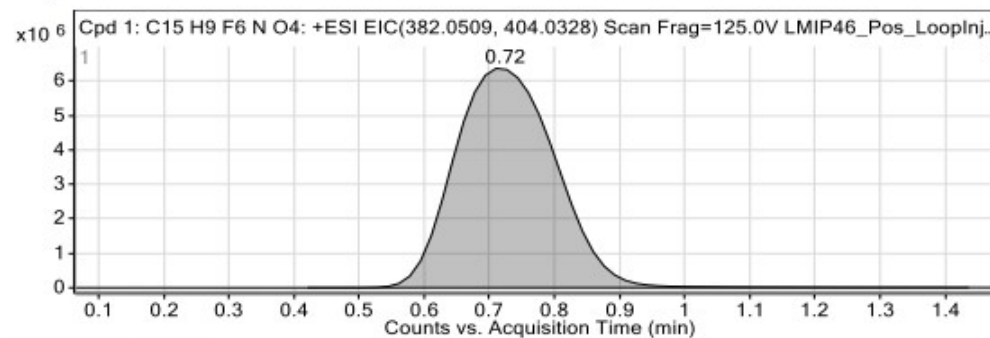

### Integration Peak List

| Start | RT   | End  | Height  | Area     |
|-------|------|------|---------|----------|
| 0.42  | 0.72 | 1.44 | 5957134 | 69029552 |

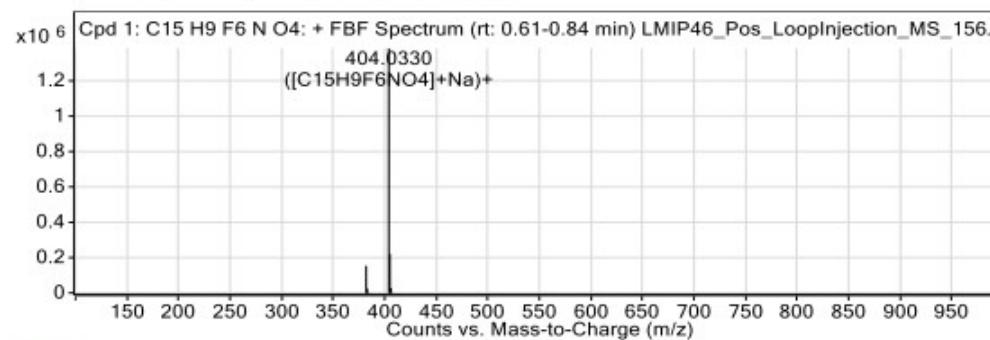

### Peak List

| m/z      | z | Abund      | Formula                                                                     | Ion                 |
|----------|---|------------|-----------------------------------------------------------------------------|---------------------|
| 382.051  | 1 | 153784.44  | C <sub>15</sub> H <sub>9</sub> F <sub>6</sub> N <sub>4</sub> O <sub>4</sub> | (M+H) <sup>+</sup>  |
| 383.0541 | 1 | 23695.58   | C <sub>15</sub> H <sub>9</sub> F <sub>6</sub> N <sub>4</sub> O <sub>4</sub> | (M+H) <sup>+</sup>  |
| 384.0563 | 1 | 3103.73    | C <sub>15</sub> H <sub>9</sub> F <sub>6</sub> N <sub>4</sub> O <sub>4</sub> | (M+H) <sup>+</sup>  |
| 404.033  | 1 | 1386279.25 | C <sub>15</sub> H <sub>9</sub> F <sub>6</sub> N <sub>4</sub> O <sub>4</sub> | (M+Na) <sup>+</sup> |
| 405.0365 | 1 | 220258.97  | C <sub>15</sub> H <sub>9</sub> F <sub>6</sub> N <sub>4</sub> O <sub>4</sub> | (M+Na) <sup>+</sup> |
| 406.0385 | 1 | 27570.79   | C <sub>15</sub> H <sub>9</sub> F <sub>6</sub> N <sub>4</sub> O <sub>4</sub> | (M+Na) <sup>+</sup> |
| 407.0411 | 1 | 2809.82    | C <sub>15</sub> H <sub>9</sub> F <sub>6</sub> N <sub>4</sub> O <sub>4</sub> | (M+Na) <sup>+</sup> |

--- End Of Report ---

Figure S20. HRMS of 13.

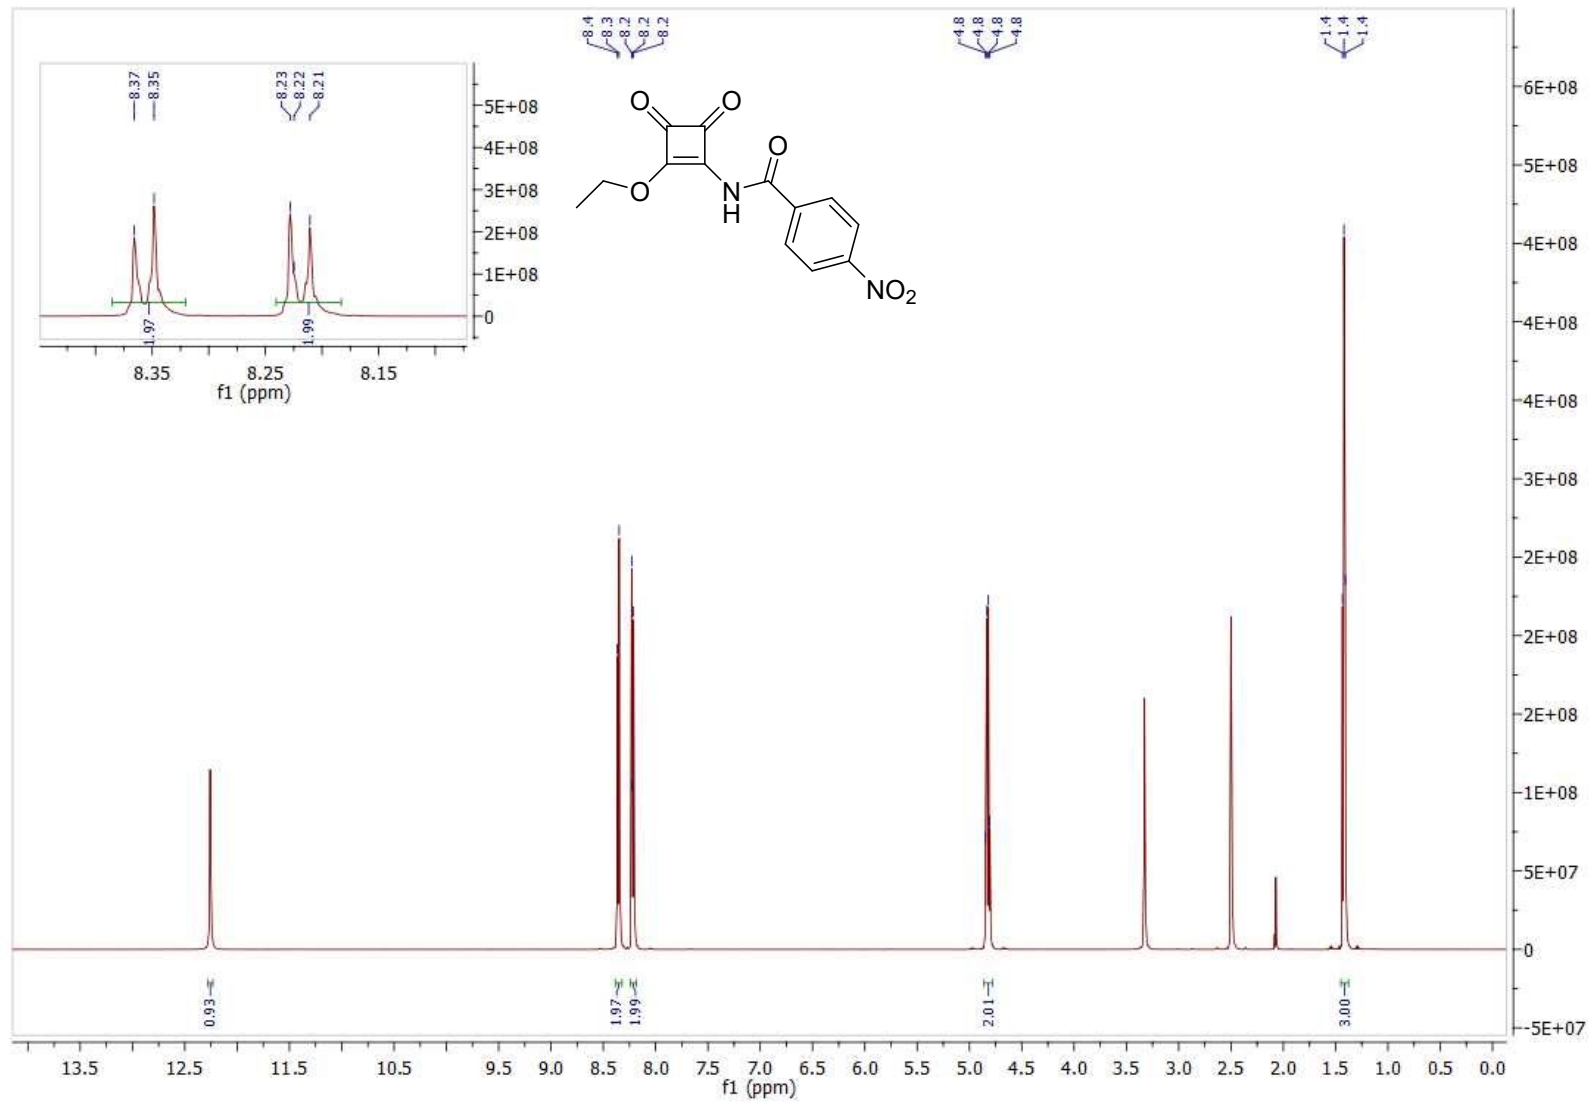

**Figure S21.**  $^1\text{H}$  NMR ( $\text{DMSO-d}_6$ , 500 MHz) spectrum of **14**.

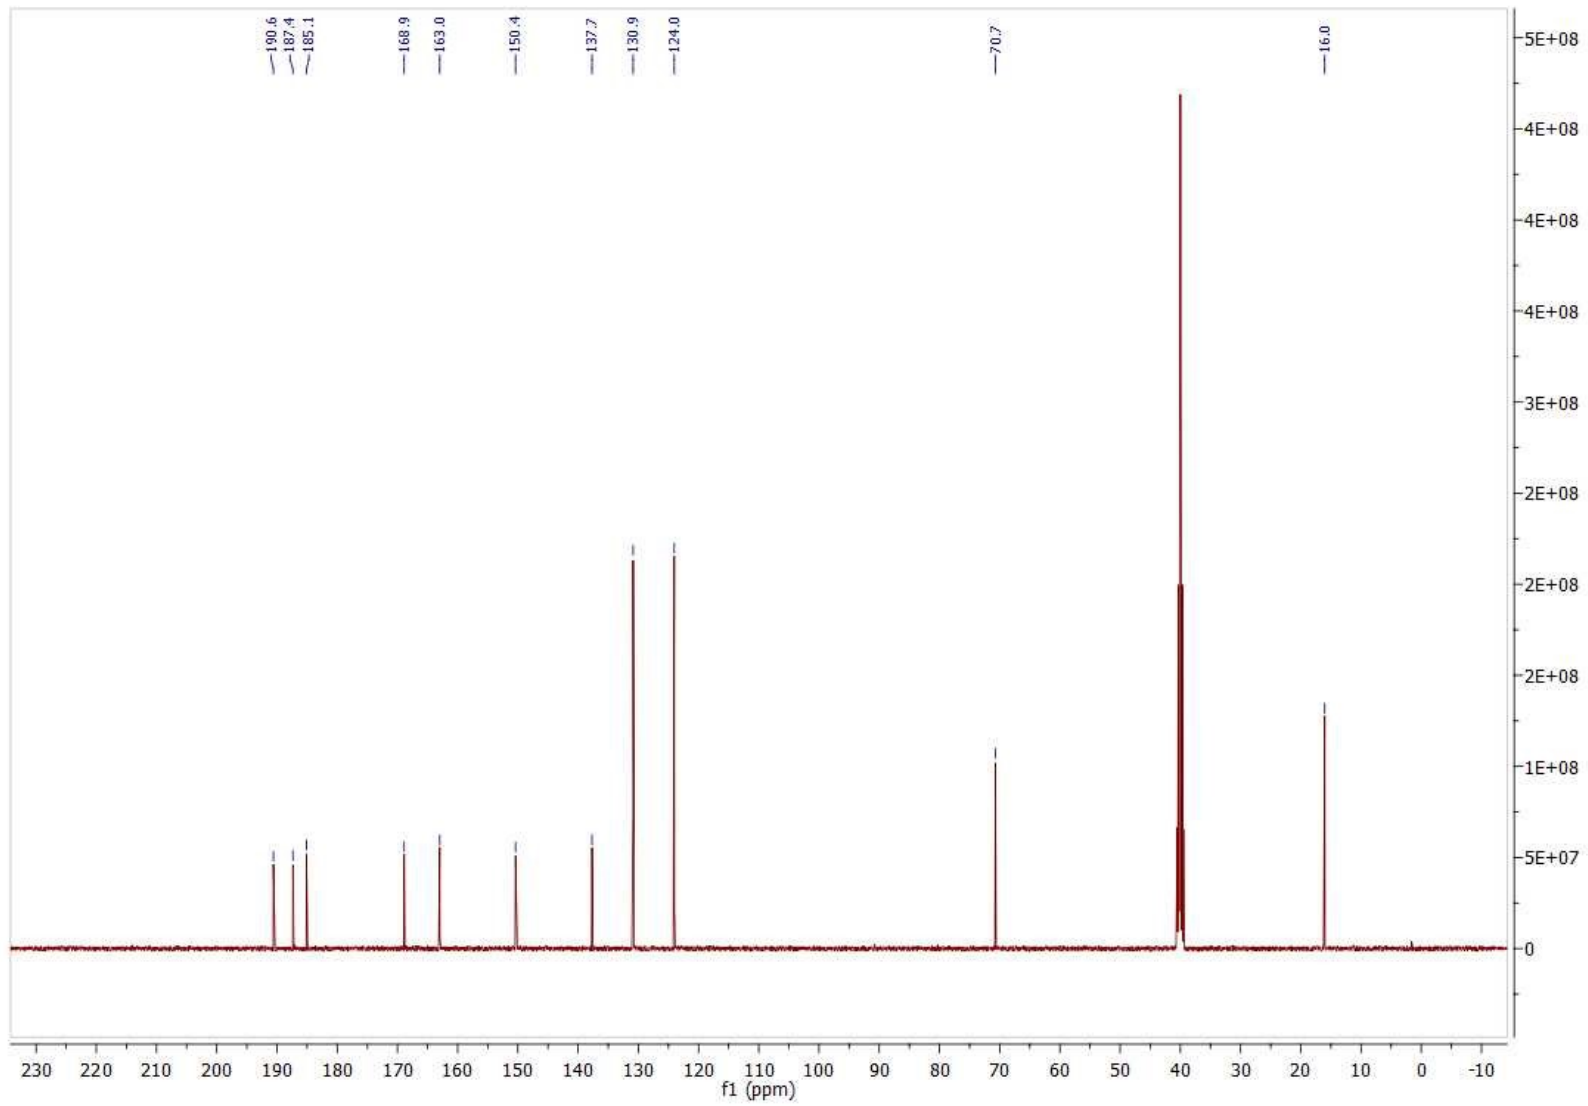

**Figure S22.**  $^{13}\text{C}$  NMR ( $\text{DMSO-d}_6$ , 126 MHz) spectrum of **14**.

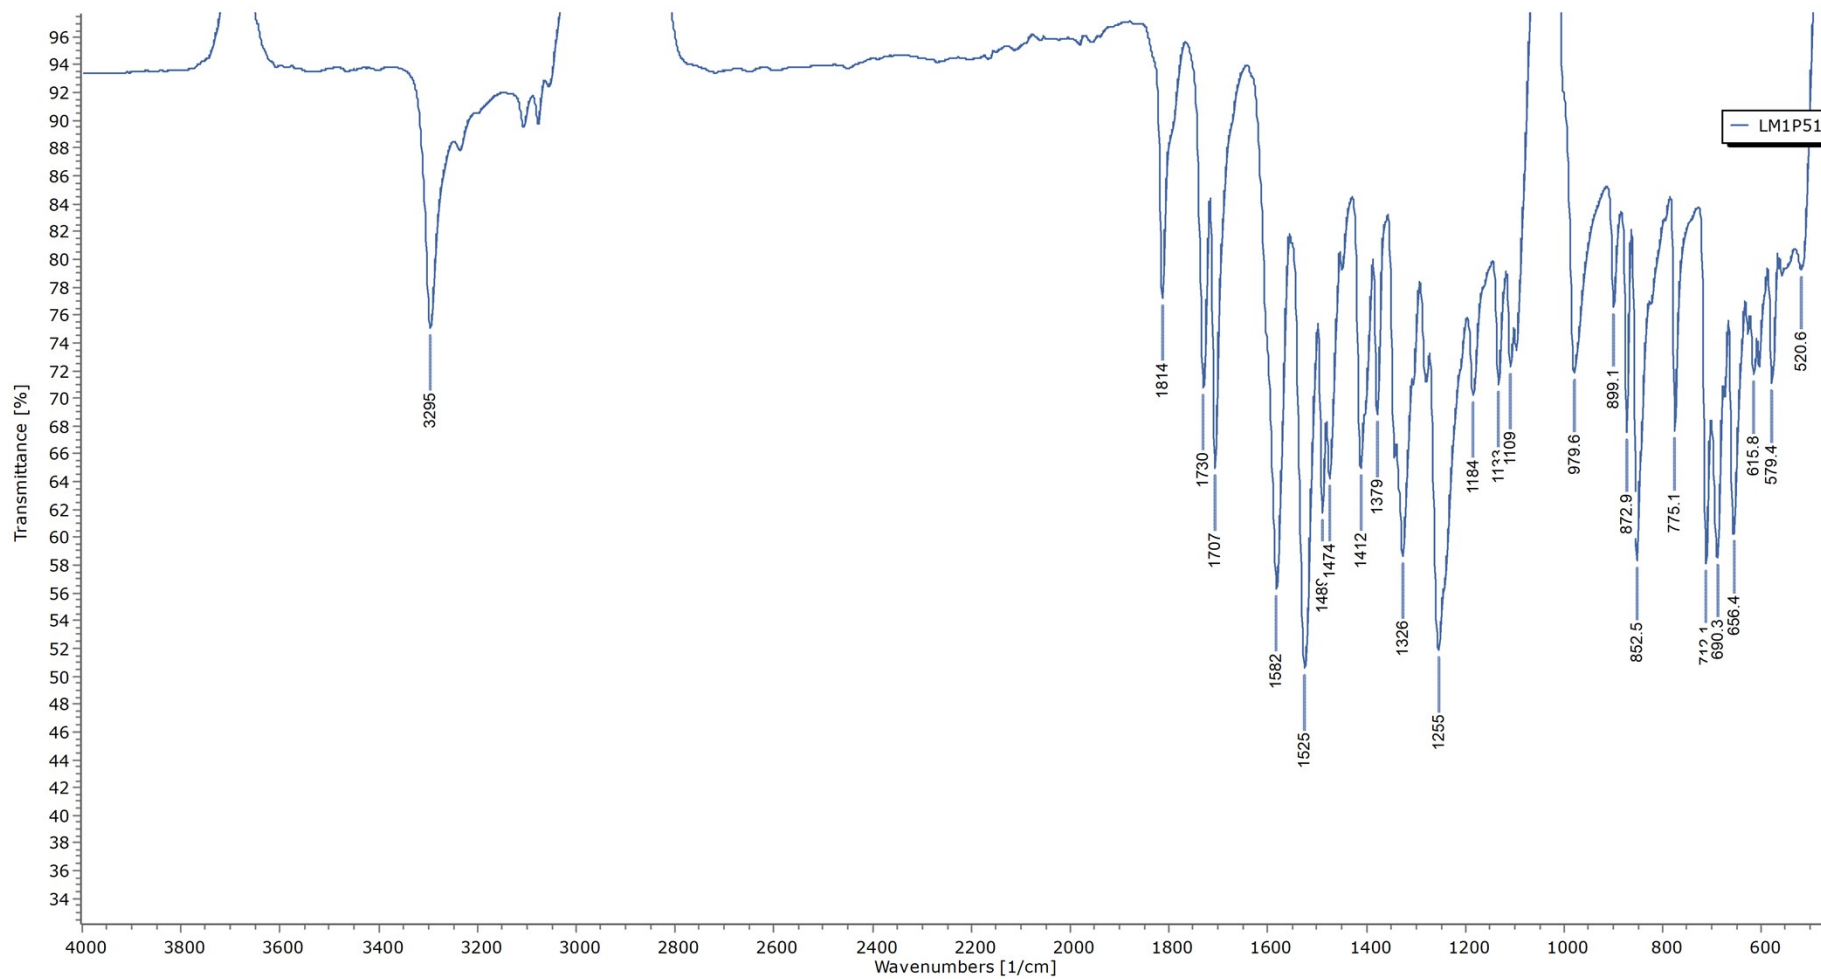

Figure S23. IR spectrum of 14.

### Compounds

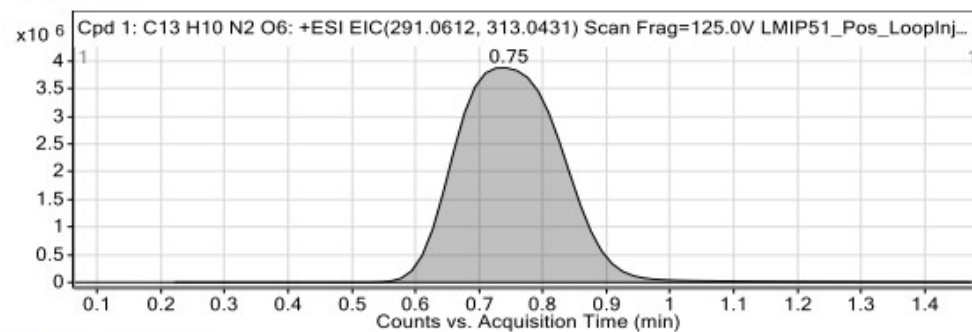

### Integration Peak List

| Start | RT   | End  | Height  | Area     |
|-------|------|------|---------|----------|
| 0.22  | 0.75 | 1.47 | 3822997 | 46311078 |

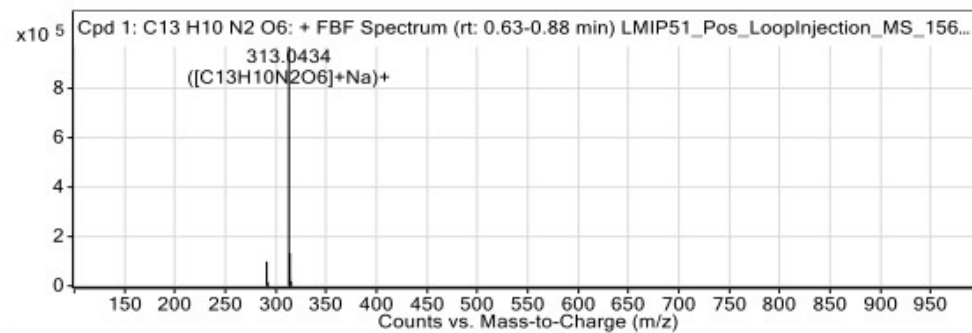

### Peak List

| m/z      | z | Abund     | Formula                                                       | Ion                 |
|----------|---|-----------|---------------------------------------------------------------|---------------------|
| 291.0613 | 1 | 98875.48  | C <sub>13</sub> H <sub>10</sub> N <sub>2</sub> O <sub>6</sub> | (M+H) <sup>+</sup>  |
| 292.0647 | 1 | 15112.59  | C <sub>13</sub> H <sub>10</sub> N <sub>2</sub> O <sub>6</sub> | (M+H) <sup>+</sup>  |
| 293.0672 | 1 | 2379.04   | C <sub>13</sub> H <sub>10</sub> N <sub>2</sub> O <sub>6</sub> | (M+H) <sup>+</sup>  |
| 313.0434 | 1 | 972596.19 | C <sub>13</sub> H <sub>10</sub> N <sub>2</sub> O <sub>6</sub> | (M+Na) <sup>+</sup> |
| 314.0467 | 1 | 133088.45 | C <sub>13</sub> H <sub>10</sub> N <sub>2</sub> O <sub>6</sub> | (M+Na) <sup>+</sup> |
| 315.049  | 1 | 20580.38  | C <sub>13</sub> H <sub>10</sub> N <sub>2</sub> O <sub>6</sub> | (M+Na) <sup>+</sup> |
| 316.0516 | 1 | 2236.74   | C <sub>13</sub> H <sub>10</sub> N <sub>2</sub> O <sub>6</sub> | (M+Na) <sup>+</sup> |

--- End Of Report ---

Figure S24. HRMS of 14.

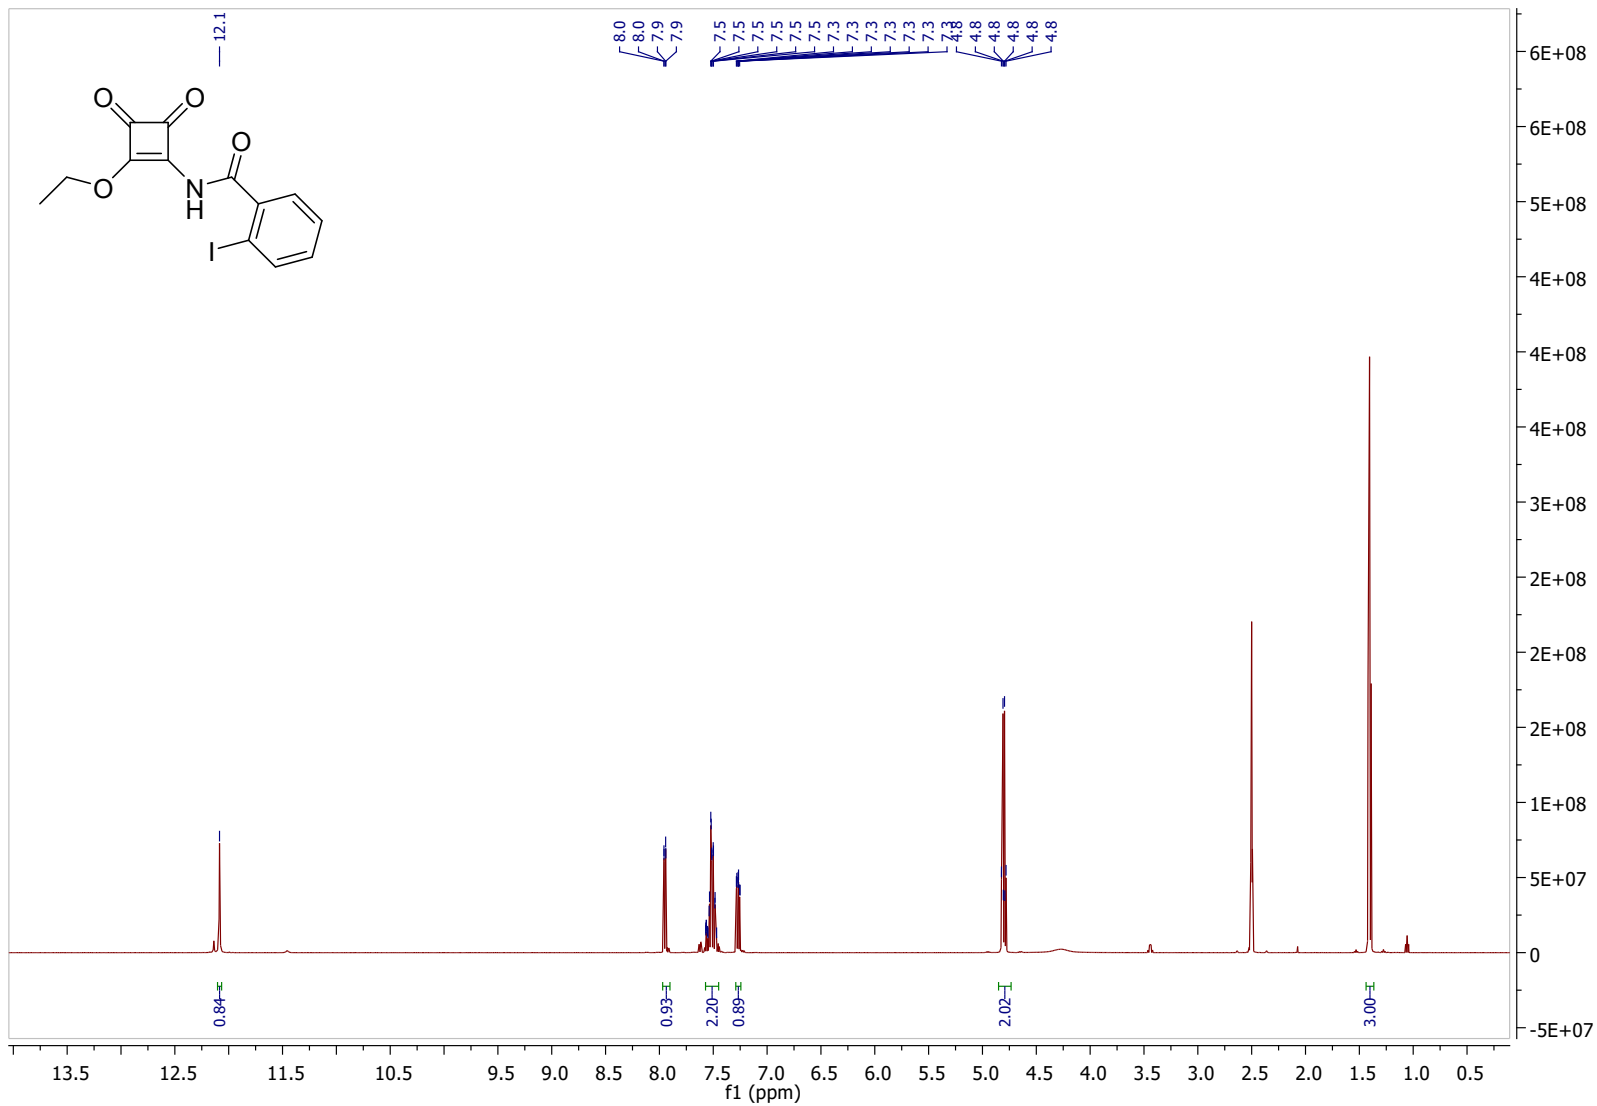

Figure S25. <sup>1</sup>H NMR (DMSO-d<sub>6</sub>, 500 MHz) spectrum of 15.

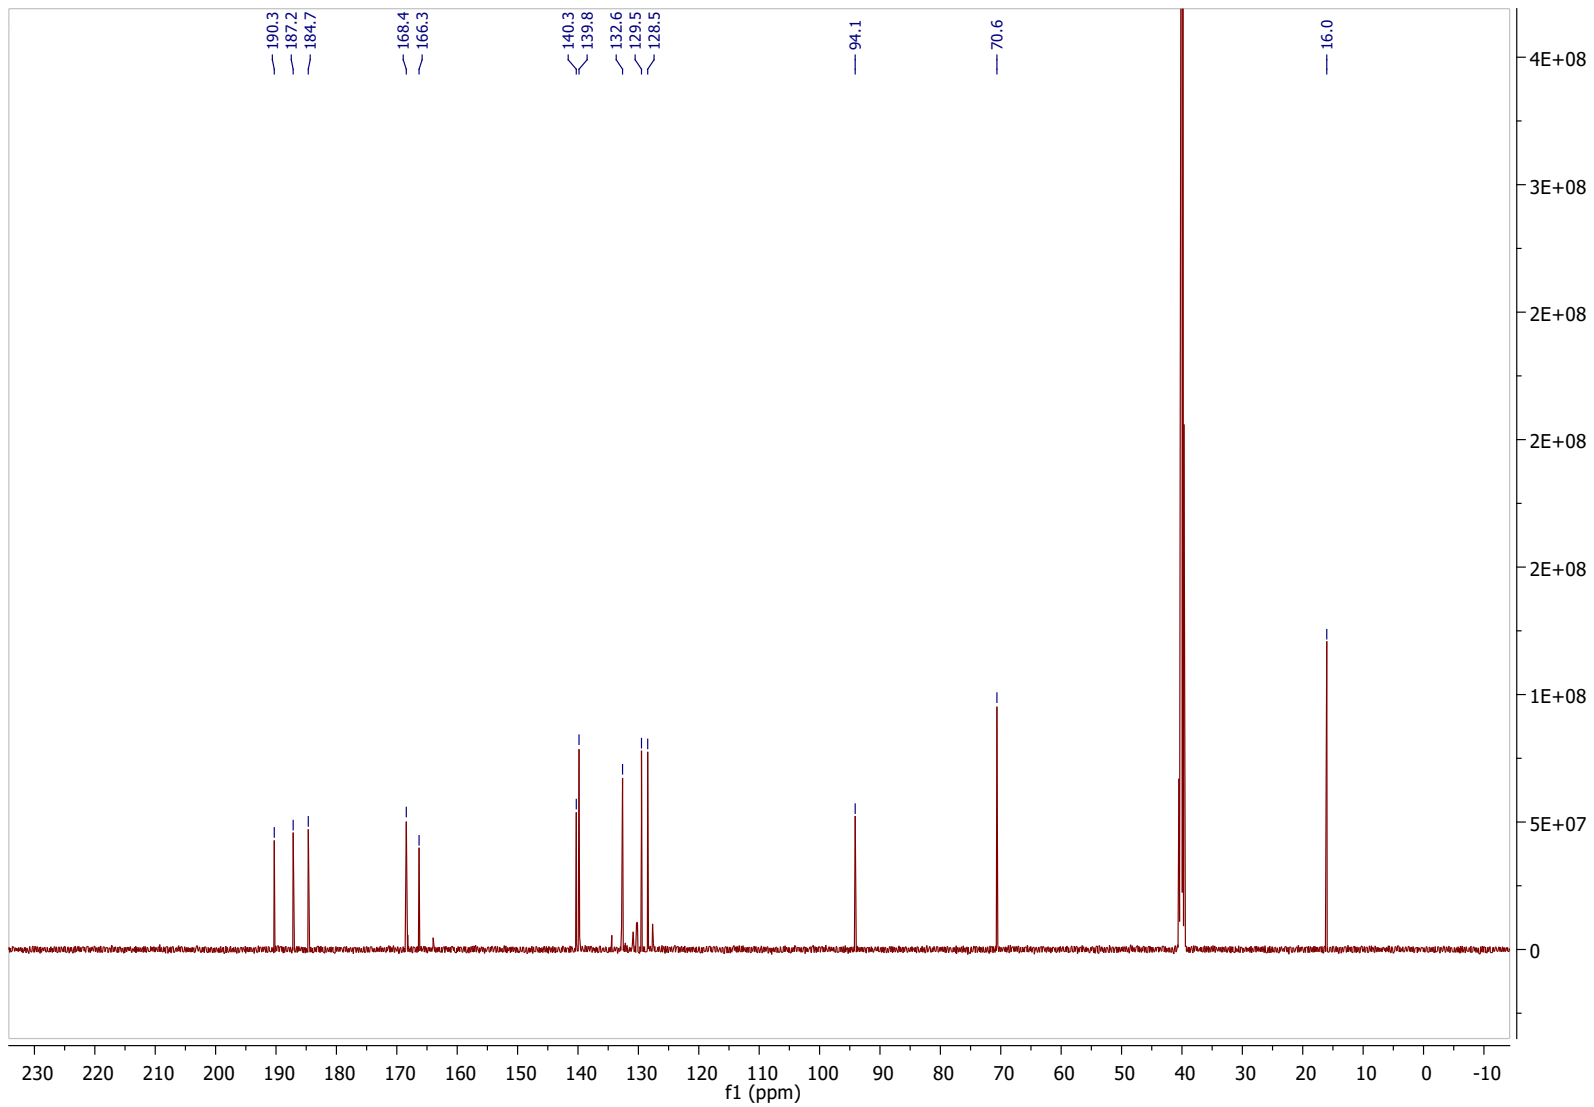

**Figure S26.**  $^{13}\text{C}$  NMR ( $\text{DMSO-}d_6$ , 126 MHz) spectrum of **15**.

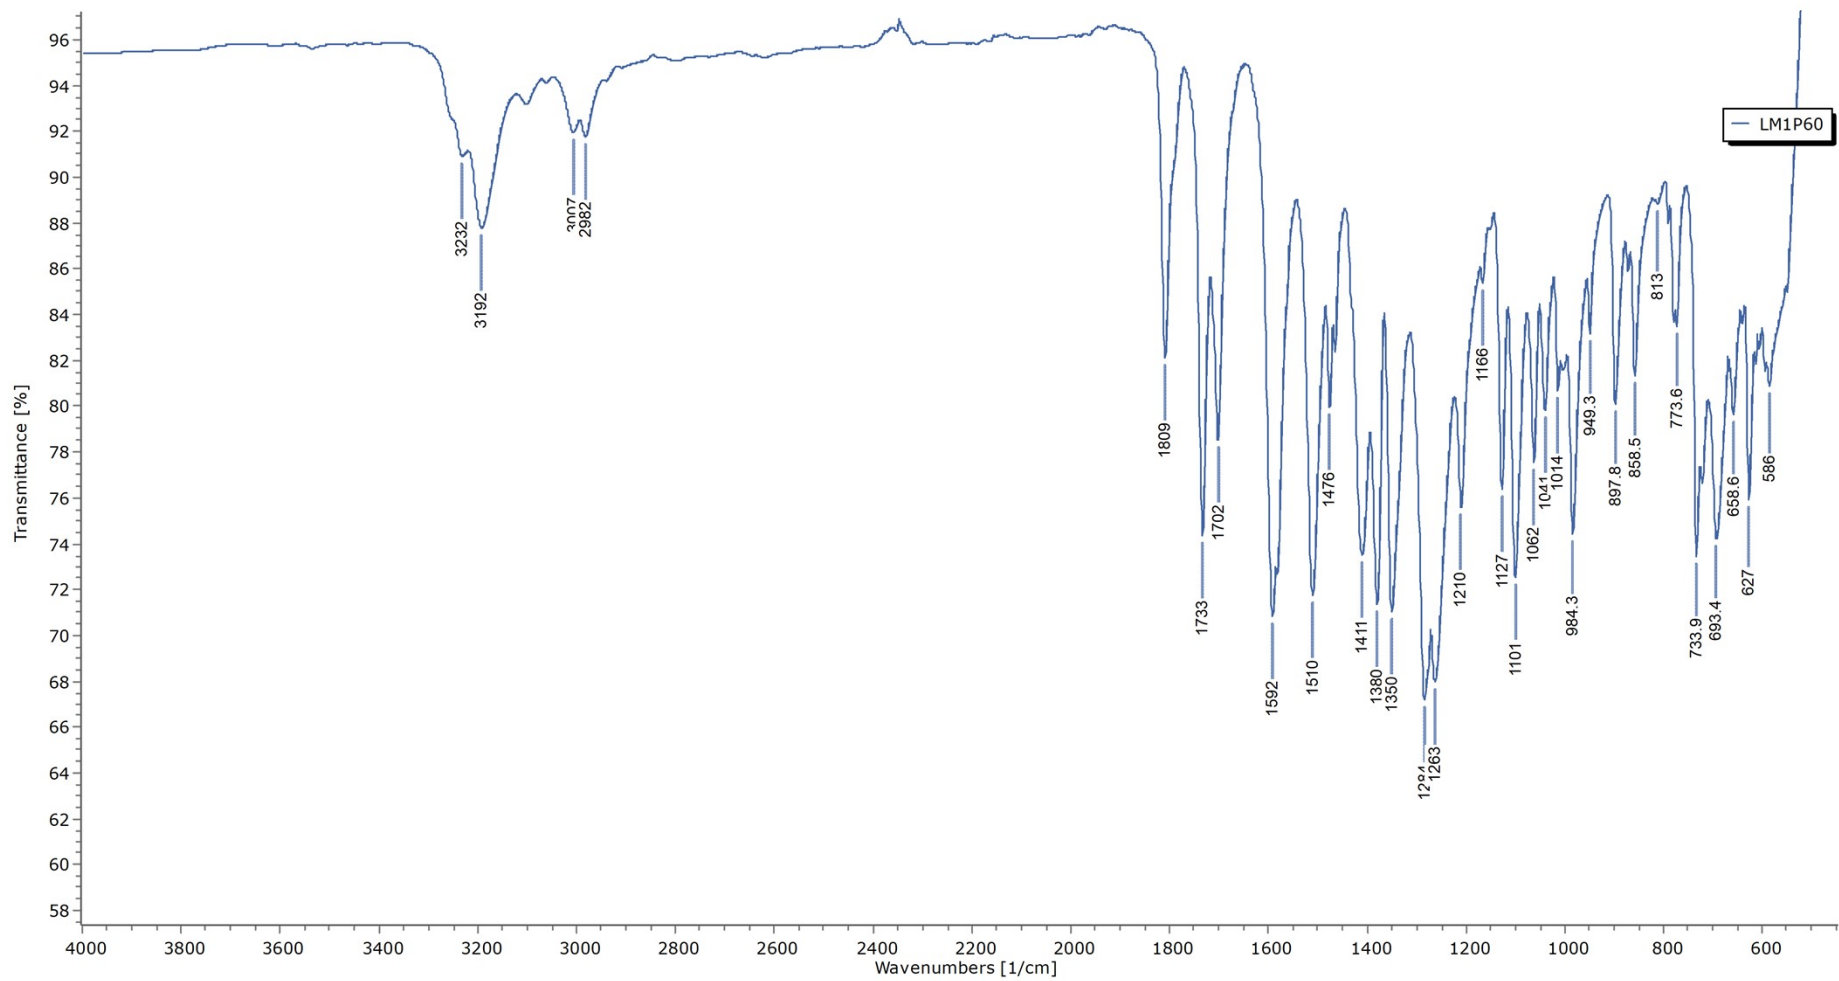

**Figure S27.** IR spectrum of **15**.



### Compounds

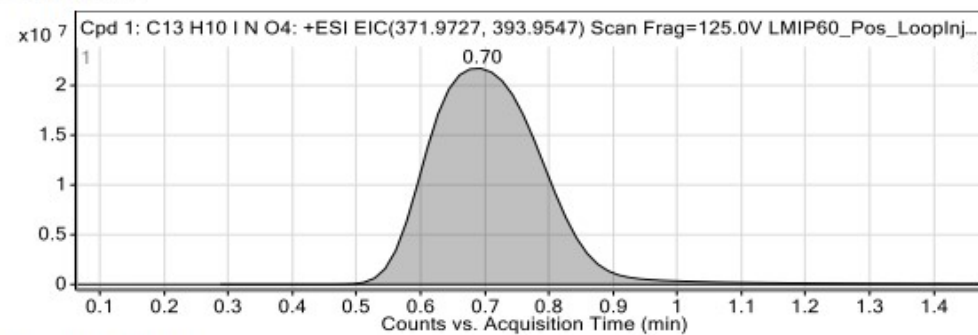

### Integration Peak List

| Start | RT  | End  | Height   | Area      |
|-------|-----|------|----------|-----------|
| 0.29  | 0.7 | 1.47 | 21498565 | 273497514 |

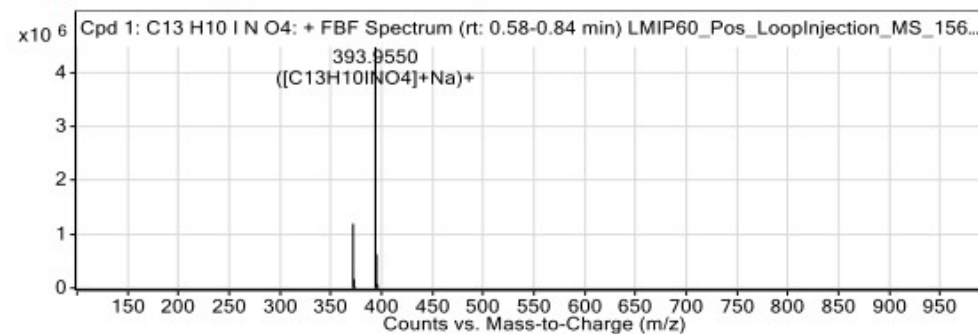

### Peak List

| m/z      | z | Abund      | Formula                                           | Ion                 |
|----------|---|------------|---------------------------------------------------|---------------------|
| 371.9728 | 1 | 1196103.25 | C <sub>13</sub> H <sub>10</sub> I NO <sub>4</sub> | (M+H) <sup>+</sup>  |
| 372.9761 | 1 | 167462.86  | C <sub>13</sub> H <sub>10</sub> I NO <sub>4</sub> | (M+H) <sup>+</sup>  |
| 373.9784 | 1 | 20403.75   | C <sub>13</sub> H <sub>10</sub> I NO <sub>4</sub> | (M+H) <sup>+</sup>  |
| 393.955  | 1 | 4484876.5  | C <sub>13</sub> H <sub>10</sub> I NO <sub>4</sub> | (M+Na) <sup>+</sup> |
| 394.9583 | 1 | 630267.38  | C <sub>13</sub> H <sub>10</sub> I NO <sub>4</sub> | (M+Na) <sup>+</sup> |
| 395.9603 | 1 | 72445.63   | C <sub>13</sub> H <sub>10</sub> I NO <sub>4</sub> | (M+Na) <sup>+</sup> |
| 396.9626 | 1 | 6382.16    | C <sub>13</sub> H <sub>10</sub> I NO <sub>4</sub> | (M+Na) <sup>+</sup> |

--- End Of Report ---

Figure S28. HRMS of 15.

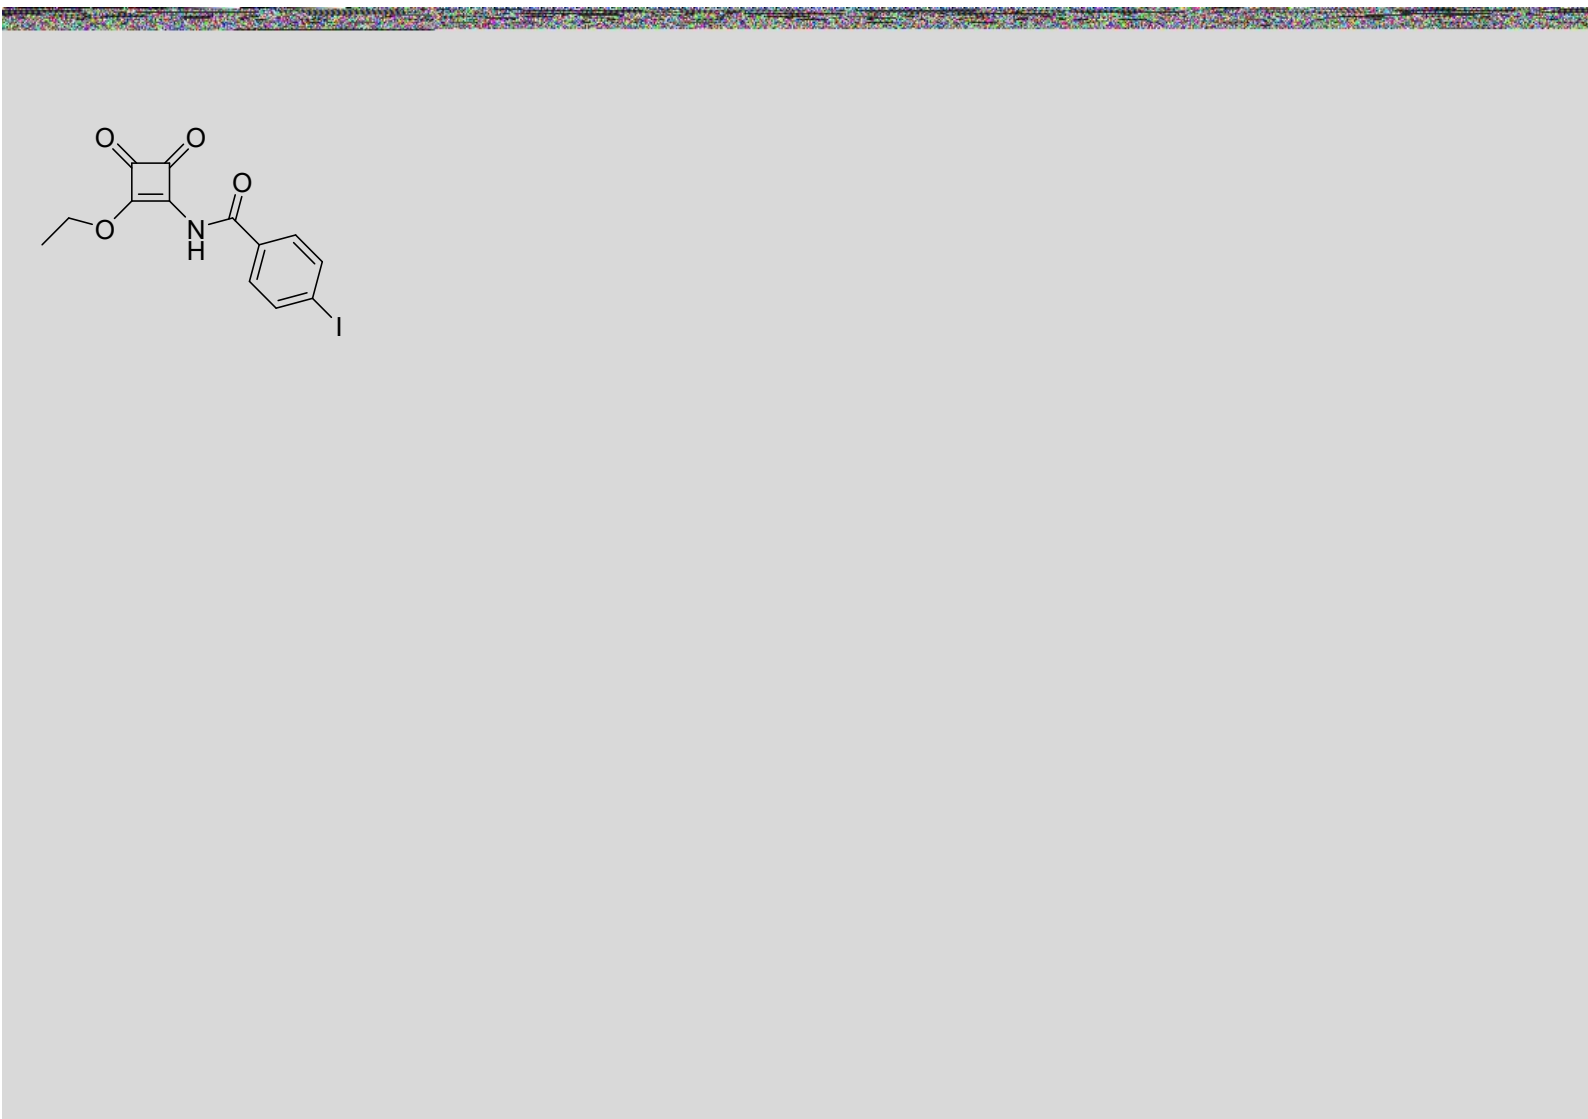

**Figure S29.**  $^1\text{H}$  NMR ( $\text{DMSO-}d_6$ , 500 MHz) spectrum of **16**.

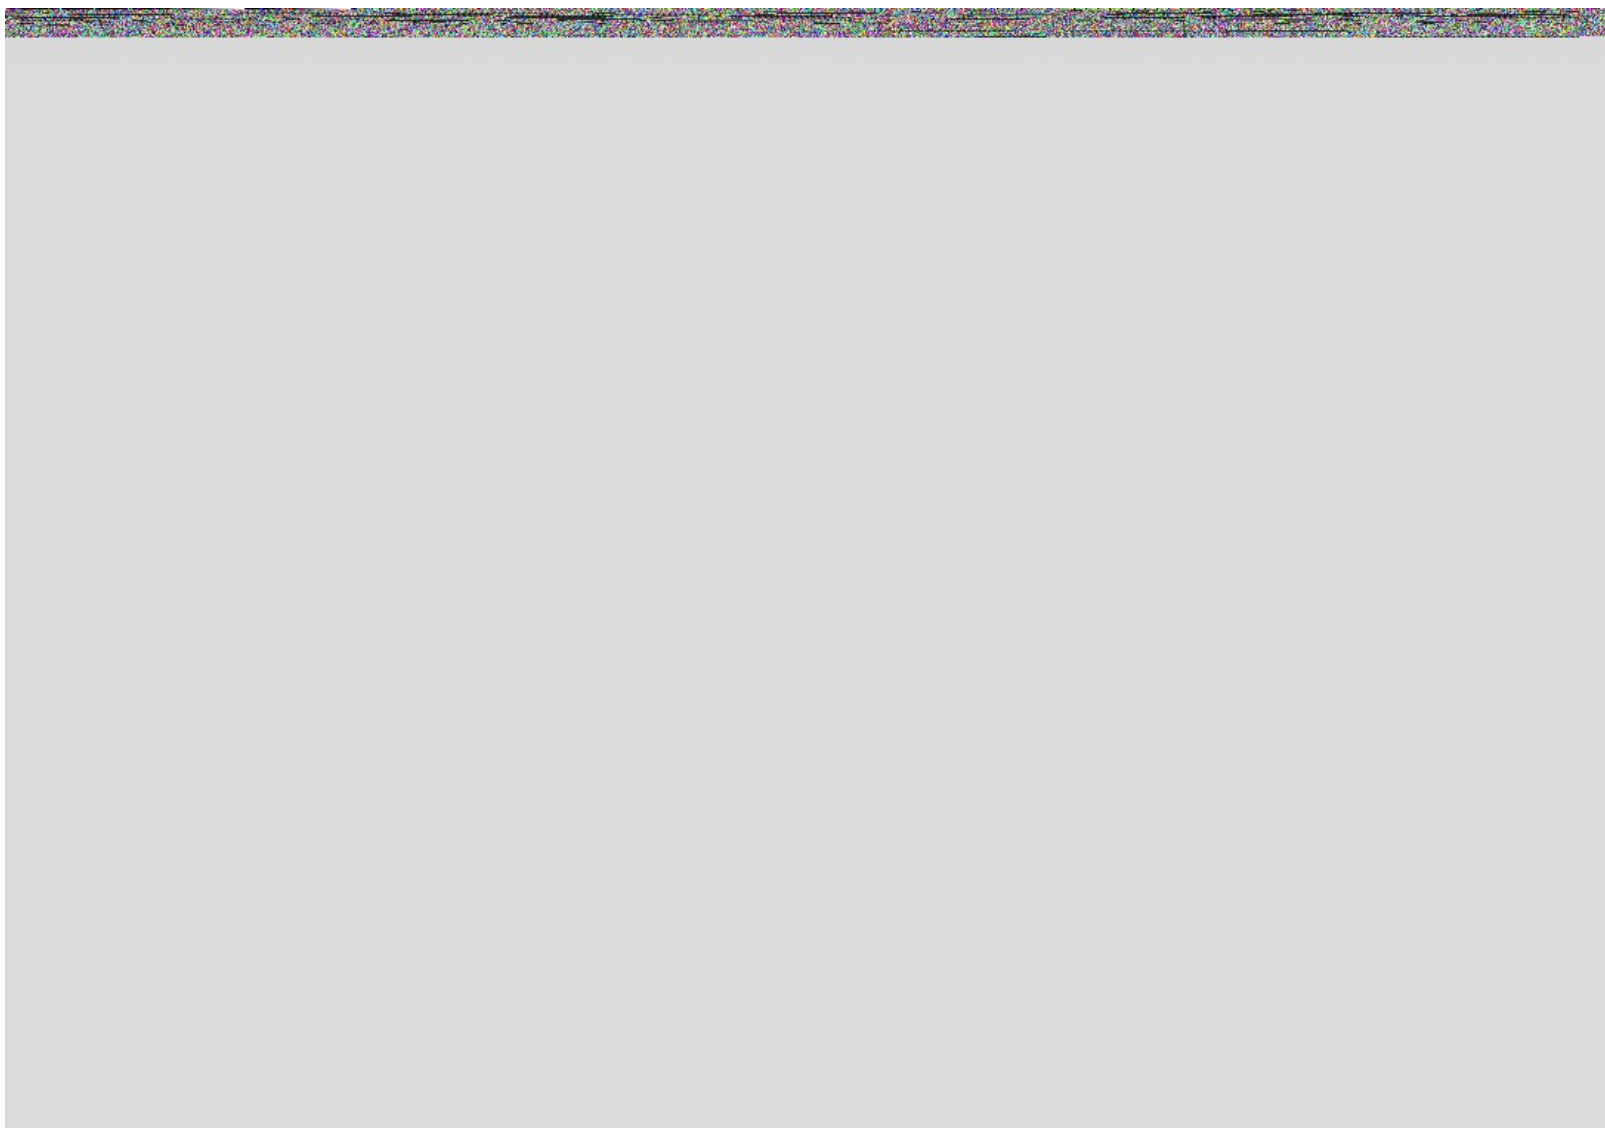

**Figure S30.**  $^{13}\text{C}$  NMR ( $\text{DMSO-}d_6$ , 126 MHz) spectrum of **16**.

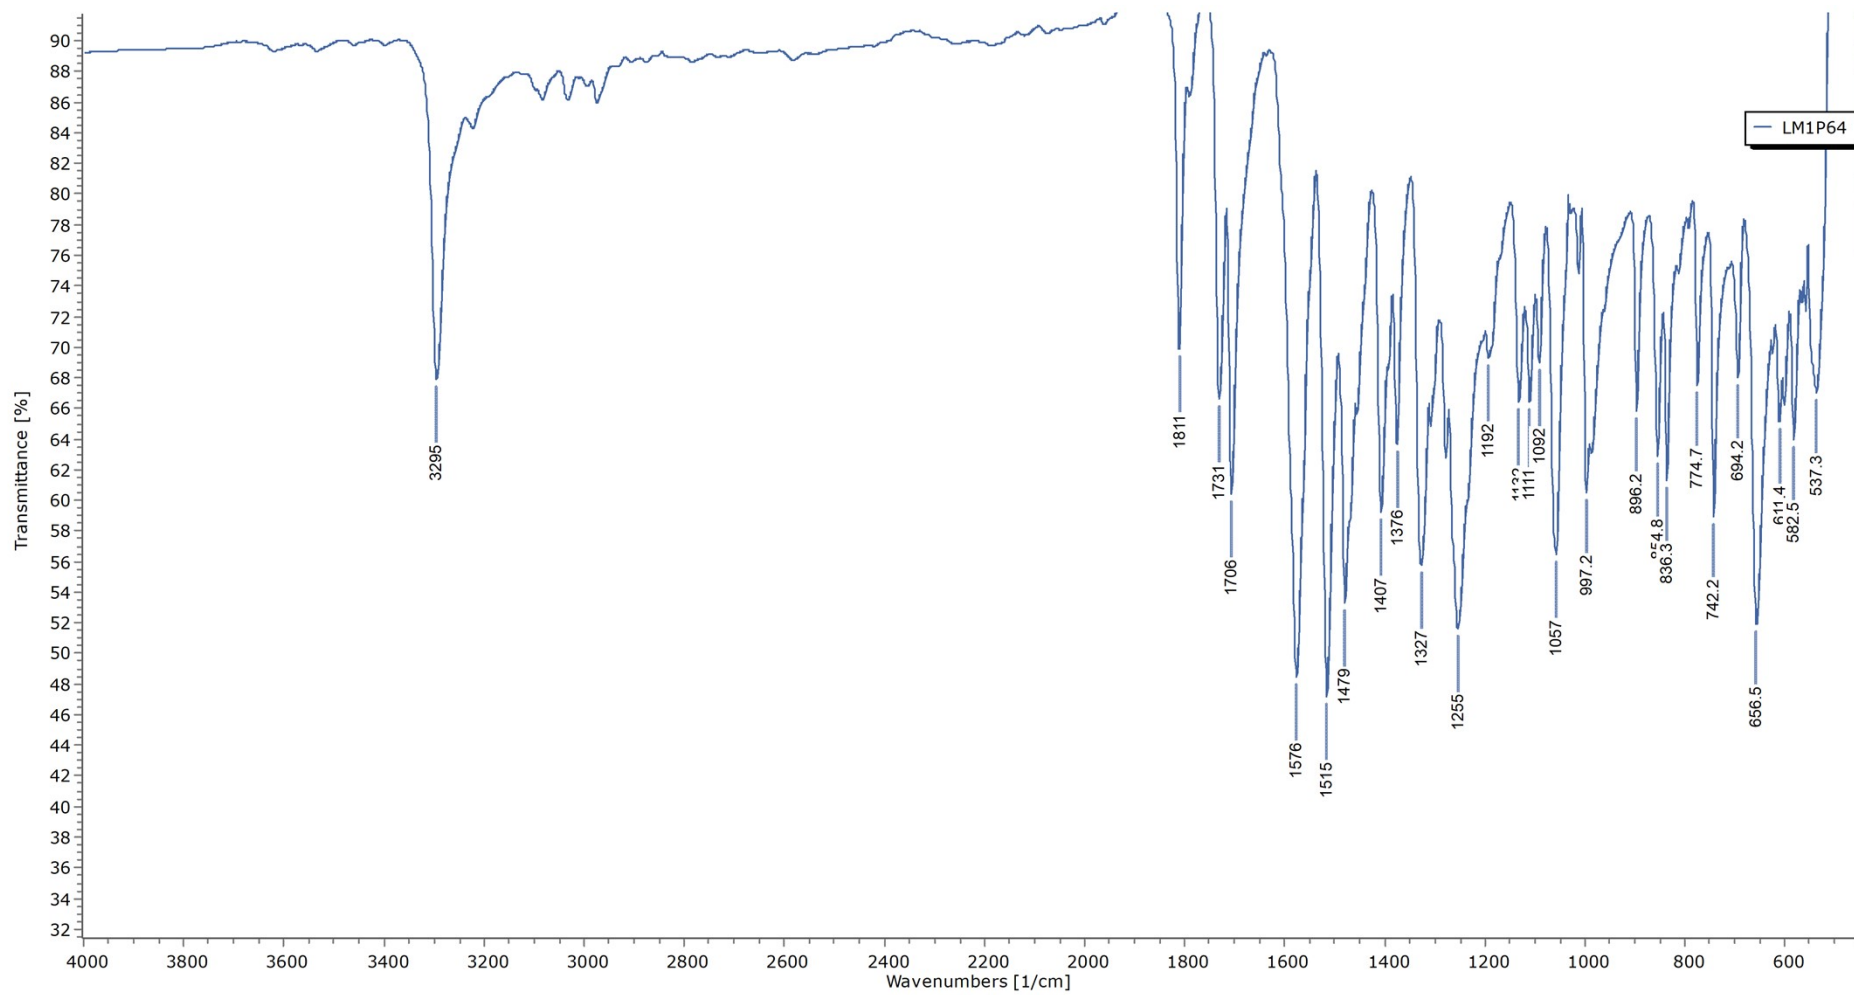

Figure S31. IR spectrum of 16.

### Compounds

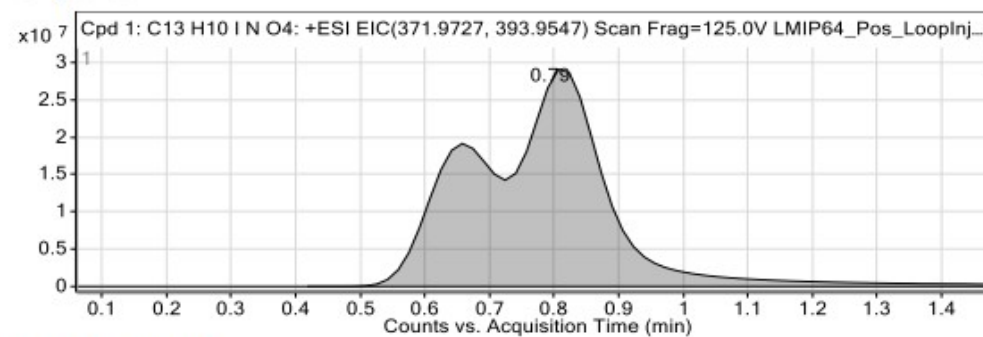

### Integration Peak List

| Start | RT   | End  | Height   | Area      |
|-------|------|------|----------|-----------|
| 0.42  | 0.79 | 1.47 | 27848282 | 399393219 |

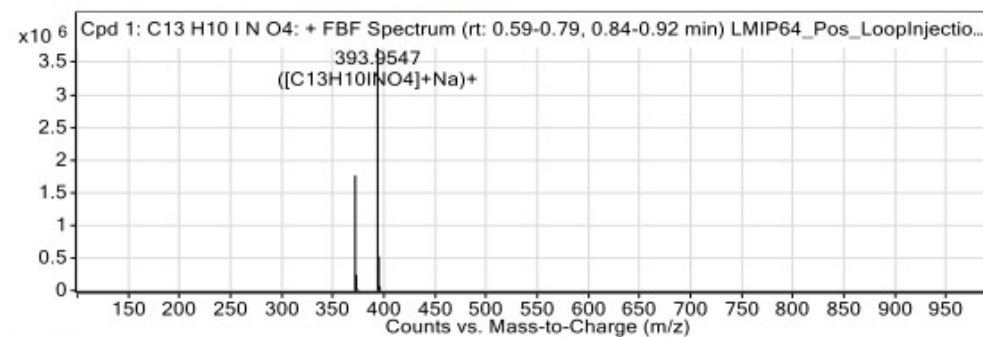

### Peak List

| m/z      | z | Abund      | Formula                                           | Ion                 |
|----------|---|------------|---------------------------------------------------|---------------------|
| 371.9727 | 1 | 1764381.38 | C <sub>13</sub> H <sub>10</sub> I NO <sub>4</sub> | (M+H) <sup>+</sup>  |
| 372.9758 | 1 | 242278.47  | C <sub>13</sub> H <sub>10</sub> I NO <sub>4</sub> | (M+H) <sup>+</sup>  |
| 373.9779 | 1 | 28882.52   | C <sub>13</sub> H <sub>10</sub> I NO <sub>4</sub> | (M+H) <sup>+</sup>  |
| 393.9547 | 1 | 3720356.25 | C <sub>13</sub> H <sub>10</sub> I NO <sub>4</sub> | (M+Na) <sup>+</sup> |
| 394.9579 | 1 | 522127.16  | C <sub>13</sub> H <sub>10</sub> I NO <sub>4</sub> | (M+Na) <sup>+</sup> |
| 395.96   | 1 | 66019.08   | C <sub>13</sub> H <sub>10</sub> I NO <sub>4</sub> | (M+Na) <sup>+</sup> |
| 396.9621 | 1 | 5653.62    | C <sub>13</sub> H <sub>10</sub> I NO <sub>4</sub> | (M+Na) <sup>+</sup> |

--- End Of Report ---

Figure S32. HRMS of 16.

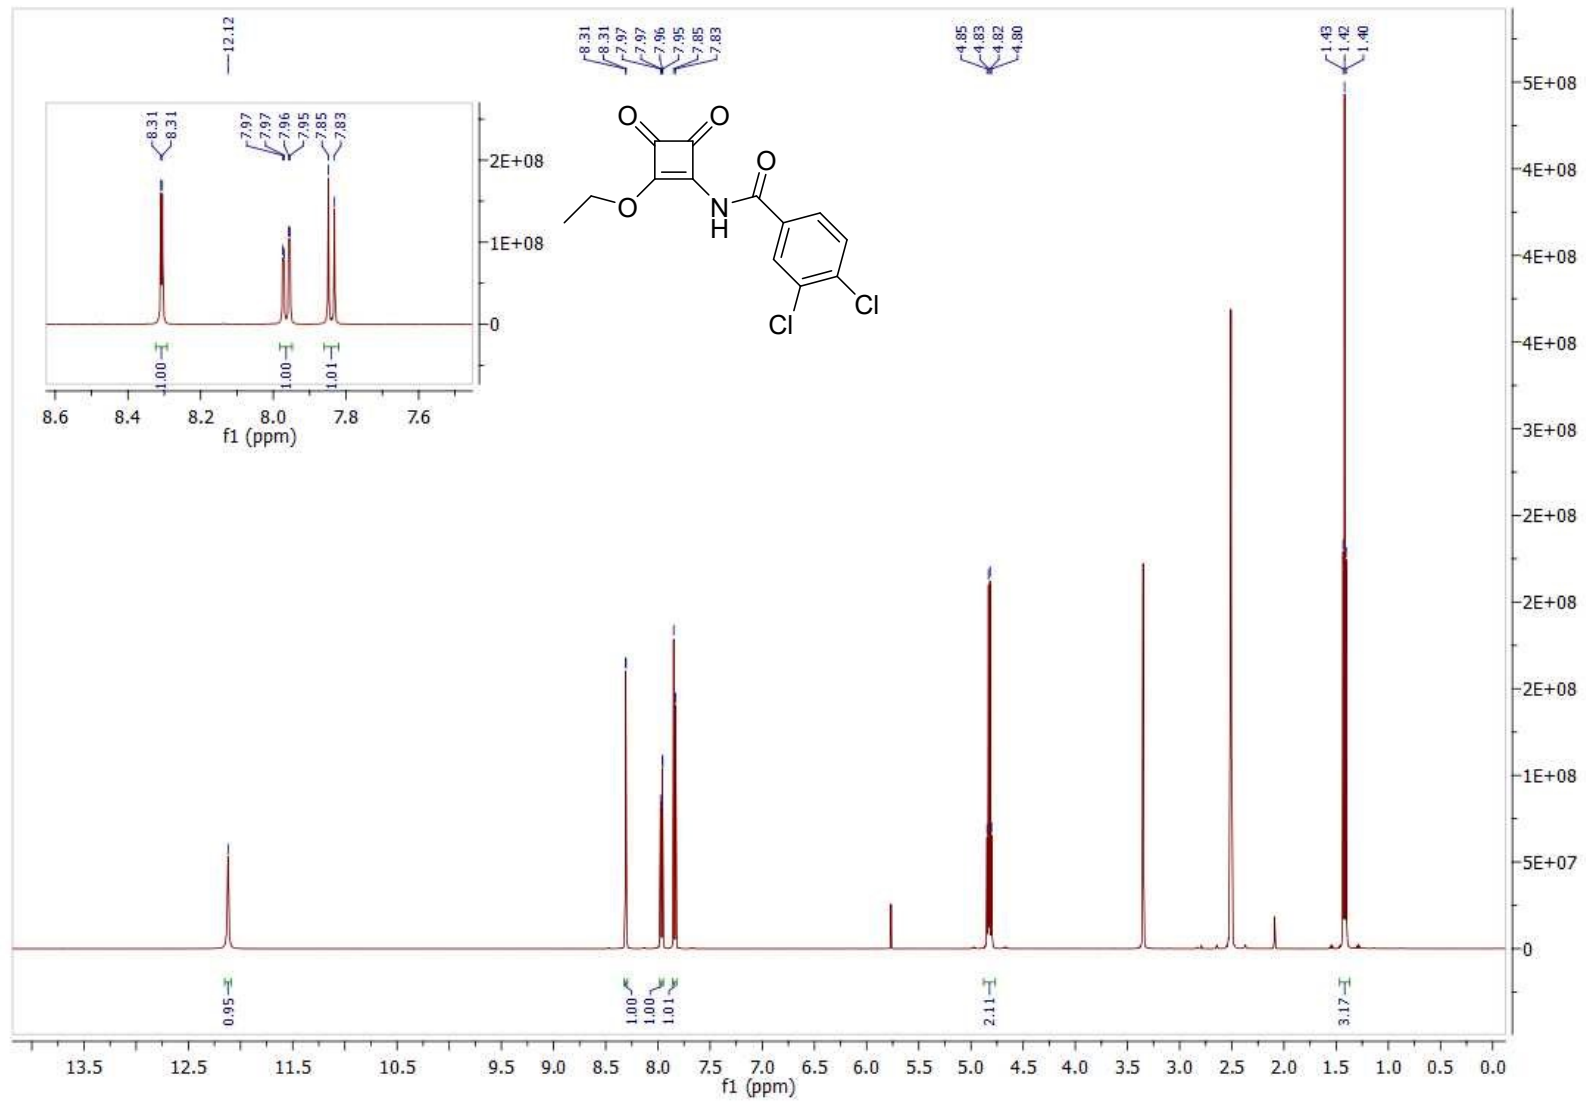

Figure S33.  $^1\text{H}$  NMR ( $\text{DMSO-}d_6$ , 500 MHz) spectrum of 17.

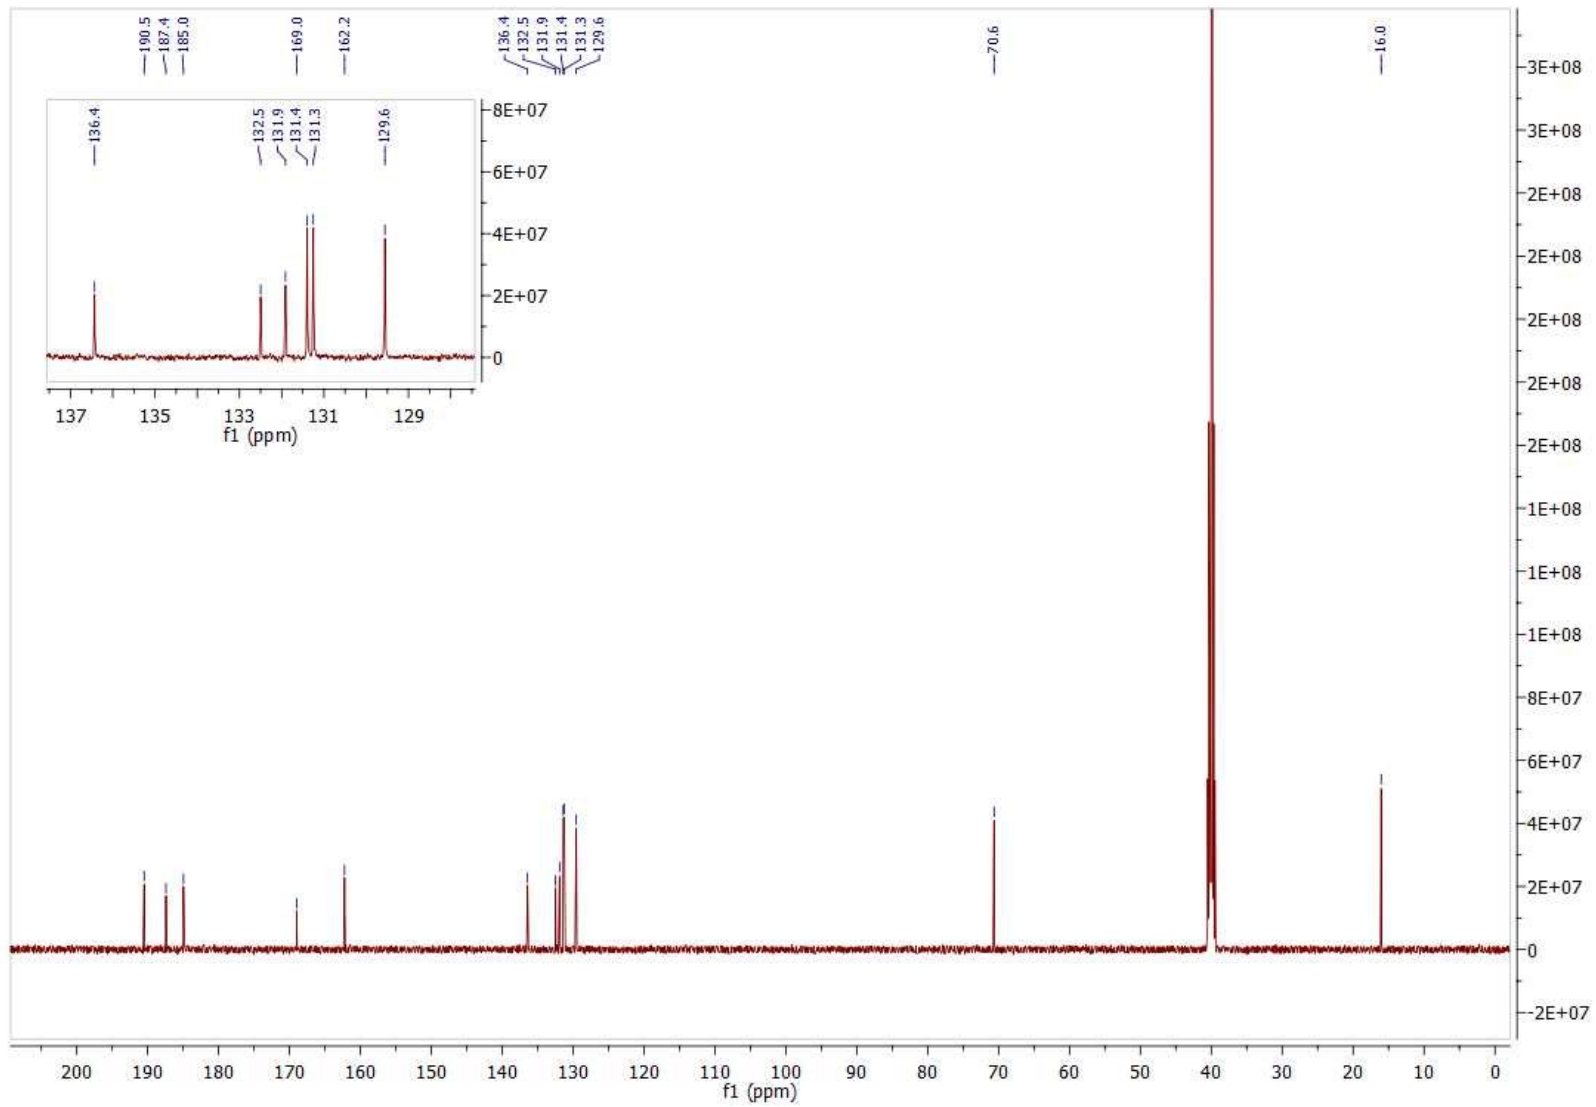

Figure S34. <sup>13</sup>C NMR (DMSO-d<sub>6</sub>, 126 MHz) spectrum of 17.

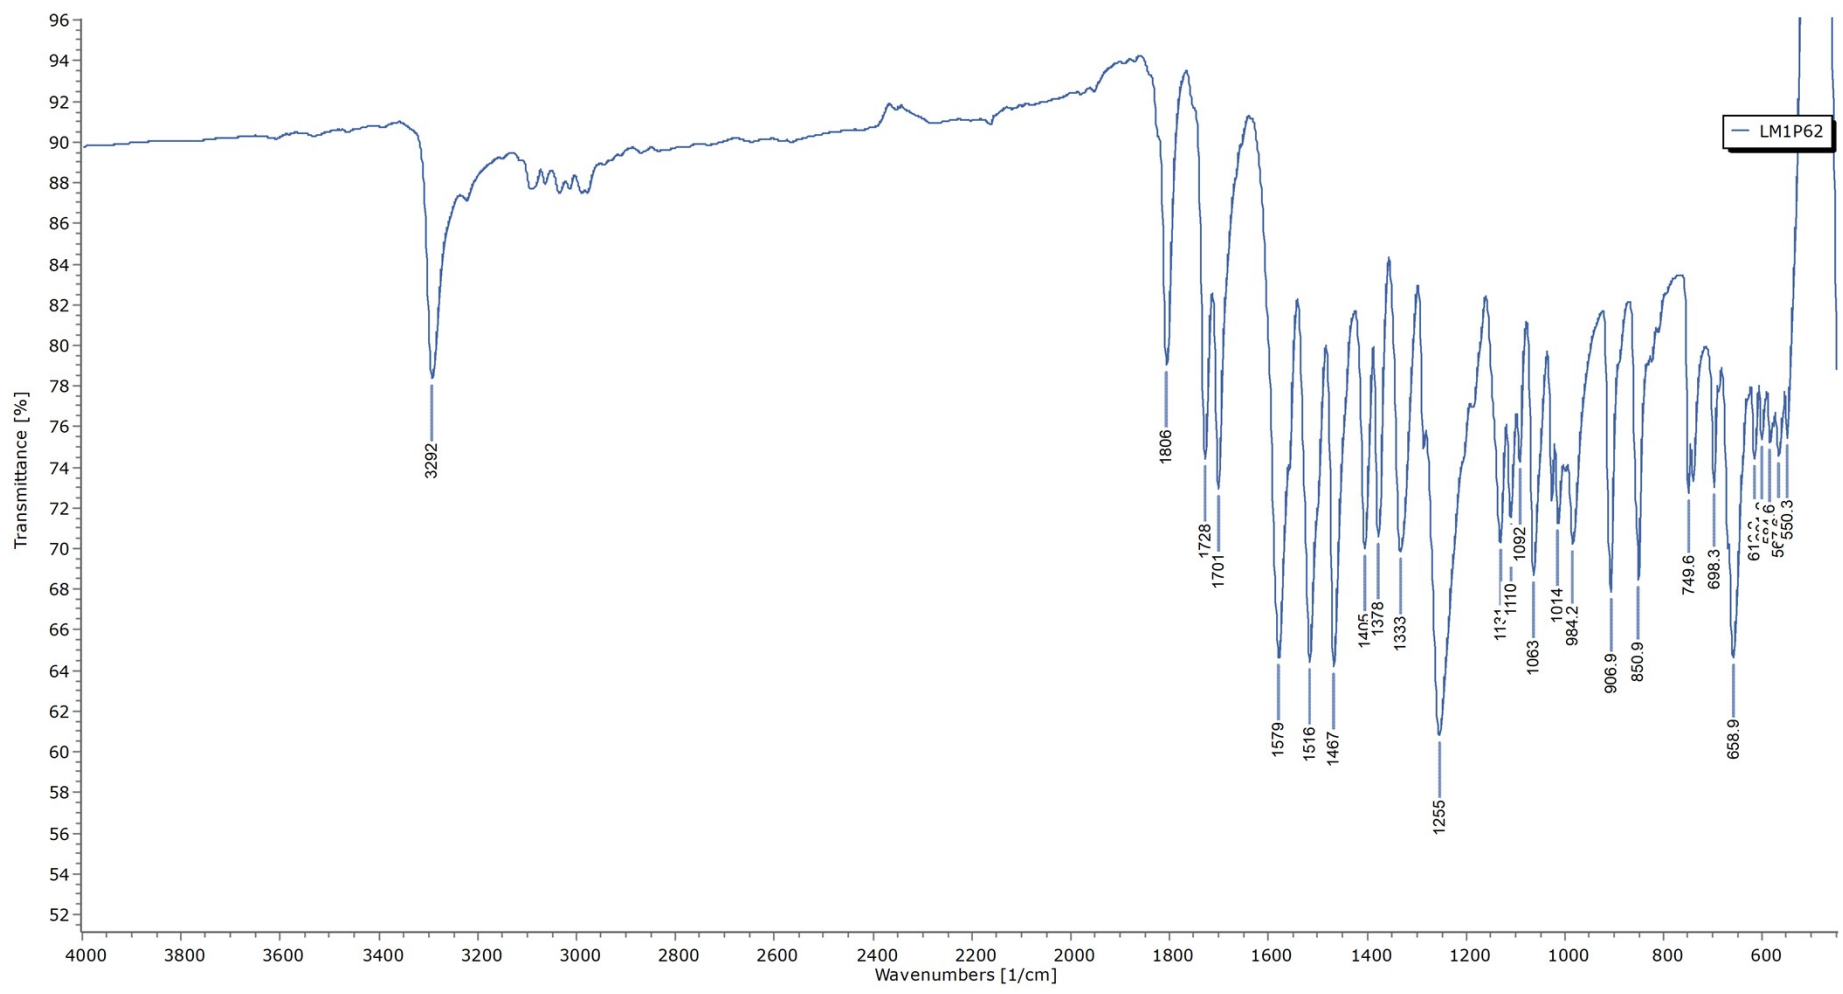

Figure S35. IR spectrum of 17.



### Compounds

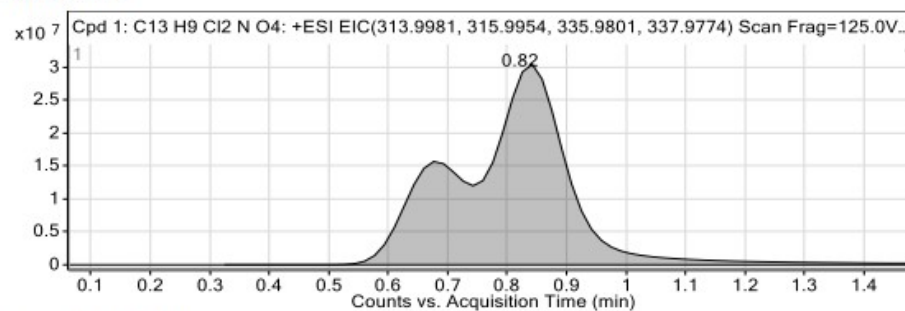

### Integration Peak List

| Start | RT   | End  | Height   | Area      |
|-------|------|------|----------|-----------|
| 0.32  | 0.82 | 1.47 | 26273803 | 367928171 |

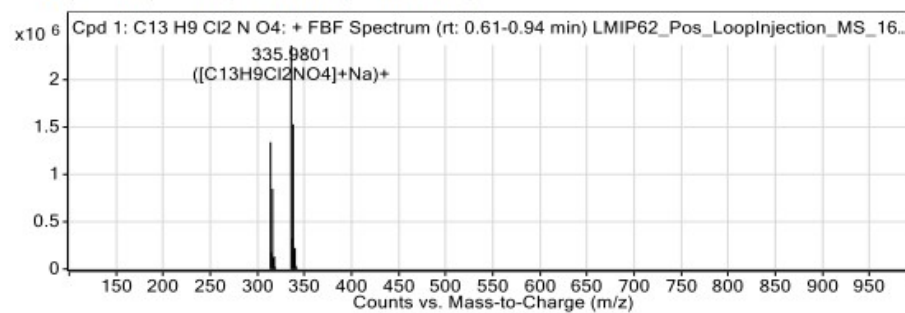

### Peak List

| m/z      | z | Abund      | Formula                                                                      | Ion                 |
|----------|---|------------|------------------------------------------------------------------------------|---------------------|
| 313.9982 | 1 | 1337021.75 | C <sub>13</sub> H <sub>9</sub> Cl <sub>2</sub> N <sub>2</sub> O <sub>4</sub> | (M+H) <sup>+</sup>  |
| 315.0014 | 1 | 176449.2   | C <sub>13</sub> H <sub>9</sub> Cl <sub>2</sub> N <sub>2</sub> O <sub>4</sub> | (M+H) <sup>+</sup>  |
| 315.9953 | 1 | 846996.31  | C <sub>13</sub> H <sub>9</sub> Cl <sub>2</sub> N <sub>2</sub> O <sub>4</sub> | (M+H) <sup>+</sup>  |
| 316.9993 | 1 | 116364.72  | C <sub>13</sub> H <sub>9</sub> Cl <sub>2</sub> N <sub>2</sub> O <sub>4</sub> | (M+H) <sup>+</sup>  |
| 317.9932 | 1 | 134404.78  | C <sub>13</sub> H <sub>9</sub> Cl <sub>2</sub> N <sub>2</sub> O <sub>4</sub> | (M+H) <sup>+</sup>  |
| 335.9801 | 1 | 2360401    | C <sub>13</sub> H <sub>9</sub> Cl <sub>2</sub> N <sub>2</sub> O <sub>4</sub> | (M+Na) <sup>+</sup> |
| 336.9834 | 1 | 323599.44  | C <sub>13</sub> H <sub>9</sub> Cl <sub>2</sub> N <sub>2</sub> O <sub>4</sub> | (M+Na) <sup>+</sup> |
| 337.9774 | 1 | 1525534.63 | C <sub>13</sub> H <sub>9</sub> Cl <sub>2</sub> N <sub>2</sub> O <sub>4</sub> | (M+Na) <sup>+</sup> |
| 338.9806 | 1 | 194775.28  | C <sub>13</sub> H <sub>9</sub> Cl <sub>2</sub> N <sub>2</sub> O <sub>4</sub> | (M+Na) <sup>+</sup> |
| 339.9752 | 1 | 222677.34  | C <sub>13</sub> H <sub>9</sub> Cl <sub>2</sub> N <sub>2</sub> O <sub>4</sub> | (M+Na) <sup>+</sup> |

--- End Of Report ---

Figure S36. HRMS of 17.

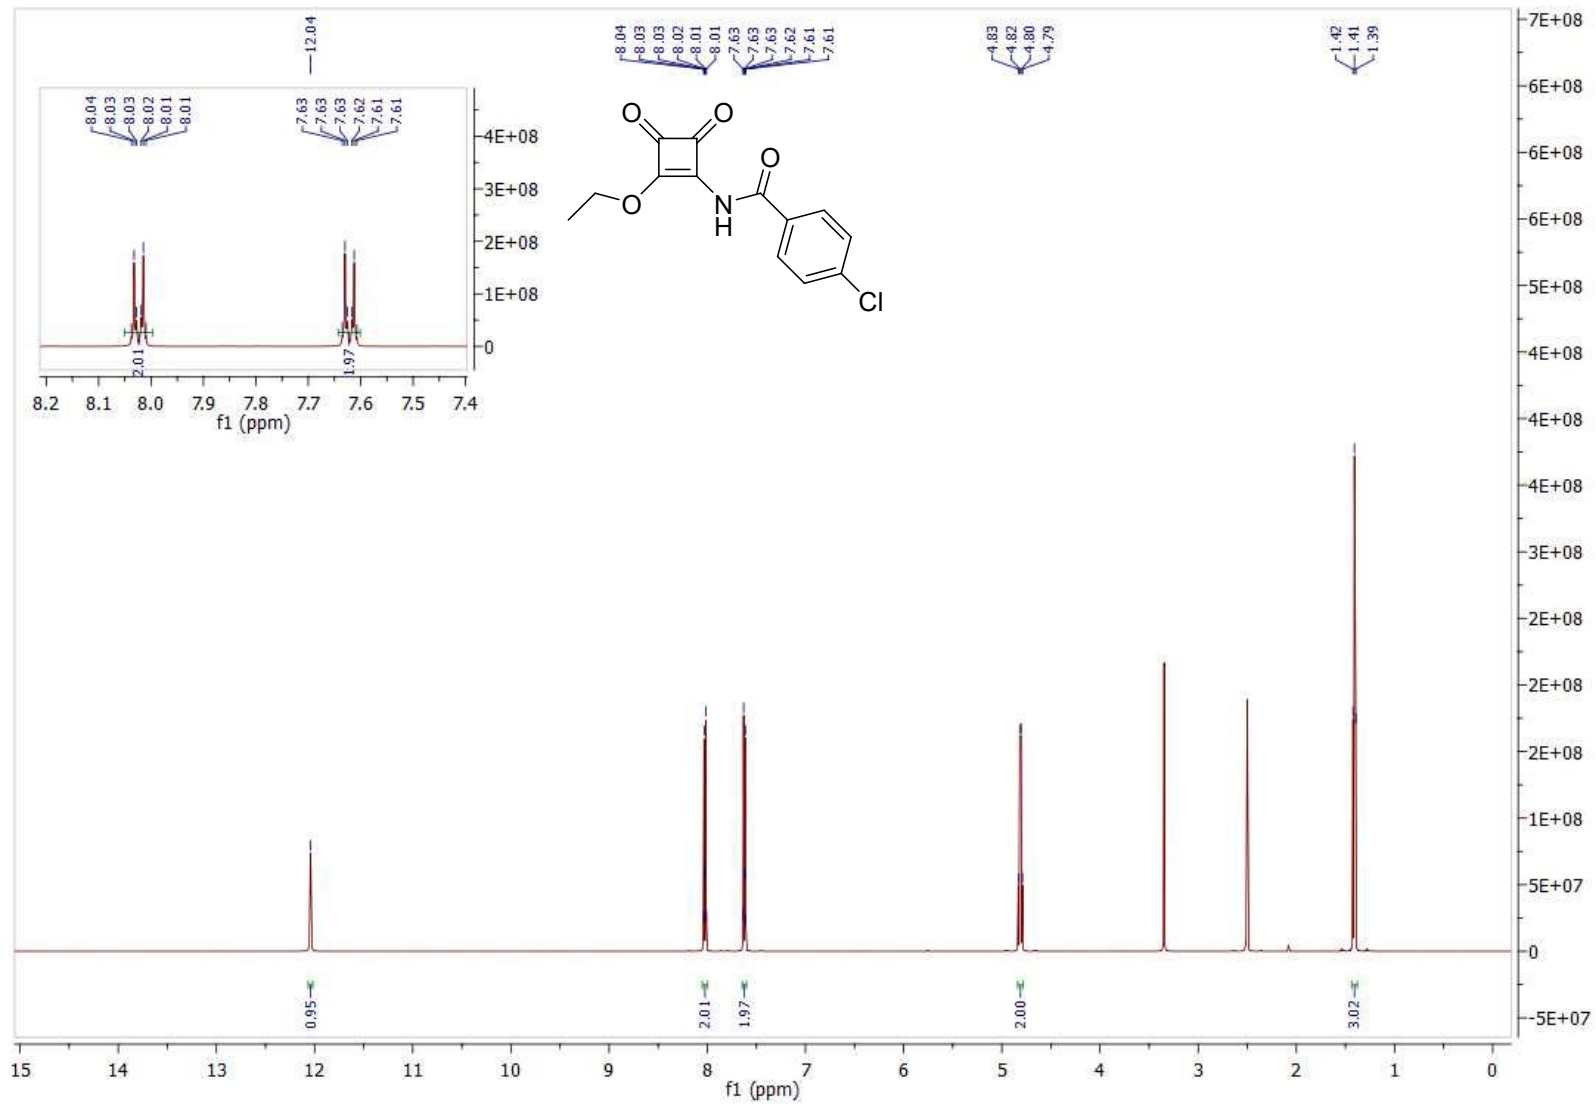

**Figure S37.**  $^1\text{H}$  NMR ( $\text{DMSO-d}_6$ , 500 MHz) spectrum of **18**.

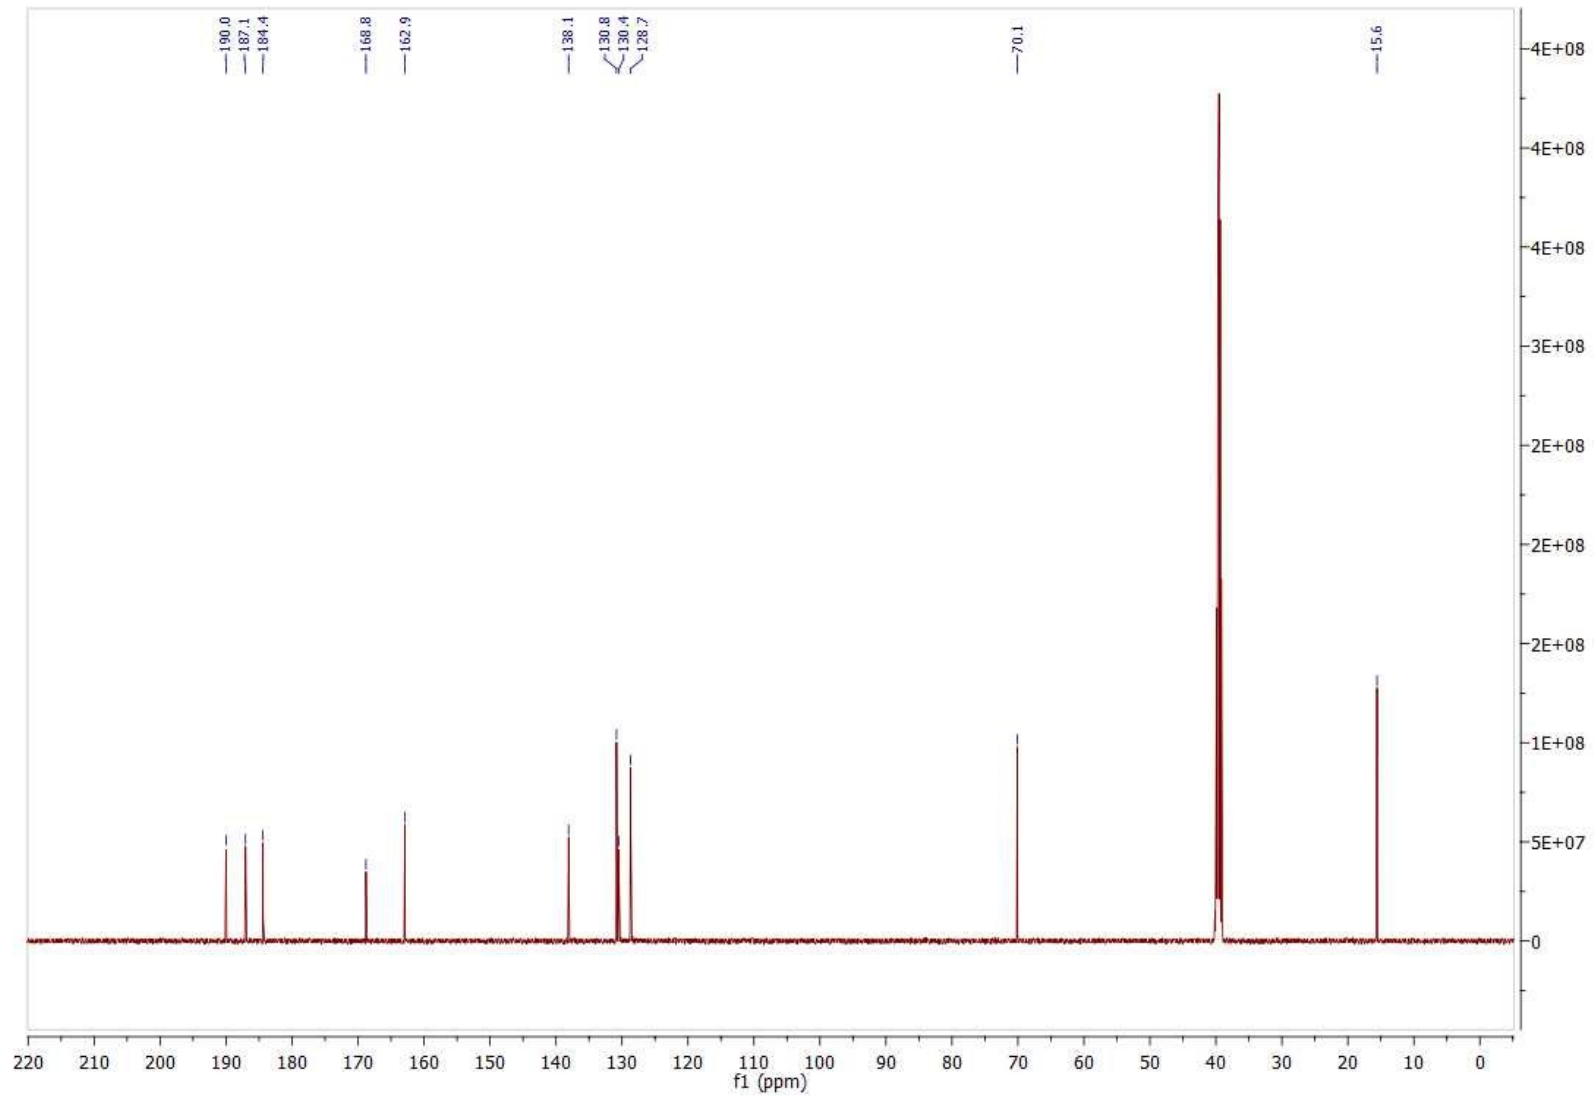

**Figure S38.**  $^{13}\text{C}$  NMR ( $\text{DMSO-}d_6$ , 126 MHz) spectrum of **18**.

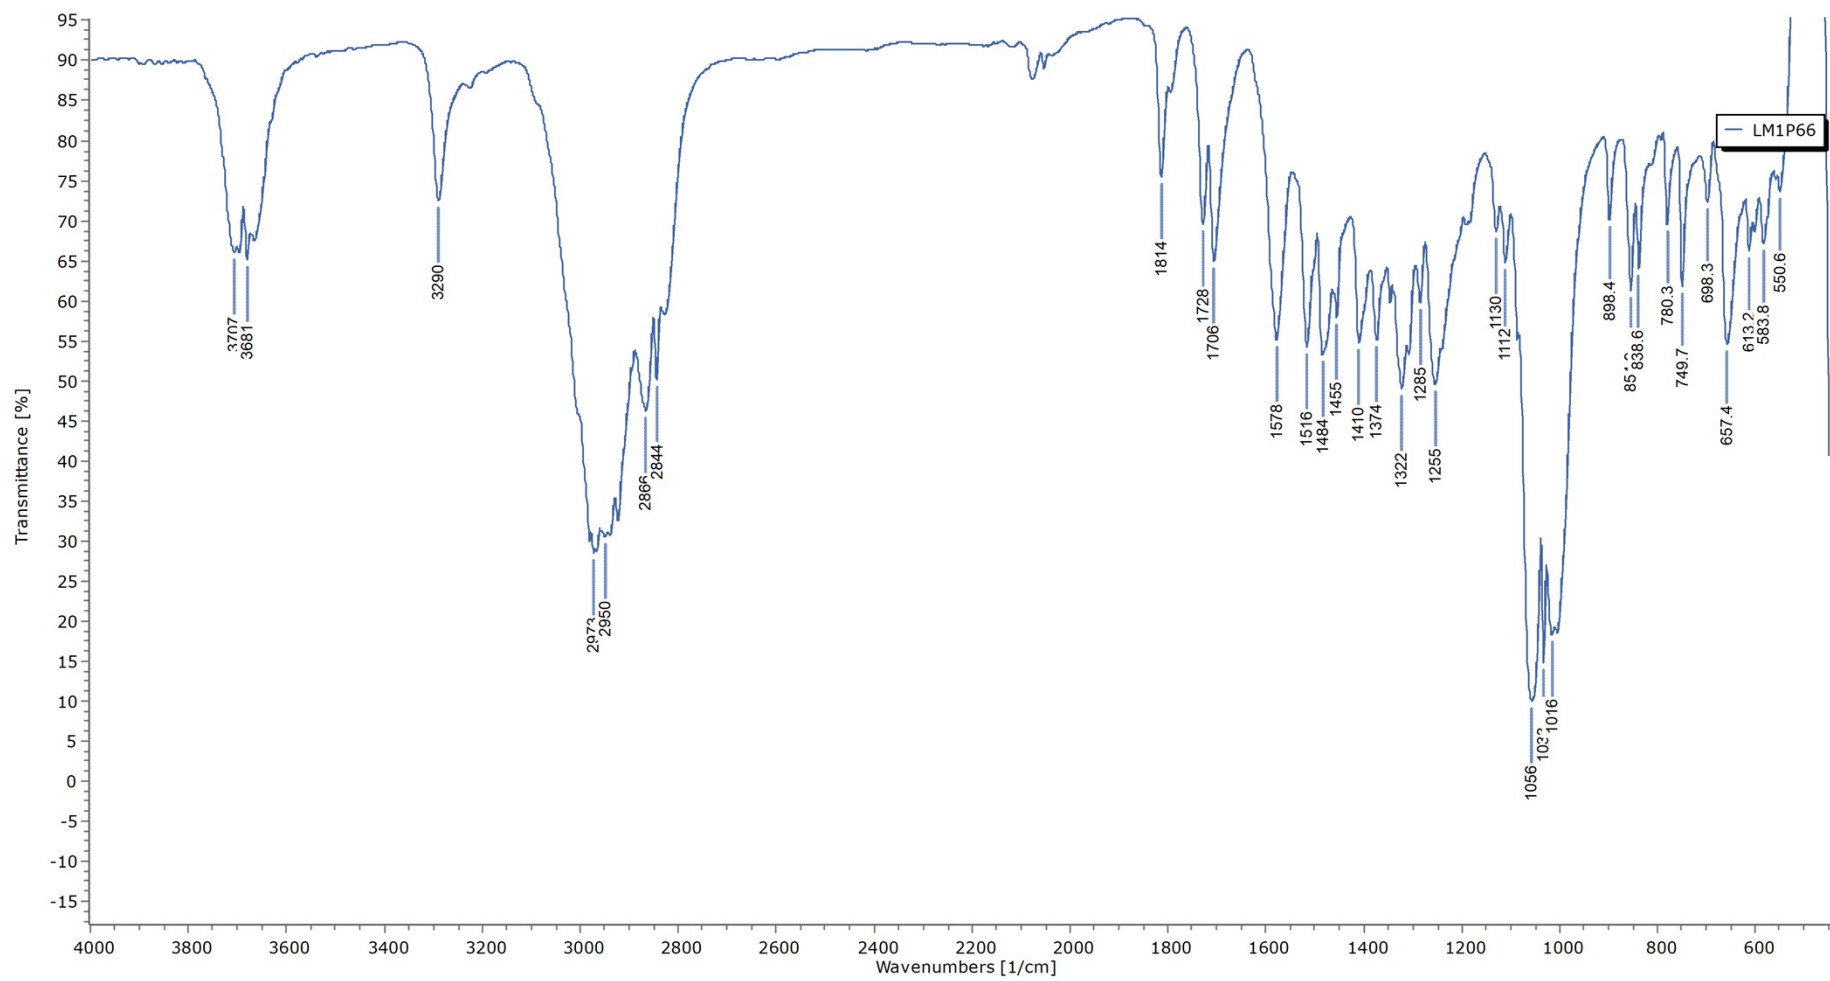

Figure S39. IR spectrum of 18.

### Compounds

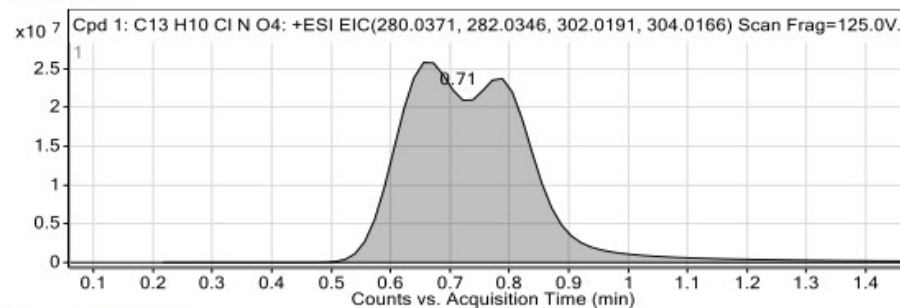

### Integration Peak List

| Start | RT   | End  | Height   | Area      |
|-------|------|------|----------|-----------|
| 0.22  | 0.71 | 1.47 | 25315312 | 386370120 |

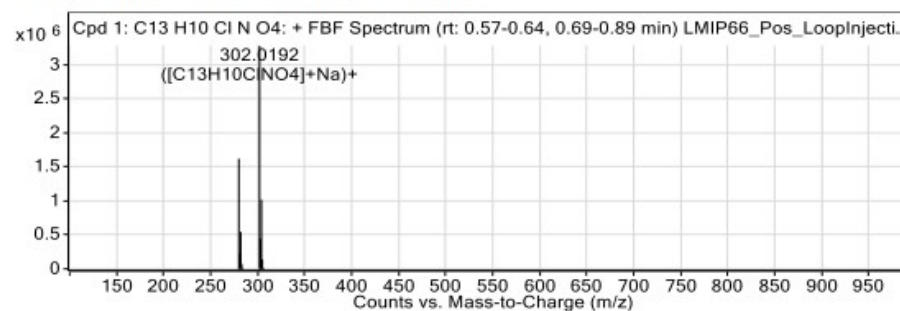

### Peak List

| m/z      | z | Abund      | Formula                                           | Ion                 |
|----------|---|------------|---------------------------------------------------|---------------------|
| 280.037  | 1 | 1620053    | C <sub>13</sub> H <sub>10</sub> ClNO <sub>4</sub> | (M+H) <sup>+</sup>  |
| 281.0405 | 1 | 228181.17  | C <sub>13</sub> H <sub>10</sub> ClNO <sub>4</sub> | (M+H) <sup>+</sup>  |
| 282.0346 | 1 | 543549.5   | C <sub>13</sub> H <sub>10</sub> ClNO <sub>4</sub> | (M+H) <sup>+</sup>  |
| 283.0382 | 1 | 73518.92   | C <sub>13</sub> H <sub>10</sub> ClNO <sub>4</sub> | (M+H) <sup>+</sup>  |
| 284.039  | 1 | 10691.38   | C <sub>13</sub> H <sub>10</sub> ClNO <sub>4</sub> | (M+H) <sup>+</sup>  |
| 302.0192 | 1 | 3282117.5  | C <sub>13</sub> H <sub>10</sub> ClNO <sub>4</sub> | (M+Na) <sup>+</sup> |
| 303.0224 | 1 | 444767.75  | C <sub>13</sub> H <sub>10</sub> ClNO <sub>4</sub> | (M+Na) <sup>+</sup> |
| 304.0164 | 1 | 1017450.31 | C <sub>13</sub> H <sub>10</sub> ClNO <sub>4</sub> | (M+Na) <sup>+</sup> |
| 305.0197 | 1 | 139950.11  | C <sub>13</sub> H <sub>10</sub> ClNO <sub>4</sub> | (M+Na) <sup>+</sup> |
| 306.0213 | 1 | 17136.4    | C <sub>13</sub> H <sub>10</sub> ClNO <sub>4</sub> | (M+Na) <sup>+</sup> |

--- End Of Report ---

Figure S40. HRMS of 18.

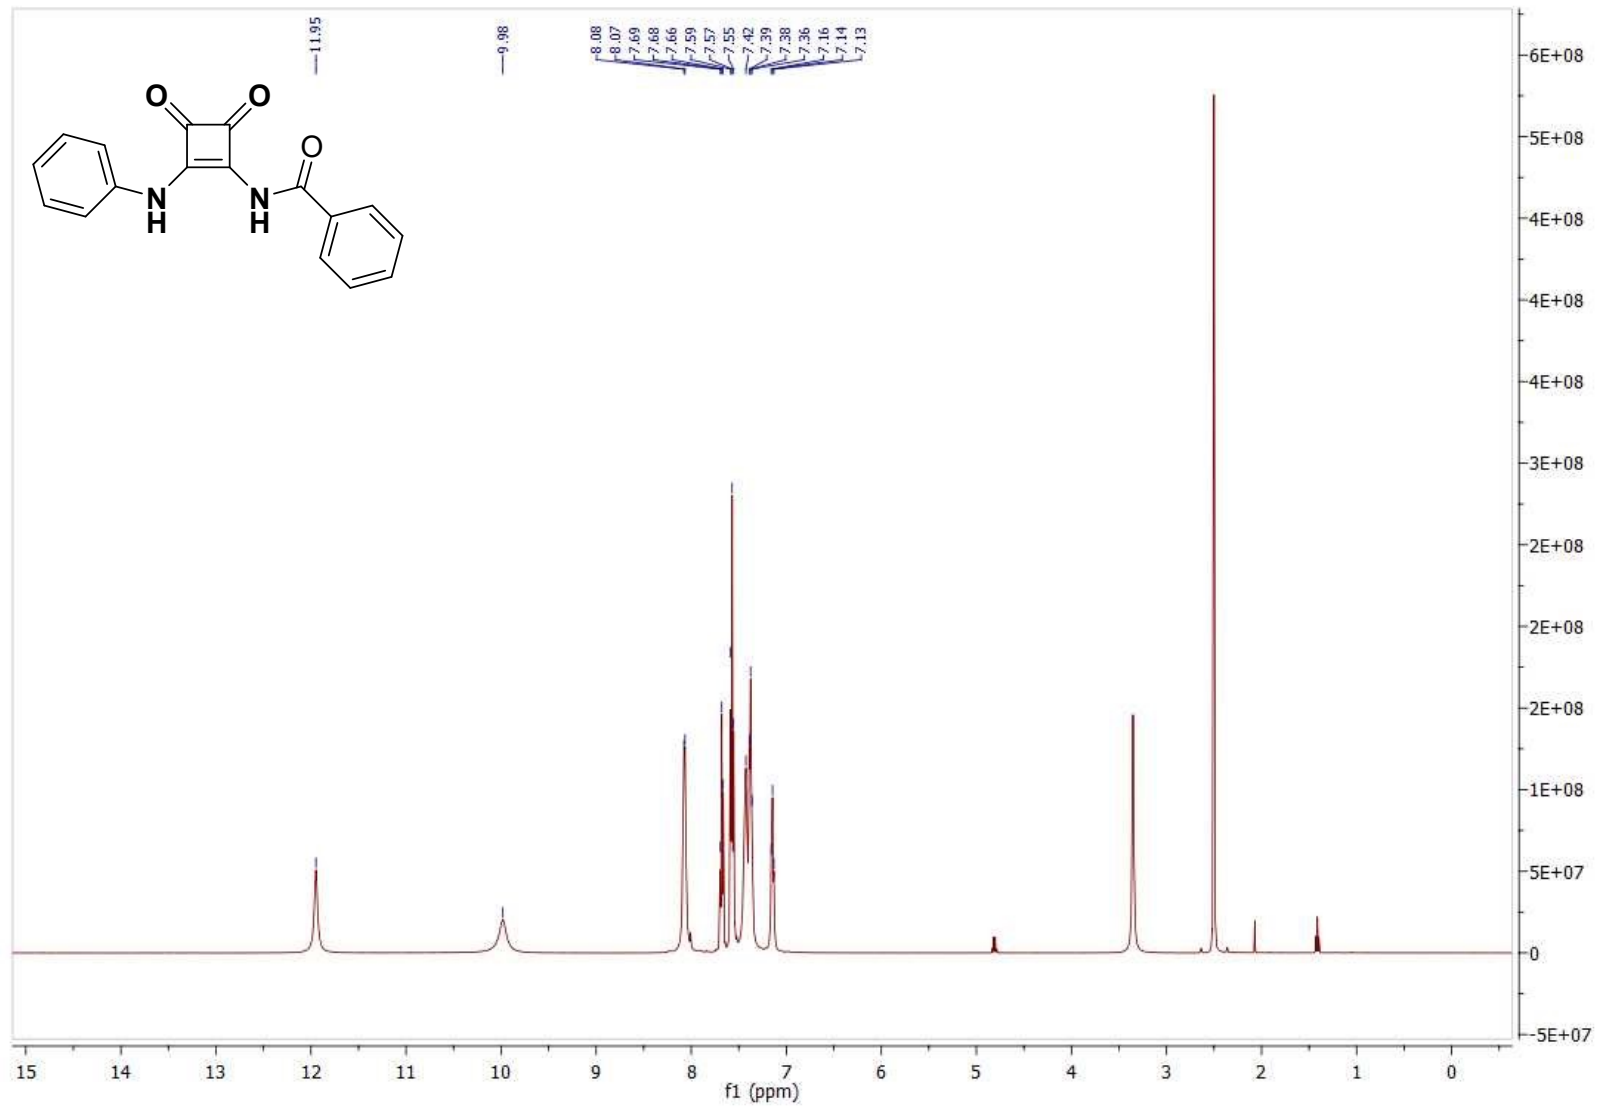

**Figure S41.**  $^1\text{H}$  NMR ( $\text{DMSO-}d_6$ , 500 MHz) spectrum of **1**.

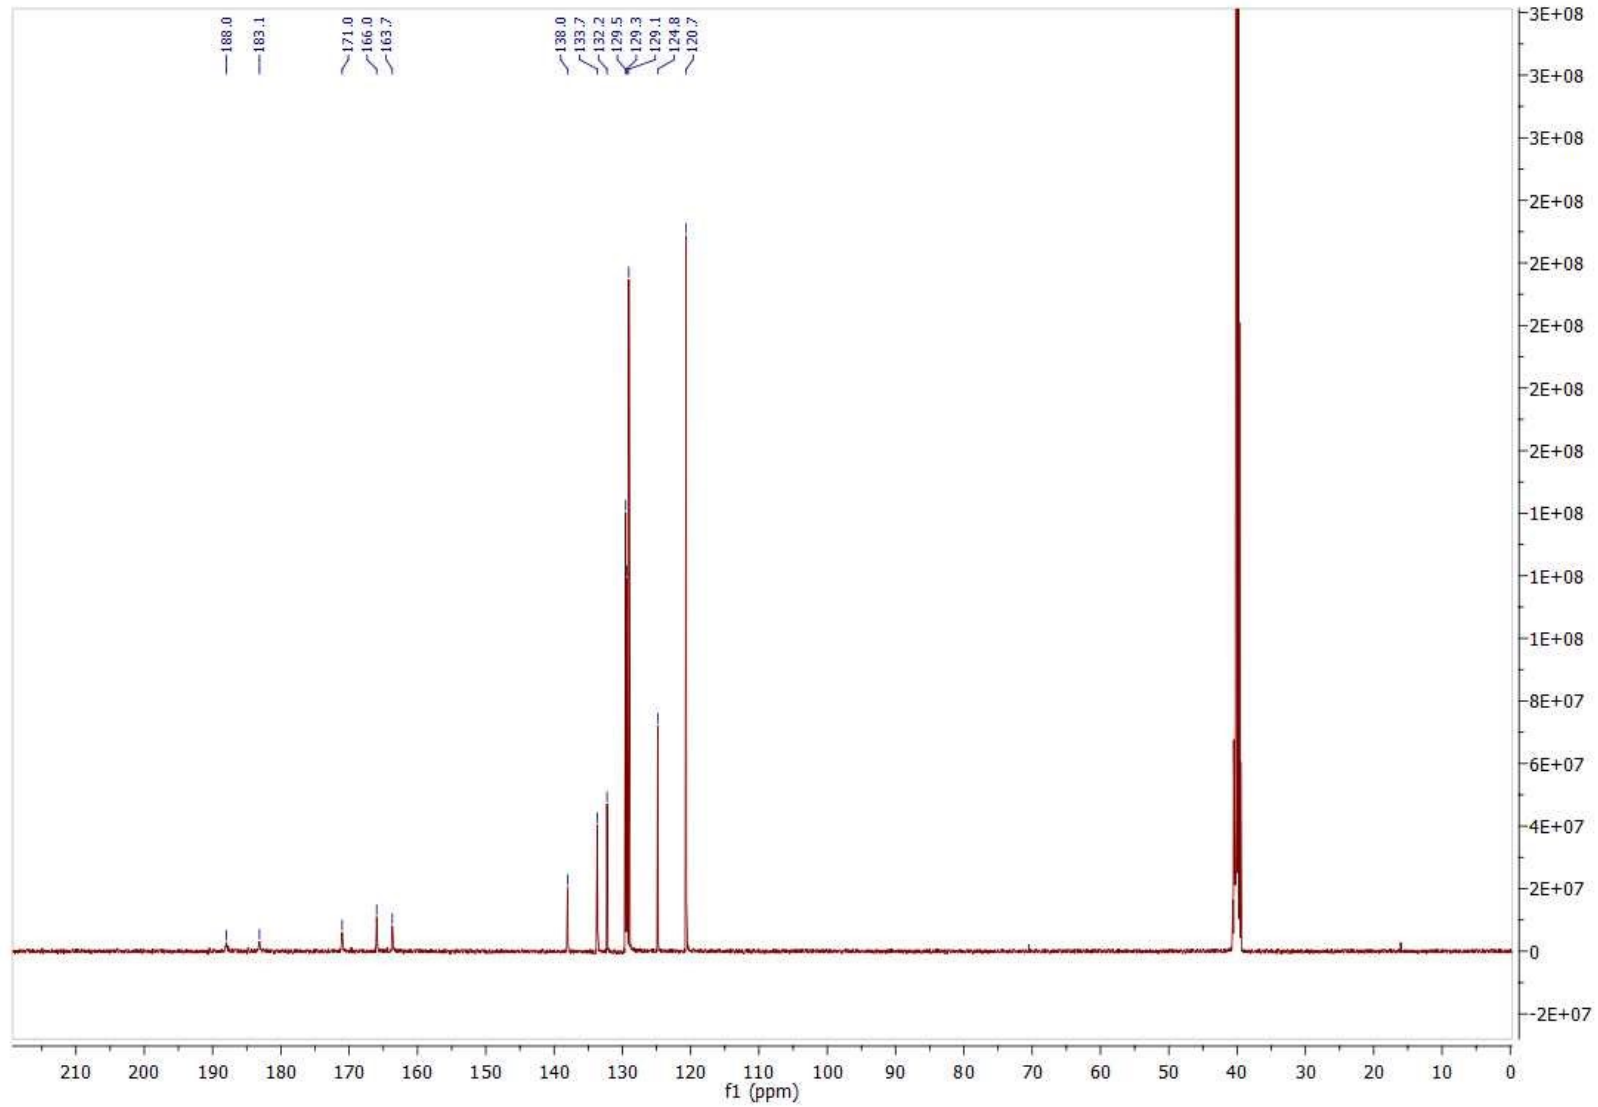

**Figure S42.**  $^{13}\text{C}$  NMR ( $\text{DMSO-}d_6$ , 126 MHz) spectrum of **1**.

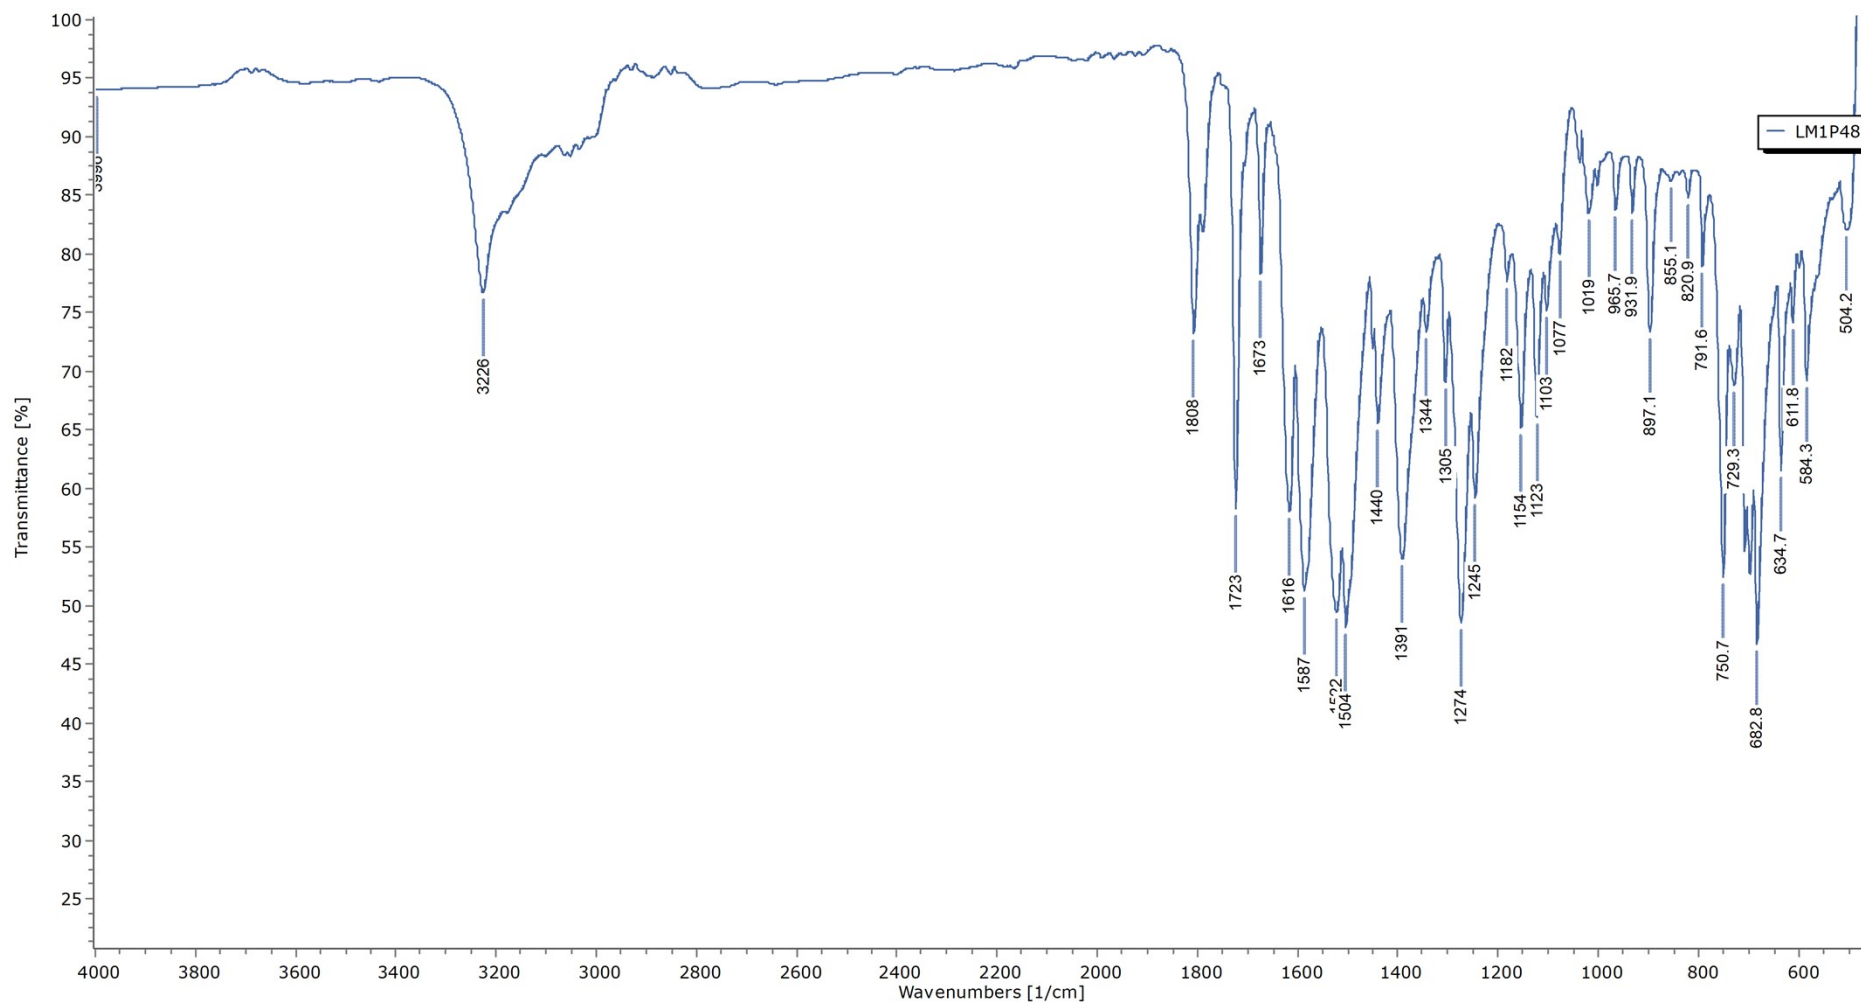

**Figure S43.** IR spectrum of **1**.



**Compounds**

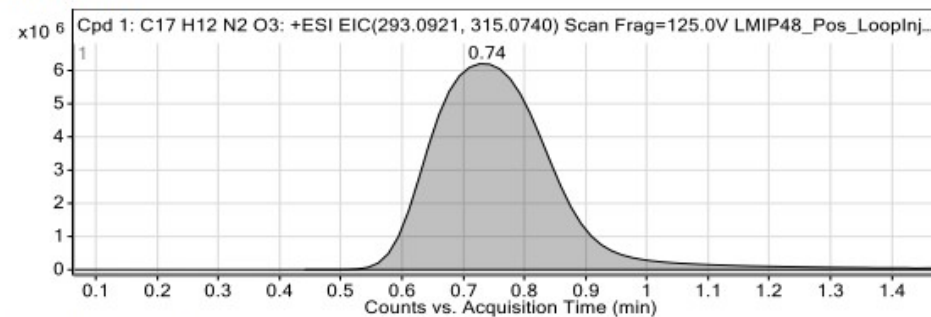

**Integration Peak List**

| Start | RT   | End  | Height  | Area     |
|-------|------|------|---------|----------|
| 0.44  | 0.74 | 1.47 | 6065743 | 84953217 |

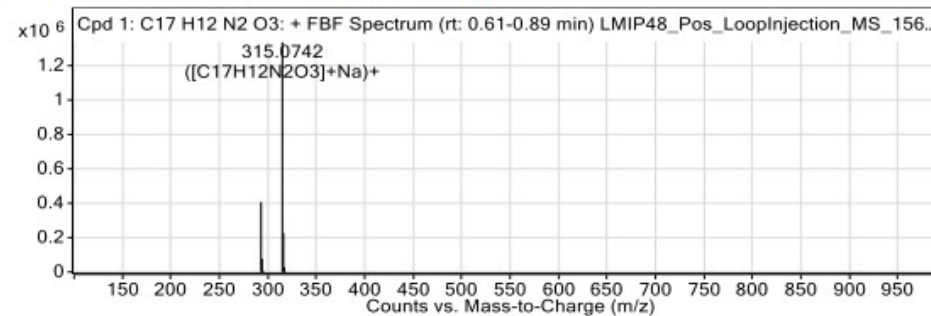

**Peak List**

| m/z      | z | Abund      | Formula    | Ion     |
|----------|---|------------|------------|---------|
| 293.0926 | 1 | 407026.53  | C17H12N2O3 | (M+H)+  |
| 294.0955 | 1 | 76758.41   | C17H12N2O3 | (M+H)+  |
| 295.0992 | 1 | 9511.4     | C17H12N2O3 | (M+H)+  |
| 296.1039 | 1 | 895.61     | C17H12N2O3 | (M+H)+  |
| 315.0742 | 1 | 1339016.38 | C17H12N2O3 | (M+Na)+ |
| 316.0776 | 1 | 226085.53  | C17H12N2O3 | (M+Na)+ |
| 317.0805 | 1 | 27438.29   | C17H12N2O3 | (M+Na)+ |
| 318.0829 | 1 | 2875.02    | C17H12N2O3 | (M+Na)+ |

--- End Of Report ---

**Figure S44.** HRMS of 1.

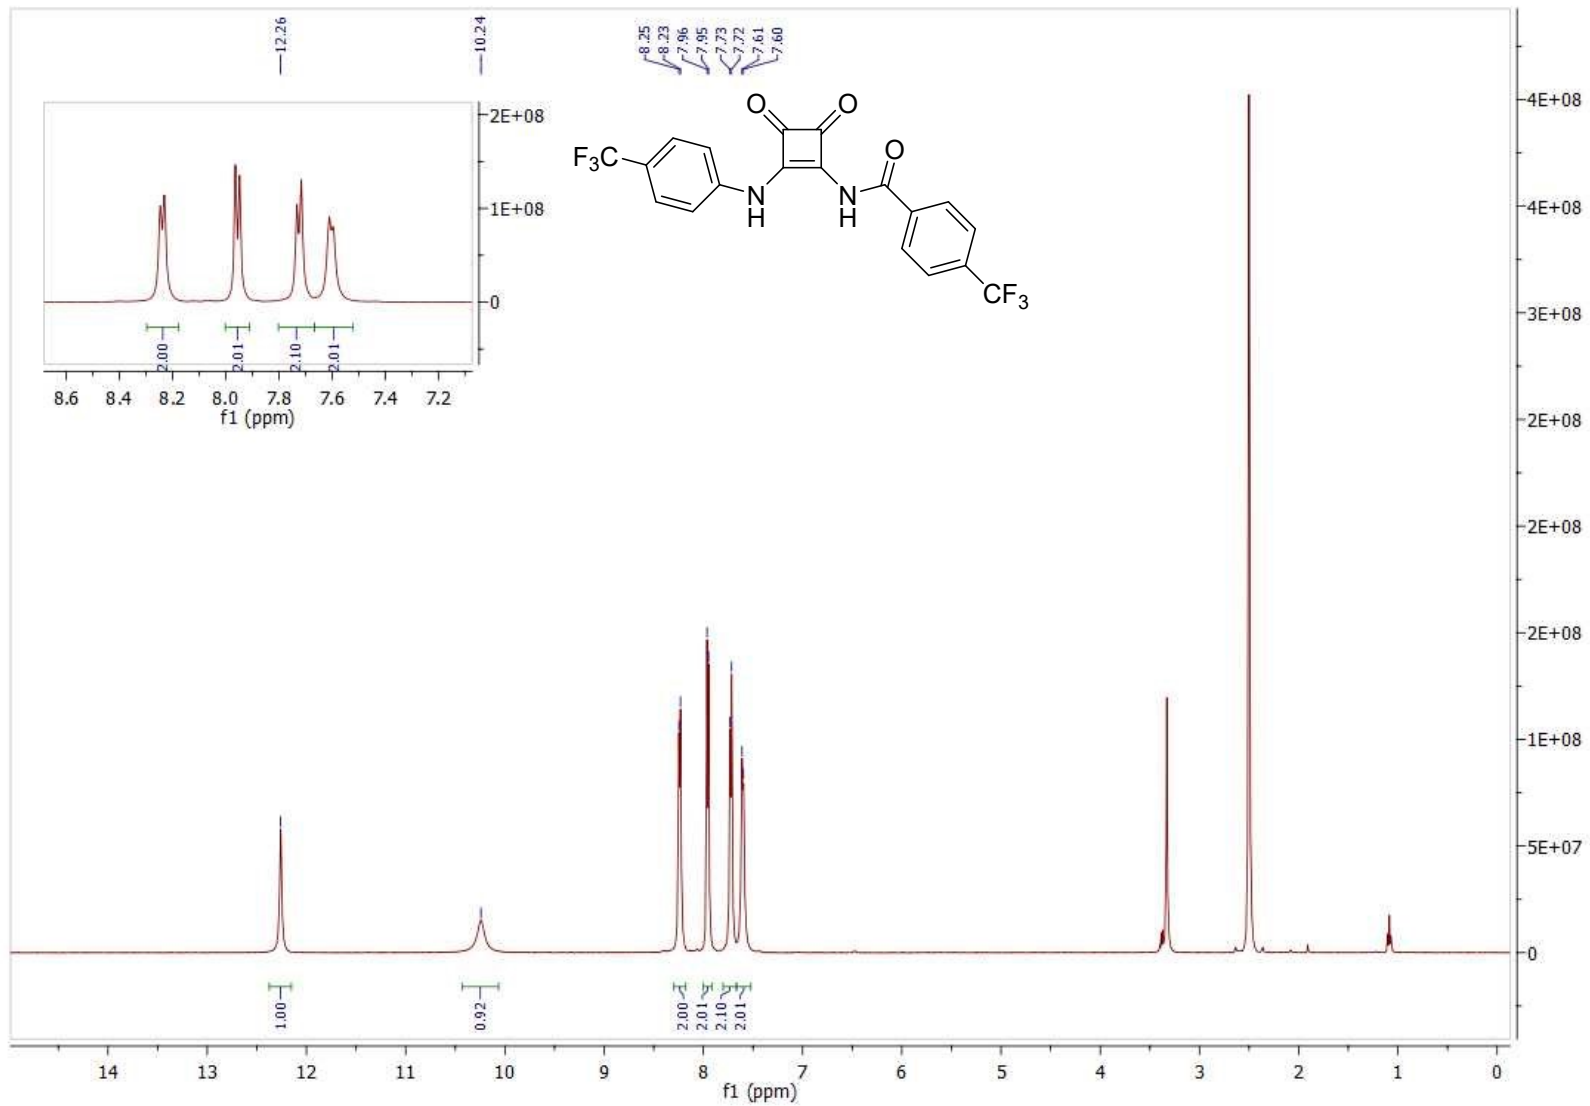

**Figure S45.**  $^1\text{H}$  NMR ( $\text{DMSO-d}_6$ , 500 MHz) spectrum of **2**.

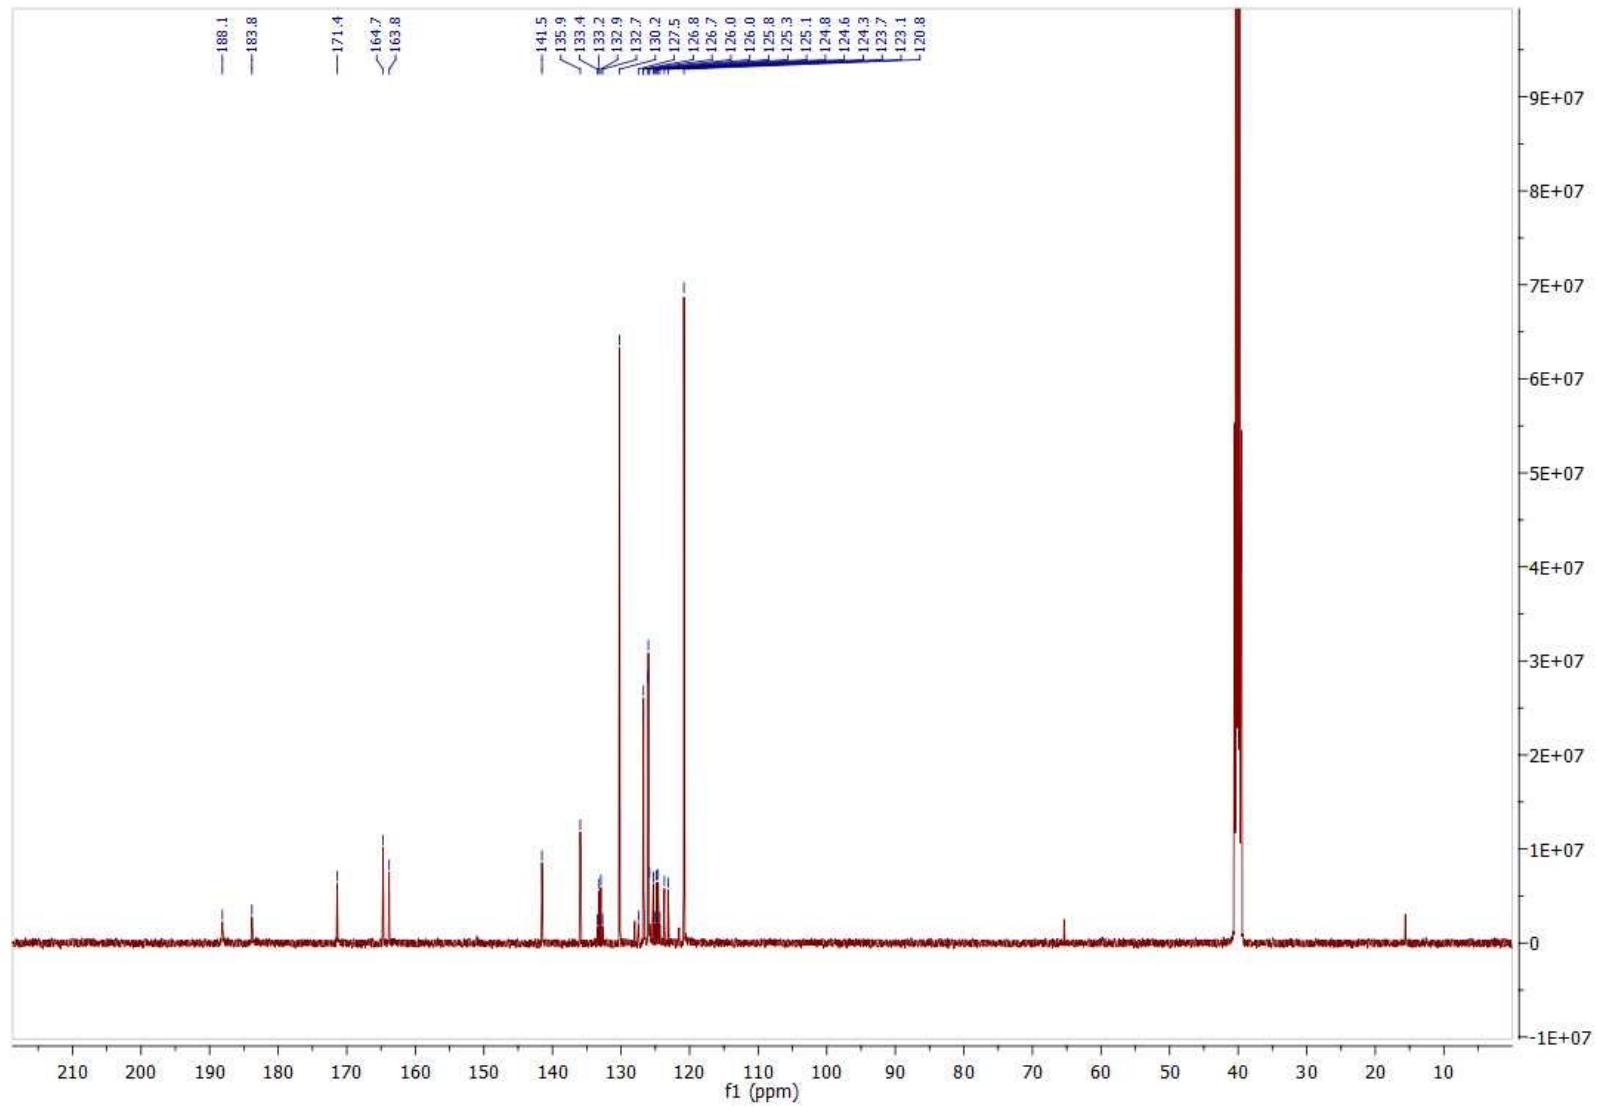

Figure S46.  $^{13}\text{C}$  NMR ( $\text{DMSO-}d_6$ , 126 MHz) spectrum of **2**.

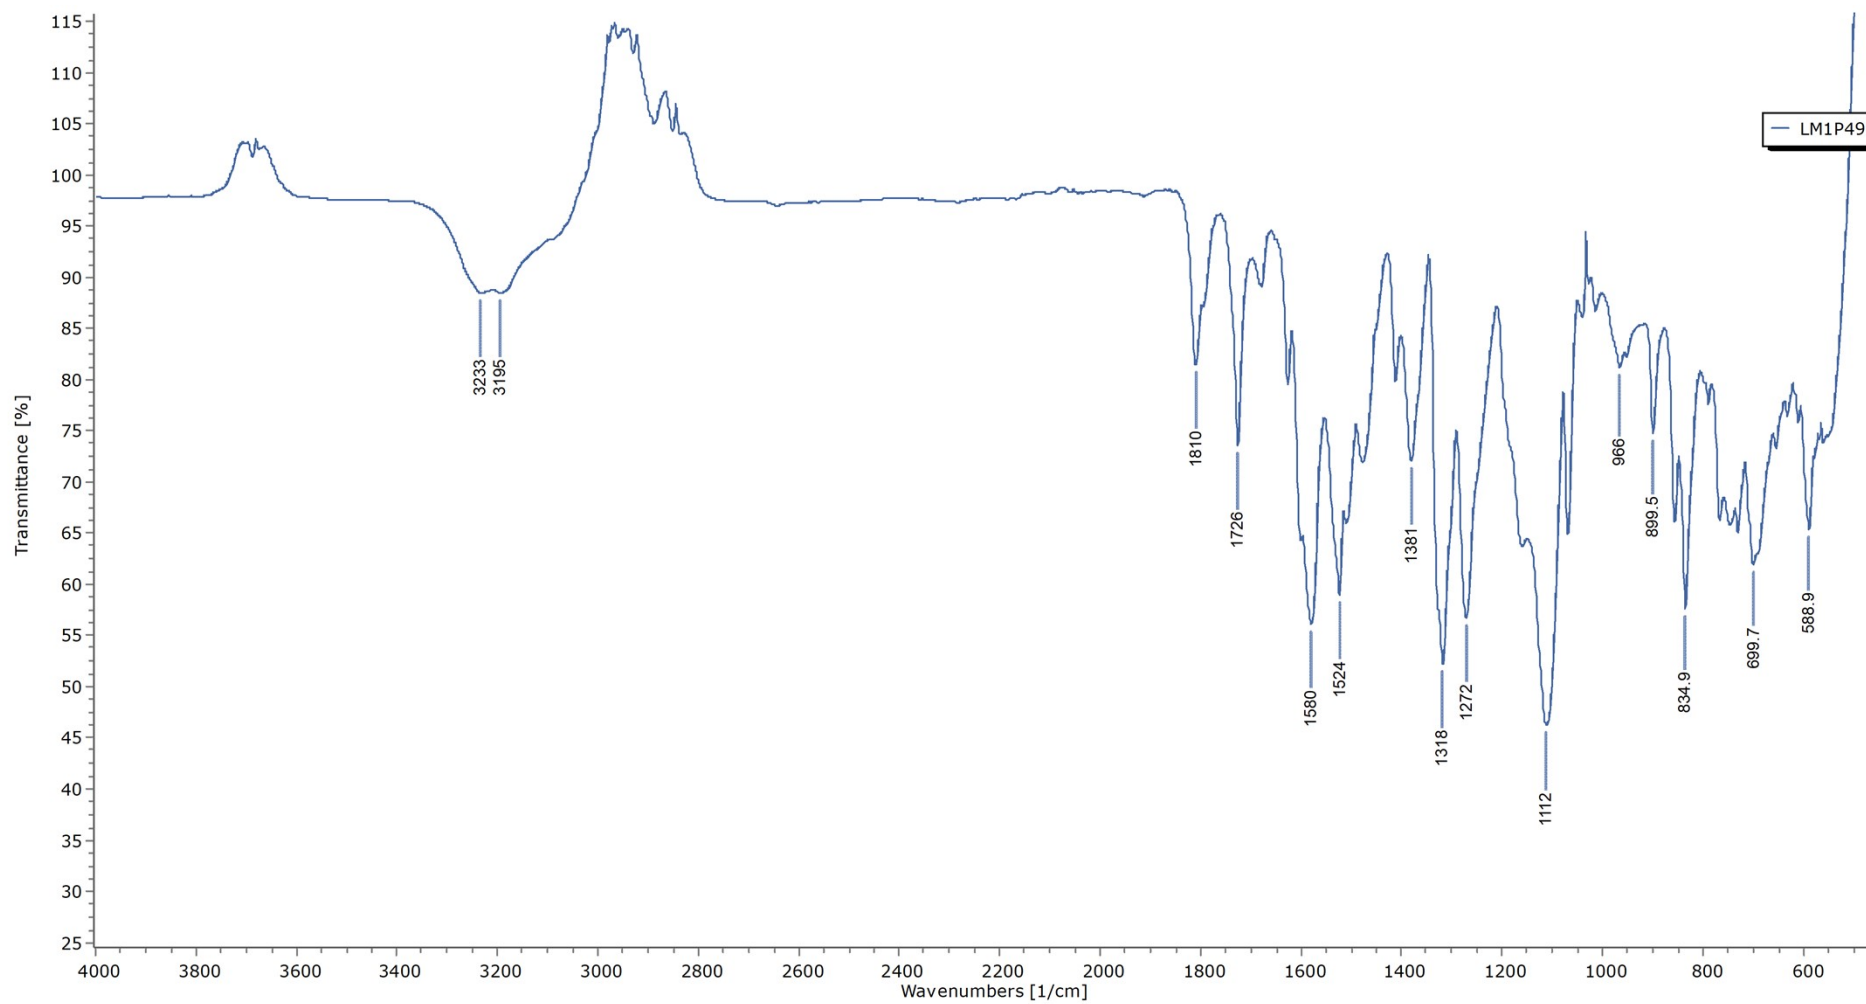

Figure S47. IR spectrum of 2.

### Compounds

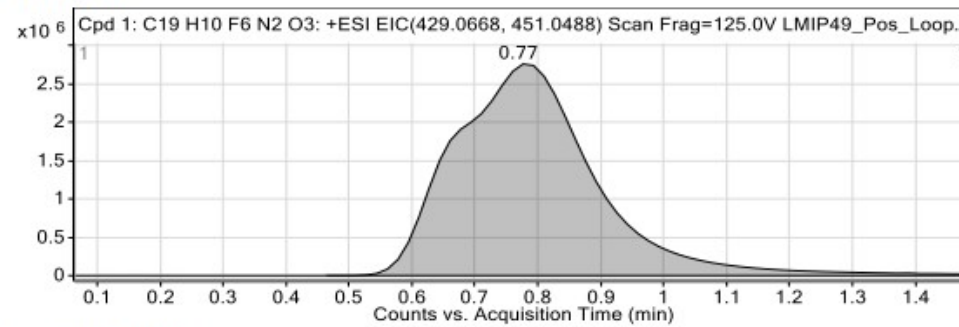

### Integration Peak List

| Start | RT   | End  | Height  | Area     |
|-------|------|------|---------|----------|
| 0.46  | 0.77 | 1.47 | 2565745 | 42556804 |

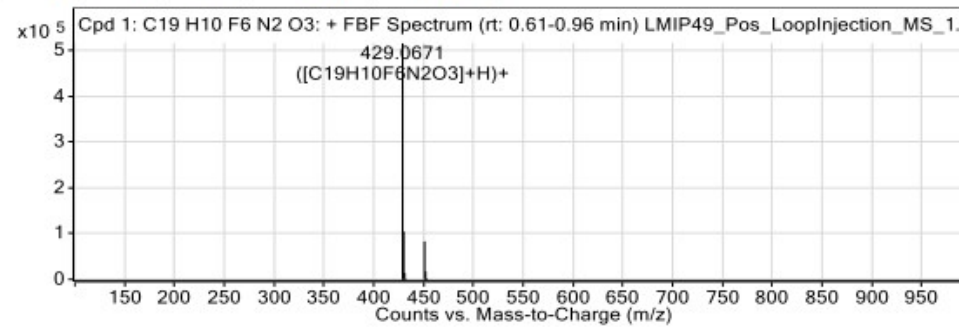

### Peak List

| m/z      | z | Abund     | Formula                                                                      | Ion                 |
|----------|---|-----------|------------------------------------------------------------------------------|---------------------|
| 429.0671 | 1 | 516063.66 | C <sub>19</sub> H <sub>10</sub> F <sub>6</sub> N <sub>2</sub> O <sub>3</sub> | (M+H) <sup>+</sup>  |
| 430.0702 | 1 | 104402.95 | C <sub>19</sub> H <sub>10</sub> F <sub>6</sub> N <sub>2</sub> O <sub>3</sub> | (M+H) <sup>+</sup>  |
| 431.0725 | 1 | 14208.69  | C <sub>19</sub> H <sub>10</sub> F <sub>6</sub> N <sub>2</sub> O <sub>3</sub> | (M+H) <sup>+</sup>  |
| 432.0748 | 1 | 1429.52   | C <sub>19</sub> H <sub>10</sub> F <sub>6</sub> N <sub>2</sub> O <sub>3</sub> | (M+H) <sup>+</sup>  |
| 451.0488 | 1 | 82831.23  | C <sub>19</sub> H <sub>10</sub> F <sub>6</sub> N <sub>2</sub> O <sub>3</sub> | (M+Na) <sup>+</sup> |
| 452.0518 | 1 | 17284.08  | C <sub>19</sub> H <sub>10</sub> F <sub>6</sub> N <sub>2</sub> O <sub>3</sub> | (M+Na) <sup>+</sup> |
| 453.0548 | 1 | 2438.04   | C <sub>19</sub> H <sub>10</sub> F <sub>6</sub> N <sub>2</sub> O <sub>3</sub> | (M+Na) <sup>+</sup> |
| 454.0573 | 1 | 228.05    | C <sub>19</sub> H <sub>10</sub> F <sub>6</sub> N <sub>2</sub> O <sub>3</sub> | (M+Na) <sup>+</sup> |

--- End Of Report ---

Figure S48. HRMS of 2

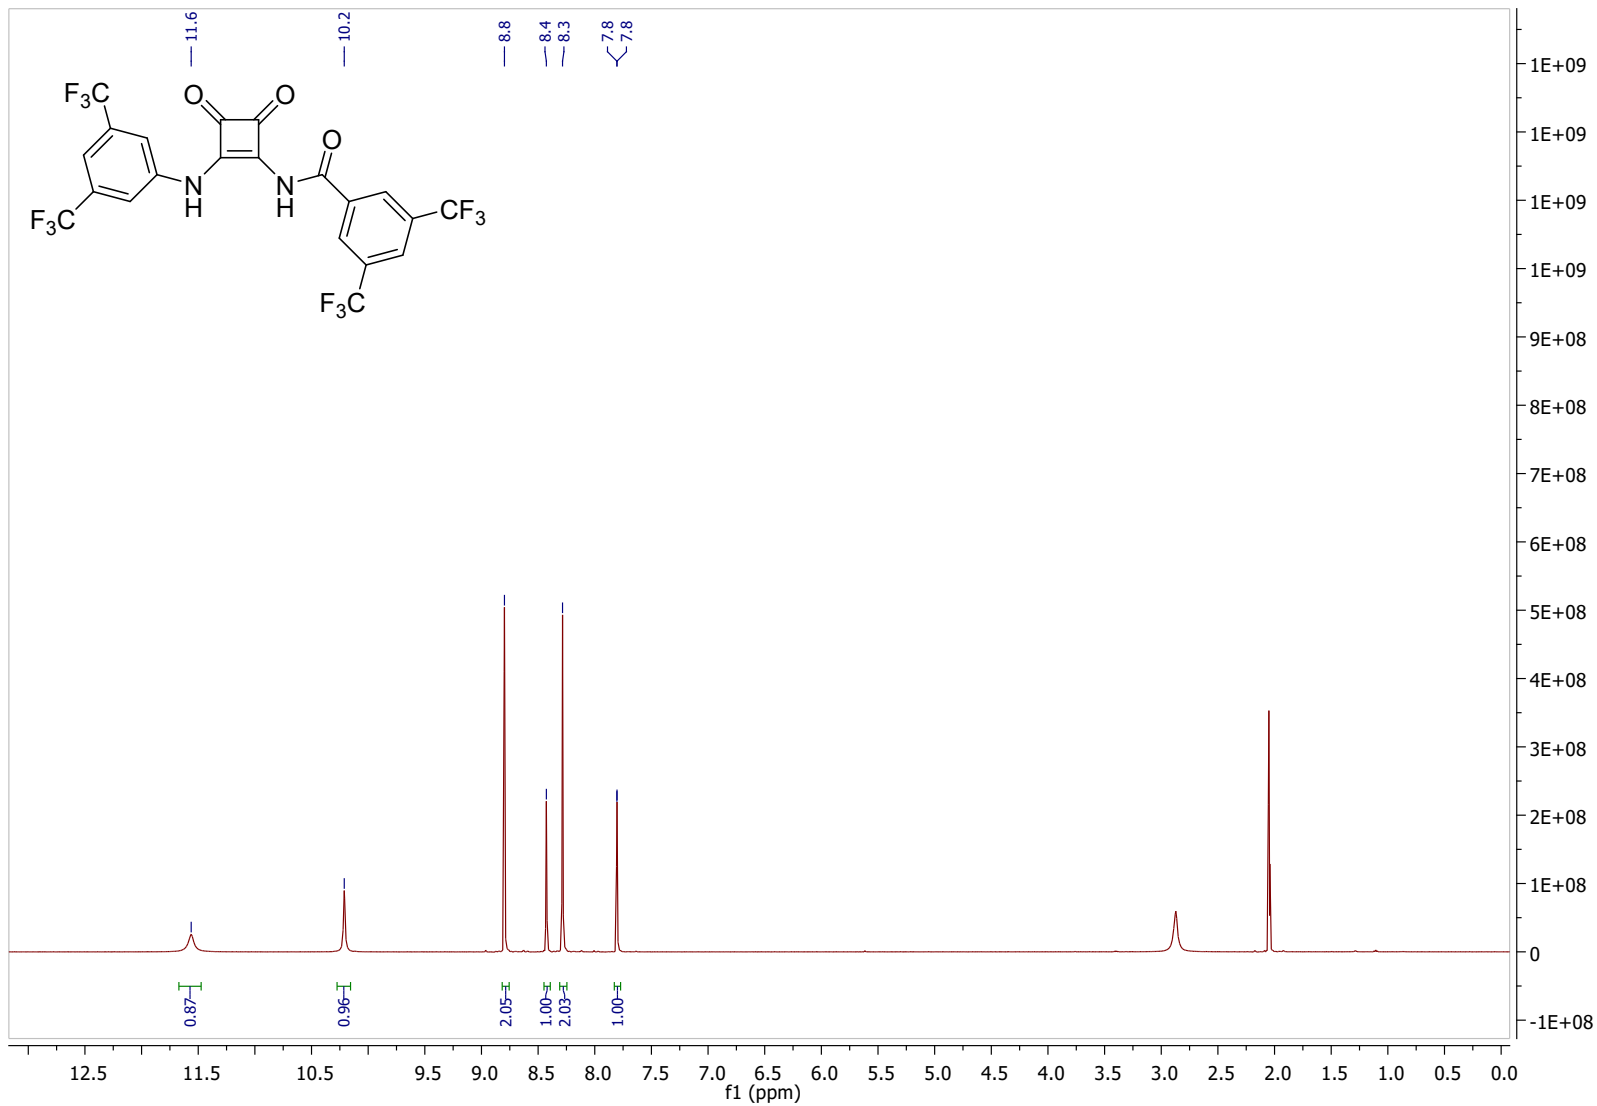

**Figure S49.**  $^1\text{H}$  NMR ( $(\text{CD}_3)_2\text{CO}-d_6$ , 500 MHz) spectrum of **3**.

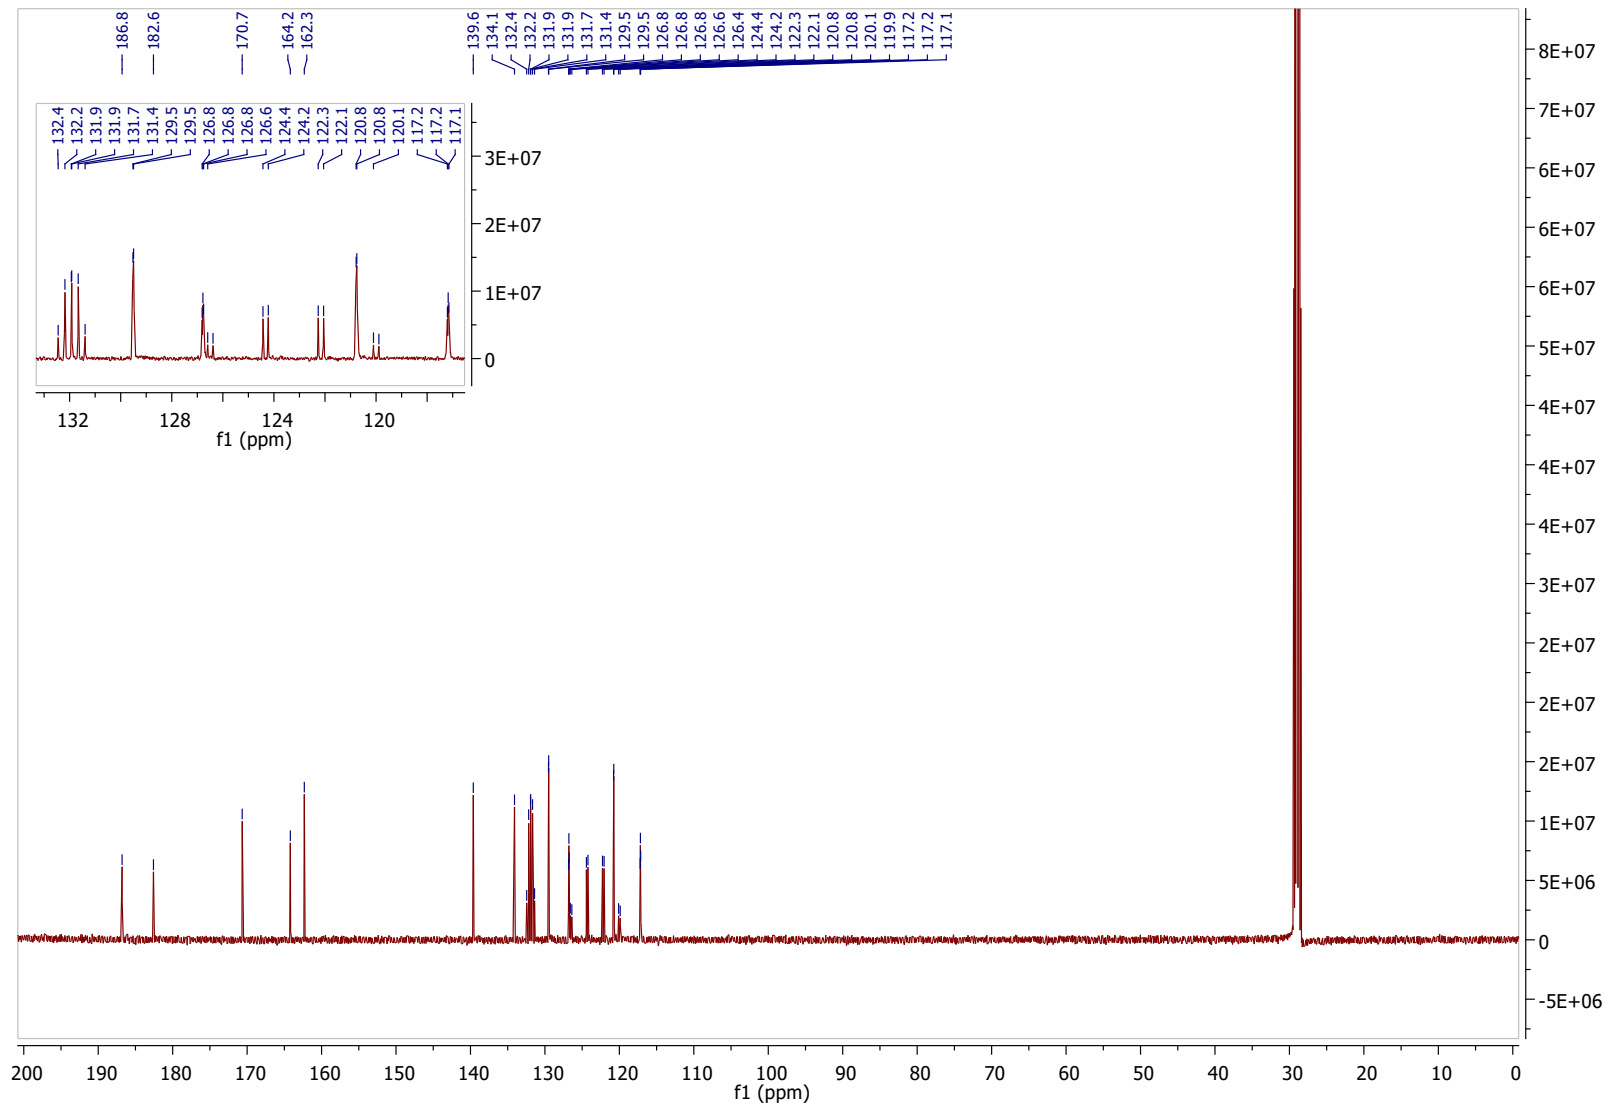

Figure S50.  $^{13}\text{C}$  NMR ( $(\text{CD}_3)_2\text{CO}-d_6$ , 126 MHz) spectrum of **3**.

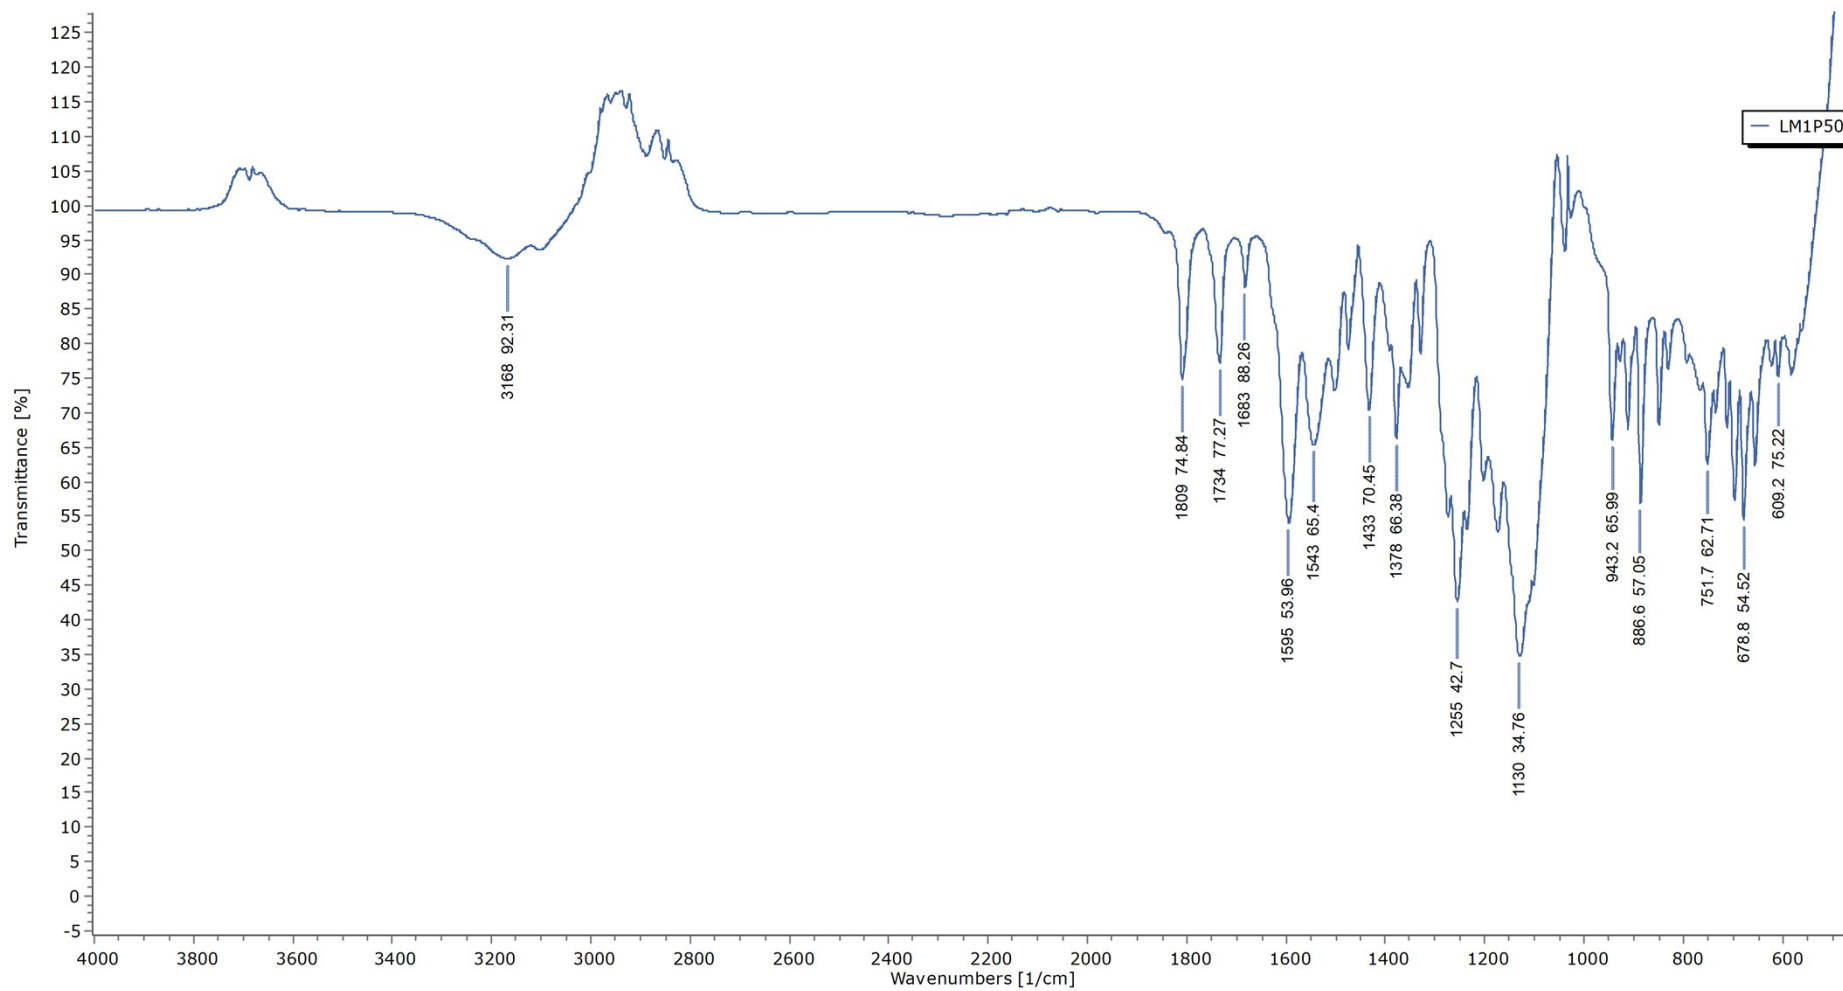

Figure S51. IR spectrum of 3.



### Compounds

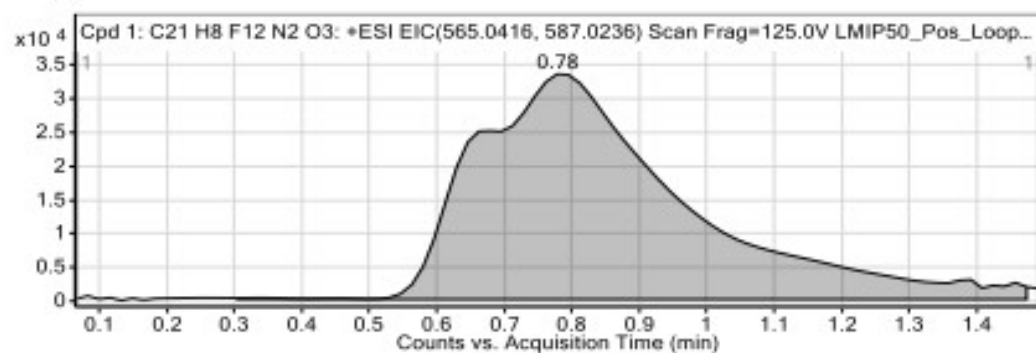

### Integration Peak List

| Start | RT   | End  | Height | Area   |
|-------|------|------|--------|--------|
| 0.3   | 0.78 | 1.47 | 31268  | 718740 |

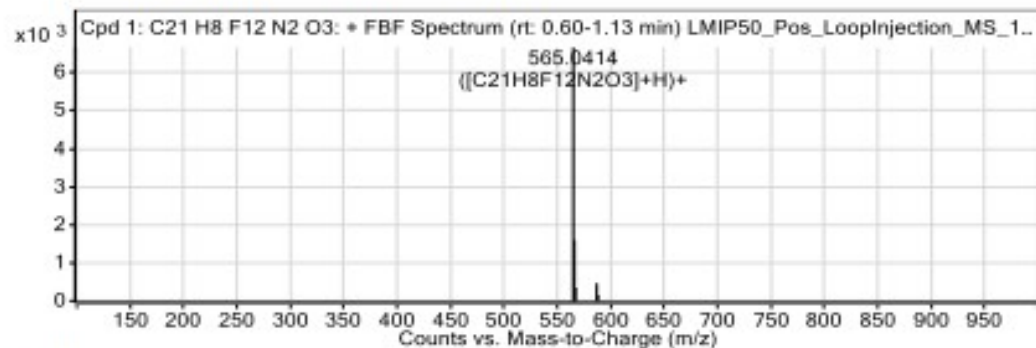

### Peak List

| m/z      | z | Abund   | Formula                                                                      | Ion                 |
|----------|---|---------|------------------------------------------------------------------------------|---------------------|
| 565.0414 | 1 | 6662.23 | C <sub>21</sub> H <sub>8</sub> F <sub>12</sub> N <sub>2</sub> O <sub>3</sub> | (M+H) <sup>+</sup>  |
| 566.0449 | 1 | 1596.42 | C <sub>21</sub> H <sub>8</sub> F <sub>12</sub> N <sub>2</sub> O <sub>3</sub> | (M+H) <sup>+</sup>  |
| 567.0472 | 1 | 348.42  | C <sub>21</sub> H <sub>8</sub> F <sub>12</sub> N <sub>2</sub> O <sub>3</sub> | (M+H) <sup>+</sup>  |
| 587.023  | 1 | 464.75  | C <sub>21</sub> H <sub>8</sub> F <sub>12</sub> N <sub>2</sub> O <sub>3</sub> | (M+Na) <sup>+</sup> |
| 588.0256 | 1 | 152.73  | C <sub>21</sub> H <sub>8</sub> F <sub>12</sub> N <sub>2</sub> O <sub>3</sub> | (M+Na) <sup>+</sup> |

--- End Of Report ---

Figure S52. HRMS of 3.

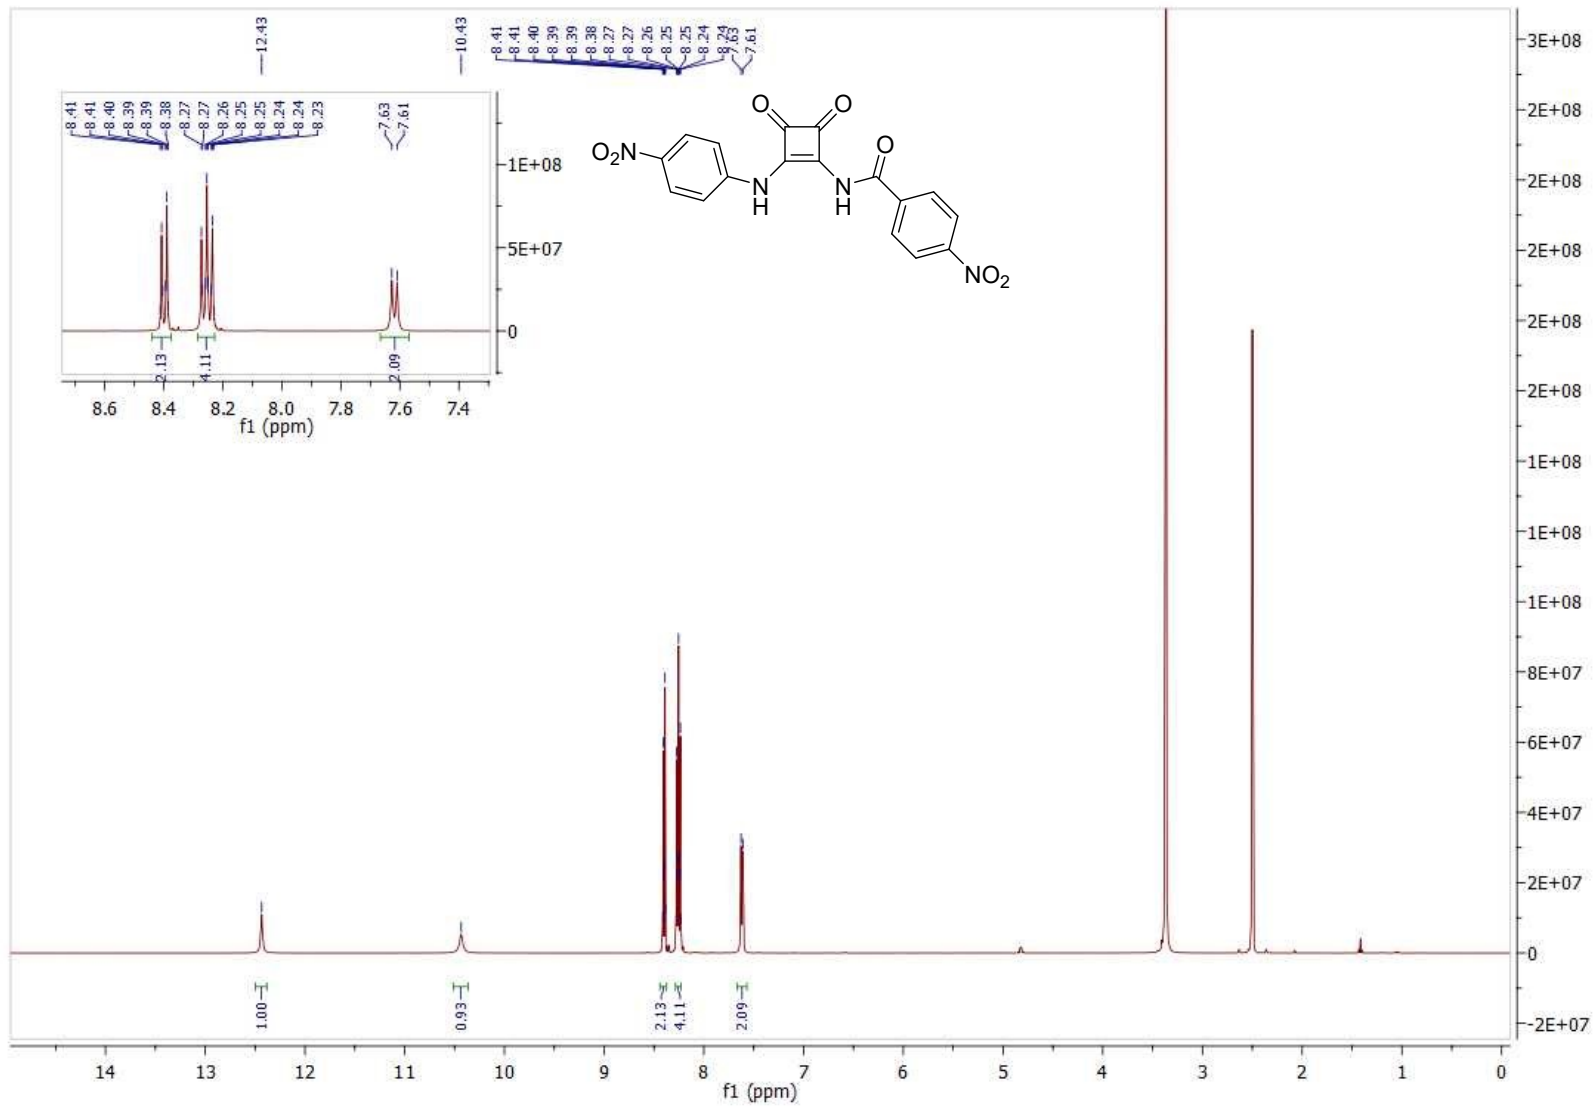

**Figure S53.** <sup>1</sup>H NMR (DMSO-d<sub>6</sub>, 500 MHz) spectrum of **4**.

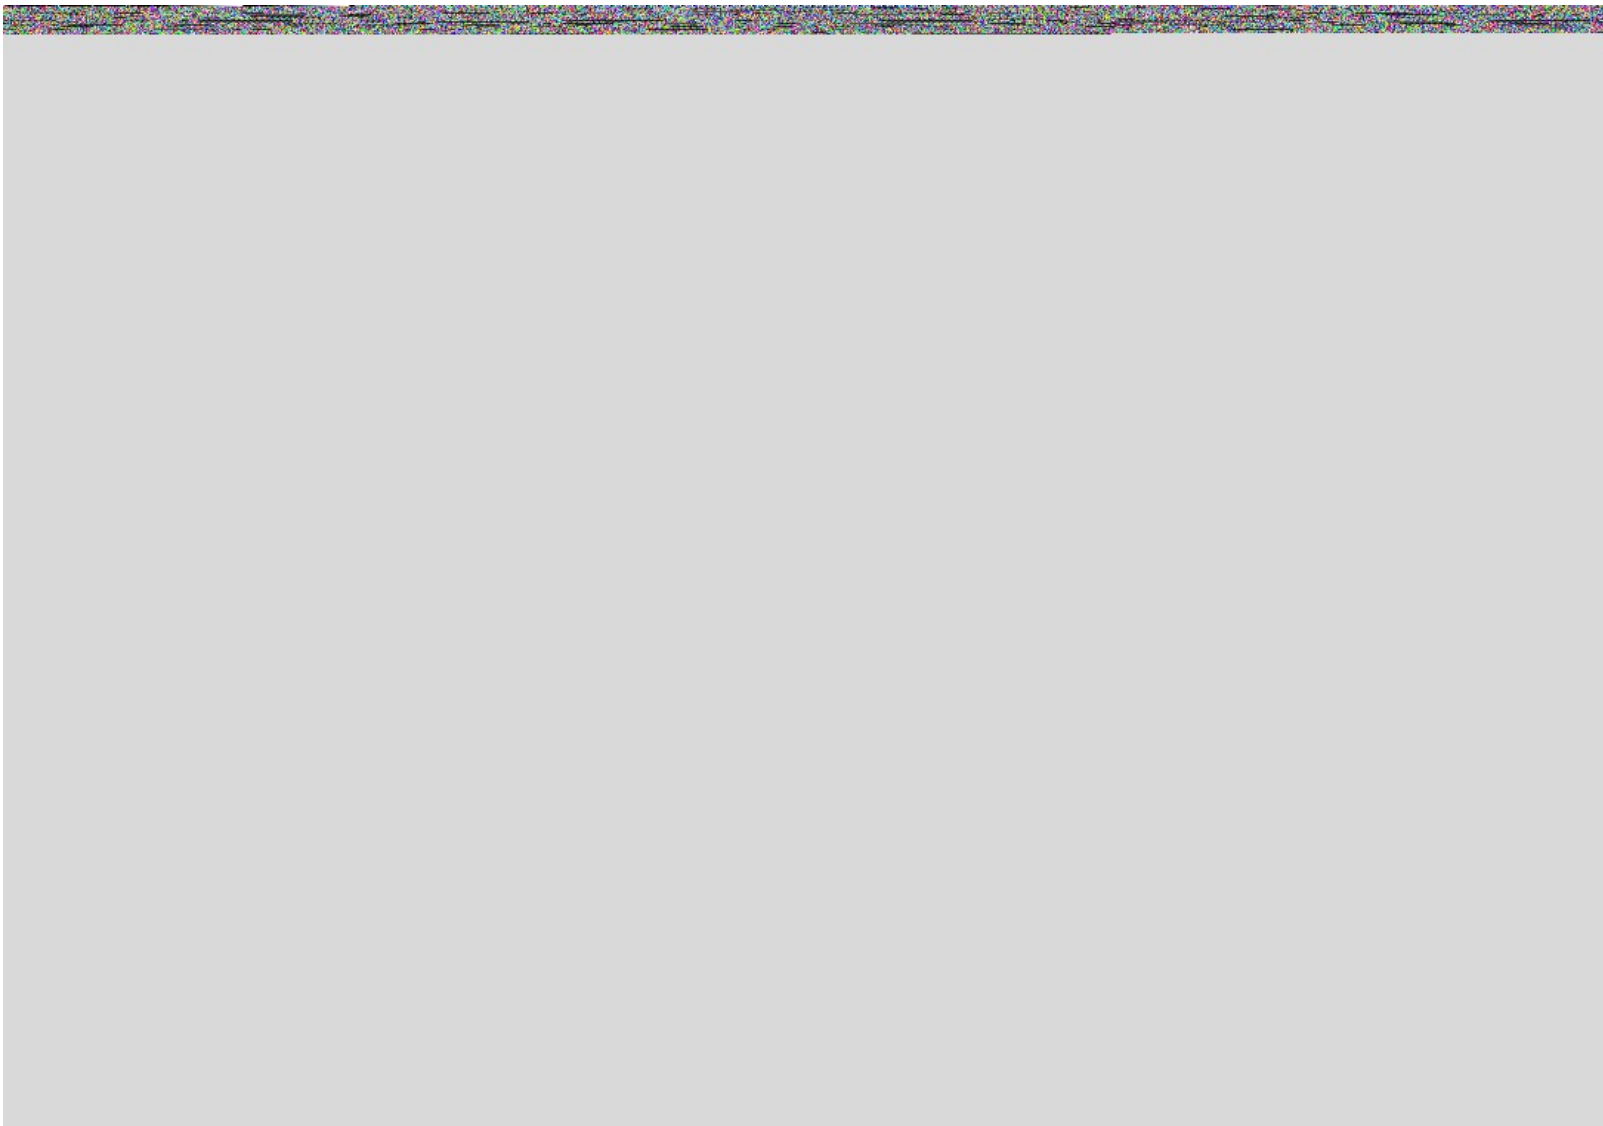

**Figure S54.**  $^{13}\text{C}$  NMR (DMSO- $d_6$ , 126 MHz) spectrum of **4**.

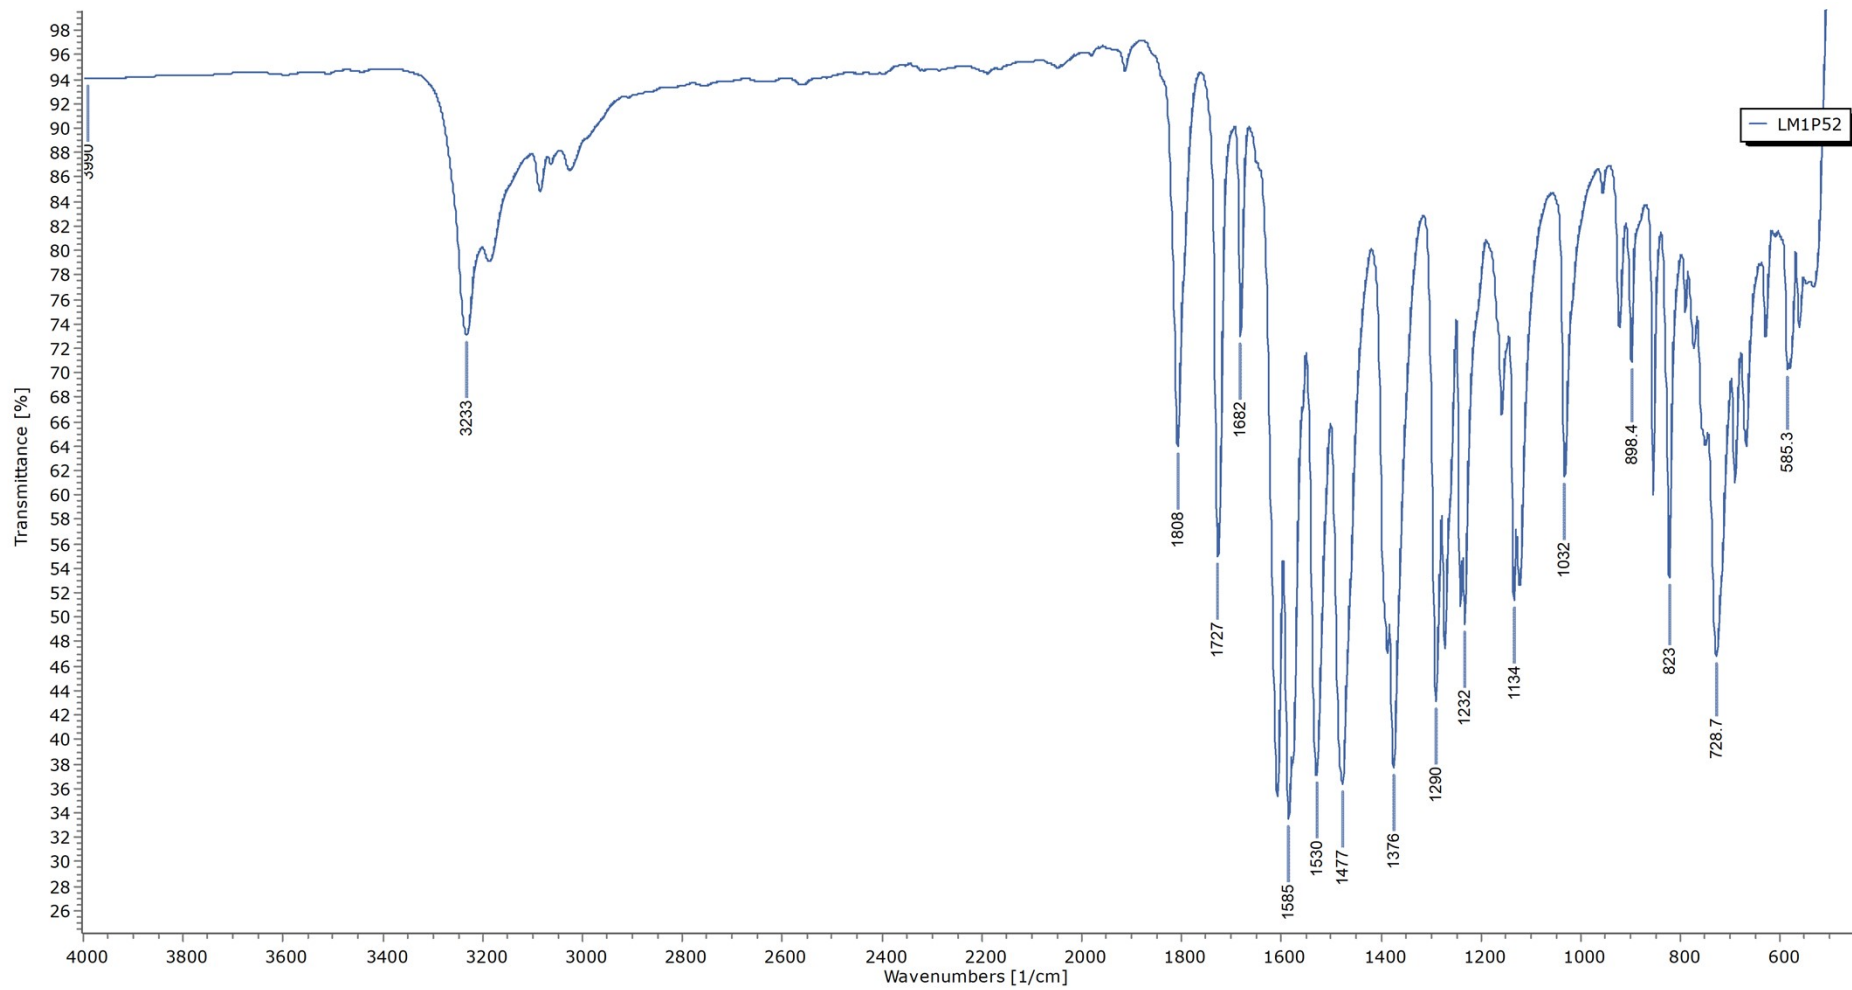

Figure S55. IR spectrum of 4.

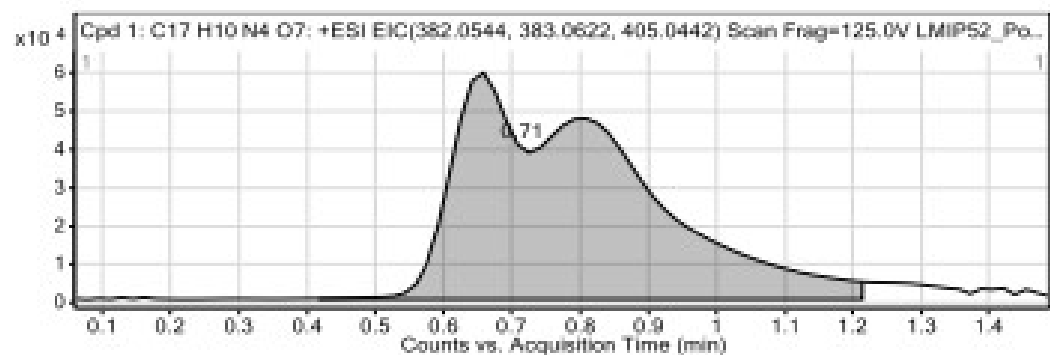

**Integration Peak List**

| Start | RT   | End  | Height | Area    |
|-------|------|------|--------|---------|
| 0.42  | 0.71 | 1.21 | 51518  | 1056805 |

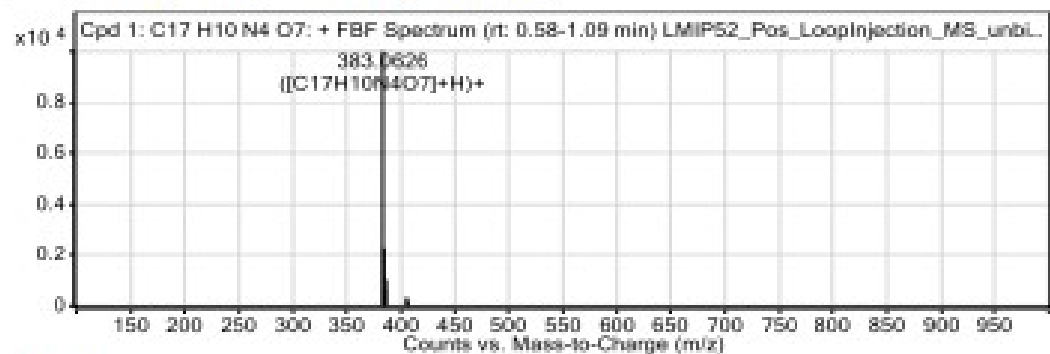

**Peak List**

| m/z      | z | Abund    | Formula    | Ion     |
|----------|---|----------|------------|---------|
| 383.0626 | 1 | 10051.52 | C17H10N4O7 | (M+H)+  |
| 384.0661 | 1 | 2283.79  | C17H10N4O7 | (M+H)+  |
| 385.0708 | 1 | 617.55   | C17H10N4O7 | (M+H)+  |
| 386.0813 | 1 | 1026.47  | C17H10N4O7 | (M+H)+  |
| 405.0449 | 1 | 334.57   | C17H10N4O7 | (M+Na)+ |
| 406.0365 | 1 | 213.53   | C17H10N4O7 | (M+Na)+ |

--- End Of Report ---

Figure S56. HRMS of 4.

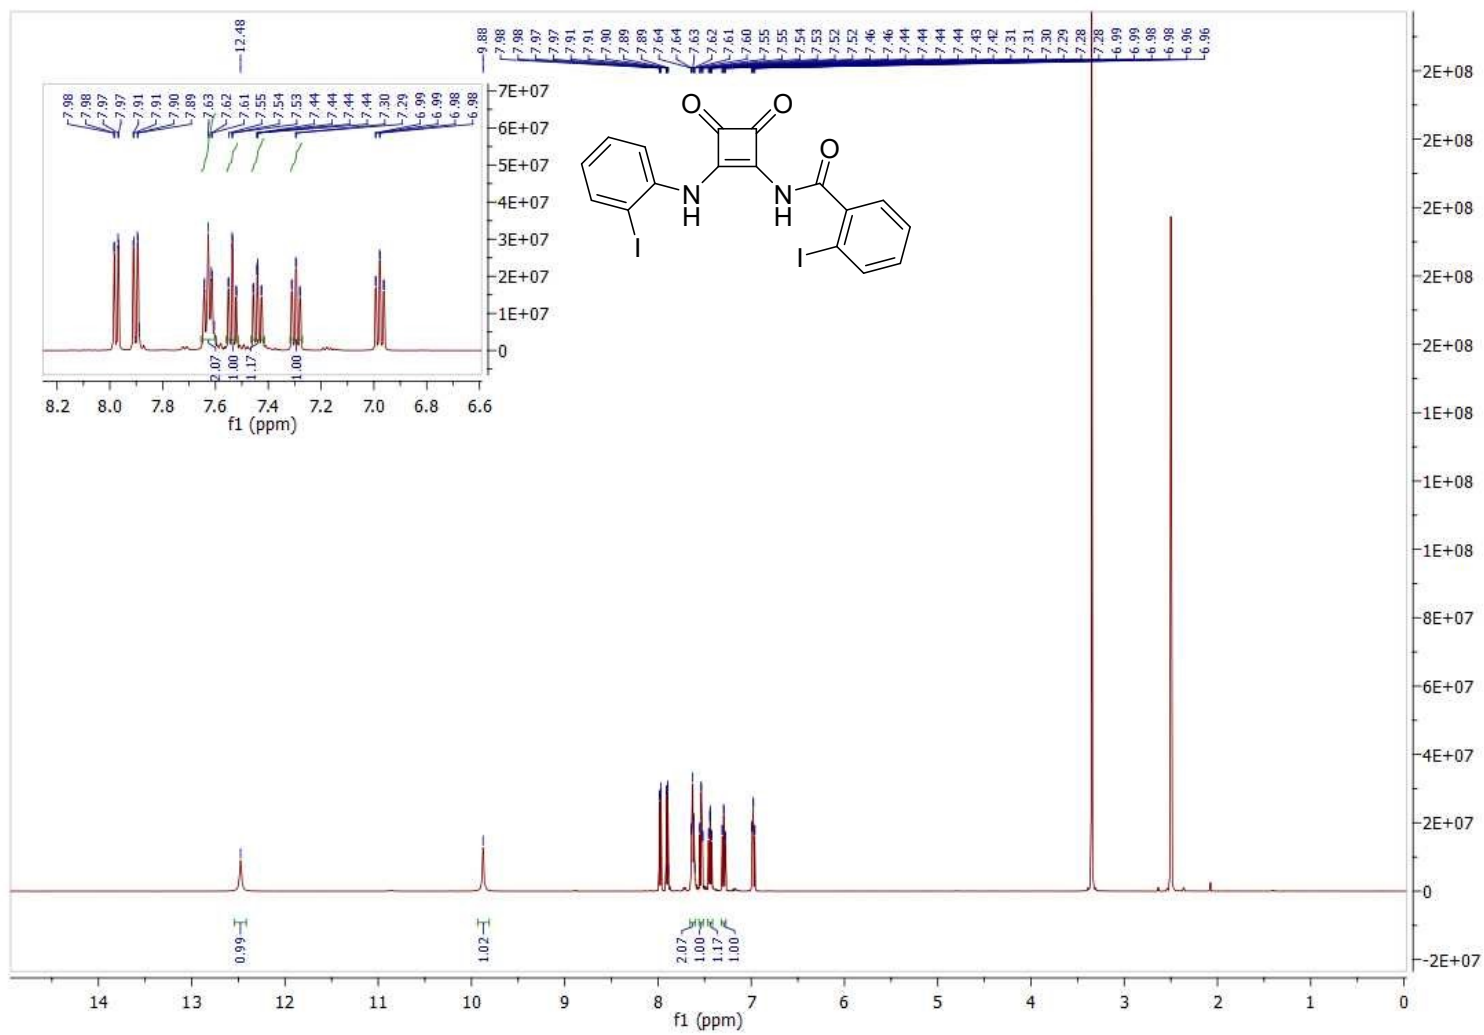

Figure S57.  $^1\text{H}$  NMR ( $\text{DMSO-}d_6$ , 500 MHz) spectrum of **5**.

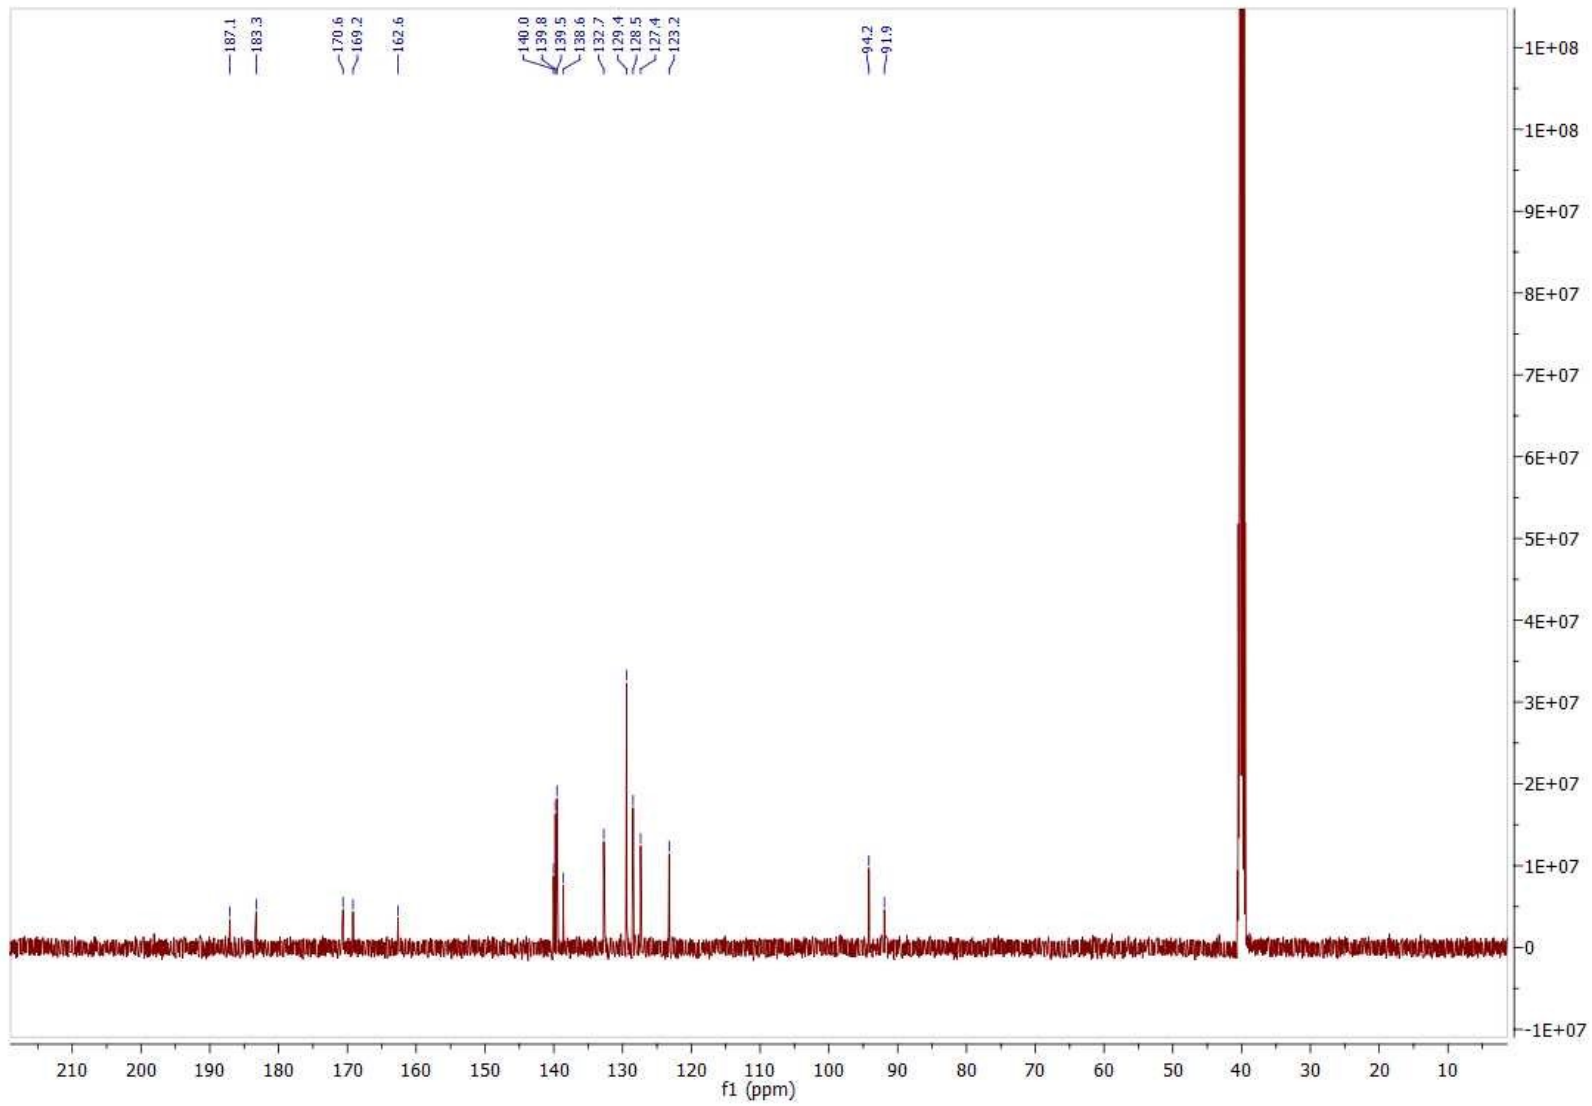

**Figure 58.**  $^{13}\text{C}$  NMR ( $\text{DMSO-d}_6$ , 126 MHz) spectrum of 5.

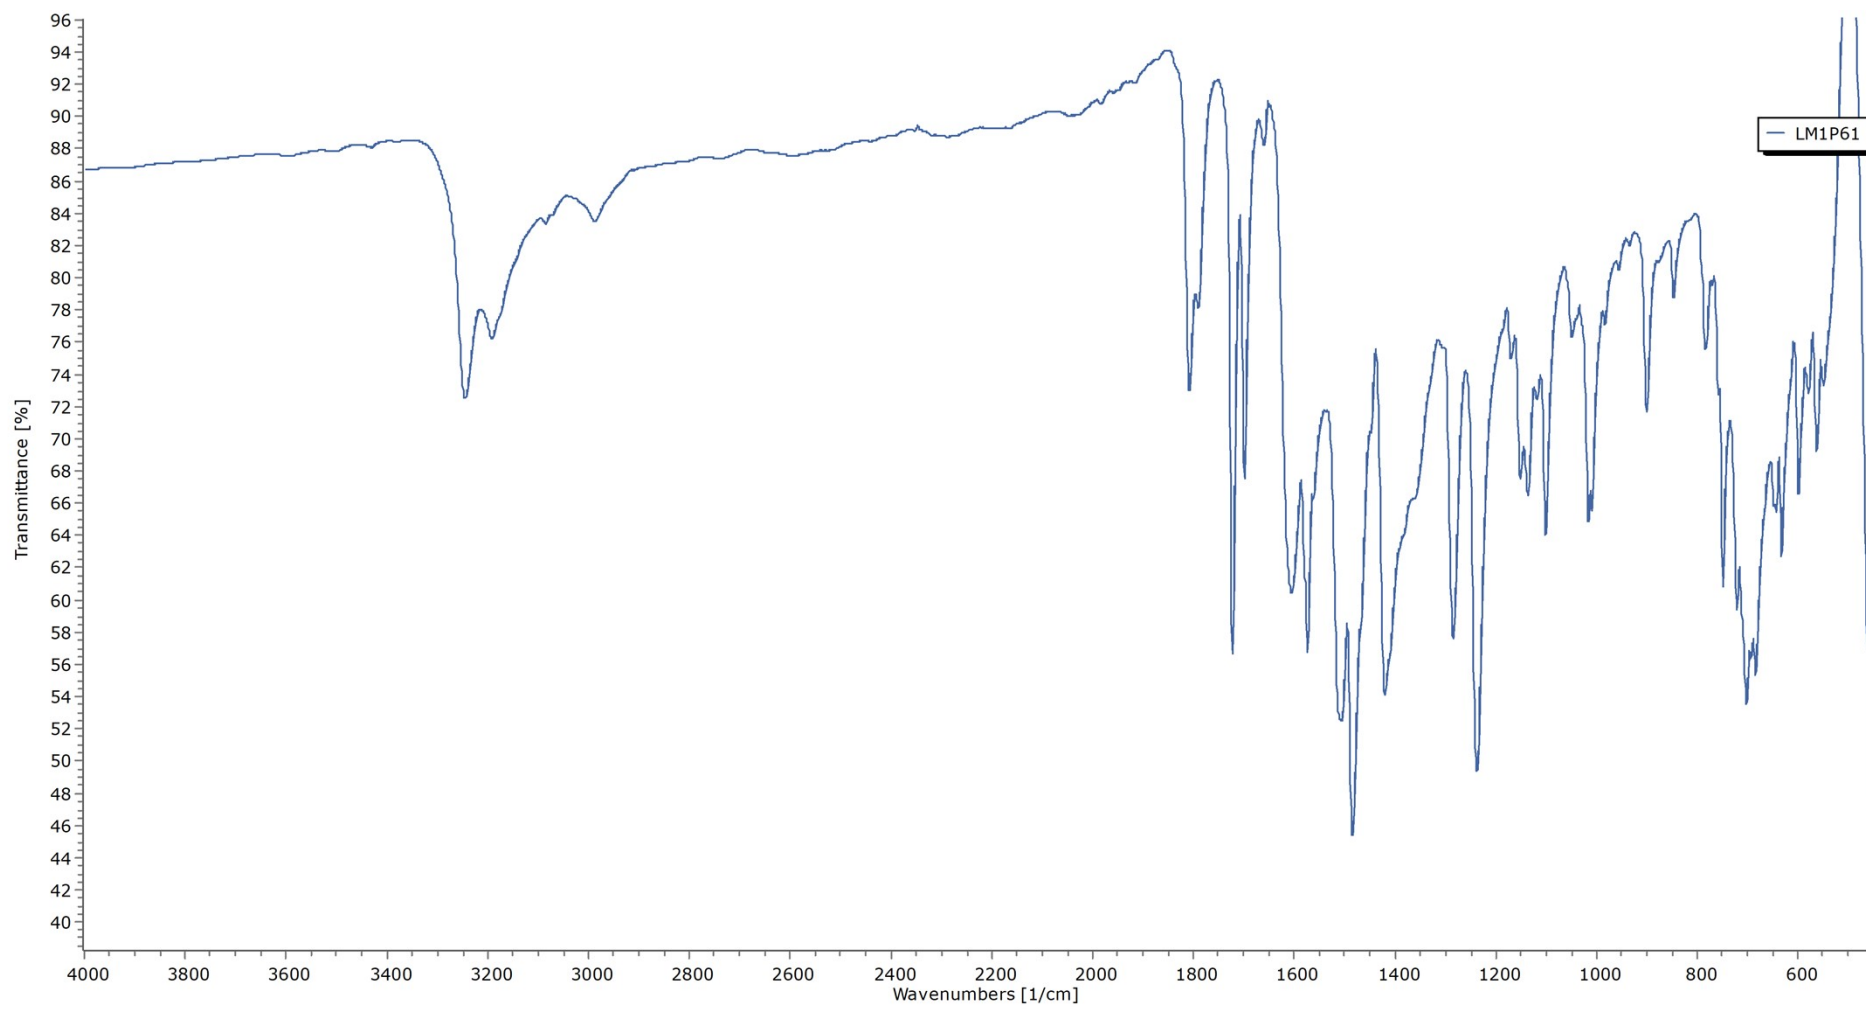

**Figure S59.** IR spectrum of 5.



### Compounds

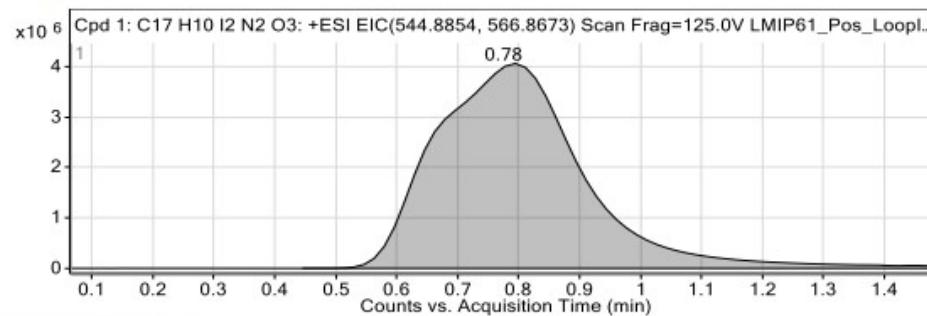

### Integration Peak List

| Start | RT   | End  | Height  | Area     |
|-------|------|------|---------|----------|
| 0.45  | 0.78 | 1.47 | 3793140 | 68013276 |

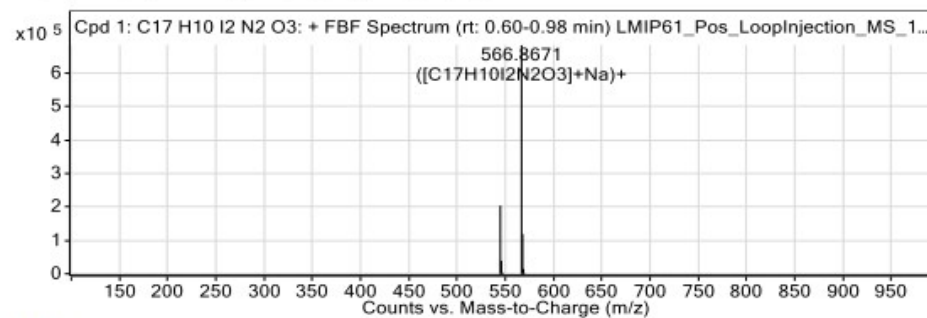

### Peak List

| m/z      | z | Abund     | Formula                                                                      | Ion                 |
|----------|---|-----------|------------------------------------------------------------------------------|---------------------|
| 544.8851 | 1 | 204029.7  | C <sub>17</sub> H <sub>10</sub> I <sub>2</sub> N <sub>2</sub> O <sub>3</sub> | (M+H) <sup>+</sup>  |
| 545.888  | 1 | 39219.65  | C <sub>17</sub> H <sub>10</sub> I <sub>2</sub> N <sub>2</sub> O <sub>3</sub> | (M+H) <sup>+</sup>  |
| 546.8907 | 1 | 4593.09   | C <sub>17</sub> H <sub>10</sub> I <sub>2</sub> N <sub>2</sub> O <sub>3</sub> | (M+H) <sup>+</sup>  |
| 547.8918 | 1 | 444.34    | C <sub>17</sub> H <sub>10</sub> I <sub>2</sub> N <sub>2</sub> O <sub>3</sub> | (M+H) <sup>+</sup>  |
| 566.8671 | 1 | 684266.06 | C <sub>17</sub> H <sub>10</sub> I <sub>2</sub> N <sub>2</sub> O <sub>3</sub> | (M+Na) <sup>+</sup> |
| 567.8701 | 1 | 118774.71 | C <sub>17</sub> H <sub>10</sub> I <sub>2</sub> N <sub>2</sub> O <sub>3</sub> | (M+Na) <sup>+</sup> |
| 568.8724 | 1 | 14634.17  | C <sub>17</sub> H <sub>10</sub> I <sub>2</sub> N <sub>2</sub> O <sub>3</sub> | (M+Na) <sup>+</sup> |
| 569.8749 | 1 | 1514.81   | C <sub>17</sub> H <sub>10</sub> I <sub>2</sub> N <sub>2</sub> O <sub>3</sub> | (M+Na) <sup>+</sup> |

--- End Of Report ---

Figure S60. HRMS of 5.

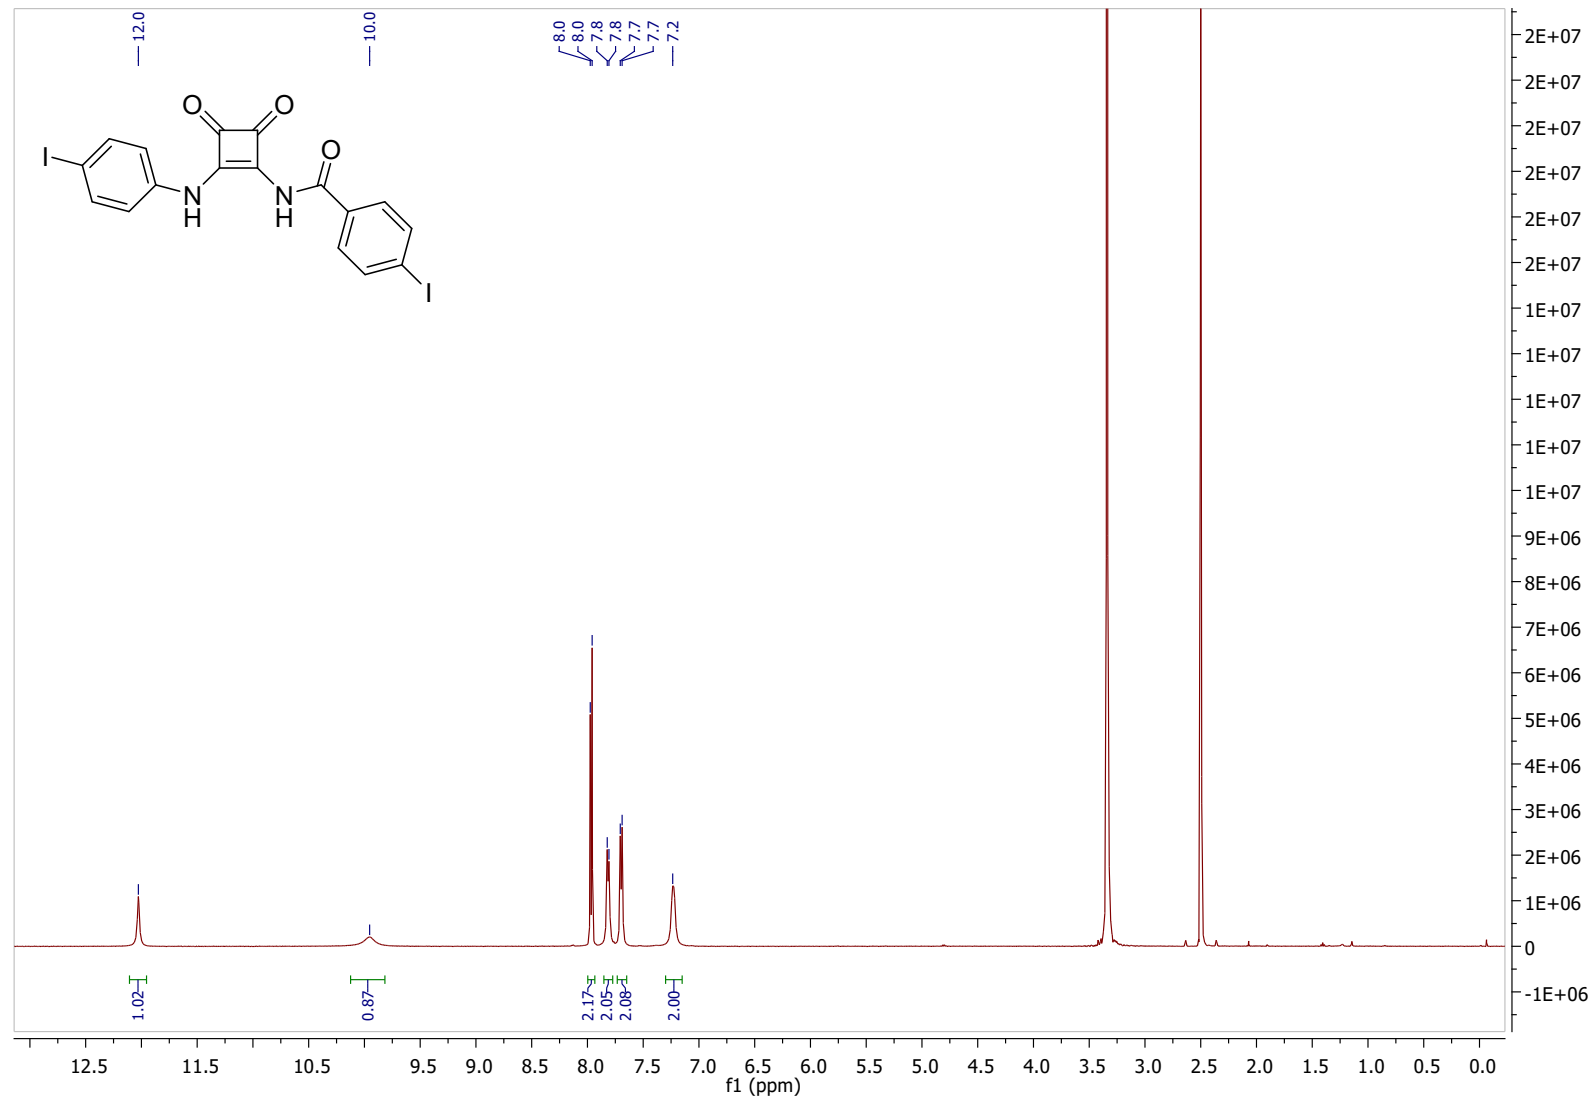

Figure S61. <sup>1</sup>H NMR (DMSO-d<sub>6</sub>, 500 MHz) spectrum of 6.

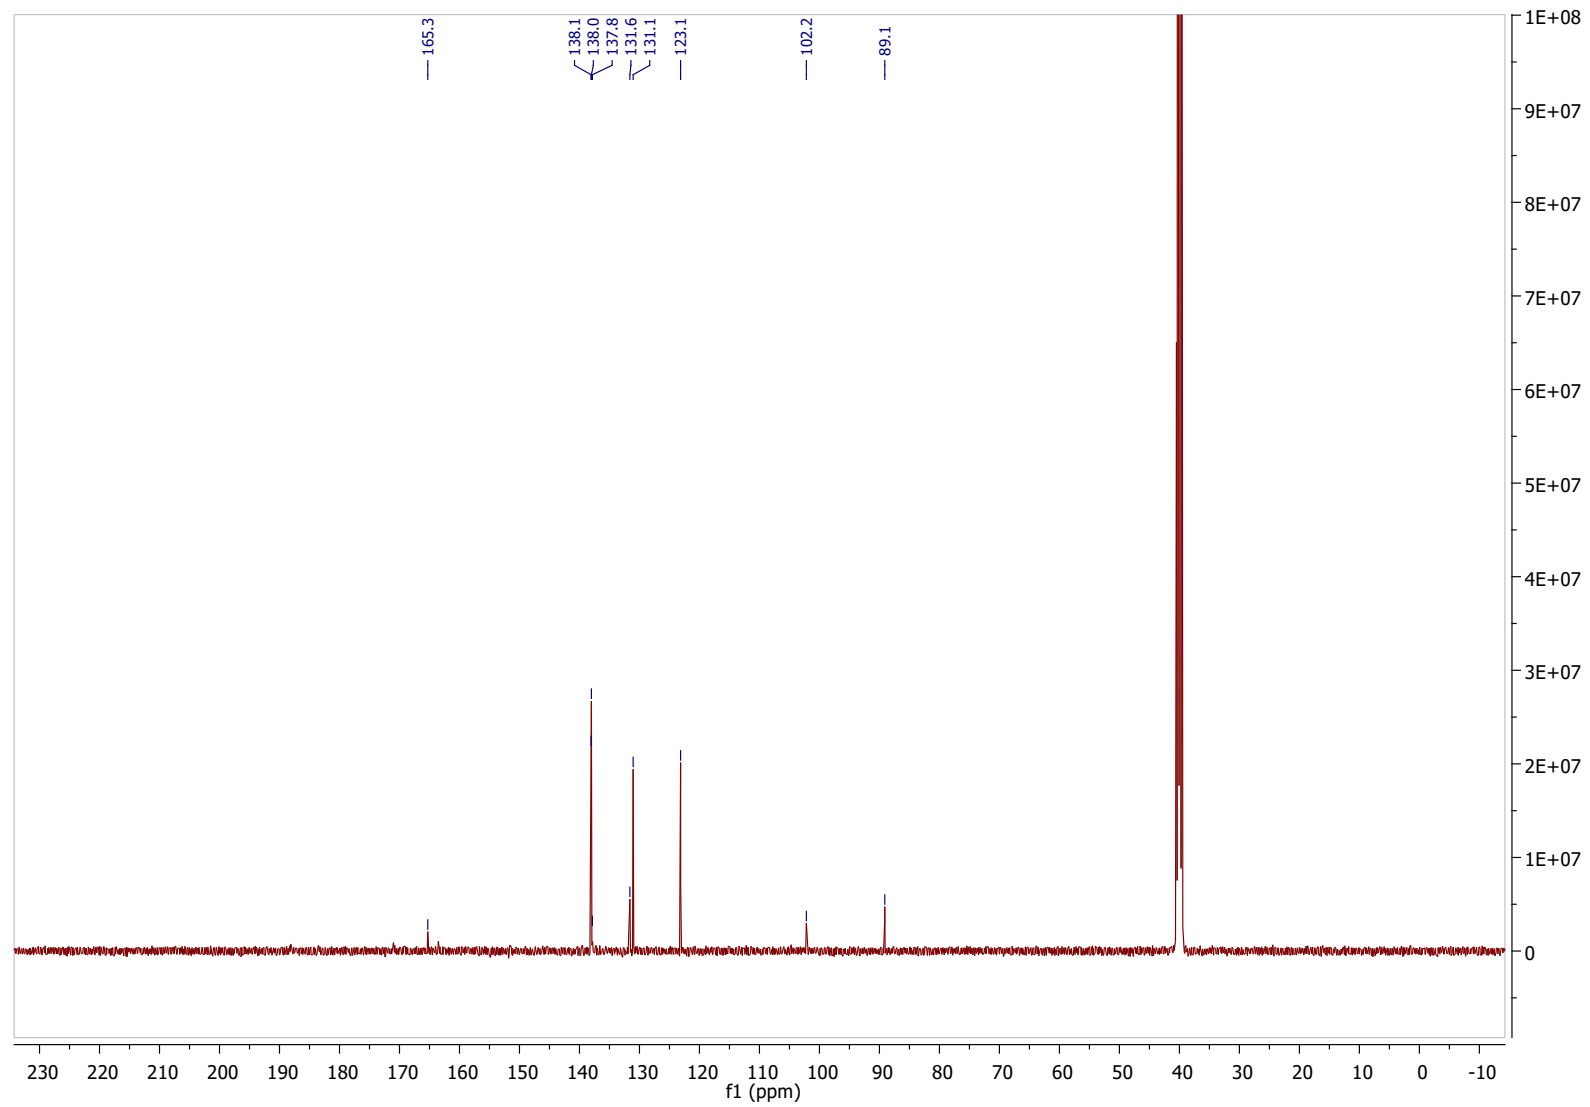

Figure S63.  $^{13}\text{C}$  NMR ( $\text{DMSO}-d_6$ , 126 MHz) spectrum of **6**.

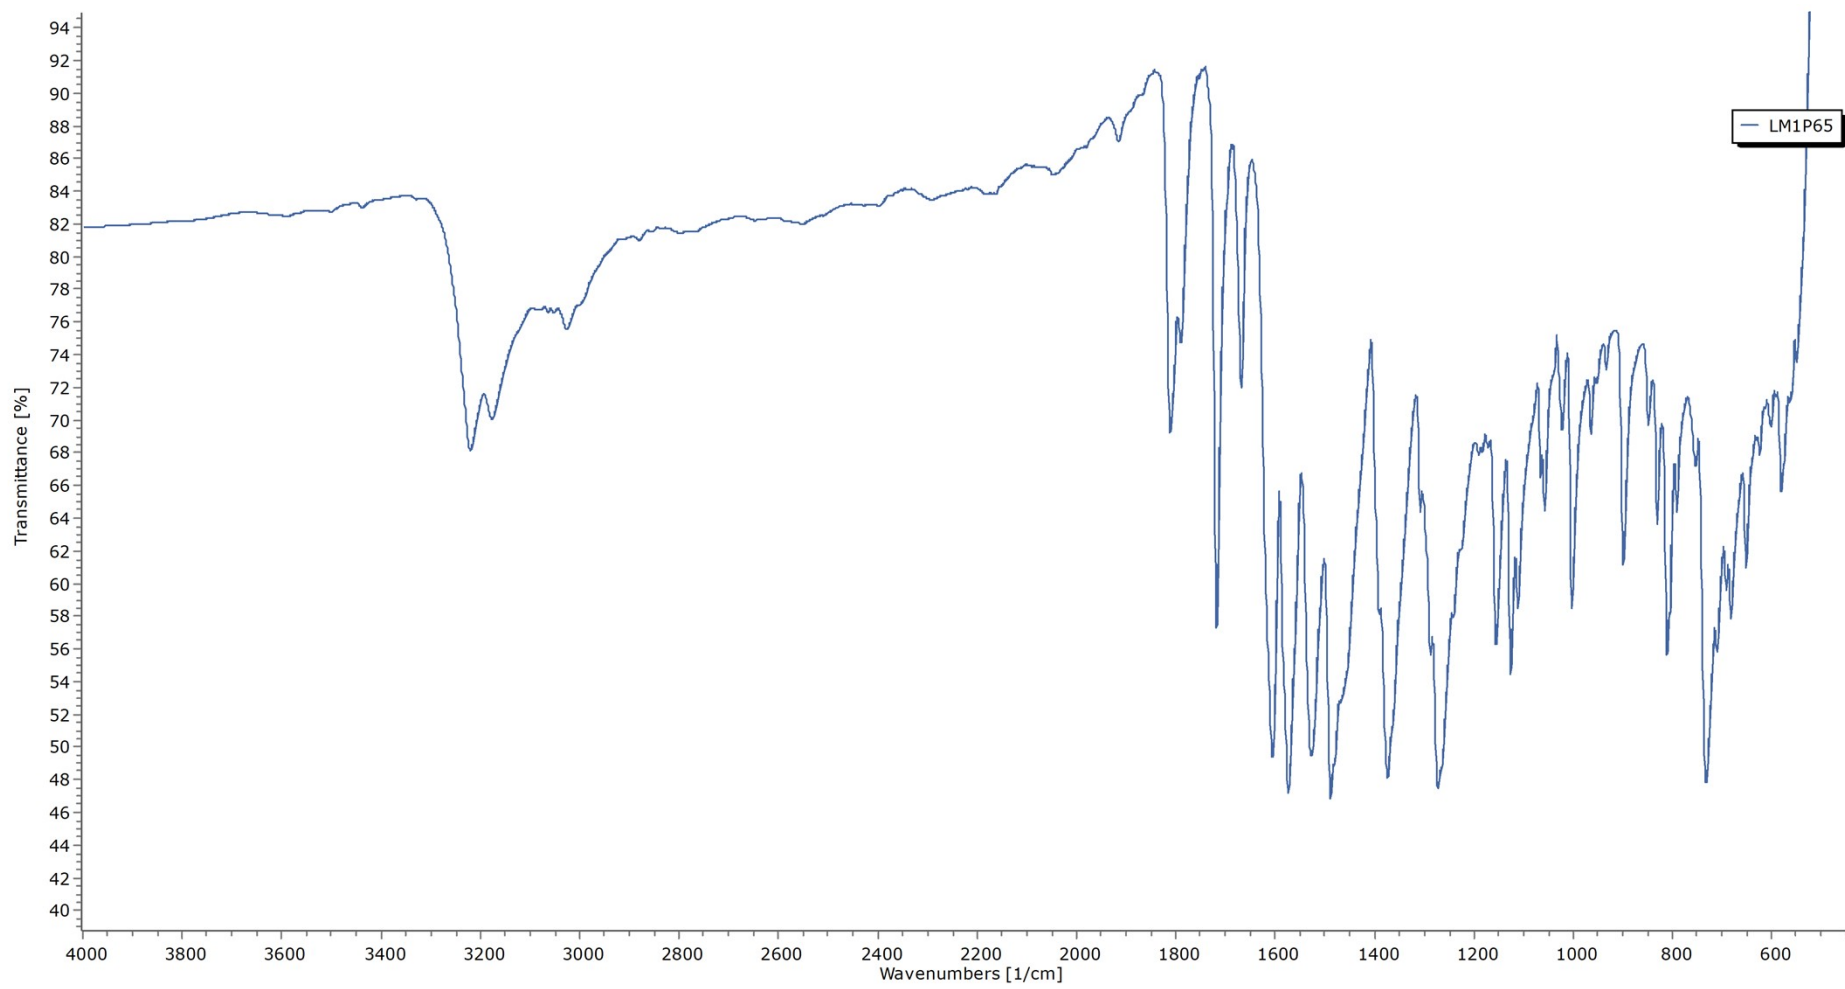

**Figure S64.** IR spectrum of **6**.

### Compounds

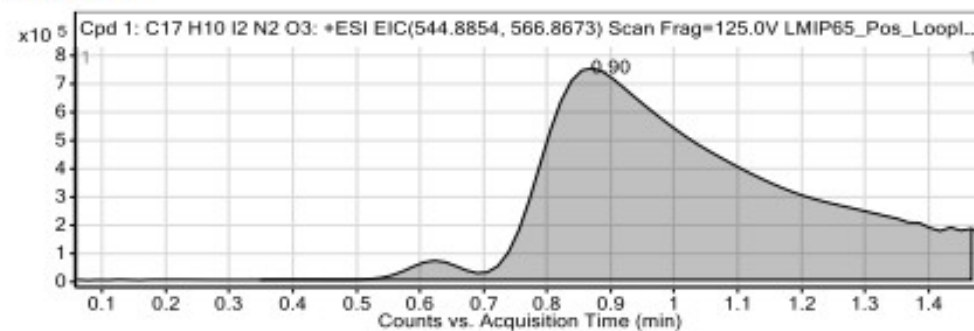

### Integration Peak List

| Start | RT  | End  | Height | Area     |
|-------|-----|------|--------|----------|
| 0.35  | 0.9 | 1.47 | 742996 | 17890863 |

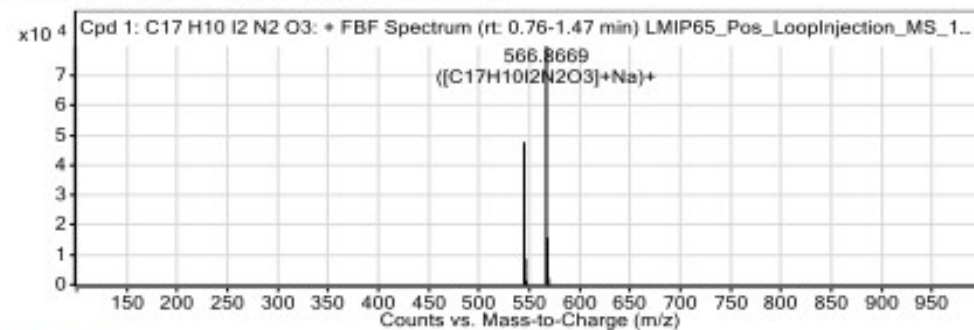

### Peak List

| m/z      | z | Abund    | Formula      | Ion     |
|----------|---|----------|--------------|---------|
| 544.8846 | 1 | 47712.78 | C17H10I2N2O3 | (M+H)+  |
| 545.8878 | 1 | 8701.18  | C17H10I2N2O3 | (M+H)+  |
| 546.8899 | 1 | 1333.92  | C17H10I2N2O3 | (M+H)+  |
| 547.8885 | 1 | 163.43   | C17H10I2N2O3 | (M+H)+  |
| 566.8669 | 1 | 79898.44 | C17H10I2N2O3 | (M+Na)+ |
| 567.8698 | 1 | 15761.88 | C17H10I2N2O3 | (M+Na)+ |
| 568.8725 | 1 | 2281.32  | C17H10I2N2O3 | (M+Na)+ |
| 569.8507 | 1 | 322.66   | C17H10I2N2O3 | (M+Na)+ |

--- End Of Report ---

Figure S65. HRMS of 6.

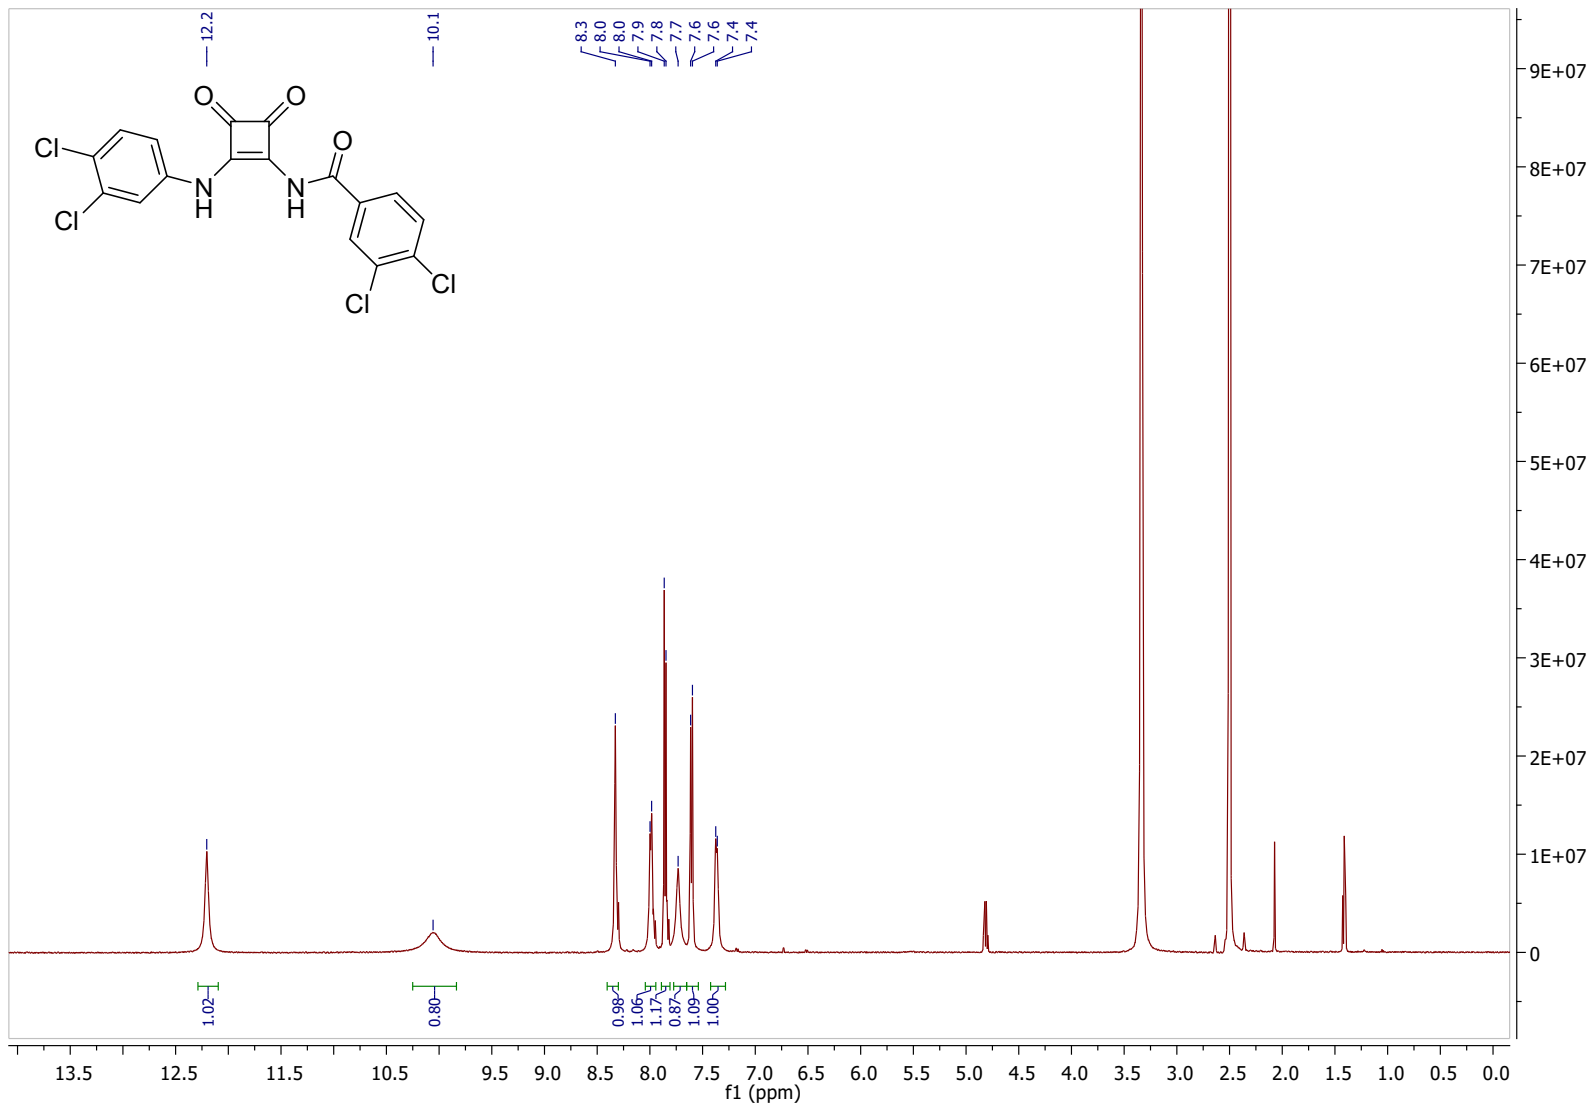

**Figure S66.** <sup>1</sup>H NMR (DMSO-d<sub>6</sub>, 500 MHz) spectrum of 7.

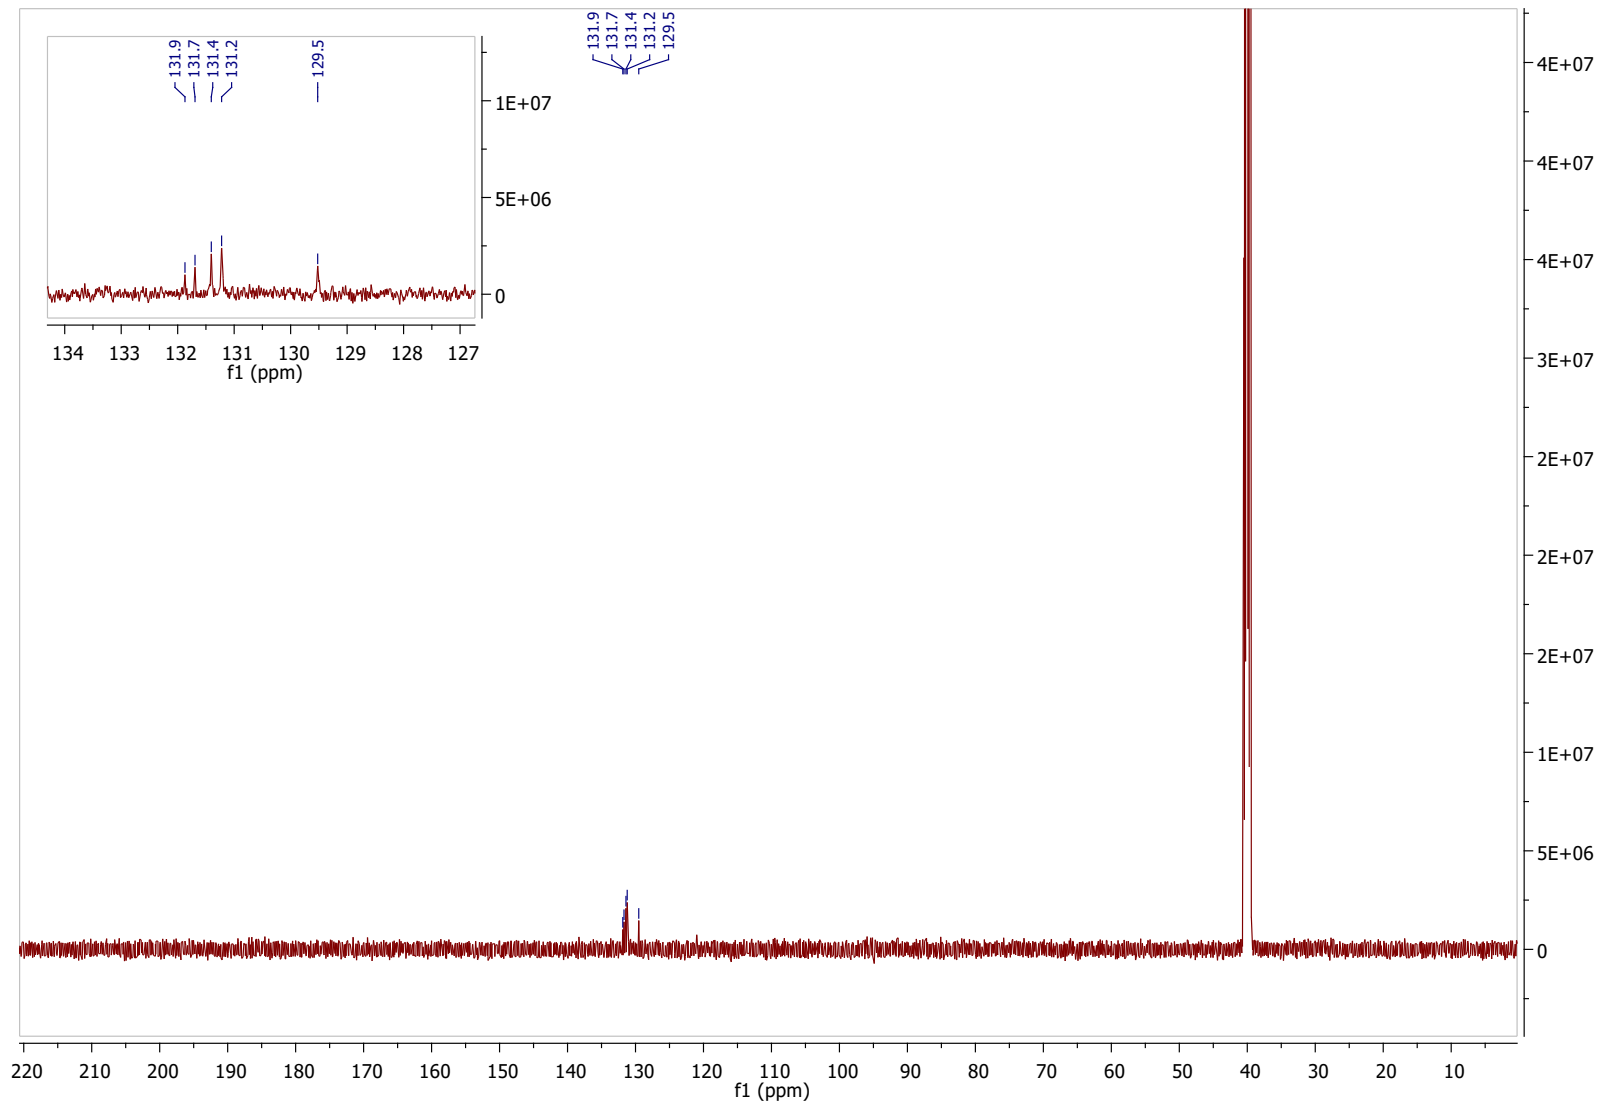

Figure S67.  $^{13}\text{C}$  NMR ( $\text{DMSO}-d_6$ , 126 MHz) spectrum of 7.

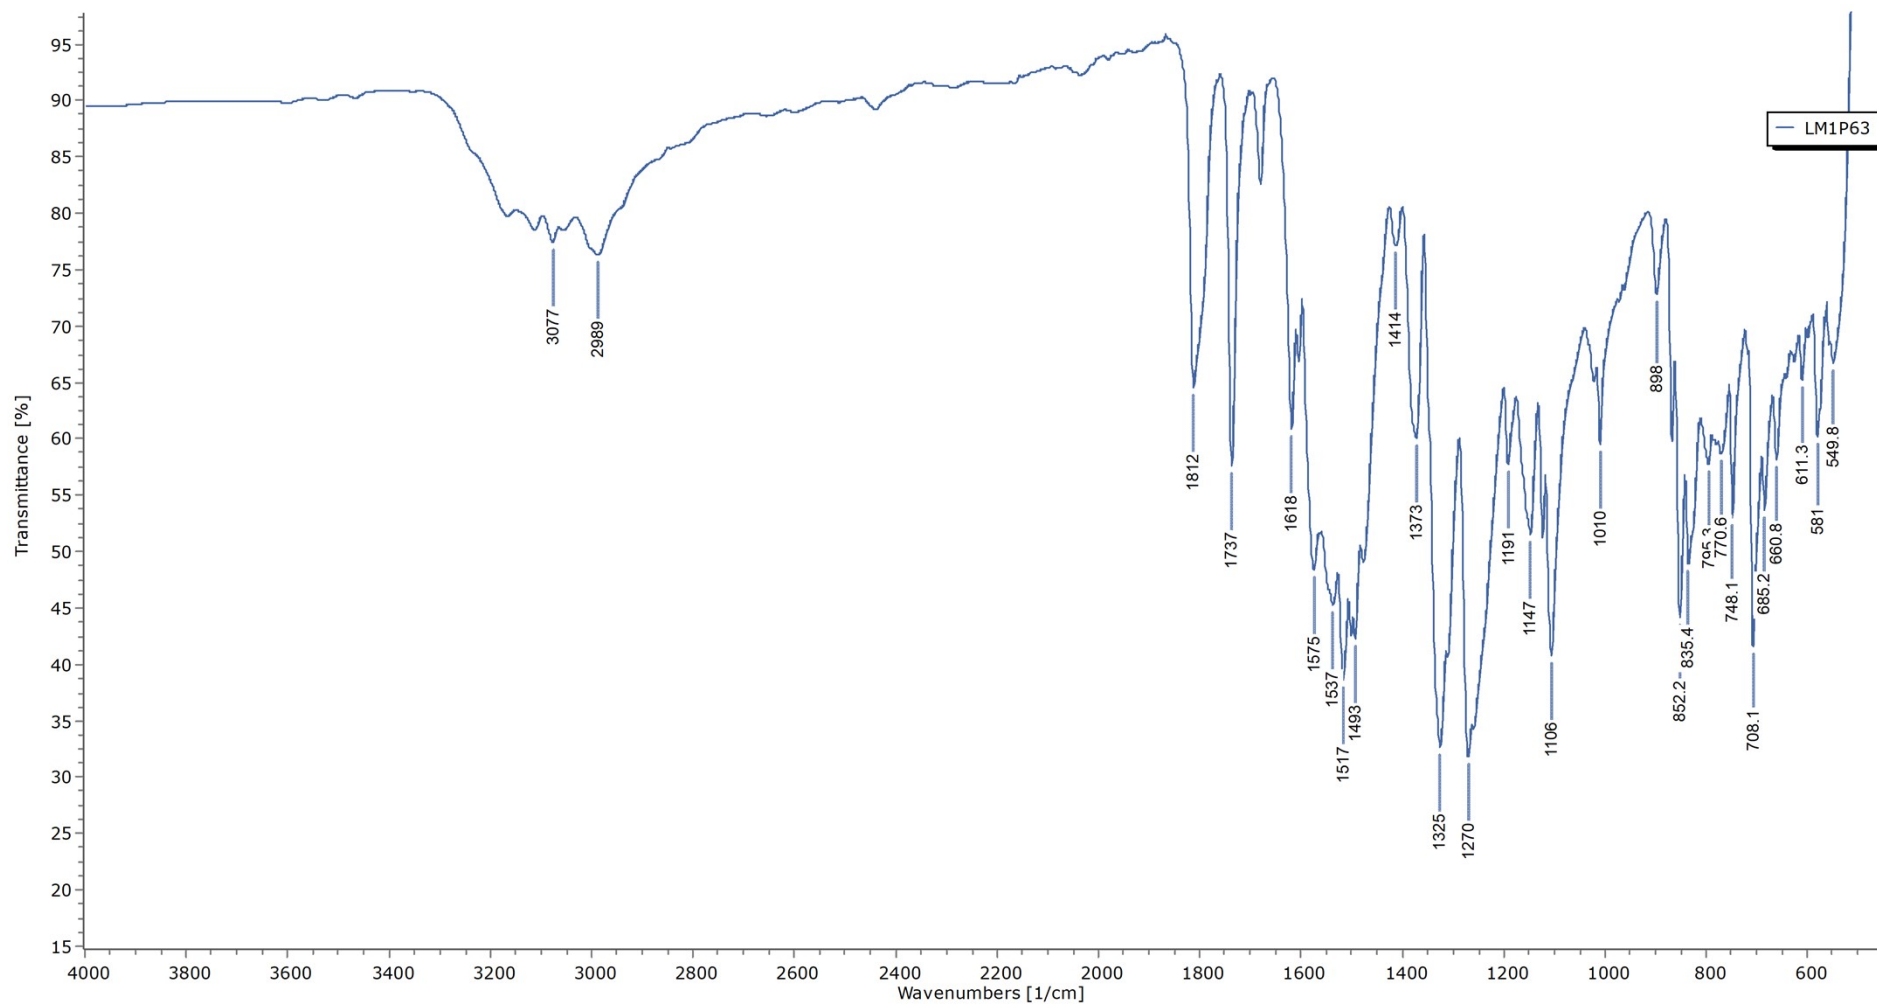

Figure S68. IR spectrum of 7.



**Compounds**

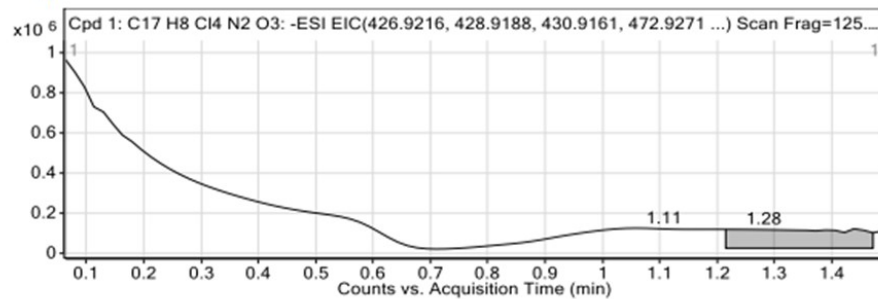

**Integration Peak List**

| Start | RT   | End  | Height | Area    |
|-------|------|------|--------|---------|
| 0.75  | 1.11 | 1.22 | 98506  | 1811788 |
| 1.22  | 1.28 | 1.47 | 91992  | 1385531 |

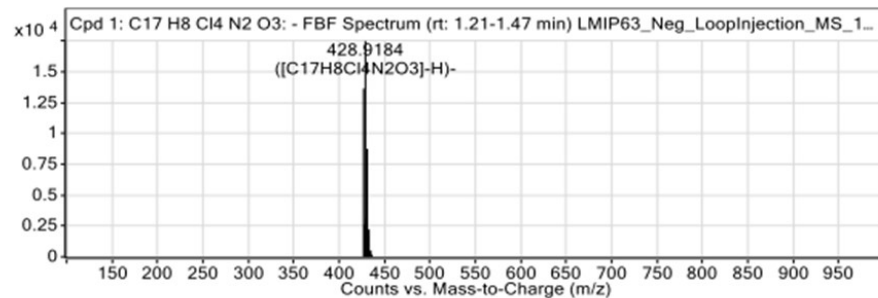

**Peak List**

| m/z      | z | Abund    | Formula      | Ion    |
|----------|---|----------|--------------|--------|
| 426.9213 | 1 | 13656.46 | C17H8Cl4N2O3 | (M-H)- |
| 427.9245 | 1 | 2656.83  | C17H8Cl4N2O3 | (M-H)- |
| 428.9184 | 1 | 17543.08 | C17H8Cl4N2O3 | (M-H)- |
| 429.9218 | 1 | 3160.57  | C17H8Cl4N2O3 | (M-H)- |
| 430.9172 | 1 | 8763.45  | C17H8Cl4N2O3 | (M-H)- |
| 431.92   | 1 | 1753.84  | C17H8Cl4N2O3 | (M-H)- |
| 432.9138 | 1 | 2221.39  | C17H8Cl4N2O3 | (M-H)- |
| 433.9161 | 1 | 420.11   | C17H8Cl4N2O3 | (M-H)- |
| 434.8979 | 1 | 514.83   | C17H8Cl4N2O3 | (M-H)- |
| 435.9007 | 1 | 176.8    | C17H8Cl4N2O3 | (M-H)- |

--- End Of Report ---

**Figure S69. HRMS of 7.**

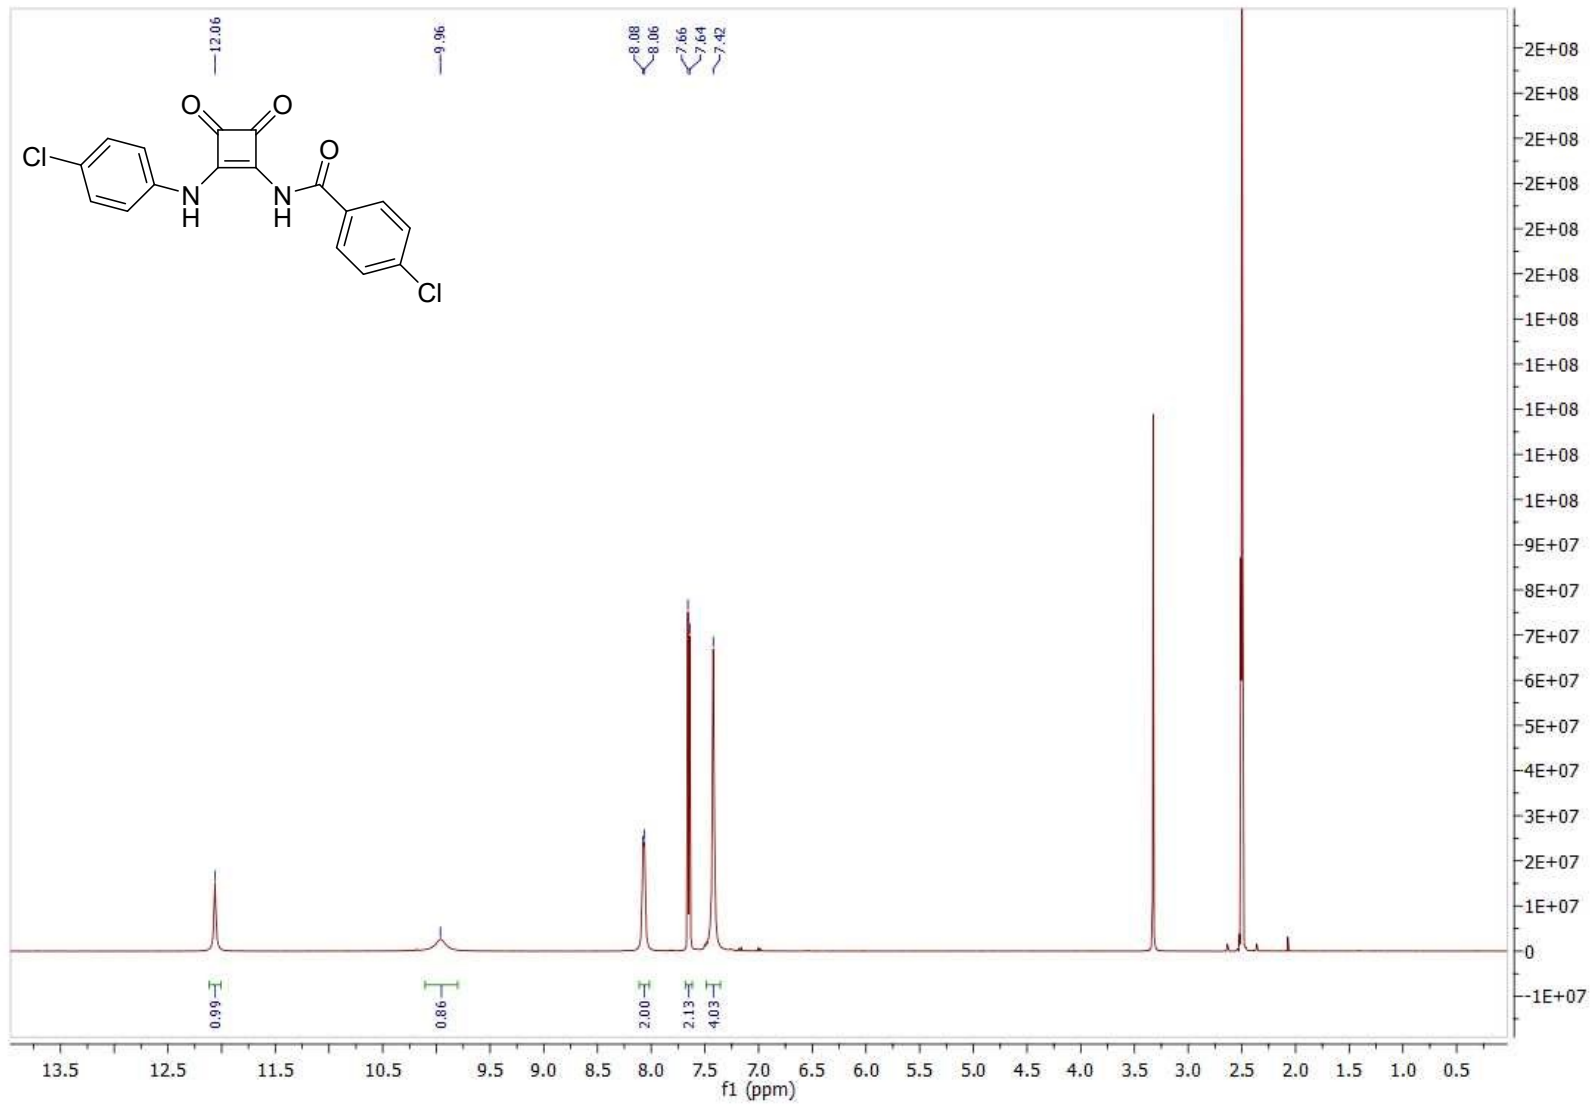

**Figure S70.**  $^1\text{H}$  NMR ( $\text{DMSO-}d_6$ , 500 MHz) spectrum of **8**.

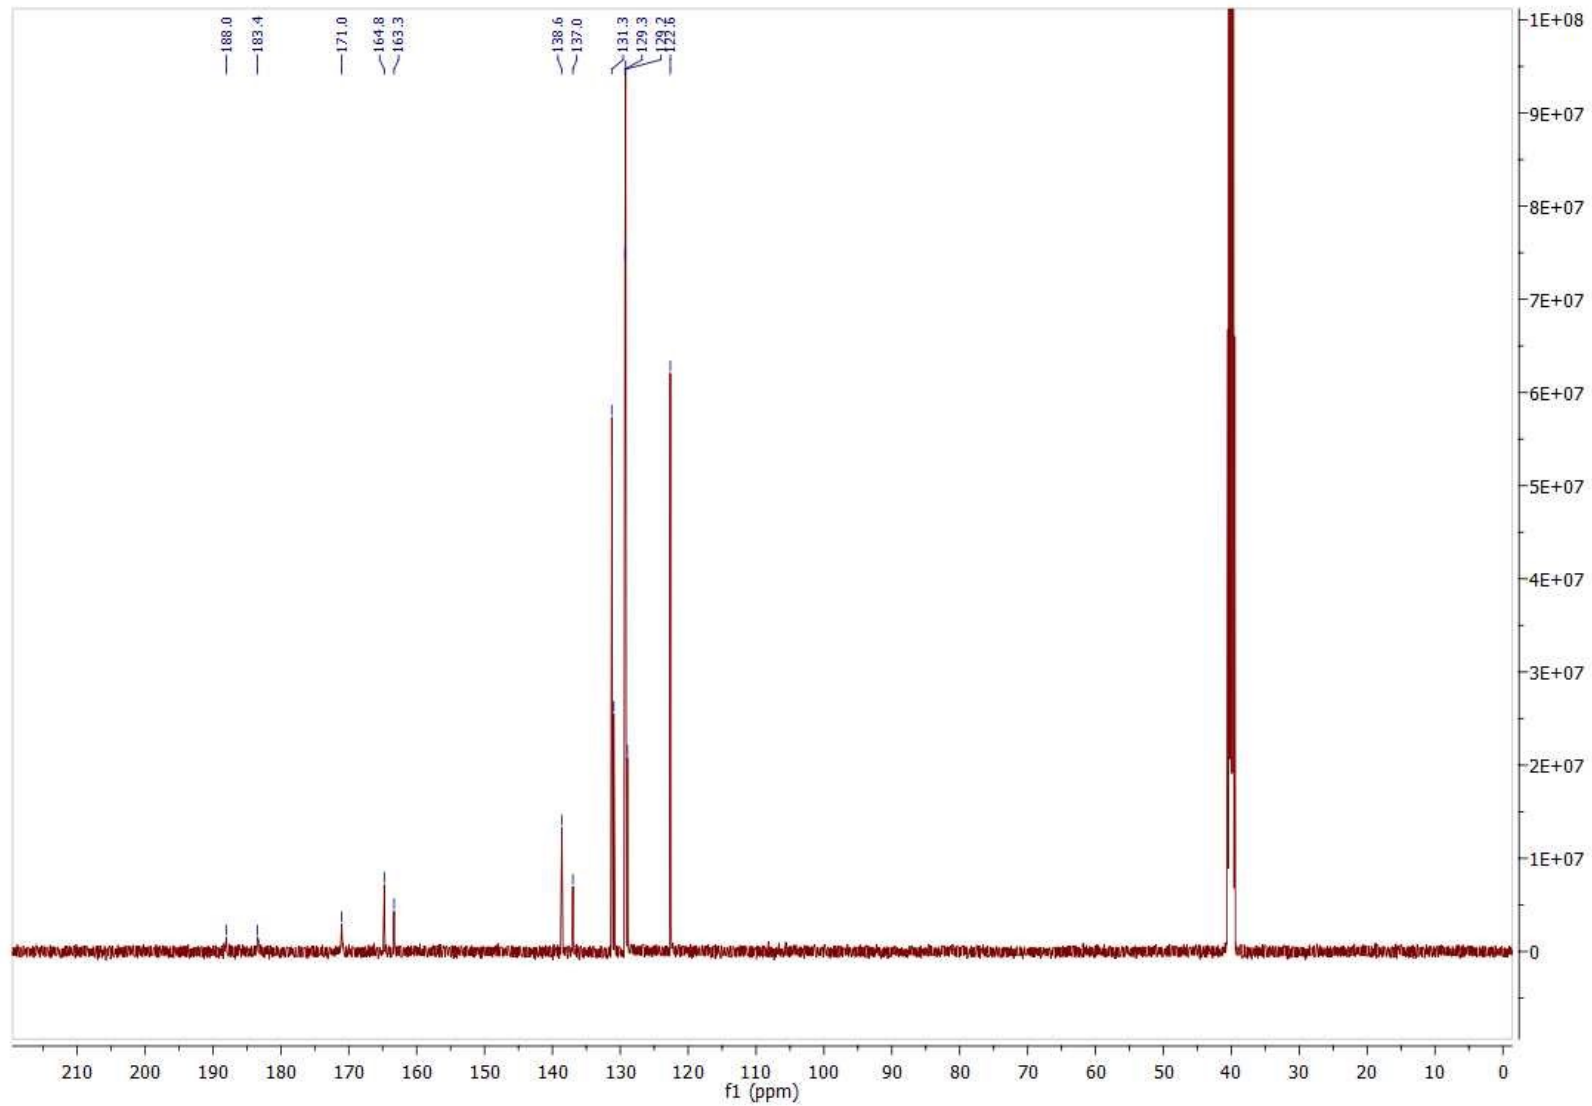

**Figure S71.**  $^{13}\text{C}$  NMR ( $\text{DMSO-}d_6$ , 126 MHz) spectrum of **8**.

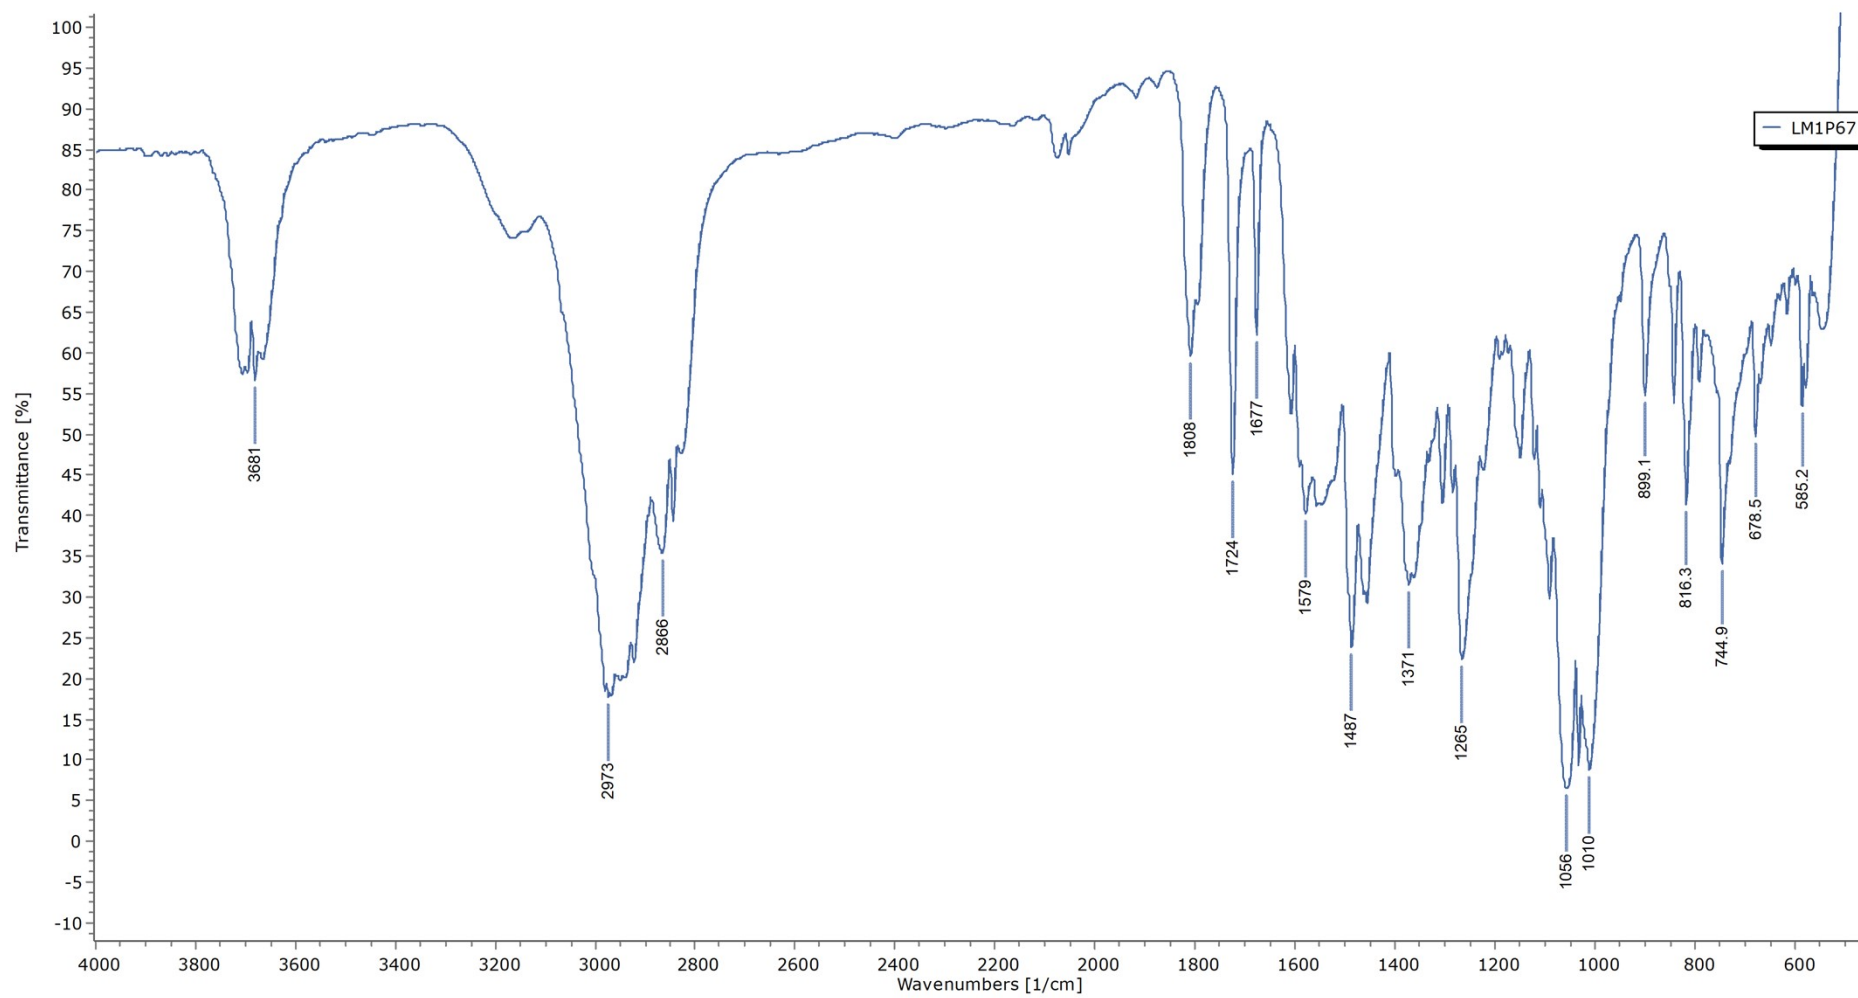

**Figure S72.** IR spectrum of **8**.

**Compounds**

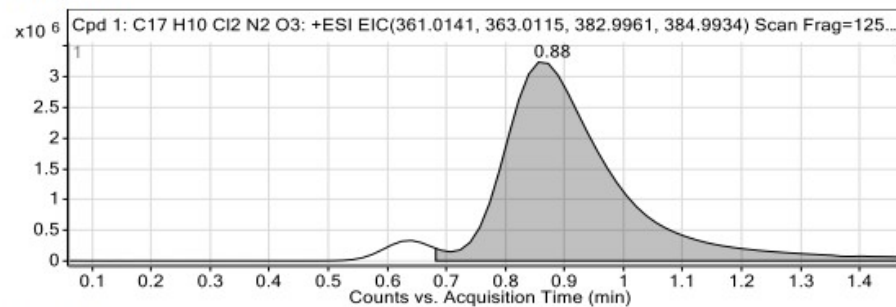

**Integration Peak List**

| Start | RT   | End  | Height  | Area     |
|-------|------|------|---------|----------|
| 0.68  | 0.88 | 1.47 | 3052489 | 40426406 |

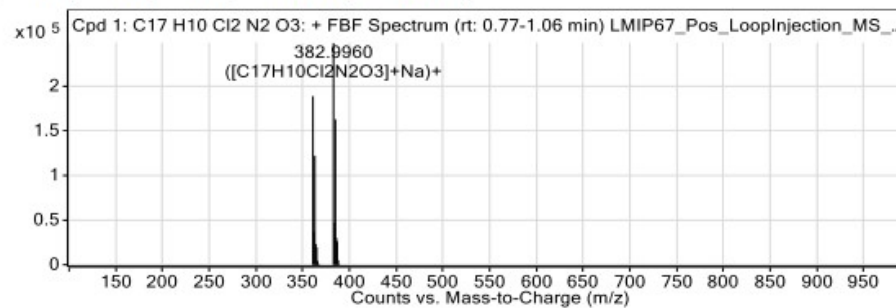

**Peak List**

| m/z      | z | Abund     | Formula       | Ion     |
|----------|---|-----------|---------------|---------|
| 361.014  | 1 | 188503.16 | C17H10Cl2N2O3 | (M+H)+  |
| 362.0172 | 1 | 37399.45  | C17H10Cl2N2O3 | (M+H)+  |
| 363.0113 | 1 | 121920.34 | C17H10Cl2N2O3 | (M+H)+  |
| 364.0142 | 1 | 23217.99  | C17H10Cl2N2O3 | (M+H)+  |
| 365.009  | 1 | 19490.81  | C17H10Cl2N2O3 | (M+H)+  |
| 382.996  | 1 | 248171.25 | C17H10Cl2N2O3 | (M+Na)+ |
| 383.9989 | 1 | 47022.43  | C17H10Cl2N2O3 | (M+Na)+ |
| 384.9934 | 1 | 162578.2  | C17H10Cl2N2O3 | (M+Na)+ |
| 385.9962 | 1 | 30132.79  | C17H10Cl2N2O3 | (M+Na)+ |
| 386.991  | 1 | 26273.02  | C17H10Cl2N2O3 | (M+Na)+ |

--- End Of Report ---

**Figure S73. HRMS of 8.**

## UV/Vis-Spectrometric $pK_a$ Determination

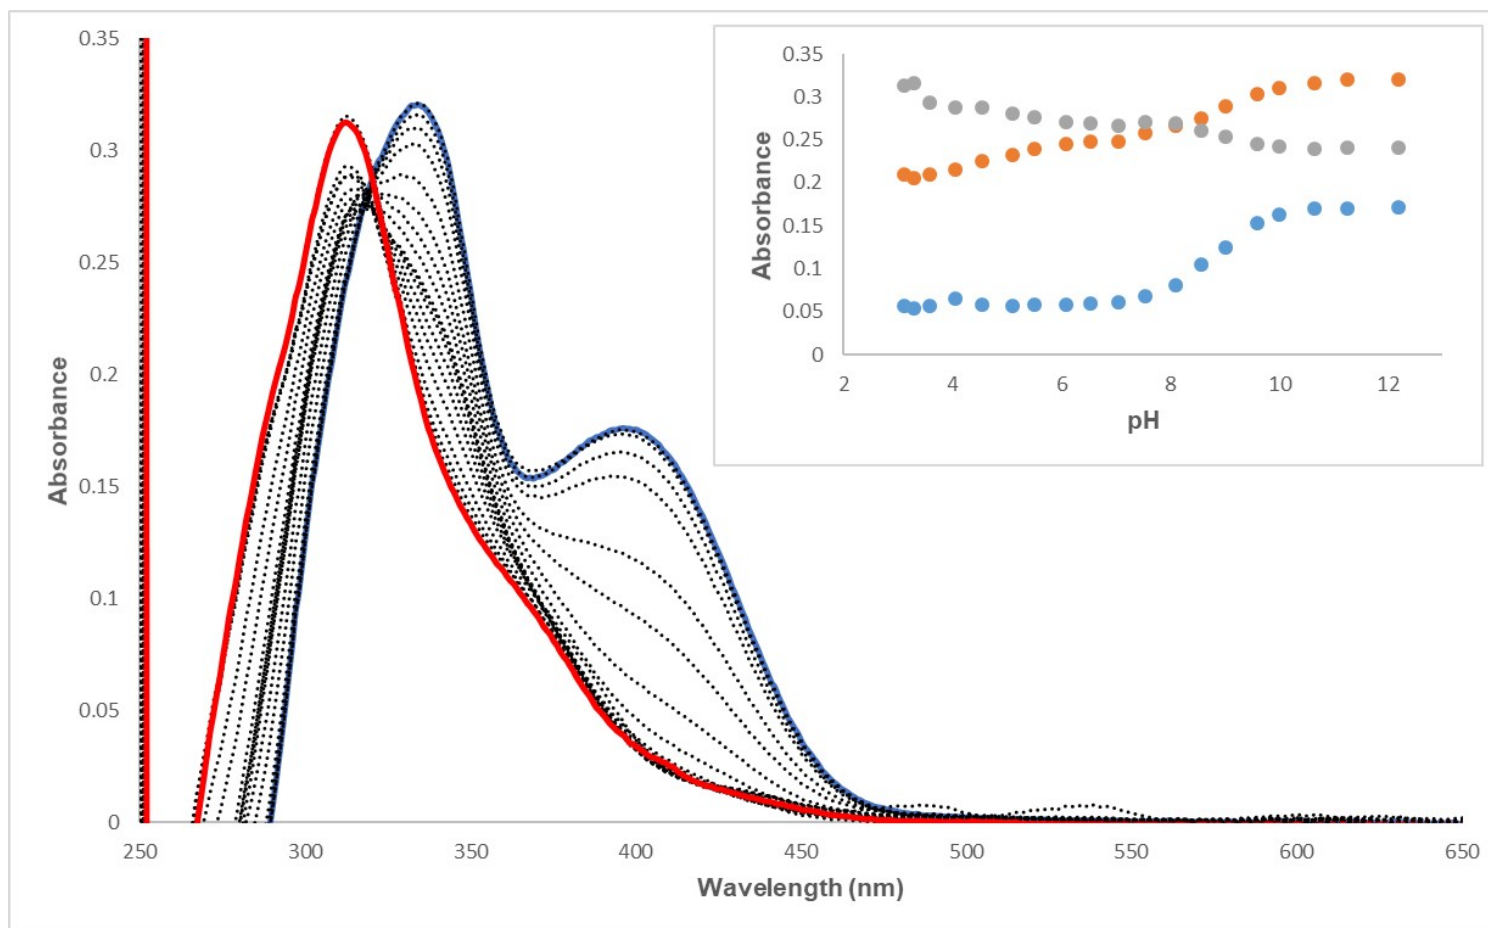

**Figure S74.** Absorption spectra taken over the course of a pH-spectrophotometric titration of **1** (10  $\mu\text{M}$ ) in an DMSO–water mixture (9/1 v/v; in presence of 0.1 M TBAPF6) pH 3.29 (red), pH 12.18 (blue). Inset: Comparison plots of absorbance at 312 nm (grey), 332 nm (orange), 312 nm (blue) vs. pH.

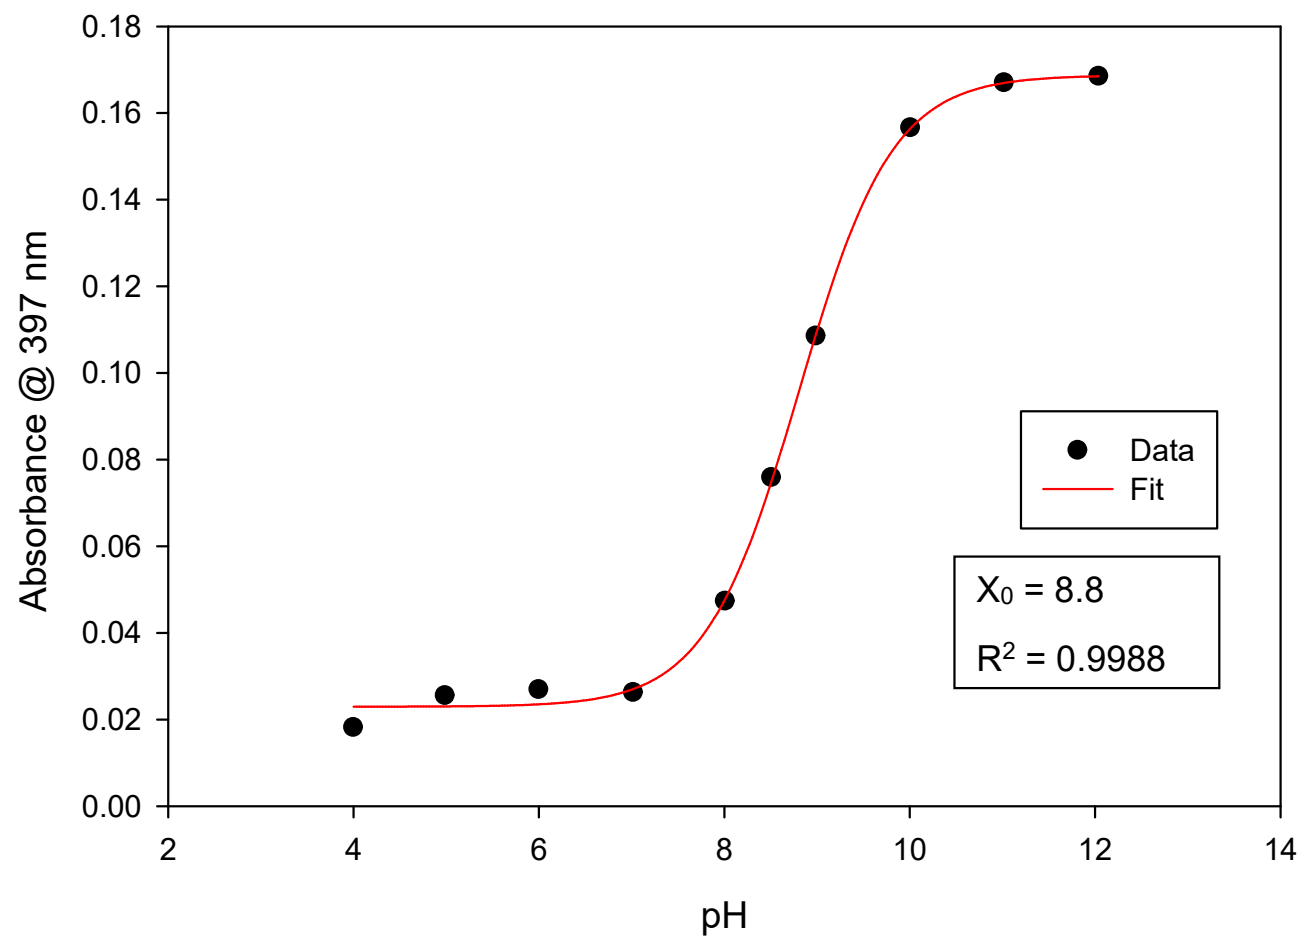

**Figure S75.** Four parameter sigmoid curve fit with the point of inflexion ( $X_0$ ) corresponding to the  $pK_a$  value for **1**.

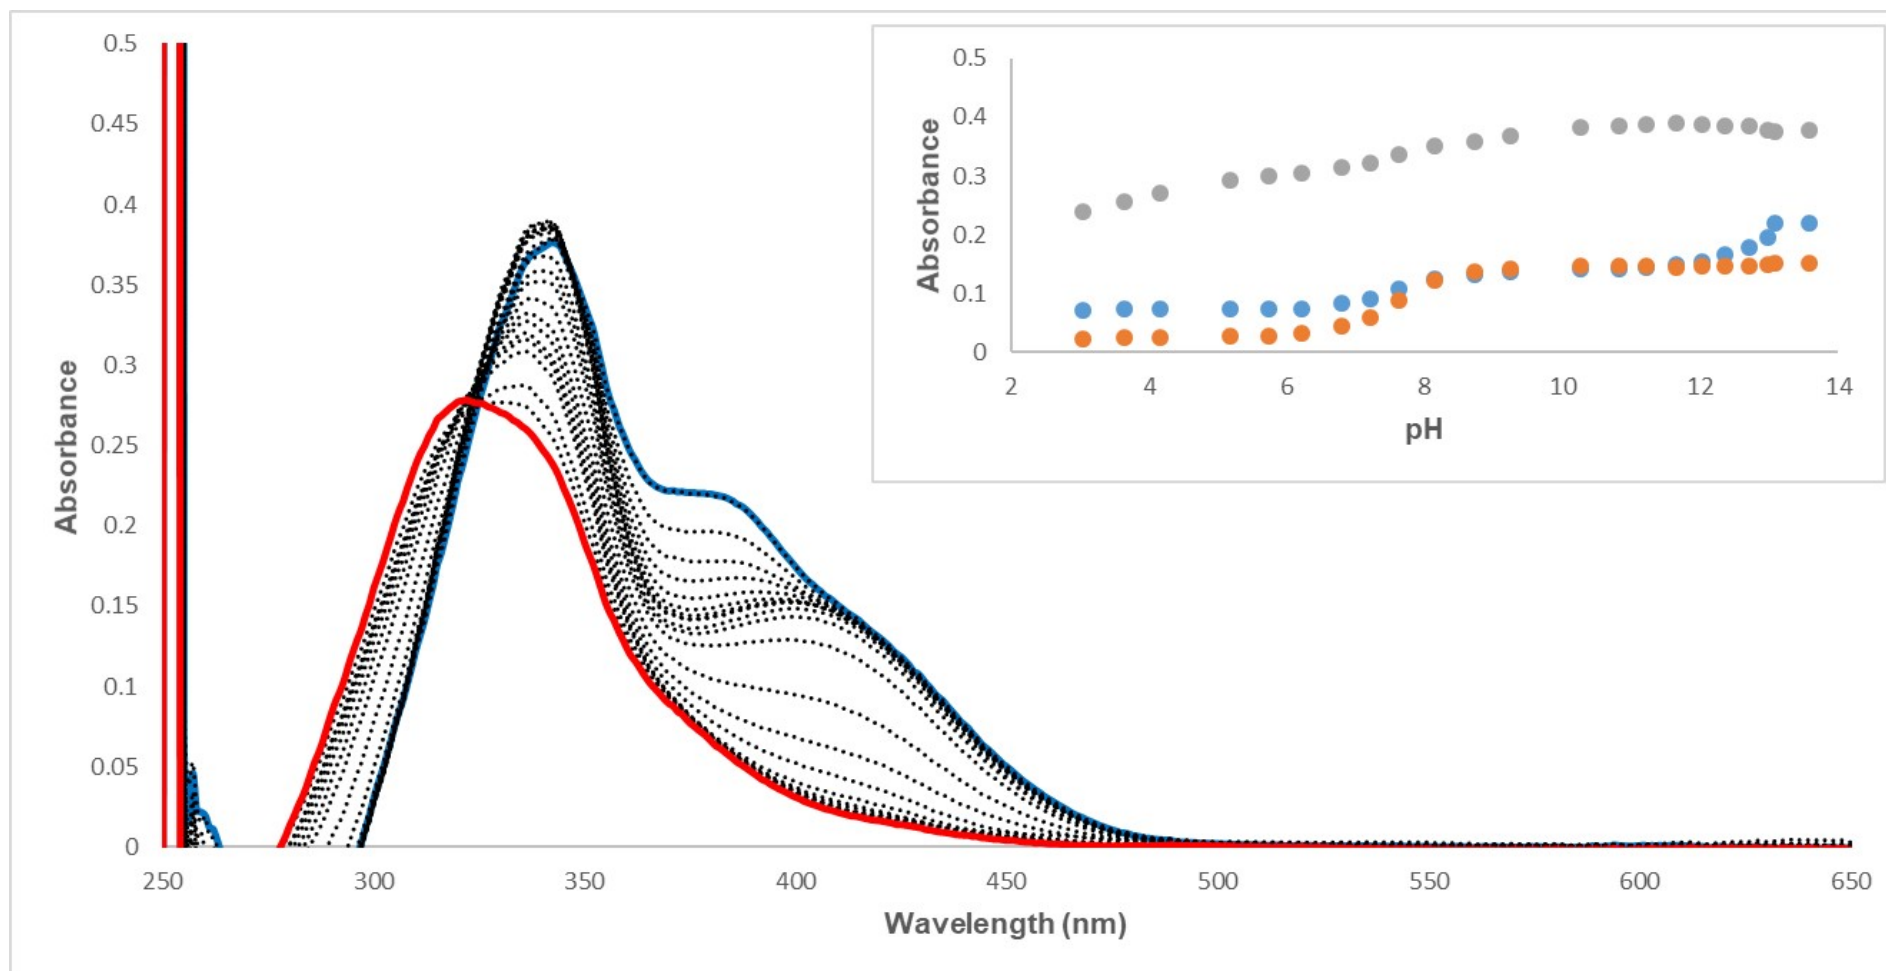

**Figure S76.** Absorption spectra taken over the course of a pH-spectrophotometric titration of **2** ( $10\ \mu\text{M}$ ) in an DMSO–water mixture (9/1 v/v; in presence of  $0.1\ \text{M}$  TBAPF6) pH 3.04 (red), pH 13.08 (blue). Inset: Comparison plots of absorbance at 342 nm (grey), 410 nm (orange), 378 nm (blue) vs. pH.



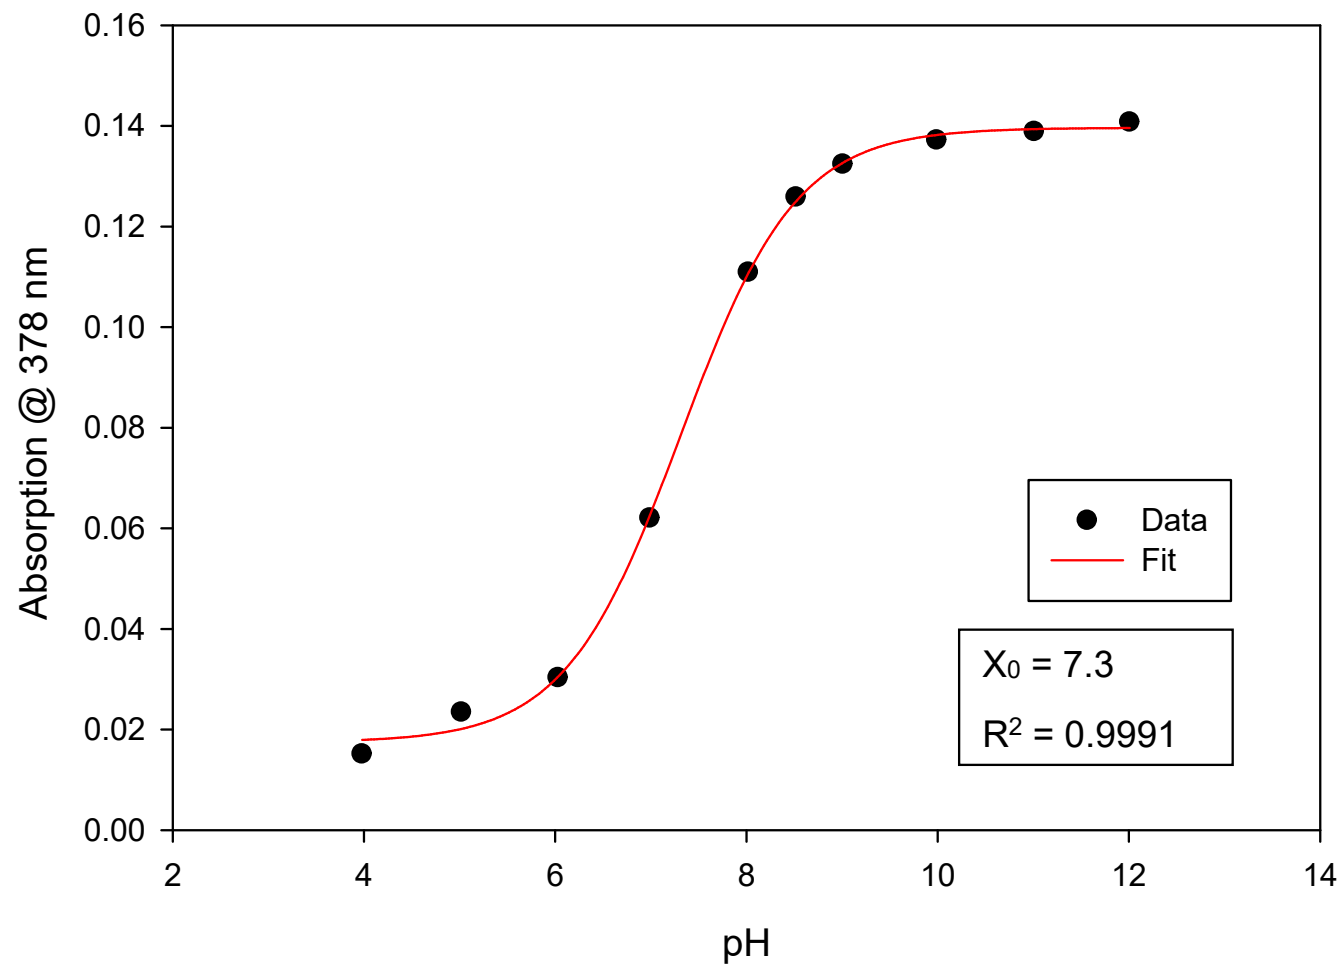

**Figure S77.** Four parameter sigmoid curve fit with the point of inflexion ( $X_0$ ) corresponding to the  $pK_a$  value for **2**.

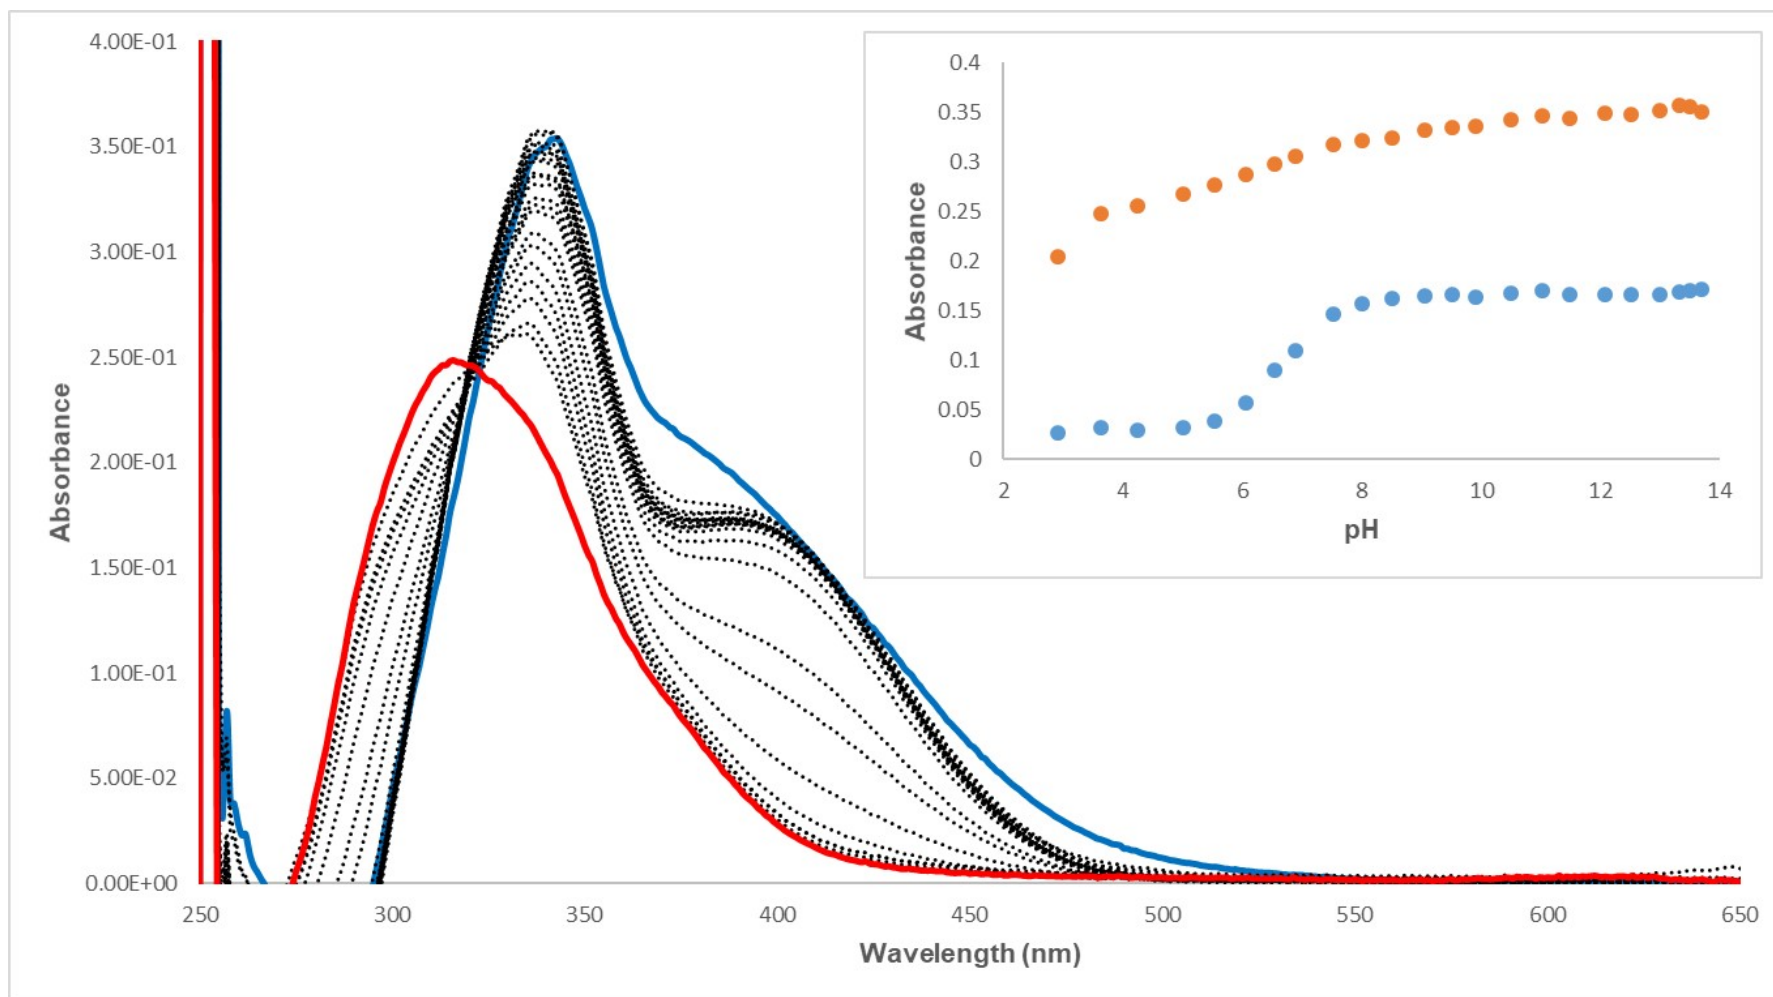

**Figure S78.** Absorption spectra taken over the course of a pH-spectrophotometric titration of **3** (10  $\mu$ M) in an DMSO–water mixture (9/1 v/v; in presence of 0.1 M TBAPF6) pH 2.90 (red), pH 12.46 (blue). Inset: Comparison plots of absorbance at 340 nm (orange) and 401 nm (blue) vs. pH.

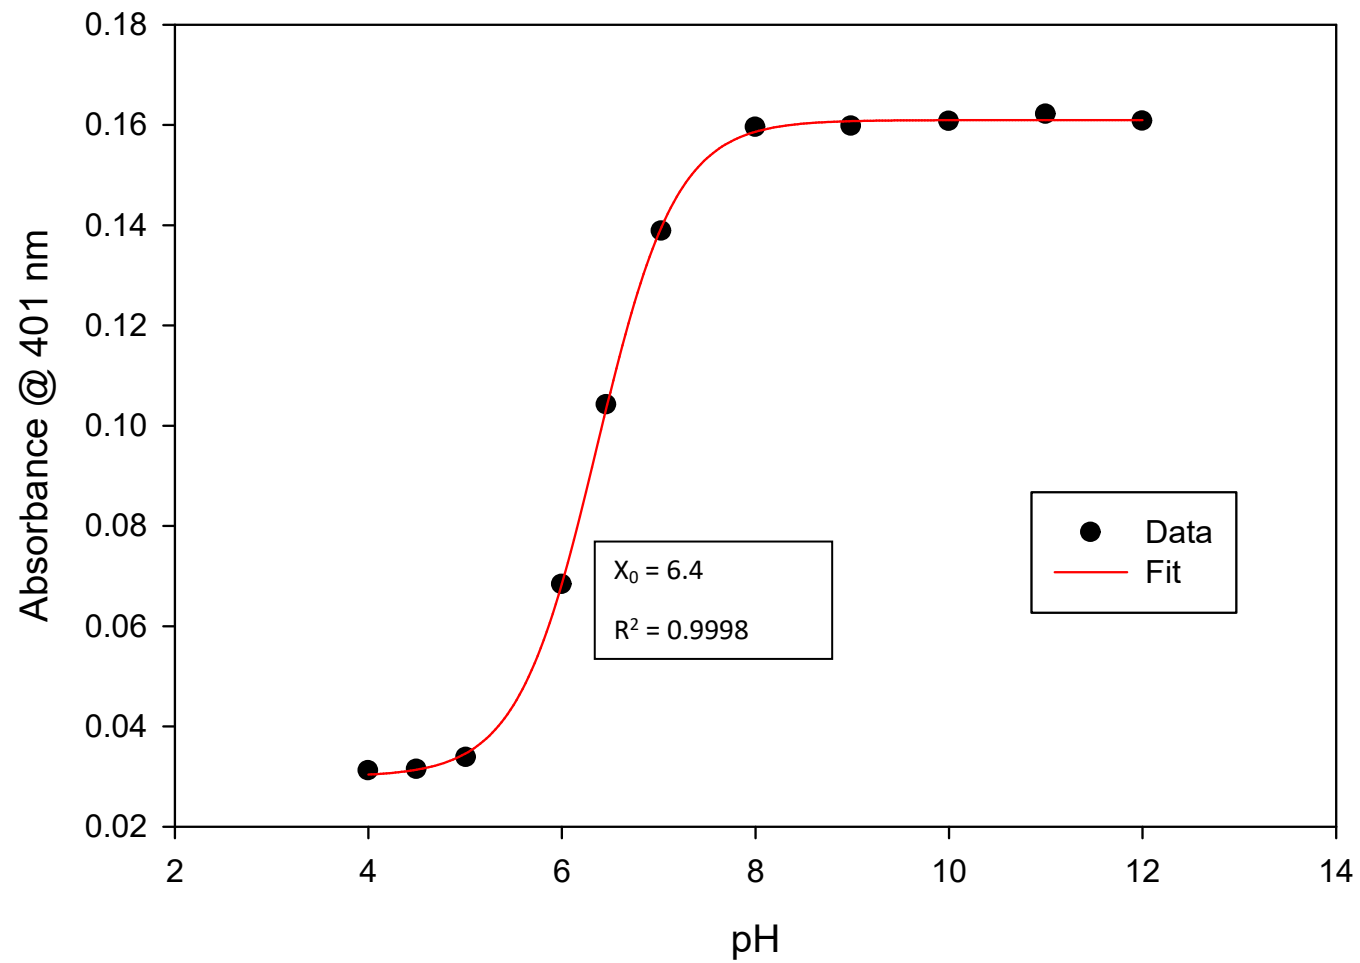

**Figure S79.** Four parameter sigmoid curve fit with the point of inflexion ( $X_0$ ) corresponding to the  $pK_a$  value for **3**.

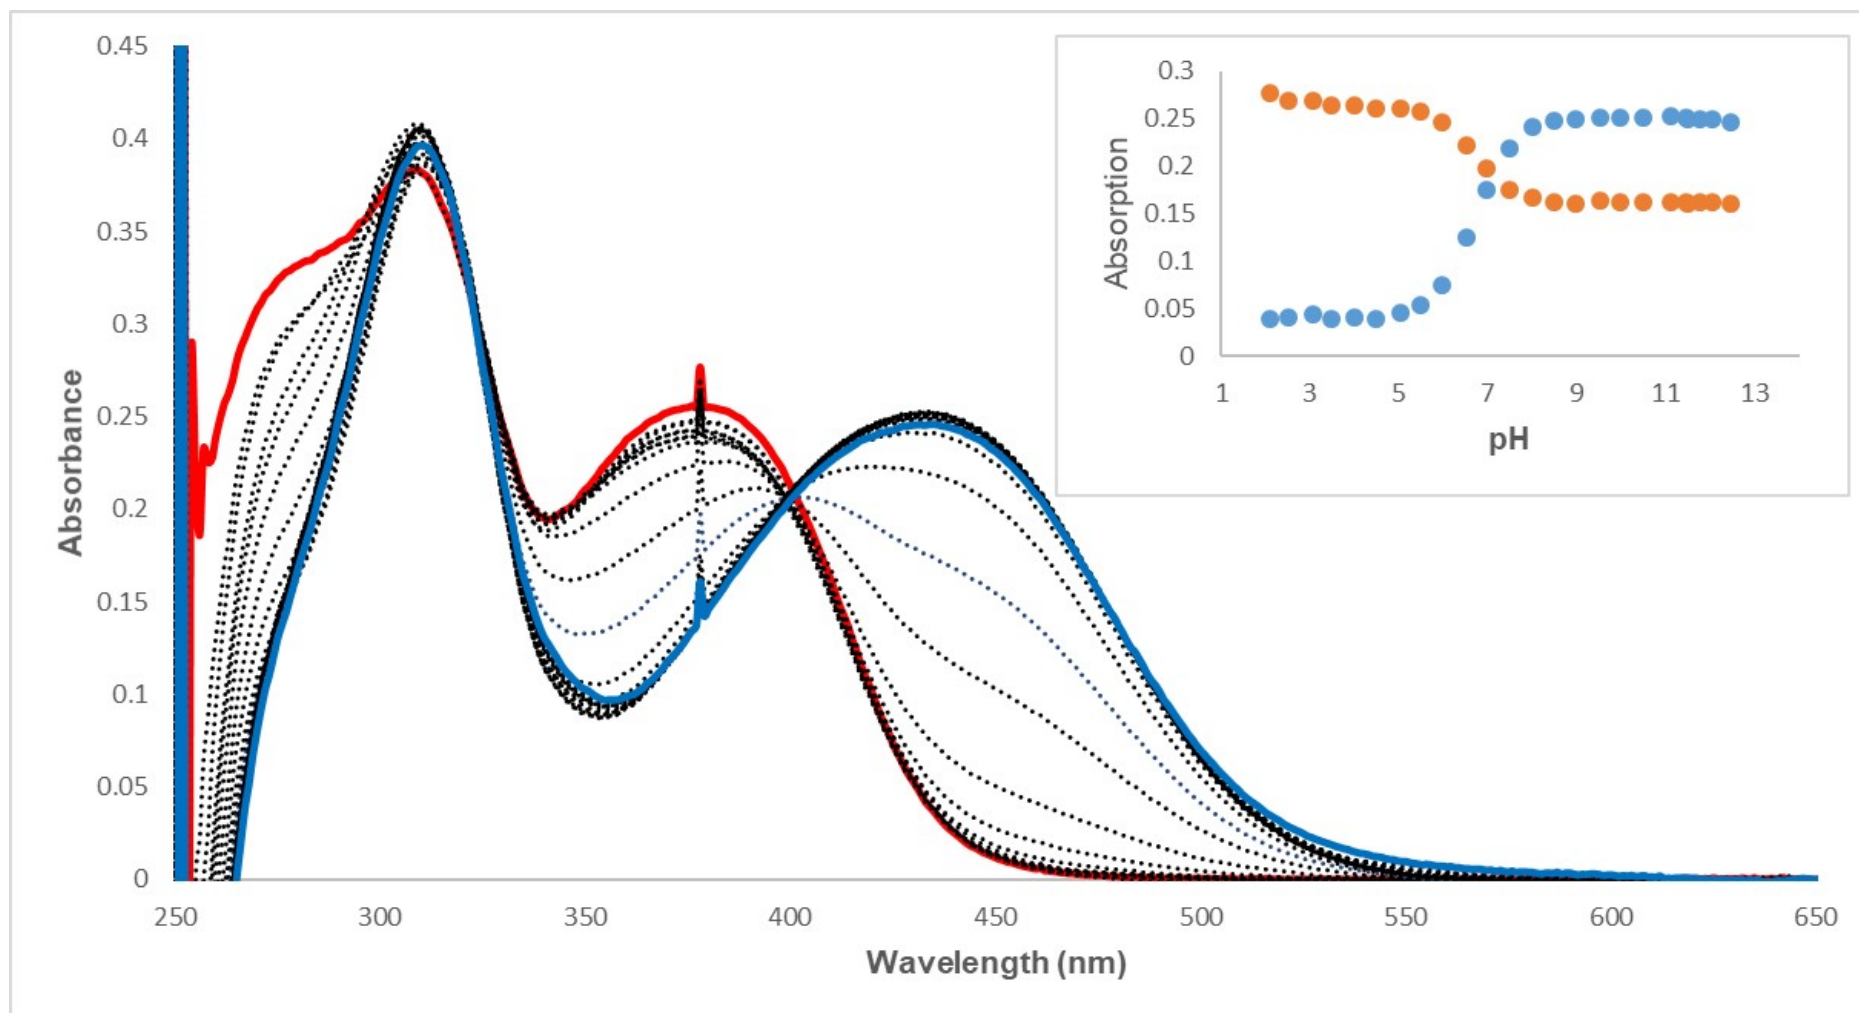

**Figure S80.** Absorption spectra taken over the course of a pH-spectrophotometric titration of **4** (10  $\mu\text{M}$ ) in an DMSO–water mixture (9/1 v/v; in presence of 0.1 M TBAPF6) pH 2.08 (red), pH 13.70 (blue). Inset: Comparison plots of absorbance at 378 nm (orange) and 434 nm (blue) vs. pH.

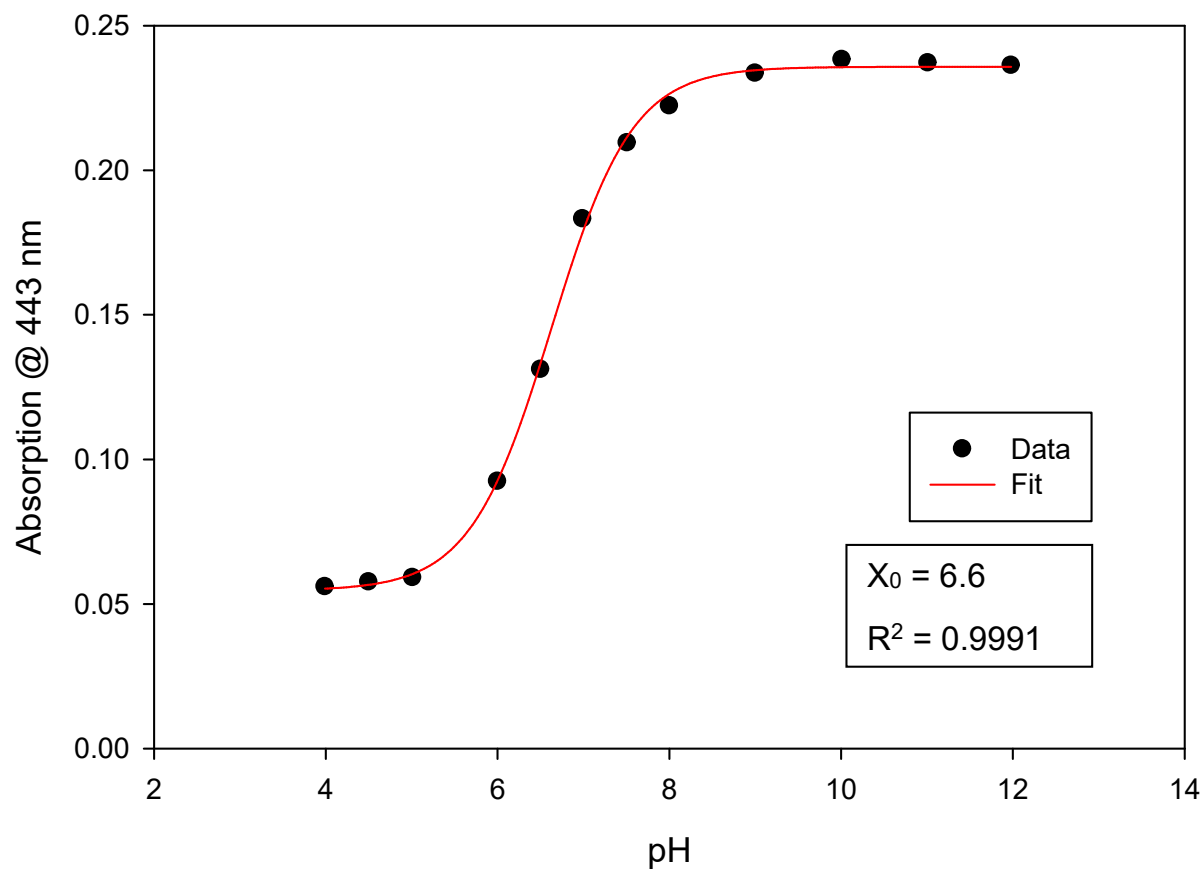

**Figure S81.** Four parameter sigmoid curve fit with the point of inflexion ( $X_0$ ) corresponding to the  $pK_a$  value for **4**.

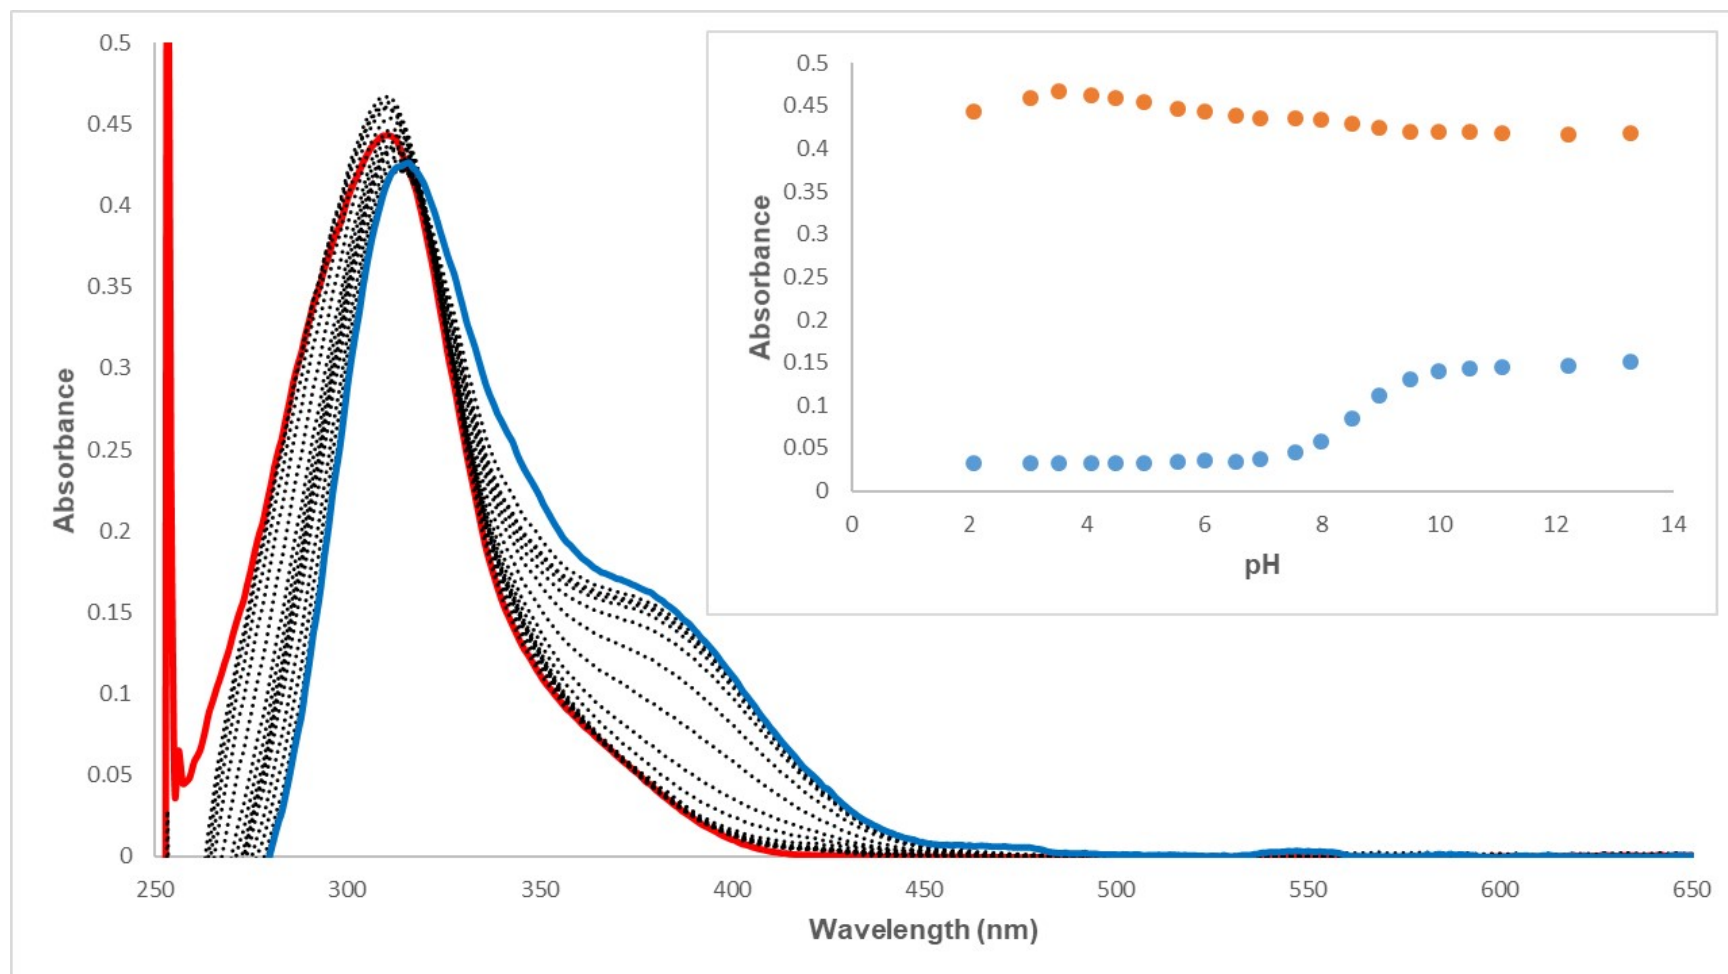

**Figure S82.** Absorption spectra taken over the course of a pH-spectrophotometric titration of **5** ( $10\ \mu\text{M}$ ) in an DMSO–water mixture (9/1 v/v; in presence of  $0.1\ \text{M}$  TBAPF6) pH 2.08 (red), pH 13.27 (blue). Inset: Comparison plots of absorbance at 311 nm (orange) and 385 nm (blue) vs. pH.

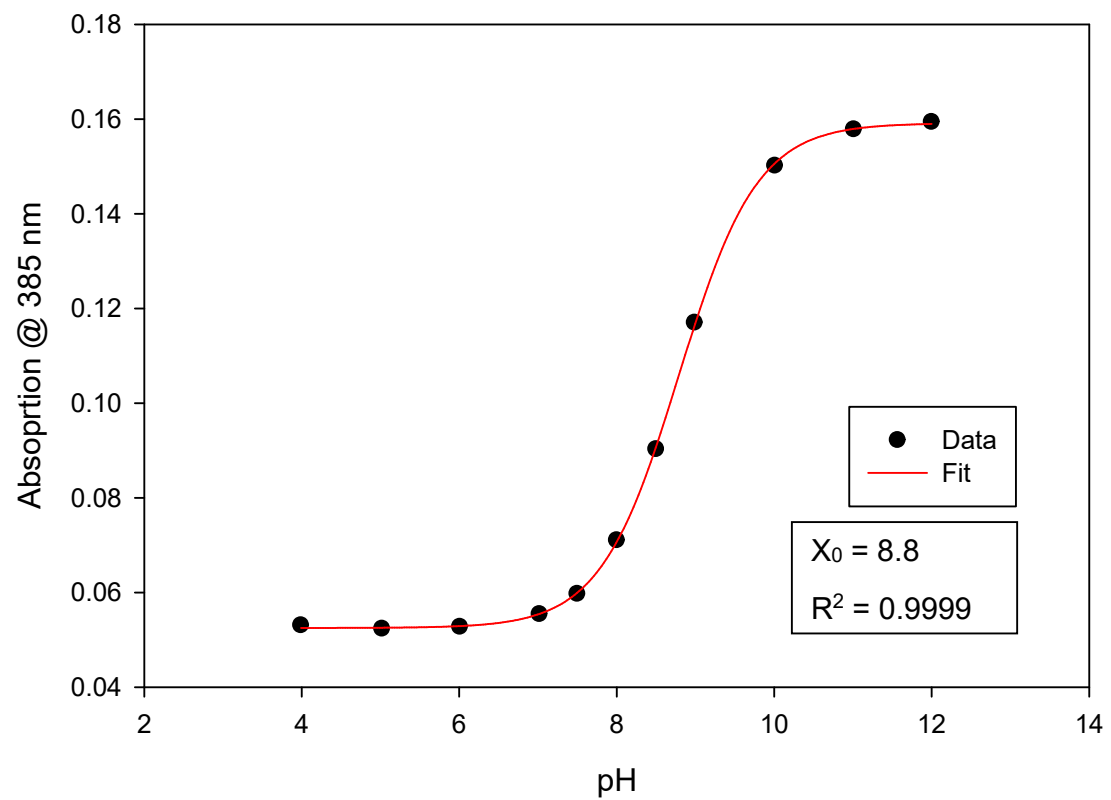

**Figure S83.** Four parameter sigmoid curve fit with the point of inflexion ( $X_0$ ) corresponding to the  $pK_a$  value for 5.

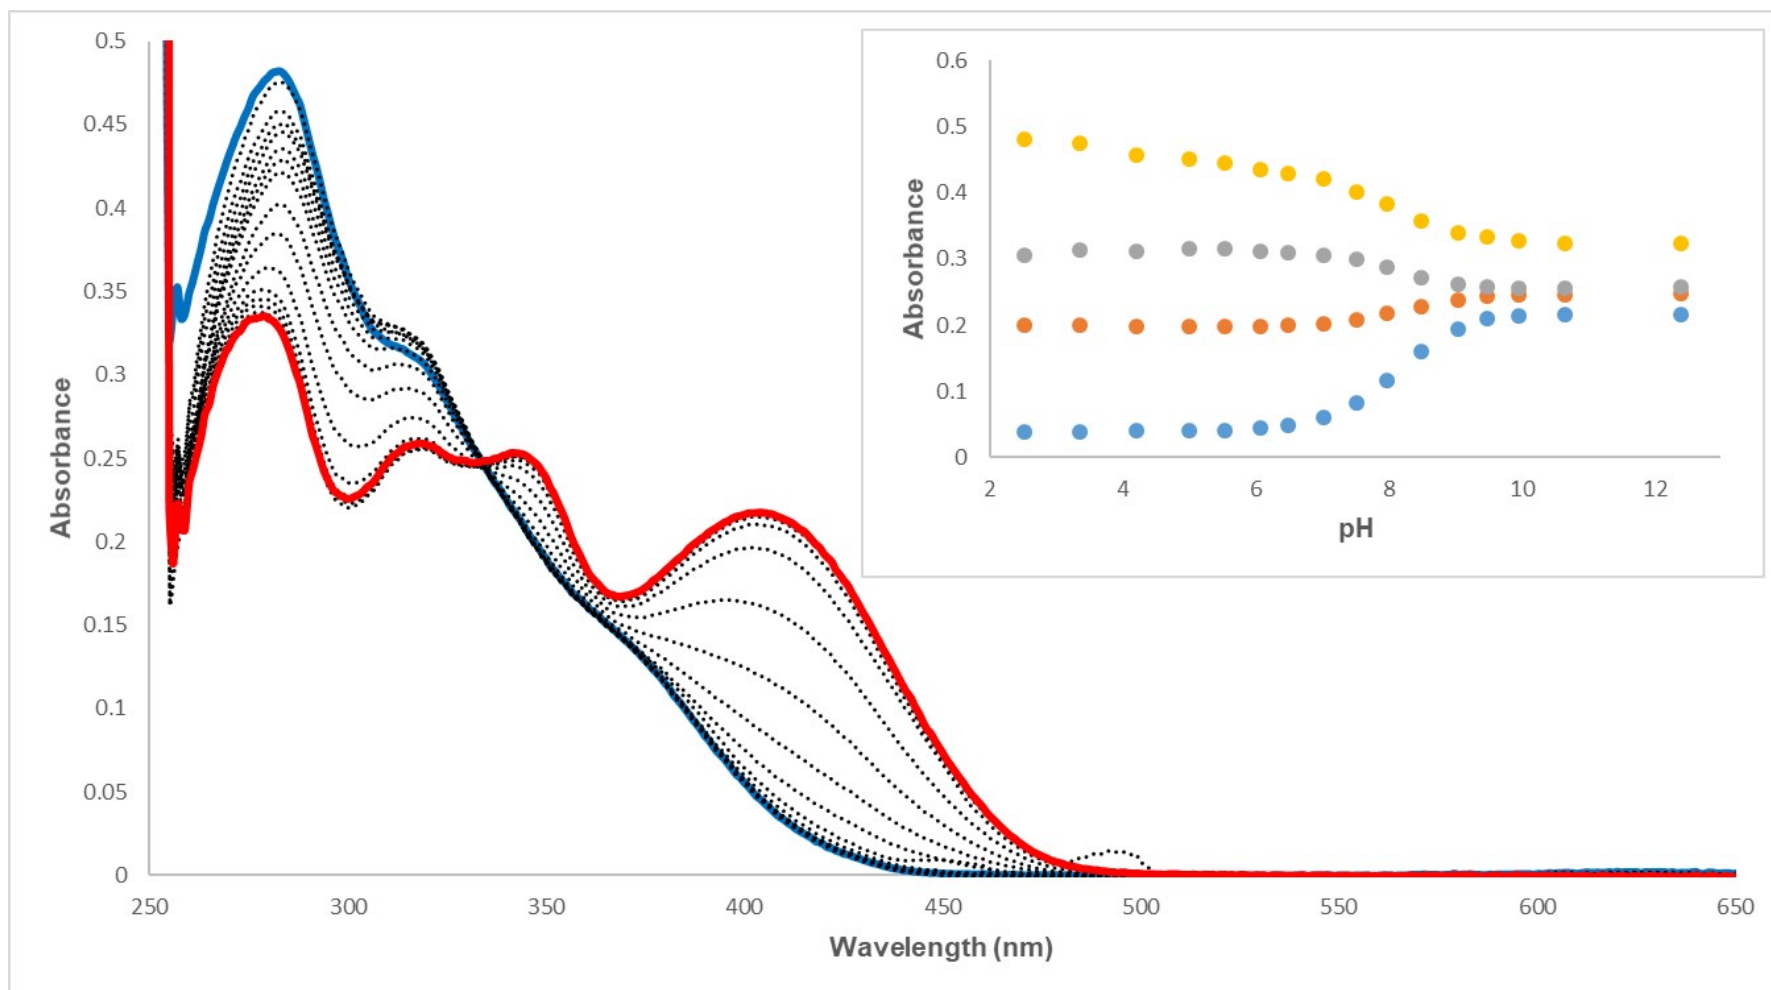

**Figure S84.** Absorption spectra taken over the course of a pH-spectrophotometric titration of **6** (10 μM) in an DMSO–water mixture (9/1 v/v; in presence of 0.1 M TBAPF6) pH 2.52 (red), pH 12.40 (blue). Inset: Comparison plots of absorbance at 284 nm (yellow), 320 nm (grey), 347 nm (orange), and 407 nm (blue) vs. pH.



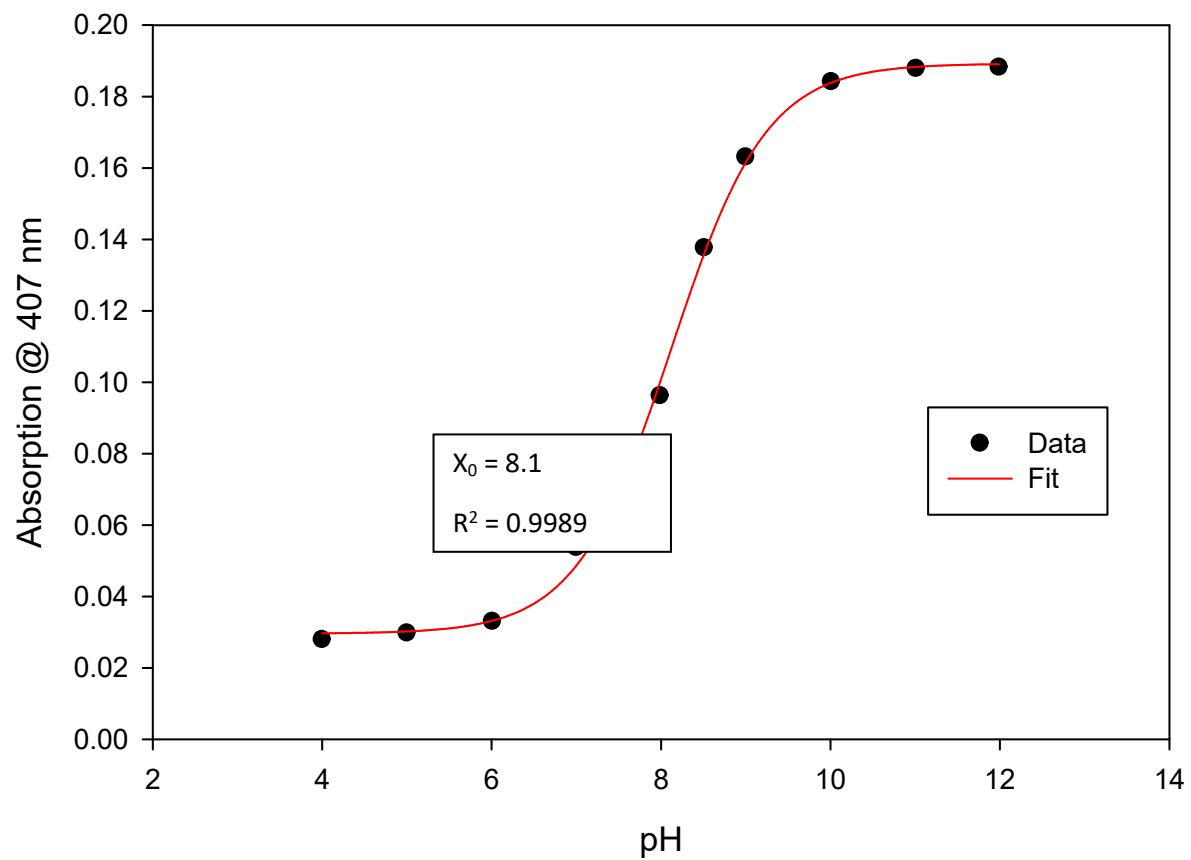

**Figure S85.** Four parameter sigmoid curve fit with the point of inflexion ( $X_0$ ) corresponding to the  $pK_a$  value for 6.

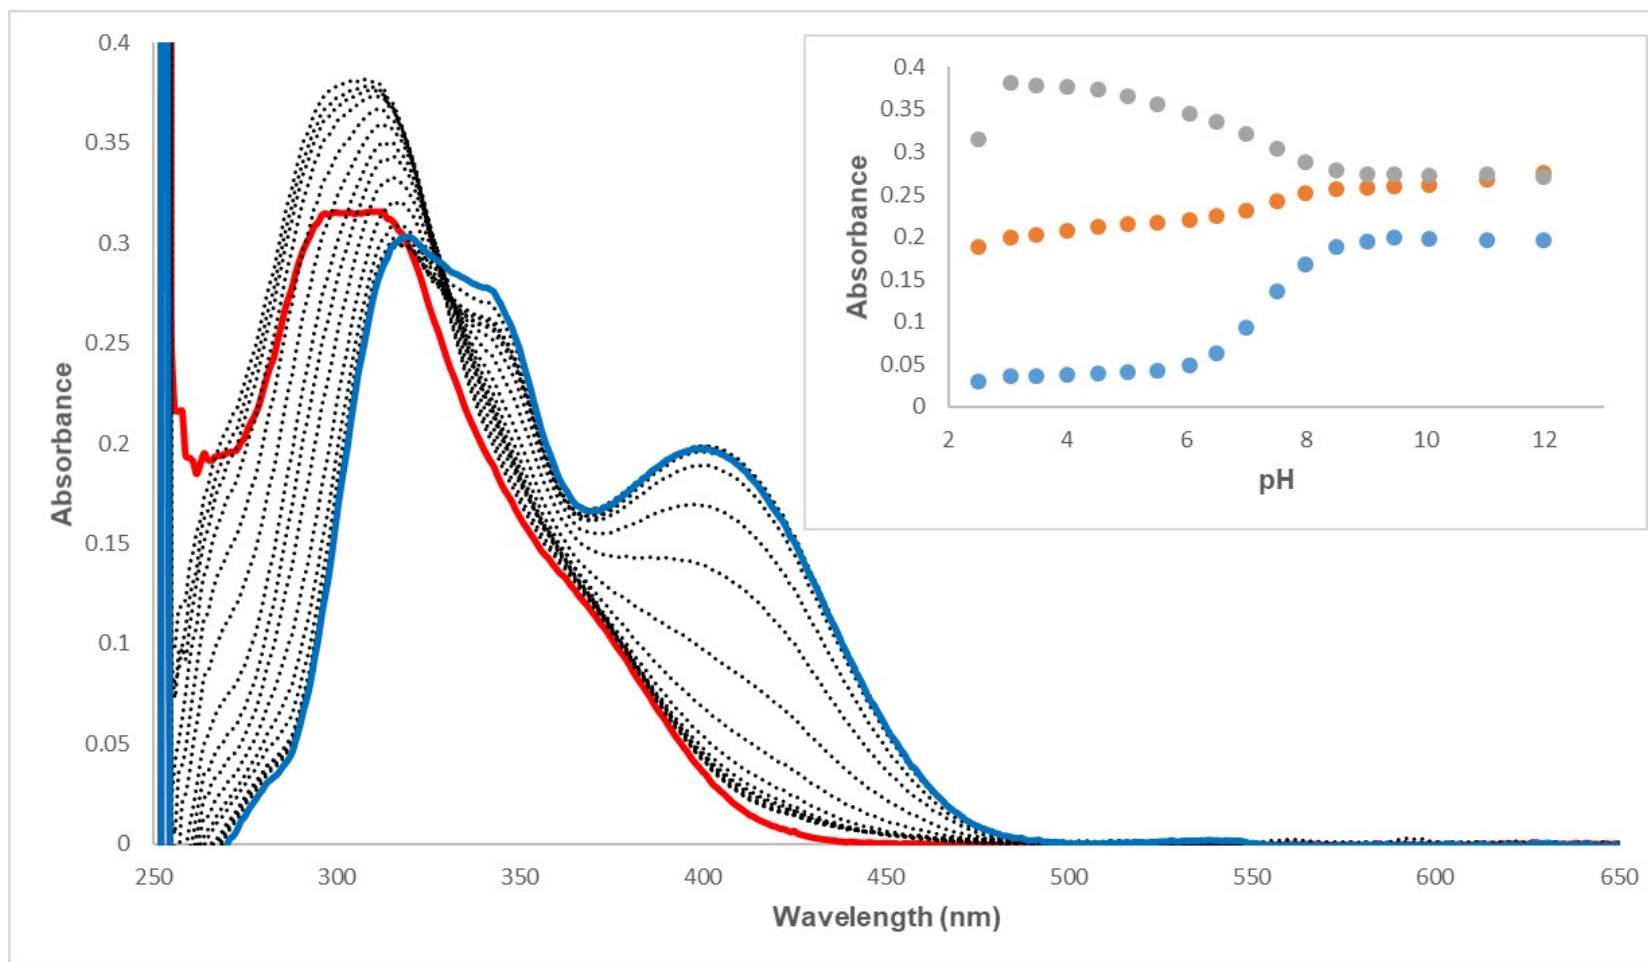

**Figure S86.** Absorption spectra taken over the course of a pH-spectrophotometric titration of **7** (10  $\mu\text{M}$ ) in an DMSO–water mixture (9/1 v/v; in presence of 0.1 M TBAPF6) pH 2.50 (red), pH 11.98 (blue). Inset: Comparison plots of absorbance at 310 nm (grey), 343 nm (orange), and 403 nm (blue) vs. pH.

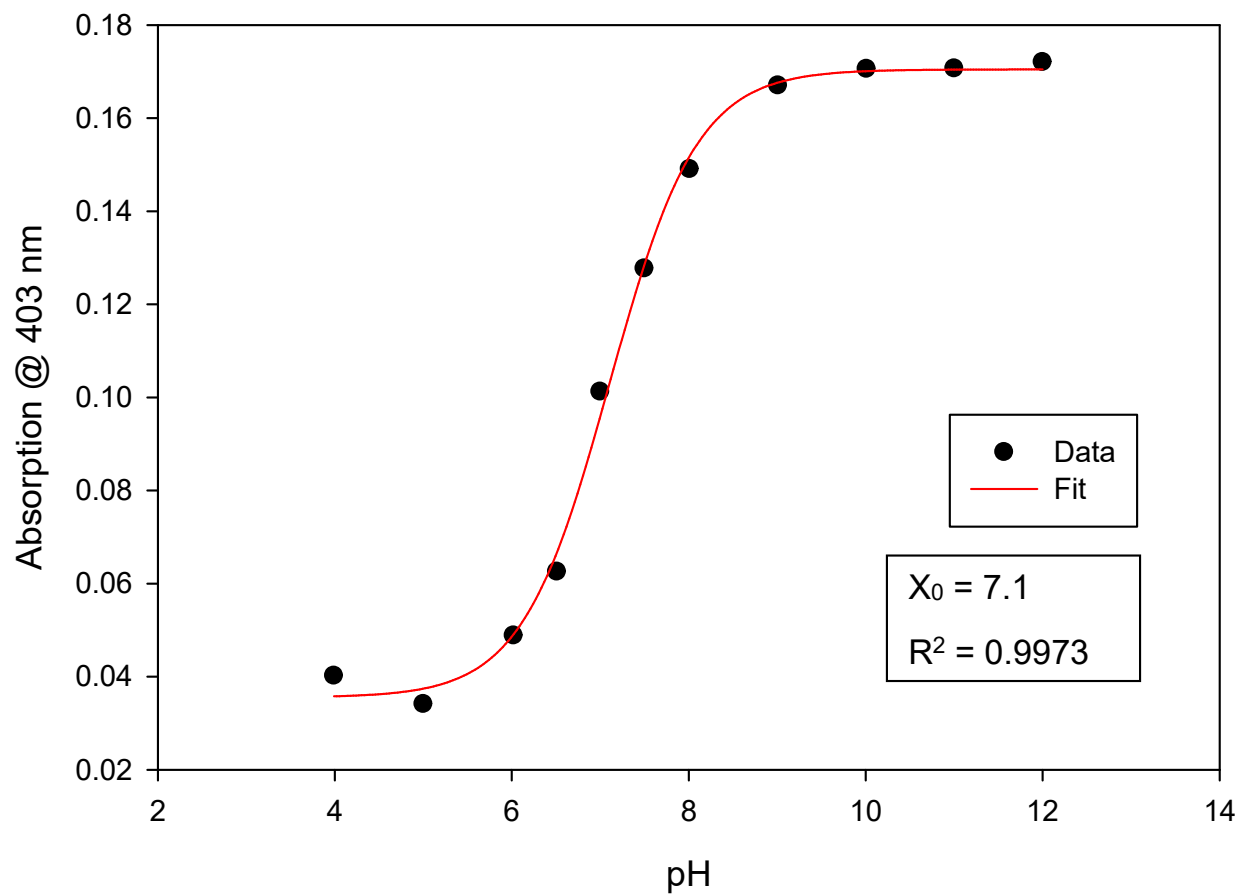

**Figure S87.** Four parameter sigmoid curve fit with the point of inflexion ( $X_0$ ) corresponding to the  $pK_a$  value for 7.

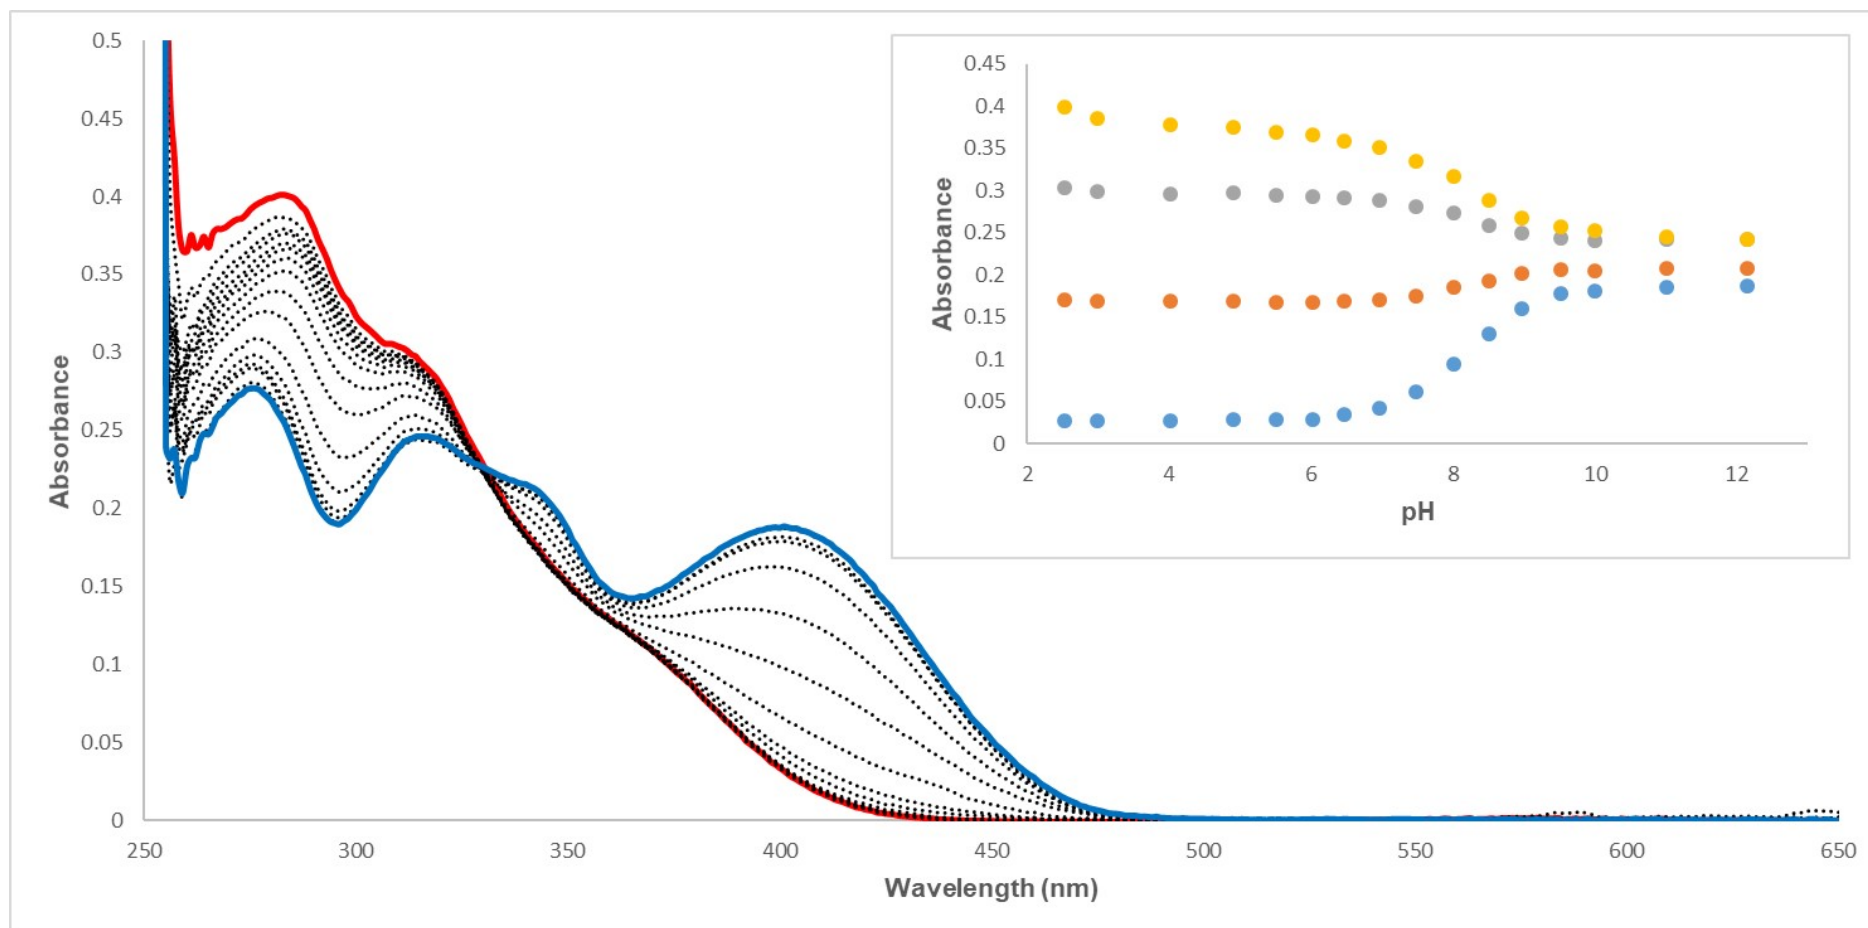

**Figure S88.** Absorption spectra taken over the course of a pH-spectrophotometric titration of **8** (10 μM) in an DMSO–water mixture (9/1 v/v; in presence of 0.1 M TBAPF6) pH 2.53 (red), pH 12.14 (blue). Inset: Comparison plots of absorbance at 285 nm (yellow), 311 nm (grey), 344 nm (orange), and 404 nm (blue) vs. pH.

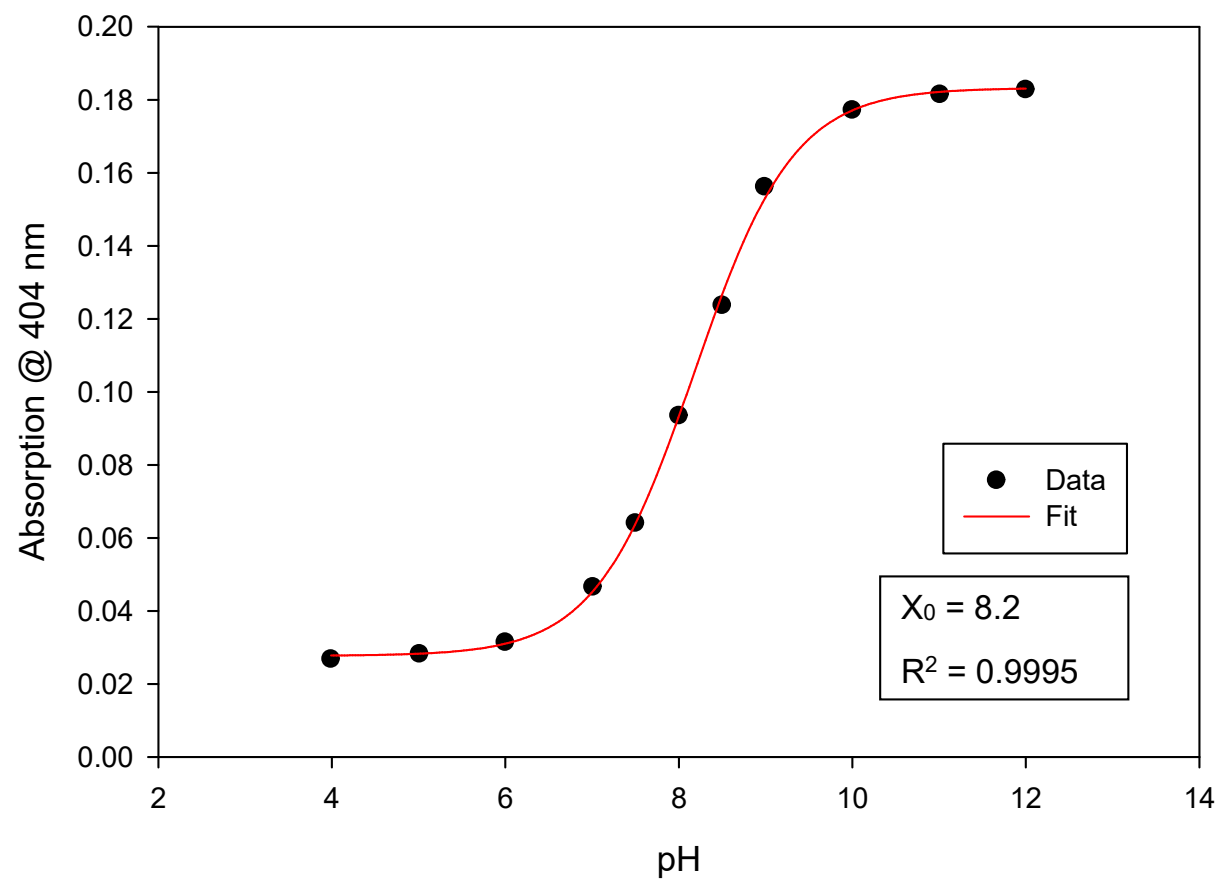

**Figure S89.** Four parameter sigmoid curve fit with the point of inflexion ( $X_0$ ) corresponding to the  $pK_a$  value for **8**.

**<sup>1</sup>H NMR Anion Binding Screen:**

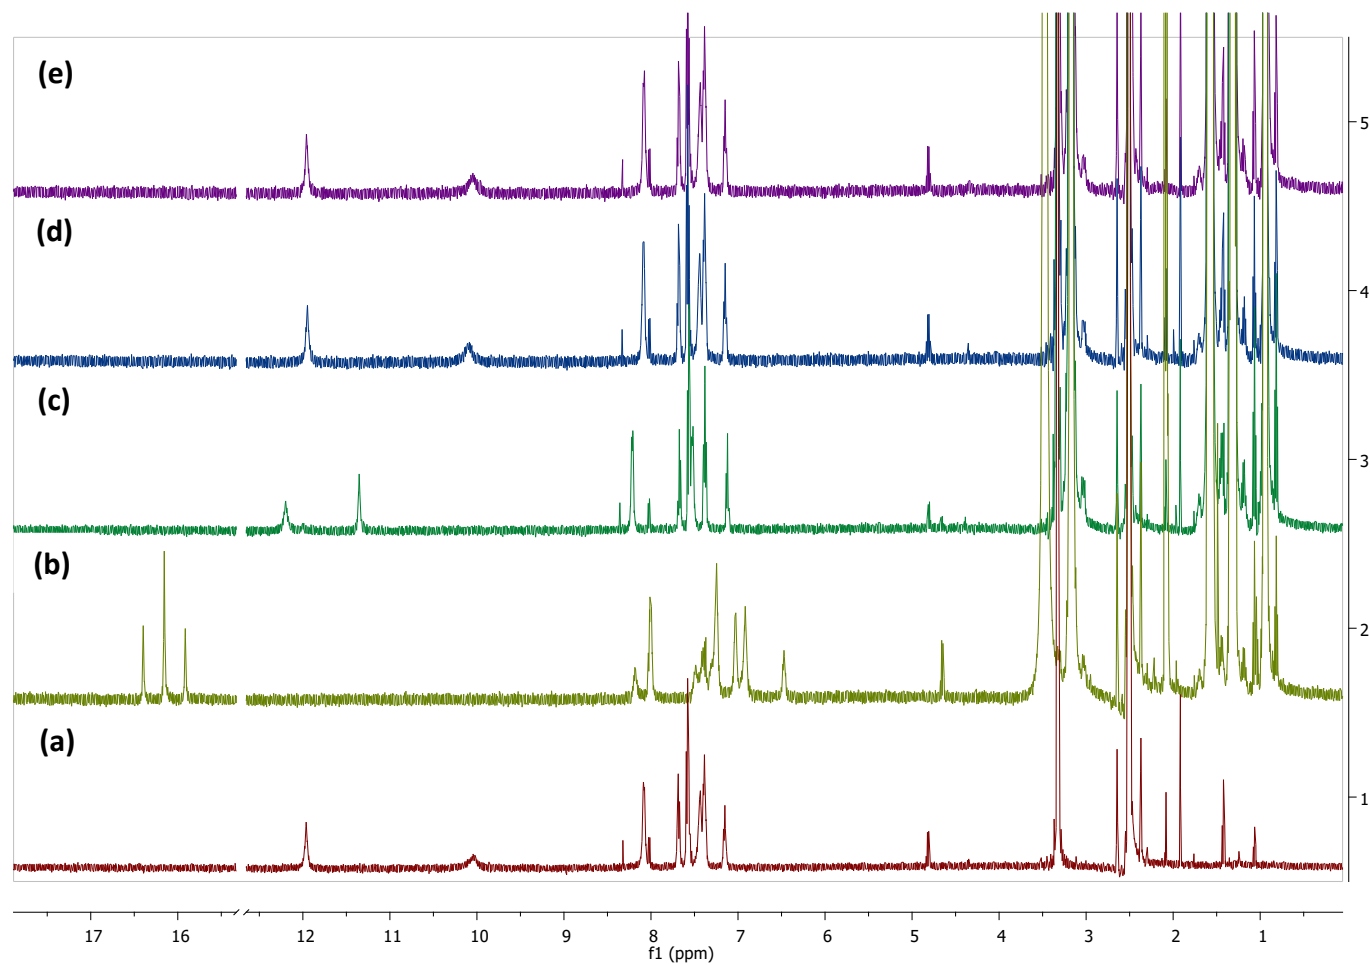

**Figure S90.** <sup>1</sup>H NMR stackplot of **1** (2.5 × 10<sup>-6</sup> M) treated with different TBA salts of anions (10 equiv.). a) Blank spectra of **1** (no anion present). b) **1** + TBAF. c) **1** + TBACl. d) **1** + TBABr. e) **1** + TBAI.

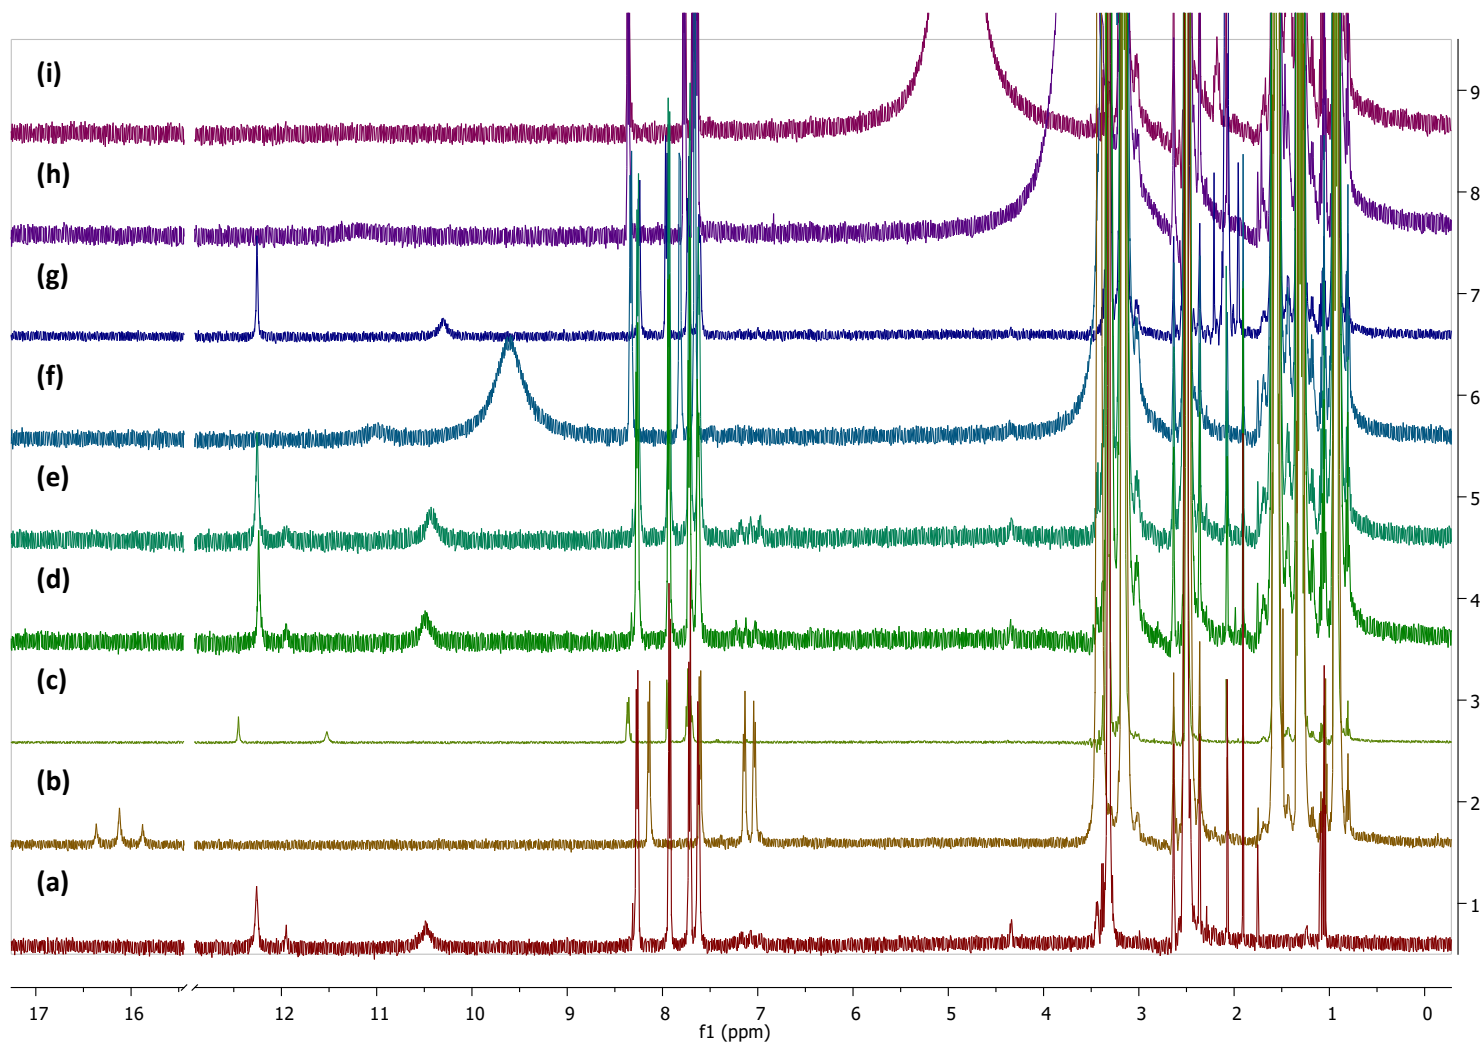

**Figure S91.**  $^1\text{H}$  NMR stackplot of **2** ( $2.5 \times 10^{-6}$  M) treated with different TBA salts of anions (10 equiv.). a) Blank spectra of **2** (no anion present). b) **2** + TBAF. c) **2** + TBACl. d) **2** + TBABr. e) **2** + TBAI, f) **2** +  $\text{TBA}_2\text{SO}_4$ , g) **2** +  $\text{TBANO}_3$ , h) **2** + TBAOAc, i) **2** +  $\text{TBA}_2\text{H}_2\text{PO}_4$ .

**<sup>1</sup>H NMR Anion Binding and Fitting Data:**

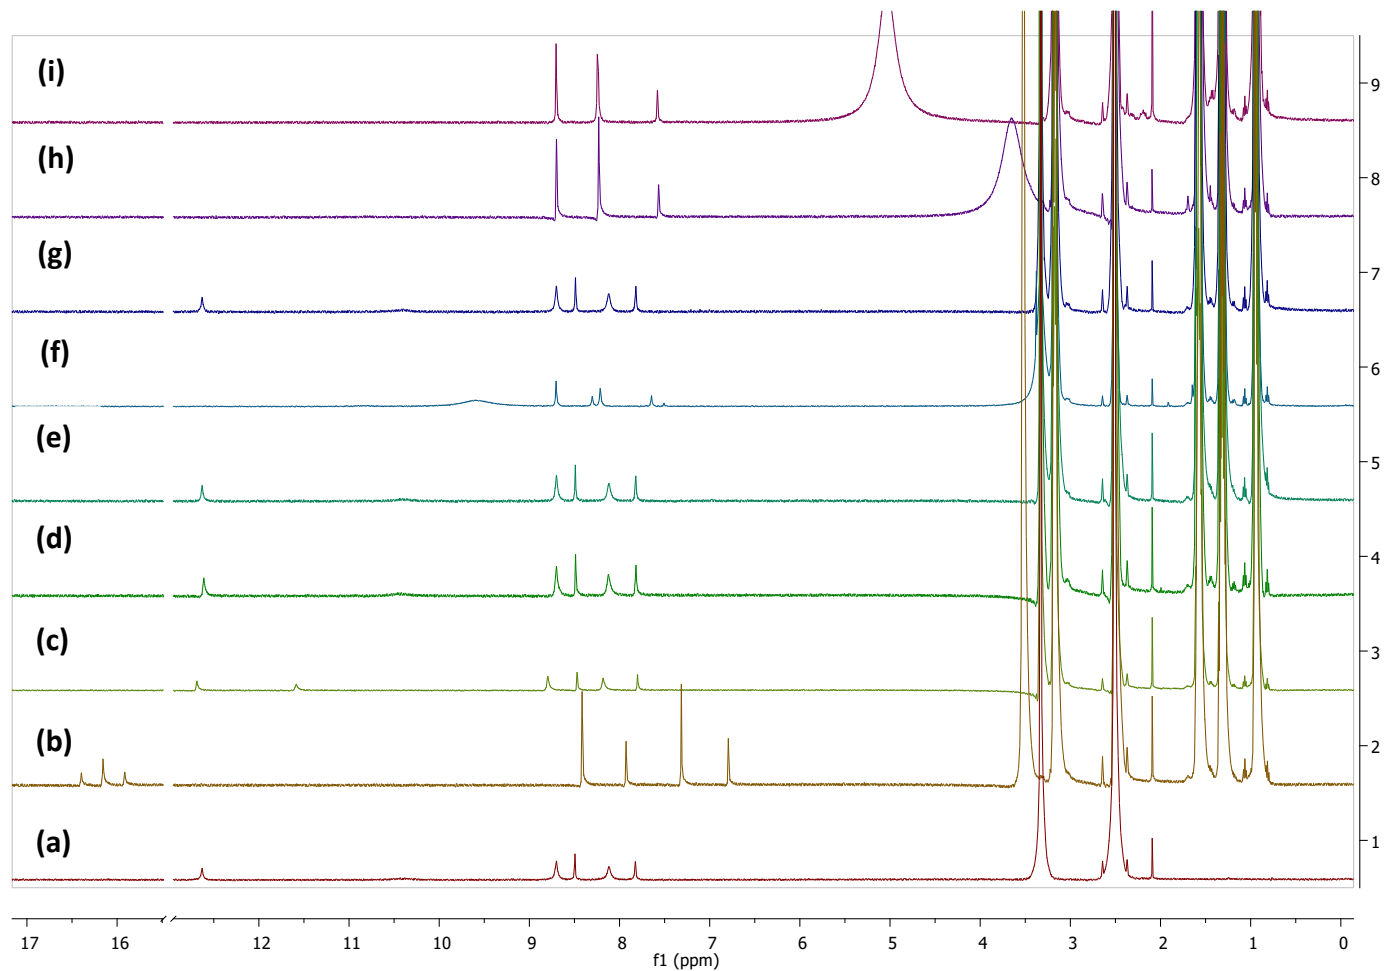

**Figure S92.** <sup>1</sup>H NMR stackplot of **3** ( $2.5 \times 10^{-6}$  M) treated with different TBA salts of anions (10 equiv.). a) Blank spectra of **3** (no anion present). b) **3** + TBAF. c) **3** + TBACl. d) **3** + TBABr. e) **3** + TBAI, f) **3** + TBA<sub>2</sub>SO<sub>4</sub>, g) **3** + TBANO<sub>3</sub>, h) **3** + TBAOAc, i) **3** + TBA<sub>2</sub>H<sub>2</sub>PO<sub>4</sub>.



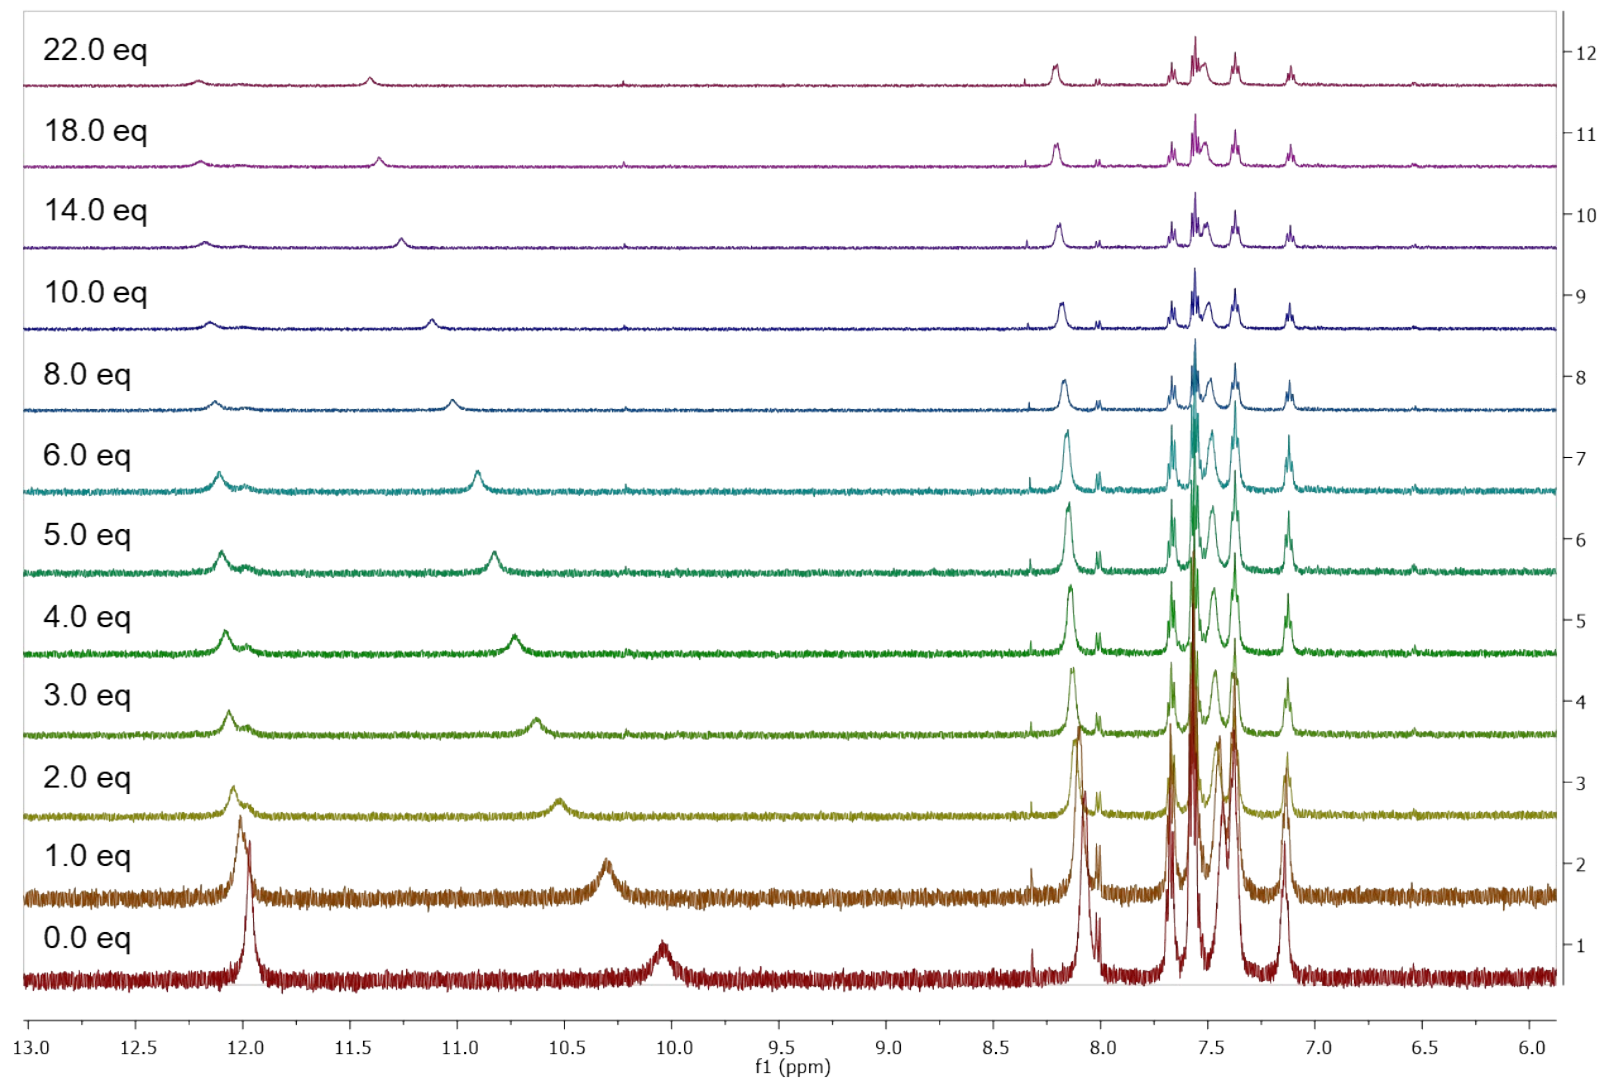

**Figure S93.** <sup>1</sup>H NMR stackplot, 6.0 ppm – 13.0 ppm, of receptor **1** with 0.0 – 22.0 equiv. TBACl in DMSO-d<sub>6</sub>/0.5% H<sub>2</sub>O.

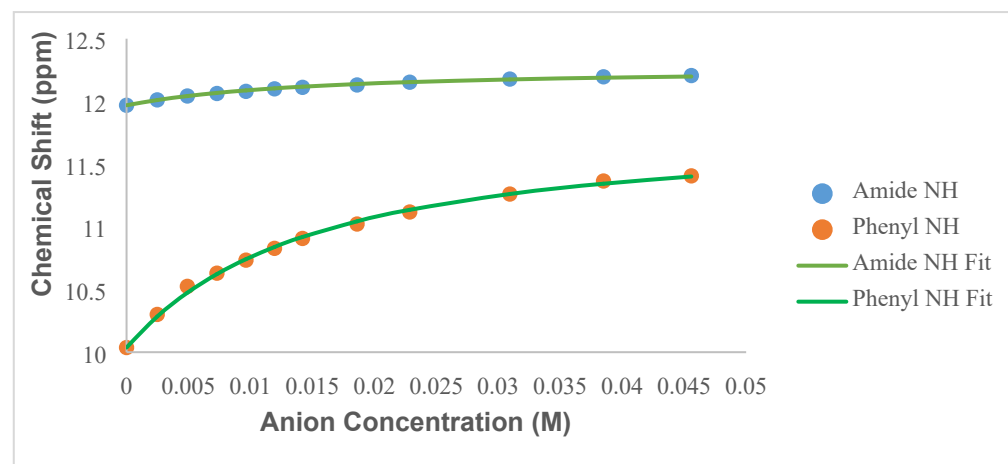

**Figure S94.** Fitted binding isotherm for the titration of **1** ( $2.5 \times 10^{-6}$  M) in the presence of increasing concentrations of  $\text{Cl}^-$  in  $\text{DMSO-d}_6/0.5\% \text{H}_2\text{O}$ . The data is fitted to a 1:1 binding model and shows the chemical shift of the NH signals throughout the titration.  $K_a = 76 \text{ M}^{-1}$ , Error = 2.63 %. <http://app.supramolecular.org/bindfit/view/6d463652-057f-4ea4-b397-8bb063aa3489>

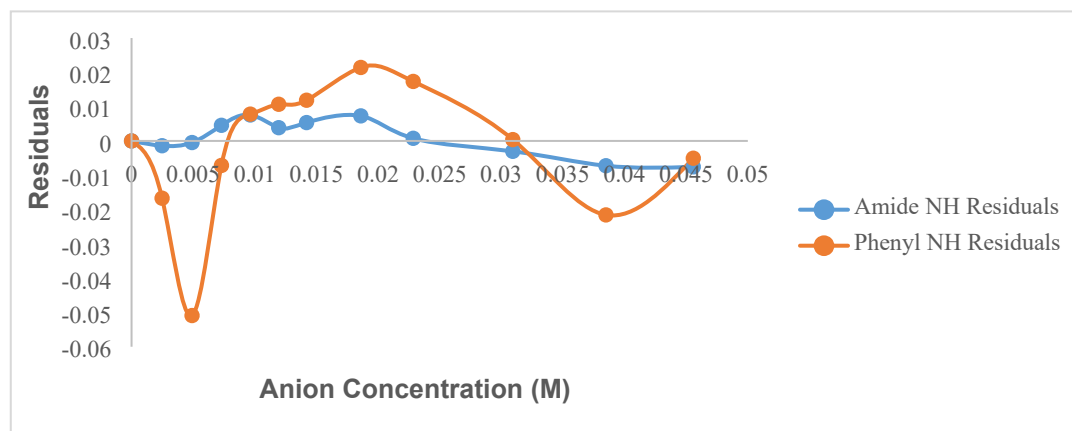

**Figure S95.** Residual plot of **1**.

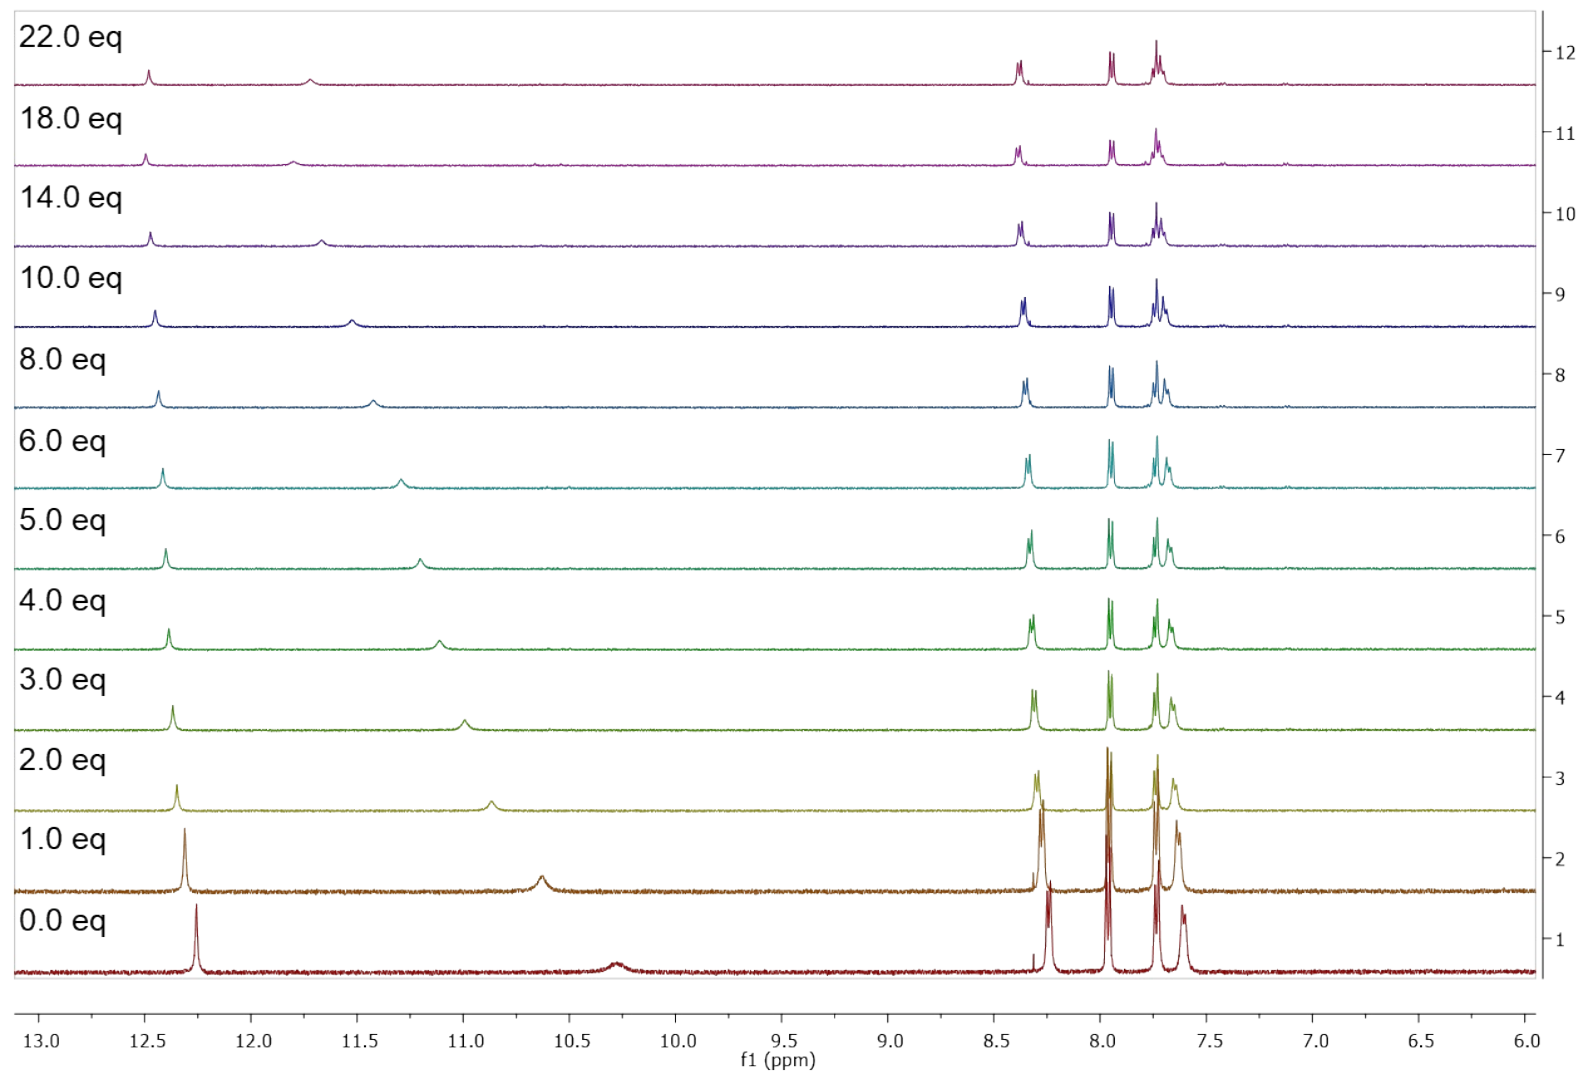

**Figure S96.** <sup>1</sup>H NMR stackplot, 6.0 ppm – 13.0 ppm, of receptor **2** with 0.0 – 22.0 equiv. TBACl in DMSO-d<sub>6</sub>/0.5% H<sub>2</sub>O.

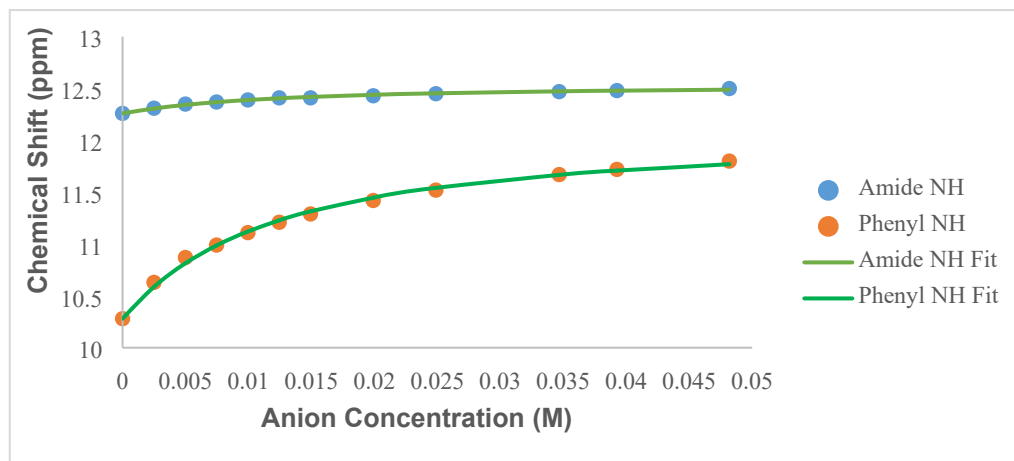

**Figure S97.** Fitted binding isotherm for the titration of **2** ( $2.5 \times 10^{-6} \text{ M}$ ) in the presence of increasing concentrations of  $\text{Cl}^-$  in  $\text{DMSO-}d_6/0.5\% \text{ H}_2\text{O}$ . The data is fitted to a 1:1 binding model and shows the chemical shift of the NH signals throughout the titration.  $K_a = 97 \text{ M}^{-1}$ , Error = 3.58 %.

<http://app.supramolecular.org/bindfit/view/b9c881e2-2f89-47fd-bf93-a6d2d3a9006d>

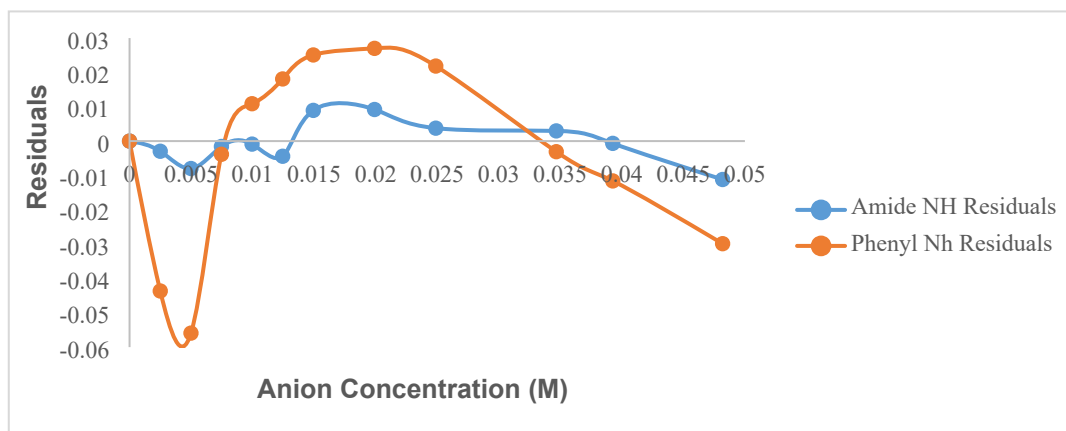

**Figure S98.** Residual plot of **2**

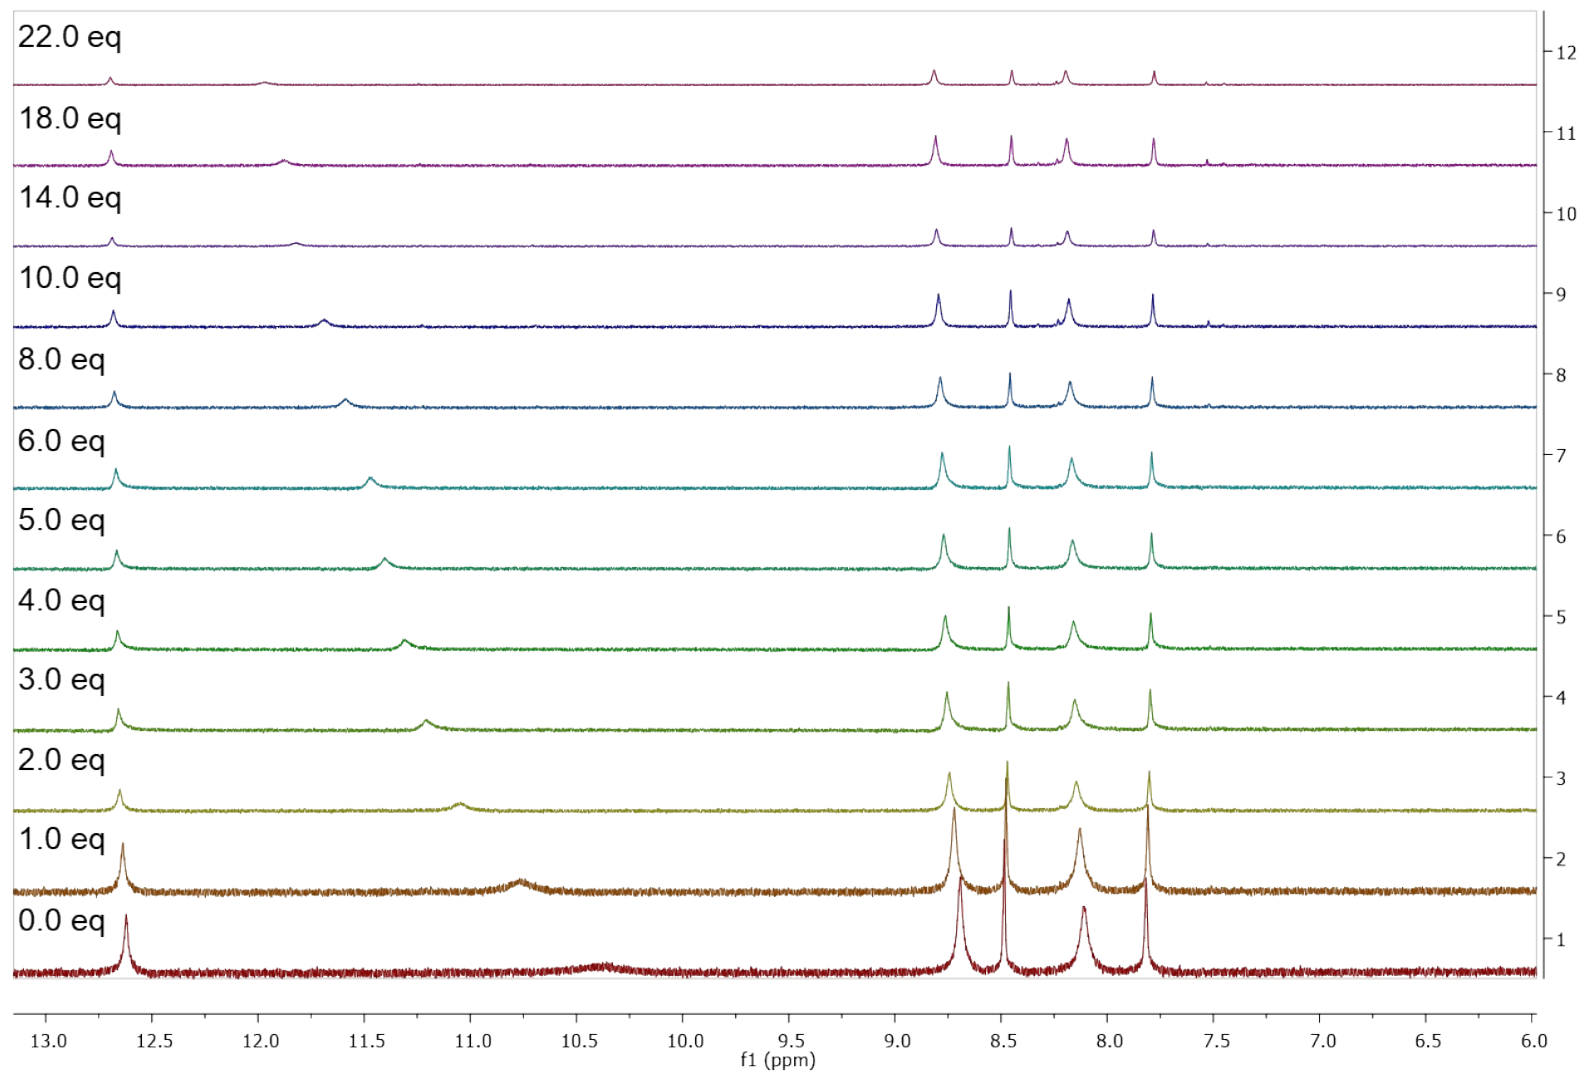

**Figure S99.** <sup>1</sup>H NMR stackplot, 6.0 ppm – 13.0 ppm, of receptor **3** with 0.0 – 22.0 equiv. TBACl in DMSO-d<sub>6</sub>/0.5% H<sub>2</sub>O.

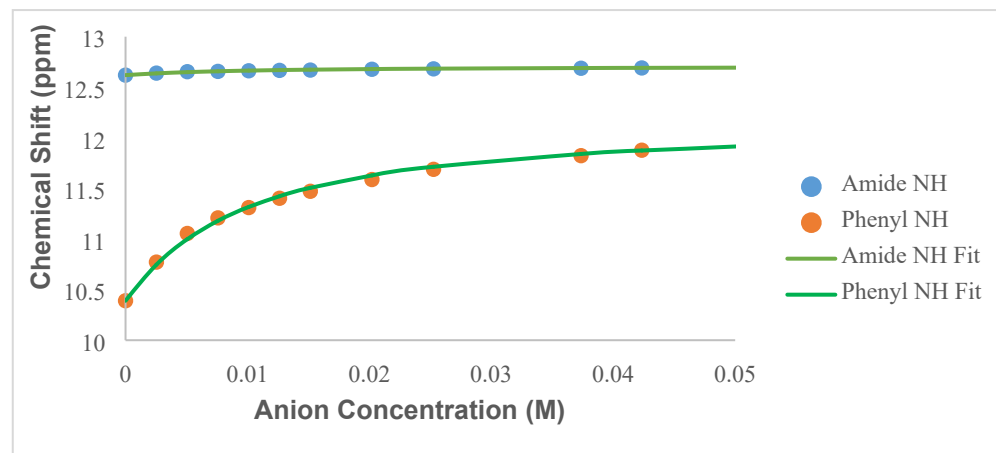

**Figure S100.** Fitted binding isotherm for the titration of **3** ( $2.5 \times 10^{-6} \text{ M}$ ) in the presence of increasing concentrations of  $\text{Cl}^-$  in  $\text{DMSO-d}_6/0.5\% \text{ H}_2\text{O}$ ). The data is fitted to a 1:1 binding model and shows the chemical shift of the NH signals throughout the titration.  $K_a = 123 \text{ M}^{-1}$ , Error = 4.78 %. <http://app.supramolecular.org/bindfit/view/7ab90122-e3d8-4bfe-9e82-db25ca1e360d>

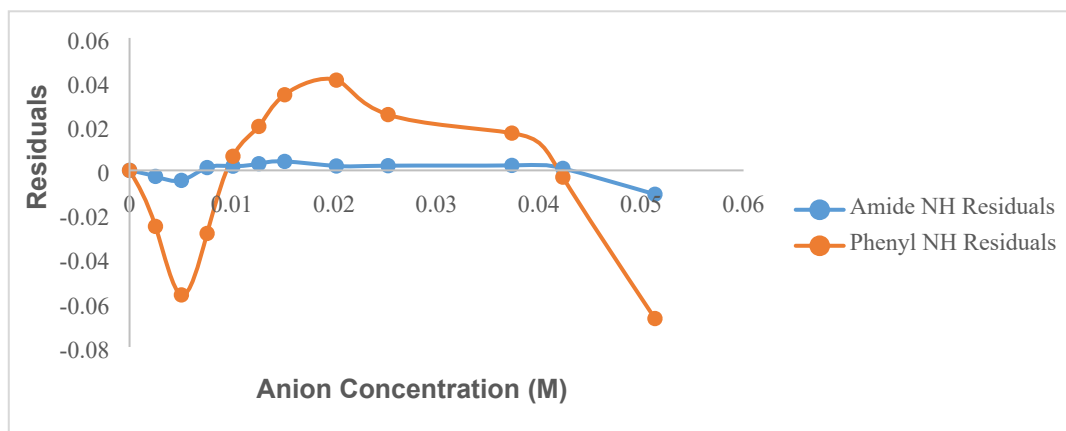

**Figure S101.** Residual plot of **3**.

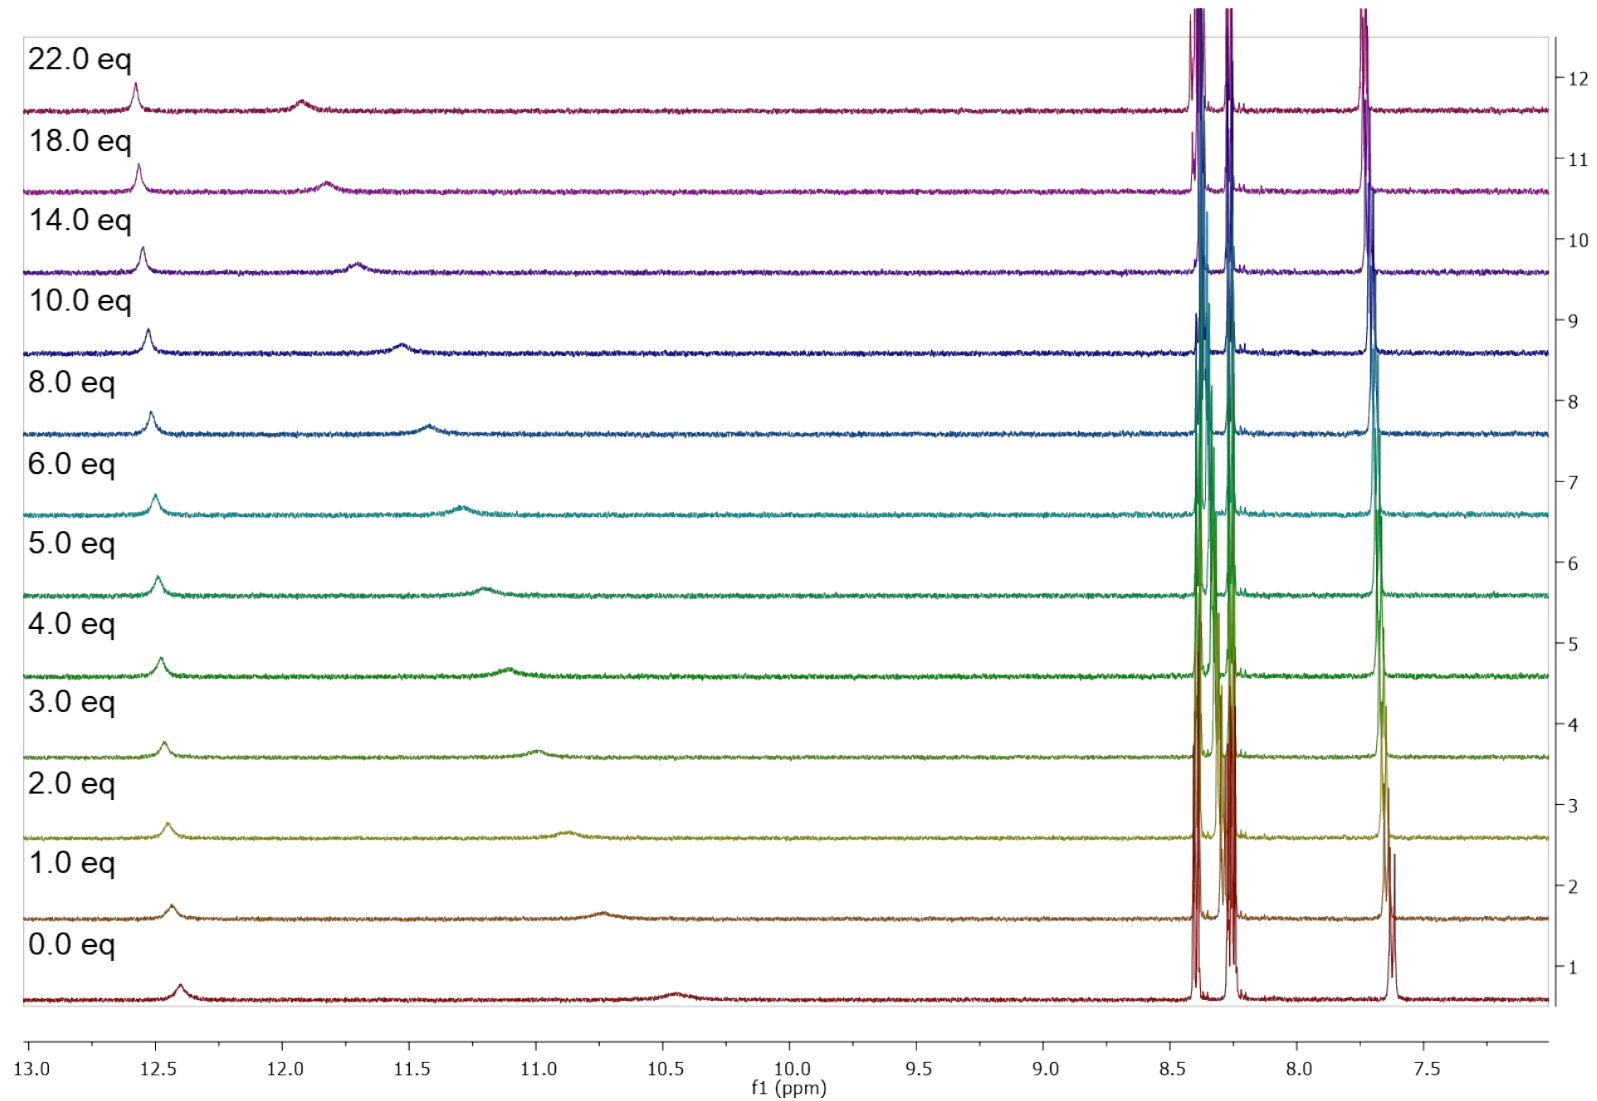

**Figure S102.** <sup>1</sup>H NMR stackplot, 6.0 ppm – 13.0 ppm, of receptor **4** with 0.0 – 22.0 equiv. TBACl in DMSO-*d*<sub>6</sub>/0.5% H<sub>2</sub>O.

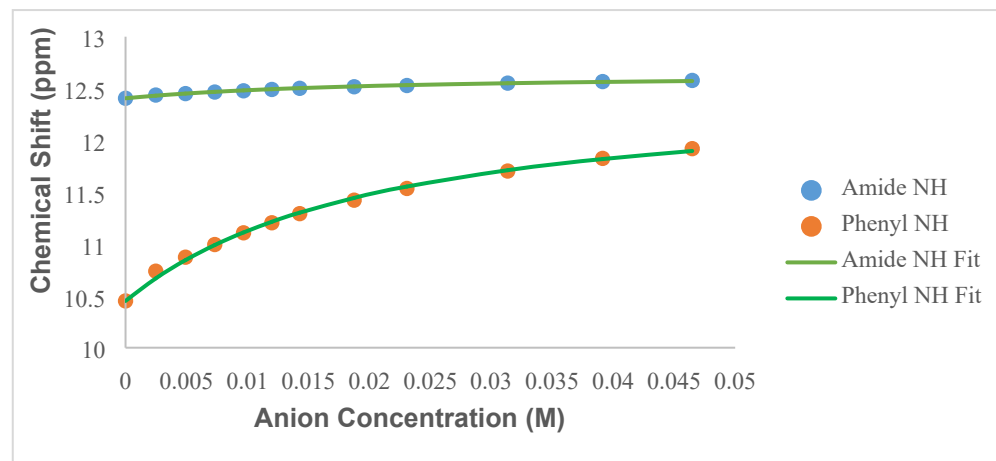

**Figure S103.** Fitted binding isotherm for the titration of **4** ( $2.5 \times 10^{-6} \text{ M}$ ) in the presence of increasing concentrations of  $\text{Cl}^-$  in  $\text{DMSO-}d_6/0.5\% \text{ H}_2\text{O}$ . The data is fitted to a 1:1 binding model and shows the chemical shift of the NH signals throughout the titration.  $K_a = 54 \text{ M}^{-1}$ , Error = 2.85 %. <http://app.supramolecular.org/bindfit/view/6b4ba0e4-dbef-48ed-9366-bac9f2b33226>

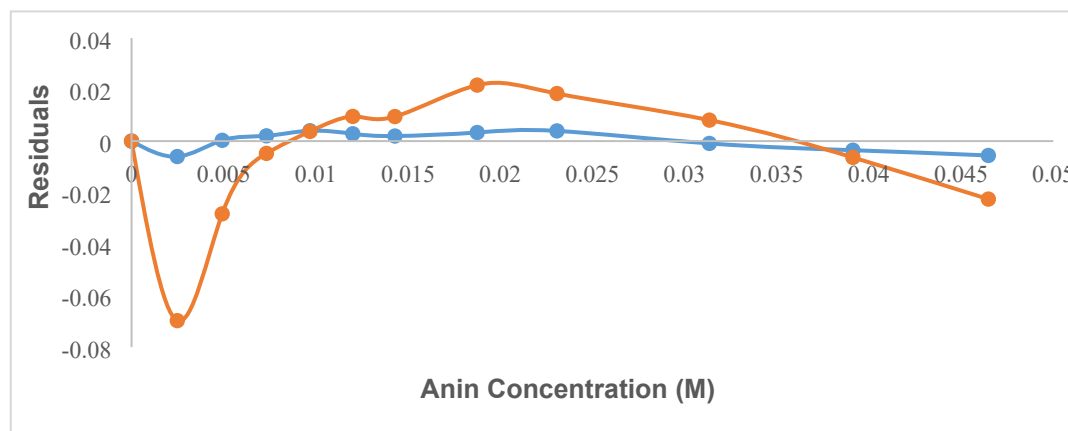

**Figure S104.** Residual plot of **4**.



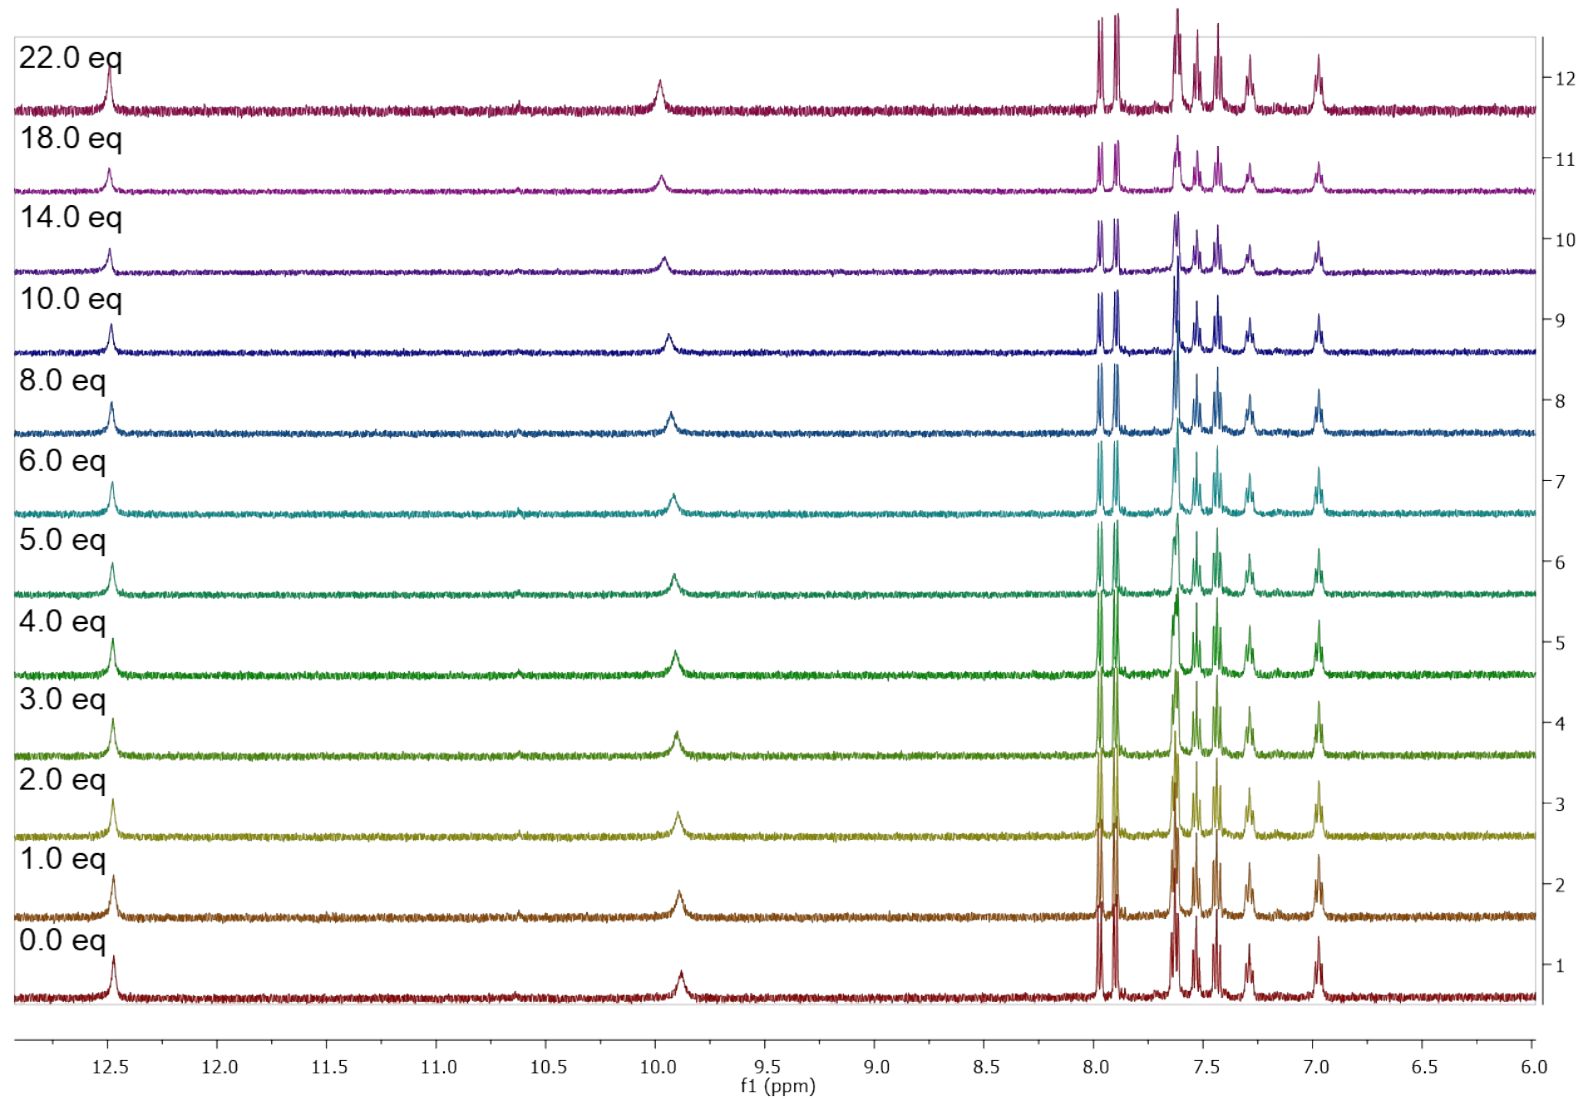

**Figure S105.** <sup>1</sup>H NMR stackplot, 6.0 ppm – 13.0 ppm, of receptor **5** with 0.0 – 22.0 equiv. TBACl in DMSO-*d*<sub>6</sub>/0.5% H<sub>2</sub>O.

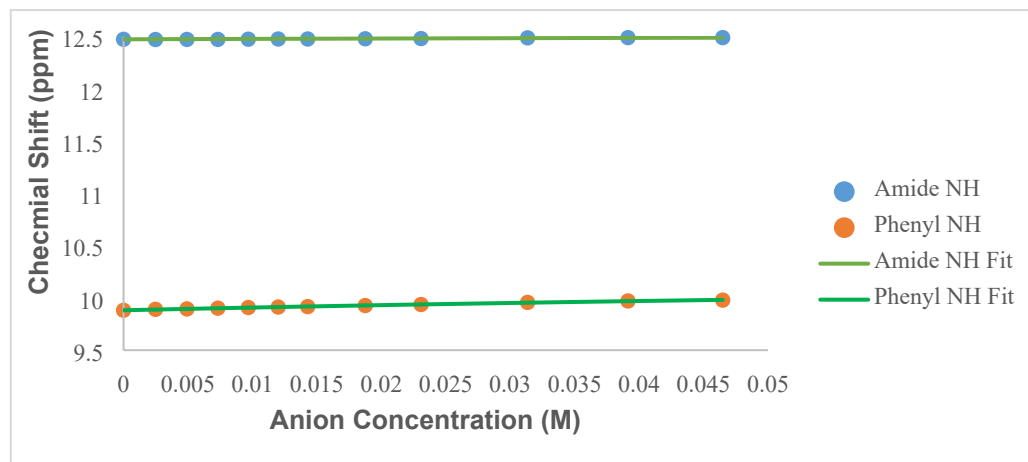

**Figure S106.** Fitted binding isotherm for the titration of **5** ( $2.5 \times 10^{-6}$  M) in the presence of increasing concentrations of  $\text{Cl}^-$  in  $\text{DMSO-}d_6/0.5\%$   $\text{H}_2\text{O}$ ). The data is fitted to a 1:1 binding model and shows the chemical shift of the NH signals throughout the titration.  $K_a = 6$ , Error = 3.19 %.

<http://app.supramolecular.org/bindfit/view/808f07cd-6477-471e-b172-c6dab49a4405>

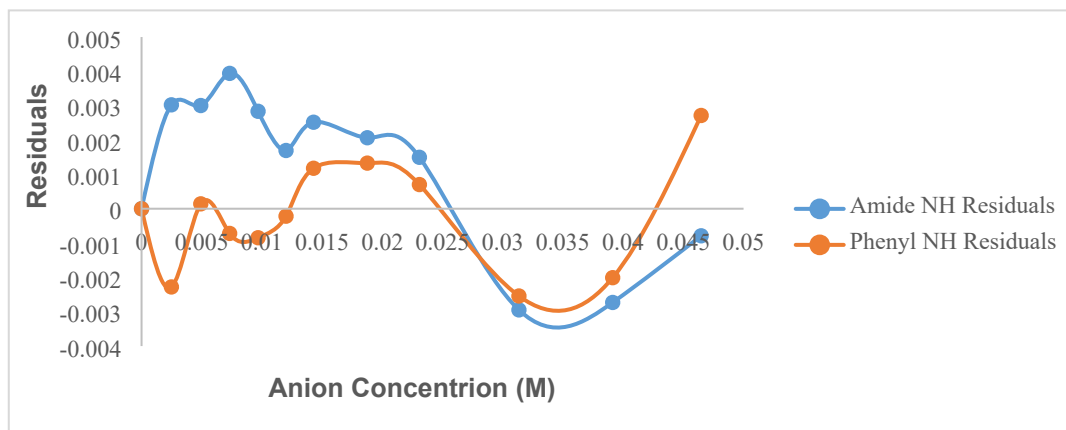

**Figure S107.** Residual plot of **5**.

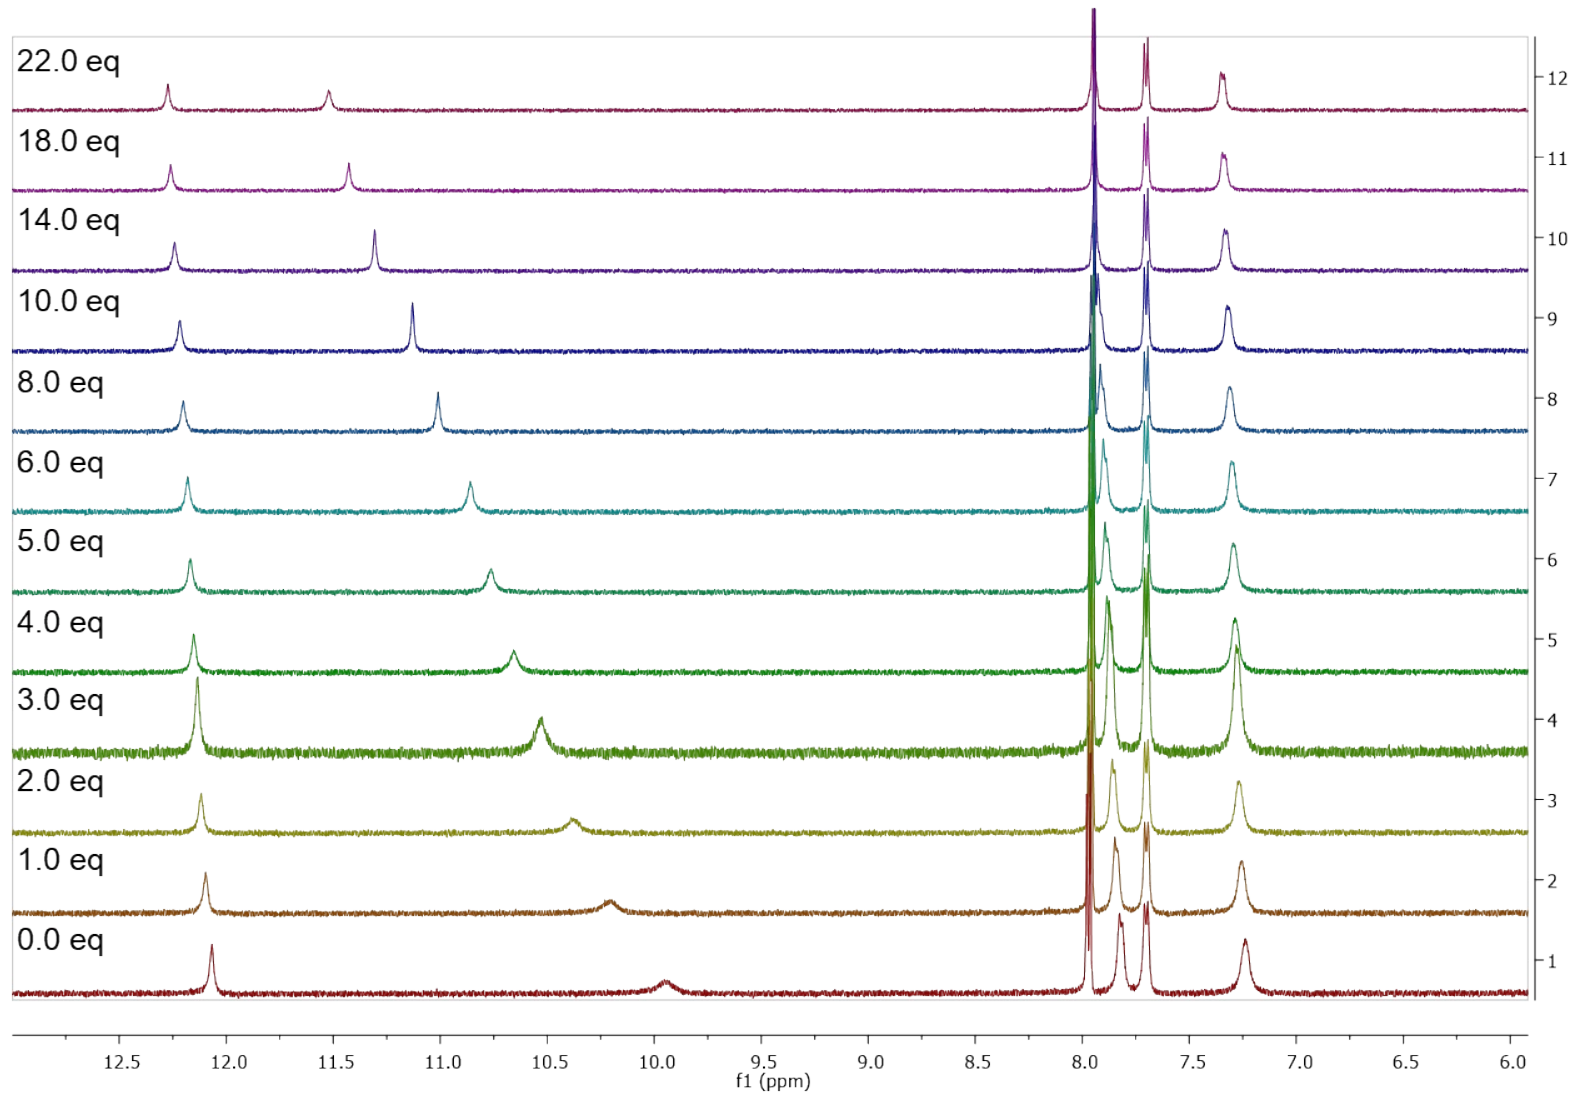

**Figure S108.** <sup>1</sup>H NMR stackplot, 6.0 ppm – 13.0 ppm, of receptor **6** with 0.0 – 22.0 equiv. TBACl in DMSO-*d*<sub>6</sub>/0.5% H<sub>2</sub>O.

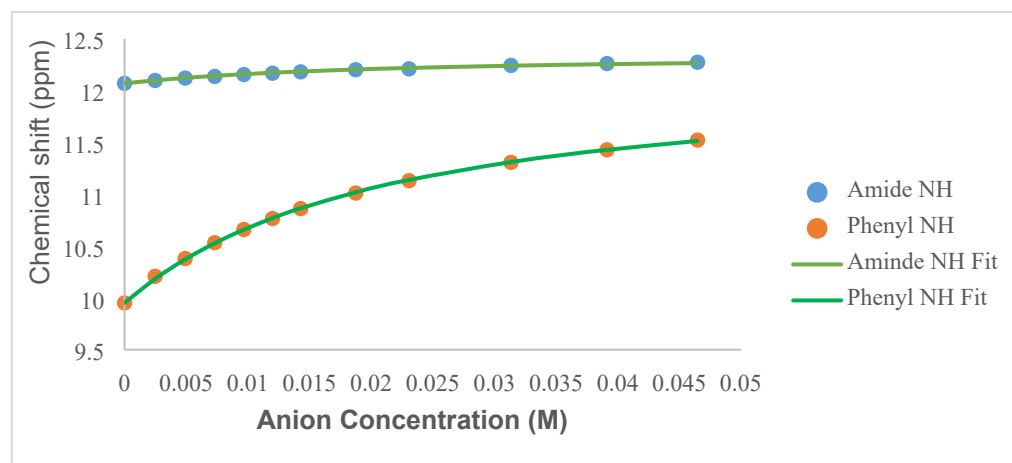

**Figure S109.** Fitted binding isotherm for the titration of **6** ( $2.5 \times 10^{-6} \text{ M}$ ) in the presence of increasing concentrations of  $\text{Cl}^-$  in  $\text{DMSO-}d_6/0.5\% \text{ H}_2\text{O}$ . The data is fitted to a 1:1 binding model and shows the chemical shift of the NH signals throughout the titration.  $K_D = 52 \text{ M}^{-1}$ , Error = 1.85 %. <http://app.supramolecular.org/bindfit/view/6f078276-c677-4a18-8a3d-1b13a398beff>

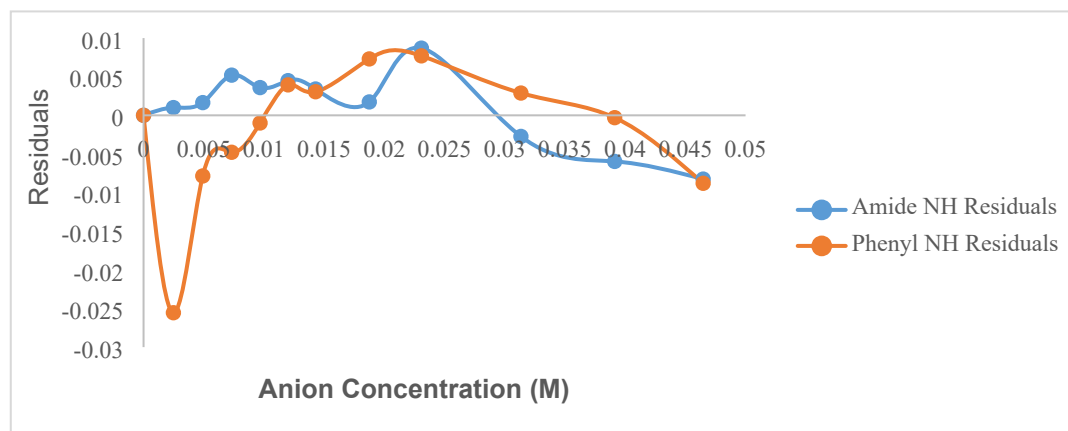

**Figure S110.** Residual plot of **6**.

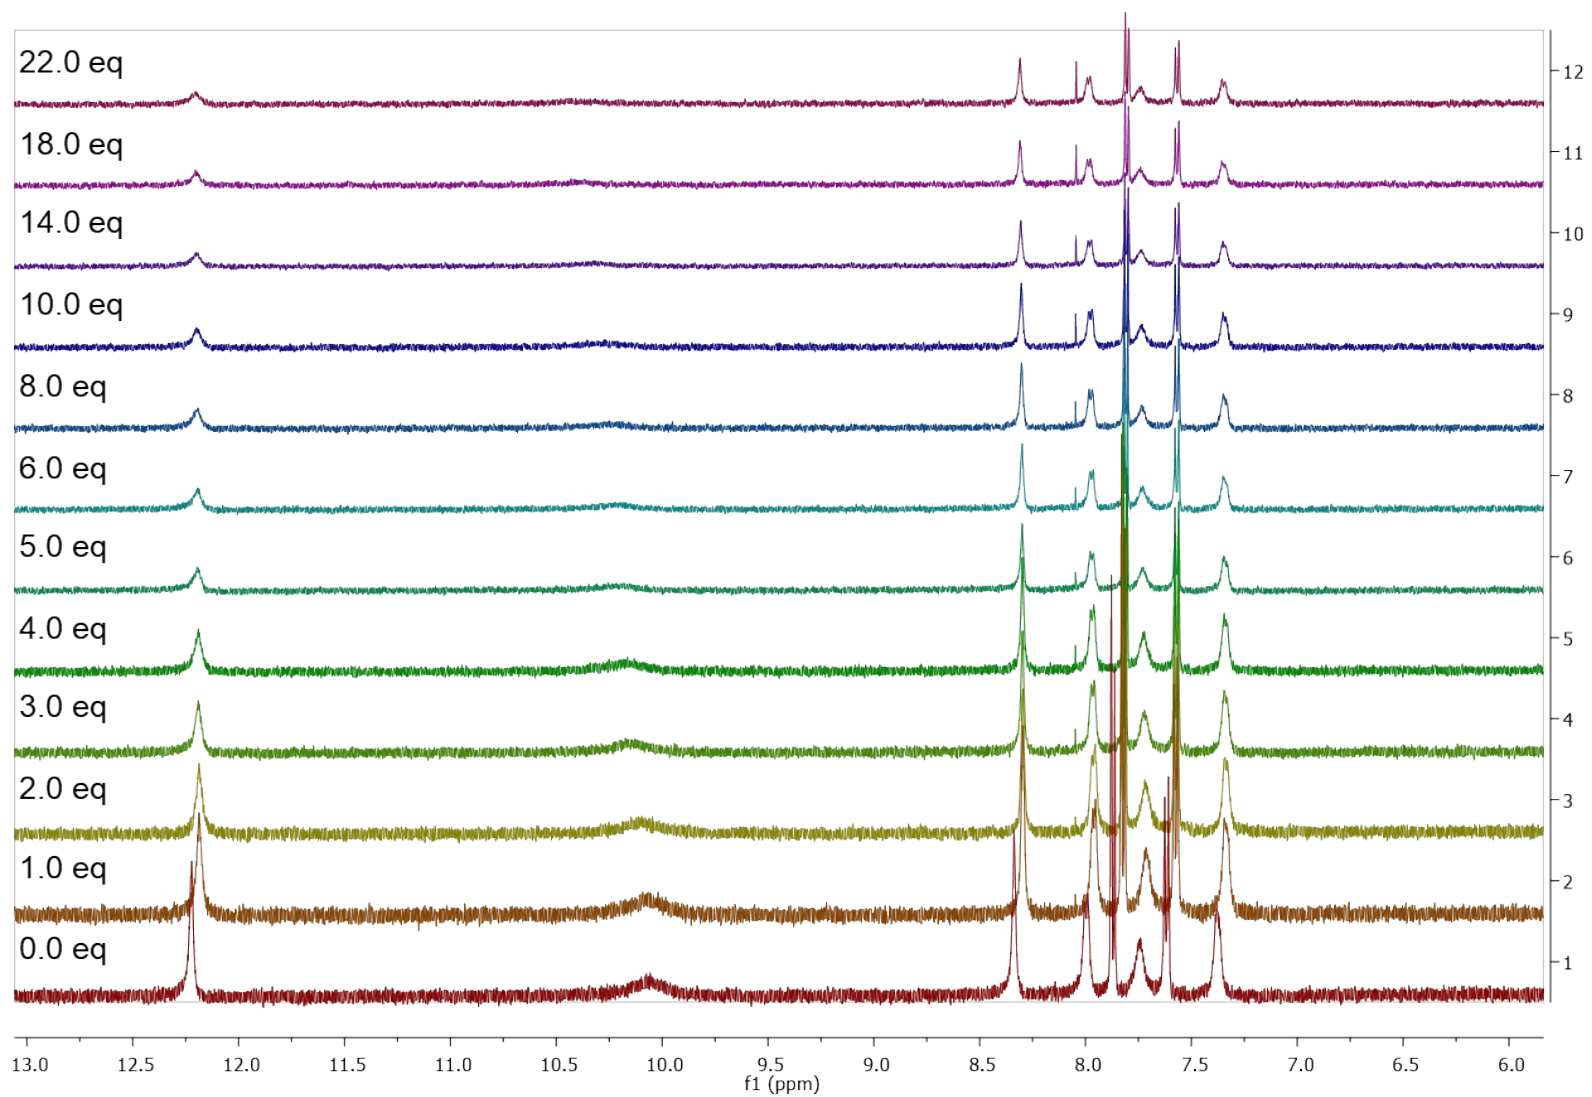

**Figure S111.** <sup>1</sup>H NMR stackplot, 6.0 ppm – 13.0 ppm, of receptor **7** with 0.0 – 22.0 equiv. TBACl in DMSO-d<sub>6</sub>/0.5% H<sub>2</sub>O.

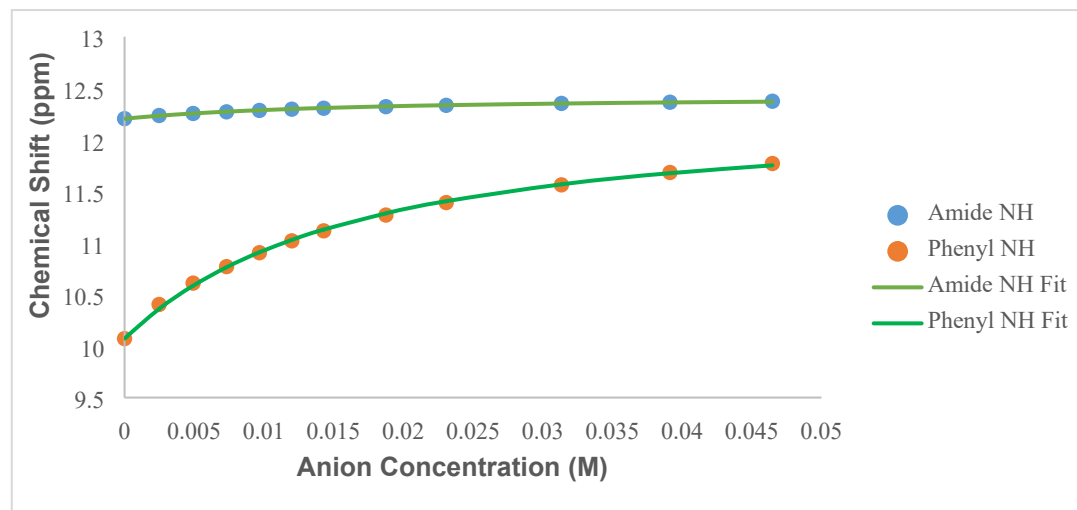

**Figure S112.** Fitted binding isotherm for the titration of **7** ( $2.5 \times 10^{-6}$  M) in the presence of increasing concentrations of  $\text{Cl}^-$  in  $\text{DMSO-}d_6/0.5\%$   $\text{H}_2\text{O}$ ). The data is fitted to a 1:1 binding model and shows the chemical shift of the NH signals throughout the titration.  $K_a = 69 \text{ M}^{-1}$ , Error = 1.06 %. <http://app.supramolecular.org/bindfit/view/b58c6396-d702-49ec-aa8e-9772fcc0b312>

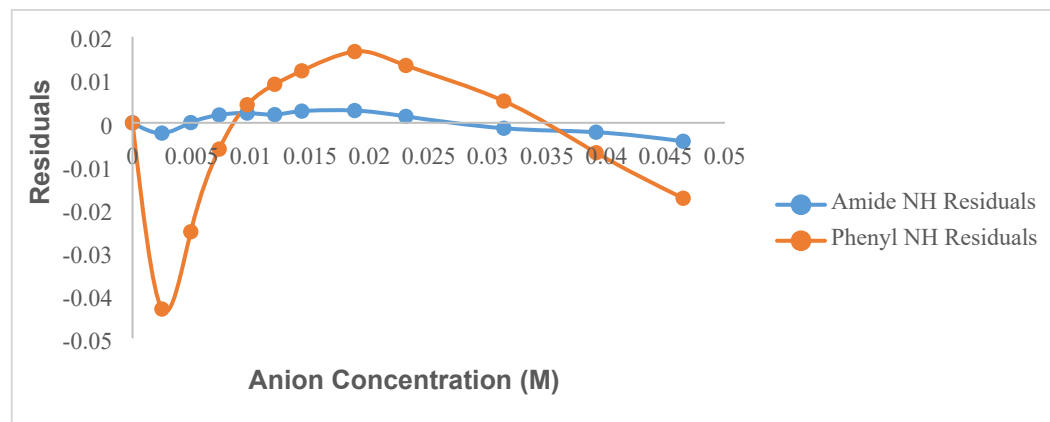

**Figure S113.** Residual plot of **7**.

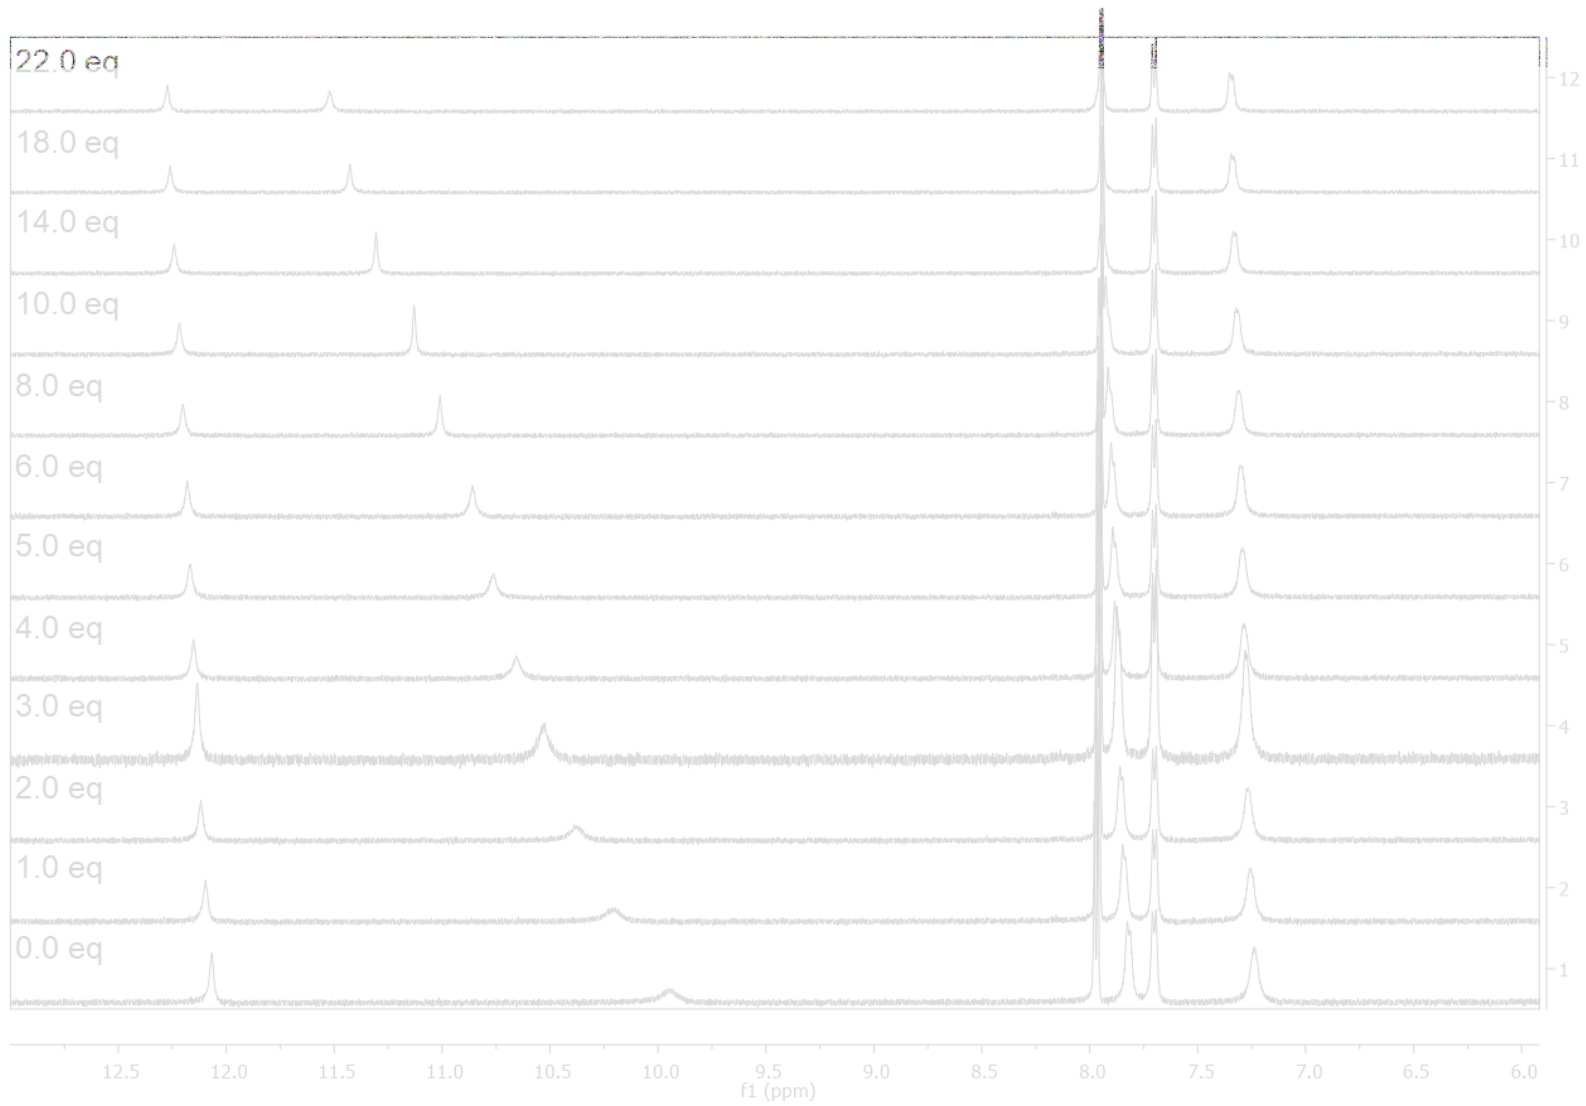

**Figure S114.** <sup>1</sup>H NMR stackplot, 6.0 ppm – 13.0 ppm, of receptor **8** with 0.0 – 22.0 equiv. TBACl in DMSO-d<sub>6</sub>/0.5% H<sub>2</sub>O.

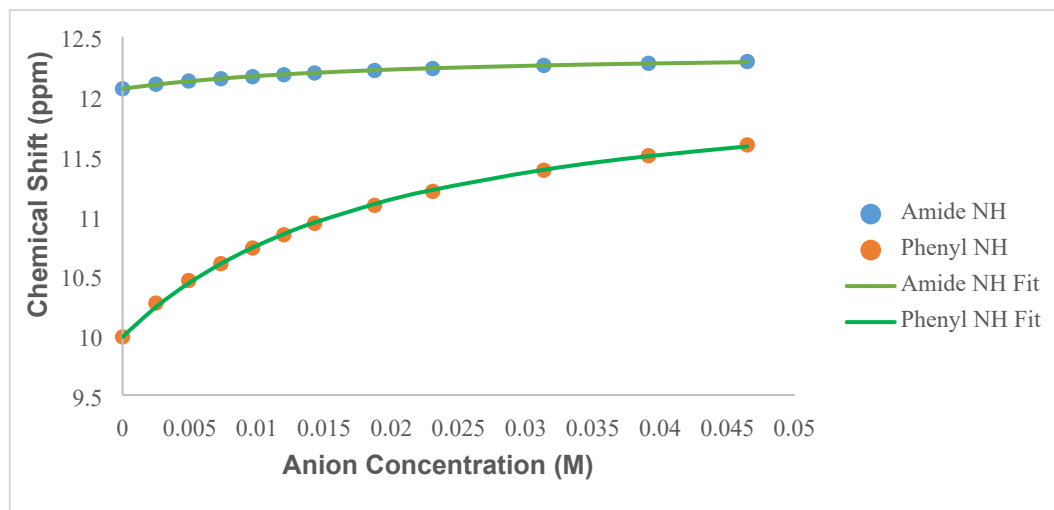

**Figure S115.** Fitted binding isotherm for the titration of **8** ( $2.5 \times 10^{-6}$  M) in the presence of increasing concentrations of Cl<sup>-</sup> in DMSO-*d*<sub>6</sub>/0.5% H<sub>2</sub>O). The data is fitted to a 1:1 binding model and shows the chemical shift of the NH signals throughout the titration.  $K_a = 58 \text{ M}^{-1}$ , Error = 1.47 %. <http://app.supramolecular.org/bindfit/view/400a20c4-bf6c-4161-aa3d-d9e742573a34>

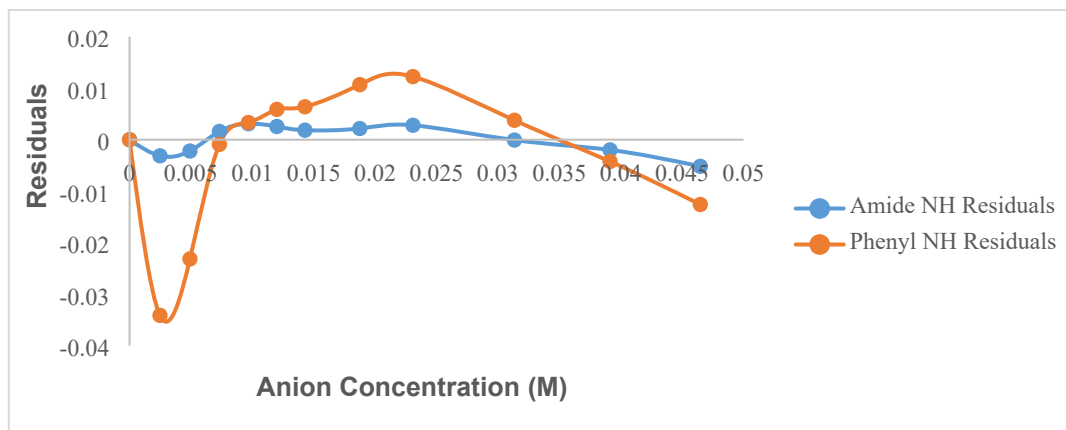

**Figure S116.** Residual plot of **8**.



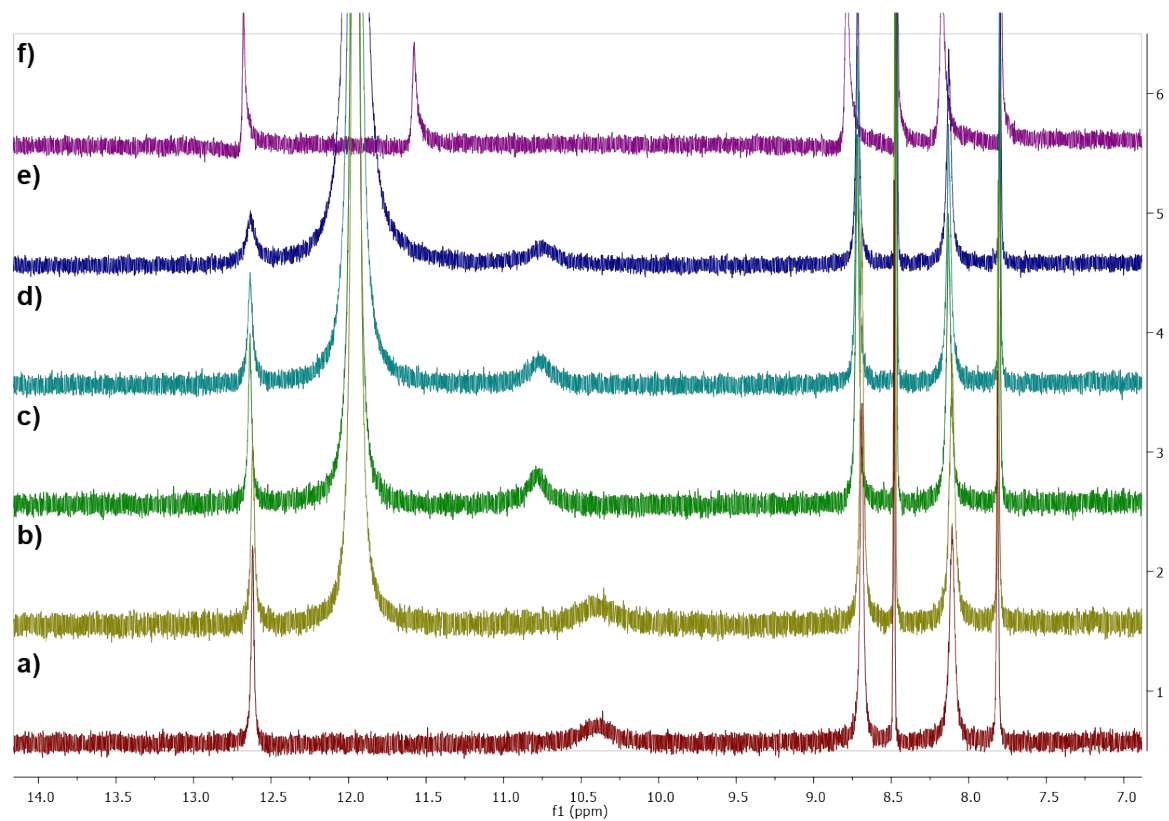

**Figure S117.** <sup>1</sup>H NMR stackplot of **3** ( $2.5 \times 10^{-6}$  M) and TBACl (10 equiv.), treated with increasing additions of AcOH. a) **3** (no AcOH or TBACl). b) **3** + 10 equiv. AcOH. c) **3** + 10 equiv. AcOH + TBACl. d) **3** + 20 equiv. AcOH + 10 equiv. TBACl. e) **3** + 100 equiv. AcOH + 10 equiv. TBACl. f) **3** + 10 equiv. TBACl.

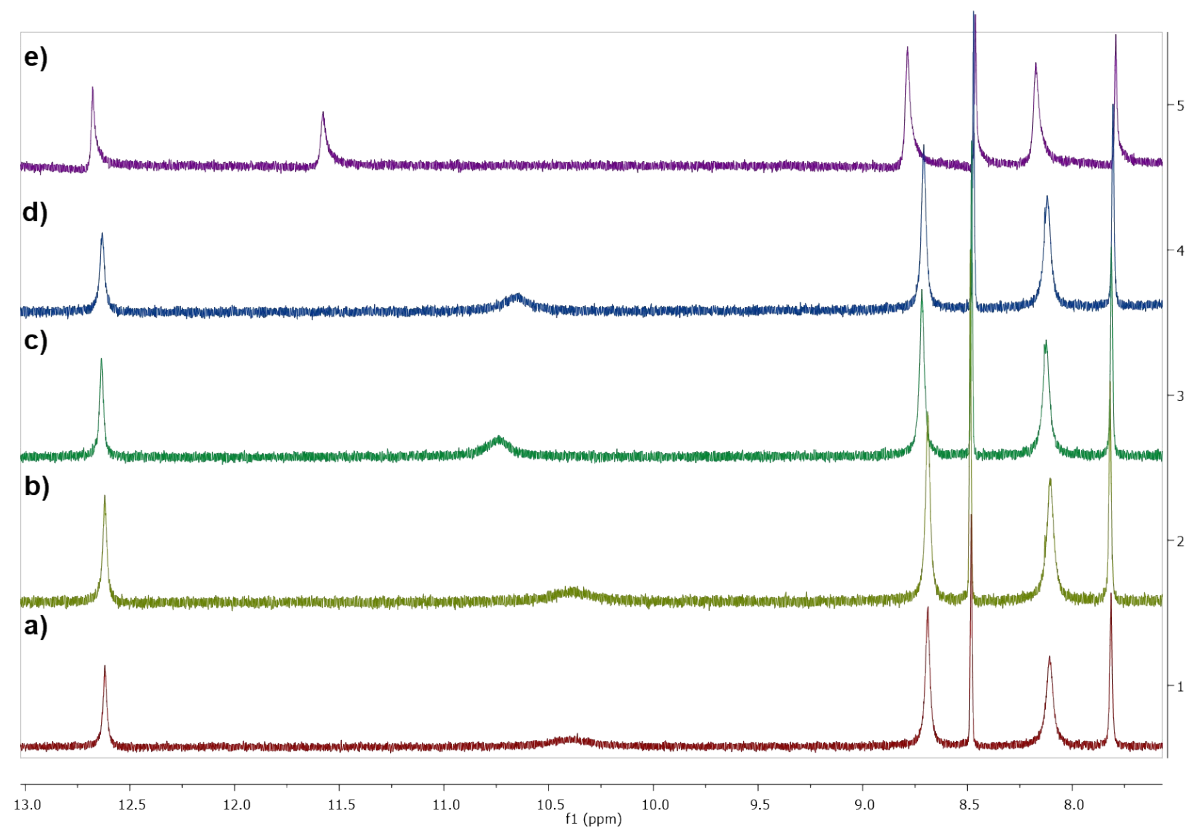

**Figure S118.** <sup>1</sup>H NMR stackplot of **3** ( $2.5 \times 10^{-6}$  M) and TBACl (10 equiv.), treated with increasing additions of TFA. a) **3** (no AcOH or TBACl). b) **3** + 10 equiv. TFA. c) **3** + 10 equiv. TFA + TBACl. d) **3** + 20 equiv. TFA + 10 equiv. TBACl. e) **3** + 100 equiv TFA + 10 equiv. TBACl. f) **3** + 10 equiv. TBACl.

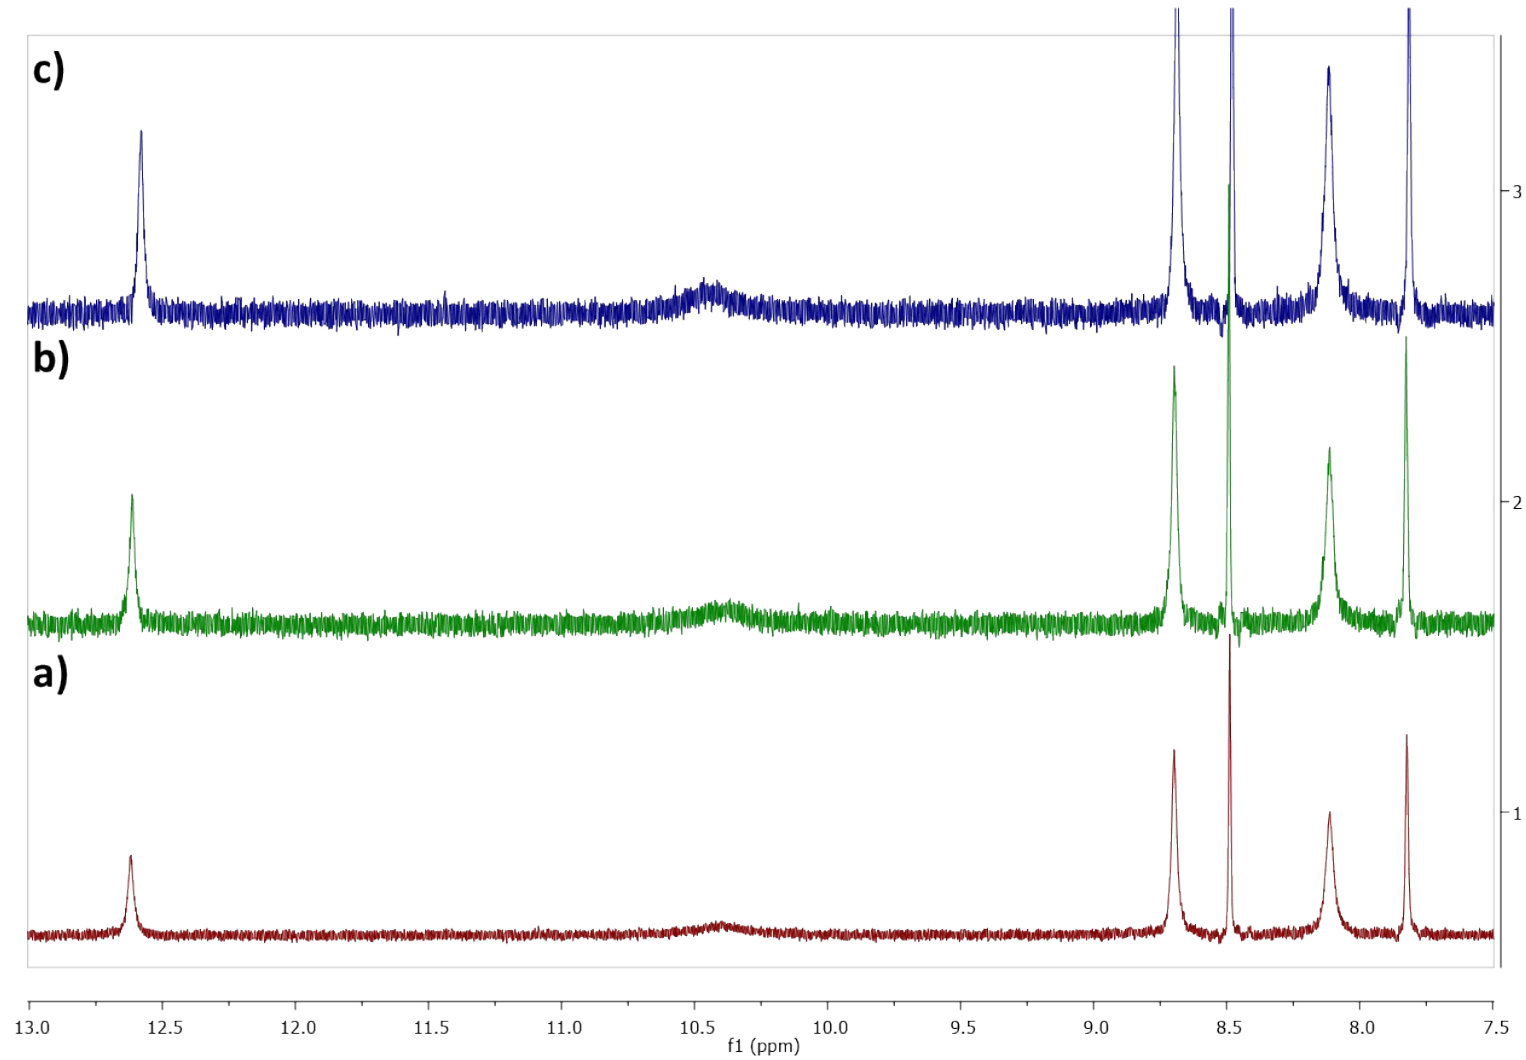

**Figure S119.** <sup>1</sup>H NMR stackplot of **3** ( $2.5 \times 10^{-6}$  M) treated with increasing additions of CSA. a) **3** (no CSA). b) **3** + 10 equiv. CSA. c) **3** + 100 equiv. CSA.

### Geometry Optimisations:

34  
SCF Energy = -989.818171042  
Enthalpy 0K = -989.557856  
Enthalpy 298K = -989.538977  
Free Energy 298K = -989.606784  
Lowest Frequencies = 22.0973 cm<sup>-1</sup>

#### ASQ1\_a

C 5.48112 -1.98683 0.12866  
C 4.34430 -2.79366 0.10147  
C 3.07856 -2.22042 0.05940  
C 2.93895 -0.82746 0.04472  
C 4.07143 -0.01072 0.07323  
C 5.33261 -0.60121 0.11393  
N 1.62139 -0.32816 0.00629  
C 1.16539 0.92720 -0.04602  
C 1.74145 2.33746 -0.09652  
O 2.83291 2.83548 -0.10453  
C -0.12745 1.44505 -0.07851  
N -1.42786 1.00272 -0.06037  
C -3.31356 -0.53754 0.01364  
C -4.21075 0.40741 0.52310  
C -5.57334 0.12320 0.55823  
C -6.04371 -1.10017 0.08286  
C -5.14927 -2.04763 -0.41599  
C -3.78661 -1.77106 -0.44393  
C 0.29278 2.83828 -0.12715  
O -0.29213 3.89492 -0.17179  
H -2.12113 1.74012 -0.13370  
H 0.87373 -1.02278 -0.00461  
H 3.97649 1.06881 0.06067  
H 2.19254 -2.85036 0.03777  
H 4.43906 -3.87522 0.11253  
H 6.46987 -2.43291 0.16095  
H 6.20892 0.03962 0.13470  
H -3.86054 1.35184 0.93124  
H -6.26531 0.85425 0.96393  
H -7.10713 -1.31771 0.10815  
H -5.51449 -3.00237 -0.78100  
H -3.07242 -2.49723 -0.81862  
C -1.84061 -0.30909 -0.04952  
O -1.03854 -1.23226 -0.10406

34

SCF Energy = -989.812210970  
Enthalpy 0K = -989.552579  
Enthalpy 298K = -989.533866

Free Energy 298K = -989.598732  
Lowest Frequencies = 43.6932 cm<sup>-1</sup>

#### ASQ1\_b

C 3.00349 -1.73728 -1.36391  
C 1.83822 -1.41756 -2.05900  
C 0.61421 -1.36804 -1.39726  
C 0.56361 -1.61417 -0.02246  
C 1.72530 -1.94063 0.67930  
C 2.93887 -2.00935 0.00314  
N -0.66549 -1.54662 0.67100  
C -1.72632 -0.80917 0.30947  
C -3.15043 -0.99382 0.71227  
O -3.70293 -1.75548 1.45937  
C -2.01932 0.32503 -0.43378  
N -1.38296 1.26113 -1.19670  
C 0.76479 1.53051 0.03784  
C 0.20740 1.50574 1.31923  
C 1.03640 1.39117 2.43341  
C 2.41792 1.30387 2.27004  
C 2.97586 1.35361 0.99113  
C 2.15338 1.47705 -0.12158  
C -3.47823 0.20724 -0.20183  
O -4.44199 0.80242 -0.60600  
H -1.95238 1.69894 -1.91816  
H -0.83952 -2.23679 1.39465  
H 1.67565 -2.11196 1.75135  
H -0.29801 -1.15183 -1.94612  
H 1.87485 -1.21172 -3.12436  
H 3.95500 -1.78007 -1.88432  
H 3.84203 -2.25736 0.55268  
H -0.86565 1.60048 1.45627  
H 0.60189 1.38091 3.42833  
H 3.06132 1.20997 3.14007  
H 4.05246 1.29351 0.86296  
H 2.56676 1.52413 -1.12424  
C -0.05360 1.70642 -1.19908  
O 0.36934 2.27511 -2.18473

34

SCF Energy = -989.797109358  
Enthalpy 0K = -989.538207  
Enthalpy 298K = -989.518870  
Free Energy 298K = -989.588397  
Lowest Frequencies = 18.1971 cm<sup>-1</sup>

#### ASQ1\_c

C -5.92830 -1.62963 -0.00684

C -4.99300 -2.47598 -0.60030  
C -3.65240 -2.10999 -0.65650  
C -3.23647 -0.89274 -0.10860  
C -4.16326 -0.04401 0.49911  
C -5.50440 -0.41766 0.53536  
N -1.86009 -0.58173 -0.16460  
C -1.26150 0.61561 0.00594  
C -1.67575 2.06648 0.09708  
O -2.70718 2.67741 0.10678  
C 0.07672 0.94510 0.09090  
N 1.20805 0.16761 0.13846  
C 3.60437 -0.26178 -0.08517  
C 3.67395 -1.06234 1.05915  
C 4.80872 -1.83361 1.30116  
C 5.87245 -1.80917 0.40063  
C 5.80907 -1.00143 -0.73584  
C 4.68109 -0.22374 -0.97549  
C -0.16934 2.40093 0.22182  
O 0.47787 3.39389 0.39249  
H 1.14646 -0.77422 0.50584  
H -1.25853 -1.34804 -0.44585  
H -3.85085 0.90391 0.92078  
H -2.92756 -2.76567 -1.13389  
H -5.30522 -3.42316 -1.02929  
H -6.97521 -1.91200 0.03281  
H -6.22174 0.25094 1.00108  
H 2.86932 -1.05630 1.79007  
H 4.86641 -2.44328 2.19743  
H 6.75549 -2.41215 0.58944  
H 6.64146 -0.97548 -1.43212  
H 4.61487 0.42290 -1.84500  
C 2.42361 0.59835 -0.40218  
O 2.48131 1.58434 -1.10048

33

SCF Energy = -989.276300545  
Enthalpy 0K = -989.030920  
Enthalpy 298K = -989.011992  
Free Energy 298K = -989.080384  
Lowest Frequencies = 18.8224 cm<sup>-1</sup>  
ASQ1b\_a  
C 5.58842 -1.79169 0.05119  
C 4.66589 -2.39992 0.90555  
C 3.35055 -1.95196 0.95834  
C 2.91396 -0.86679 0.17346  
C 3.84898 -0.27595 -0.69986  
C 5.16308 -0.73008 -0.75000

N 1.57200 -0.51192 0.25320  
C 1.19674 0.70962 0.05775  
C 1.80599 2.12559 -0.01406  
O 2.91909 2.59631 -0.02851  
C -0.08670 1.33523 0.01188  
N -1.40164 0.90900 0.12025  
C -3.37302 -0.48045 -0.14022  
C -4.00858 0.00975 1.00418  
C -5.35590 -0.26808 1.23266  
C -6.07582 -1.03740 0.32027  
C -5.44074 -1.53957 -0.81707  
C -4.09474 -1.26756 -1.04176  
C 0.38048 2.68047 0.00596  
O -0.14903 3.79218 0.05173  
H -2.05175 1.63423 0.40444  
H 3.53536 0.54820 -1.33173  
H 2.62239 -2.42613 1.61059  
H 4.97333 -3.23439 1.53231  
H 6.61591 -2.14245 0.00499  
H 5.86428 -0.24761 -1.42718  
H -3.44631 0.58183 1.73706  
H -5.83969 0.10996 2.12881  
H -7.12591 -1.25222 0.49848  
H -5.99636 -2.14593 -1.52698  
H -3.57340 -1.65867 -1.91021  
C -1.92013 -0.22552 -0.45183  
O -1.28519 -0.97603 -1.16989

33

SCF Energy = -989.289376561  
Enthalpy 0K = -989.043331  
Enthalpy 298K = -989.024989  
Free Energy 298K = -989.088983  
Lowest Frequencies = 49.2699 cm<sup>-1</sup>  
ASQ1b\_b  
C -2.94483 1.65568 -1.40538  
C -1.77555 1.34477 -2.09926  
C -0.54229 1.34919 -1.45250  
C -0.44399 1.65775 -0.07899  
C -1.62981 2.00365 0.59938  
C -2.85669 1.99111 -0.05034  
N 0.75836 1.71532 0.60996  
C 1.72275 0.90640 0.29567  
C 3.18609 0.95331 0.69273  
O 3.85212 1.66620 1.40383  
C 1.99607 -0.31721 -0.40390  
N 1.31625 -1.25953 -1.16324

C -0.80794 -1.46765 0.09902  
C -0.26232 -1.32329 1.37772  
C -1.10226 -1.15876 2.47732  
C -2.48497 -1.13651 2.30671  
C -3.03117 -1.29888 1.03261  
C -2.19668 -1.47444 -0.06453  
C 3.41400 -0.29195 -0.17230  
O 4.36392 -0.97829 -0.53583  
H 1.86849 -1.69756 -1.89684  
H -1.55343 2.25666 1.65329  
H 0.36349 1.12550 -2.00963  
H -1.82061 1.08695 -3.15487  
H -3.90695 1.64297 -1.91029  
H -3.75869 2.23619 0.50660  
H 0.81325 -1.33871 1.51978  
H -0.67031 -1.03551 3.46610  
H -3.13644 -0.98926 3.16426  
H -4.10849 -1.27270 0.89281  
H -2.59963 -1.60166 -1.06415  
C 0.02330 -1.72215 -1.12265  
O -0.41545 -2.39160 -2.05323

33

SCF Energy = -989.281553321  
Enthalpy OK = -989.035823  
Enthalpy 298K = -989.016967  
Free Energy 298K = -989.085483  
Lowest Frequencies = 22.0819 cm<sup>-1</sup>

ASQ1b\_c

C -5.43276 -2.16599 -0.11214  
C -4.27238 -2.94180 -0.15881  
C -3.01994 -2.33905 -0.13599  
C -2.87506 -0.93783 -0.06564  
C -4.05525 -0.16373 -0.01882  
C -5.30478 -0.77692 -0.04268  
N -1.57793 -0.44640 -0.04776  
C -1.29129 0.82856 0.00785  
C -1.83438 2.25365 0.07523  
O -2.91662 2.79643 0.09224  
C 0.01588 1.36874 0.03648  
N 1.12080 0.54282 0.02765  
C 3.41196 -0.25443 0.00021  
C 3.11332 -1.49470 0.57299  
C 4.07647 -2.50217 0.60738  
C 5.34347 -2.27941 0.07060  
C 5.64876 -1.03928 -0.49221  
C 4.68988 -0.03125 -0.52031

C -0.38107 2.75742 0.13119  
O 0.11380 3.86575 0.23054  
H 0.85071 -0.43821 -0.01690  
H -3.98663 0.91877 0.03418  
H -2.11280 -2.93630 -0.17352  
H -4.34395 -4.02604 -0.21404  
H -6.41392 -2.63260 -0.12992  
H -6.19557 -0.15349 -0.00606  
H 2.14019 -1.67778 1.02037  
H 3.83629 -3.45971 1.06046  
H 6.09189 -3.06663 0.09668  
H 6.63660 -0.85812 -0.90665  
H 4.90630 0.94710 -0.93831  
C 2.43700 0.89549 -0.06503  
O 2.82431 2.04335 -0.20119

33

SCF Energy = -989.302064678  
Enthalpy OK = -989.055816  
Enthalpy 298K = -989.037286  
Free Energy 298K = -989.104626  
Lowest Frequencies = 12.8871 cm<sup>-1</sup>

ASQ1c\_a

C 5.38701 -2.03741 -0.00000  
C 4.23139 -2.82060 -0.00002  
C 2.97516 -2.22729 -0.00002  
C 2.84508 -0.82614 -0.00000  
C 4.00463 -0.03478 0.00002  
C 5.25439 -0.64817 0.00002  
N 1.55970 -0.30634 0.00000  
C 1.12462 0.98006 0.00000  
C 1.71598 2.33607 -0.00000  
O 2.83209 2.82975 -0.00000  
C -0.20195 1.48330 -0.00000  
N -1.47443 1.07200 -0.00000  
C -3.26218 -0.52095 0.00000  
C -4.20658 0.51067 -0.00001  
C -5.56824 0.21385 -0.00001  
C -5.99892 -1.11396 -0.00000  
C -5.05941 -2.14568 0.00001  
C -3.69785 -1.84880 0.00001  
C 0.29565 2.88029 -0.00000  
O -0.20347 3.98512 -0.00001  
H 0.76828 -0.96213 0.00001  
H 3.91968 1.04784 0.00003  
H 2.07673 -2.83987 -0.00003  
H 4.30585 -3.90519 -0.00003

H 6.36931 -2.50055 -0.00000  
H 6.14160 -0.01988 0.00003  
H -3.84704 1.53437 -0.00001  
H -6.29648 1.02083 -0.00002  
H -7.06168 -1.34336 -0.00001  
H -5.38923 -3.18156 0.00001  
H -2.94713 -2.63299 0.00002  
C -1.77789 -0.23640 0.00001  
O -1.00388 -1.22006 0.00002

33

SCF Energy = -989.284068462  
Enthalpy 0K = -989.038549  
Enthalpy 298K = -989.019890  
Free Energy 298K = -989.085600  
Lowest Frequencies = 20.1441 cm<sup>-1</sup>

ASQ1c\_b

C -3.20495 2.01524 -0.66436  
C -2.07575 1.88262 -1.47190  
C -0.81925 1.66706 -0.91450  
C -0.68527 1.53862 0.47518  
C -1.81748 1.68619 1.29120  
C -3.06160 1.92787 0.72278  
N 0.54649 1.26187 1.05625  
C 1.65763 0.76361 0.43140  
C 3.01740 0.85820 0.90589  
O 3.53682 1.35823 1.89818  
C 1.97623 -0.07670 -0.67578  
N 1.42265 -0.70444 -1.68250  
C -0.58271 -1.55628 -0.48123  
C 0.11045 -2.06148 0.62118  
C -0.58100 -2.46808 1.76290  
C -1.97059 -2.36883 1.81296  
C -2.66974 -1.88101 0.70682  
C -1.97916 -1.48978 -0.43546  
C 3.43868 0.05242 -0.32031  
O 4.47340 -0.34705 -0.80210  
H 0.70393 1.57889 2.00630  
H -1.71551 1.56776 2.36740  
H 0.05312 1.57264 -1.55382  
H -2.16442 1.93549 -2.55323  
H -4.18260 2.18197 -1.10680  
H -3.93122 2.02467 1.36786  
H 1.19293 -2.14109 0.58594  
H -0.03060 -2.85866 2.61475  
H -2.50708 -2.67279 2.70843  
H -3.75303 -1.79601 0.73988

H -2.50158 -1.10406 -1.30583  
C 0.11132 -1.07032 -1.74653  
O -0.52687 -1.09954 -2.79714

33

SCF Energy = -989.289092798  
Enthalpy 0K = -989.043281  
Enthalpy 298K = -989.024463  
Free Energy 298K = -989.092535  
Lowest Frequencies = 21.9890 cm<sup>-1</sup>

ASQ1c\_c

C -5.71356 -1.84111 -0.08348  
C -4.64594 -2.72514 -0.24329  
C -3.33642 -2.25885 -0.25012  
C -3.06788 -0.88830 -0.09599  
C -4.13785 0.00664 0.06444  
C -5.44131 -0.48014 0.06847  
N -1.75022 -0.46049 -0.10689  
C -1.24382 0.80160 0.03021  
C -1.66365 2.18909 0.20300  
O -2.70949 2.81658 0.29066  
C 0.12832 1.09848 0.01293  
N 1.12500 0.22977 -0.06771  
C 3.48335 -0.29571 -0.12301  
C 3.25230 -1.53500 0.48022  
C 4.31085 -2.41084 0.71827  
C 5.61071 -2.05437 0.35718  
C 5.84645 -0.81631 -0.24285  
C 4.78736 0.05719 -0.48021  
C -0.17297 2.55366 0.26856  
O 0.43343 3.56846 0.50742  
H -1.02336 -1.16192 -0.22192  
H -3.94018 1.06996 0.18033  
H -2.50892 -2.95357 -0.37581  
H -4.83062 -3.78953 -0.36419  
H -6.73640 -2.20547 -0.07806  
H -6.25910 0.22489 0.19312  
H 2.23497 -1.79241 0.75558  
H 4.12249 -3.37290 1.18829  
H 6.43602 -2.73711 0.54370  
H 6.85758 -0.53261 -0.52394  
H 4.94198 1.02756 -0.94246  
C 2.36619 0.69291 -0.39167  
O 2.63972 1.77439 -0.90912

40

SCF Energy = -1663.72412977

Enthalpy OK = -1663.454016  
Enthalpy 298K = -1663.427797  
Free Energy 298K = -1663.517253  
Lowest Frequencies = 2.8631 cm-1

ASQ2\_a

C 5.63805 -1.01551 0.06989  
C 4.55400 -1.89303 0.02461  
C 3.26298 -1.39220 -0.01369  
C 3.04377 -0.00672 -0.00718  
C 4.12765 0.87241 0.03728  
C 5.42124 0.35861 0.07408  
N 1.70382 0.41289 -0.04060  
C 1.17556 1.64422 -0.06357  
C 1.67396 3.08508 -0.07878  
O 2.73614 3.64039 -0.07330  
C -0.14241 2.08608 -0.08509  
N -1.41593 1.56979 -0.07861  
C -3.20598 -0.08444 -0.05017  
C -4.15465 0.77900 0.50909  
C -5.49479 0.41193 0.53683  
C -5.88332 -0.81534 0.00161  
C -4.94463 -1.68603 -0.54630  
C -3.60293 -1.32029 -0.56497  
C 0.19757 3.50506 -0.09900  
O -0.44716 4.52455 -0.11808  
H -2.15088 2.26785 -0.13371  
H 0.99755 -0.32332 -0.07153  
H 3.97369 1.94508 0.04236  
H 2.41609 -2.07253 -0.04607  
H 4.72084 -2.96604 0.02324  
H 6.26383 1.04094 0.11067  
H -3.86144 1.72324 0.95914  
H -6.23570 1.07374 0.97442  
H -5.26044 -2.63892 -0.95699  
H -2.84984 -1.98280 -0.97852  
C -1.74773 0.23704 -0.10663  
O -0.89541 -0.63658 -0.18709  
C 7.02619 -1.58373 0.08339  
F 7.95761 -0.65474 0.34749  
F 7.15715 -2.55639 1.00595  
F 7.35040 -2.14195 -1.10037  
C -7.33665 -1.20460 0.07430  
F -8.13805 -0.18019 -0.26076  
F -7.62740 -2.22926 -0.73925  
F -7.68024 -1.57502 1.32083

SCF Energy = -1663.72066287  
Enthalpy OK = -1663.450922  
Enthalpy 298K = -1663.425089  
Free Energy 298K = -1663.508146  
Lowest Frequencies = 23.1141 cm-1

ASQ2\_b

C -1.84694 -1.97035 -0.68139  
C -0.64913 -2.52865 -0.24209  
C 0.55877 -1.93187 -0.58567  
C 0.55914 -0.76135 -1.35092  
C -0.64270 -0.21644 -1.81150  
C -1.84448 -0.82516 -1.47859  
N 1.77057 -0.12025 -1.67088  
C 2.90748 -0.18942 -0.95529  
C 4.29551 0.08836 -1.42967  
O 4.74594 0.46808 -2.47497  
C 3.32871 -0.43295 0.34195  
N 2.82627 -0.76228 1.56822  
C 0.64262 0.44407 1.56647  
C 1.10154 1.60755 0.94581  
C 0.18837 2.53262 0.44562  
C -1.17567 2.28677 0.57459  
C -1.64190 1.14909 1.23517  
C -0.72965 0.23445 1.74090  
C 4.76573 -0.28531 -0.00503  
O 5.78950 -0.43806 0.60355  
H 3.47825 -1.24010 2.18836  
H 1.85924 0.29627 -2.59279  
H -0.63504 0.69832 -2.39786  
H 1.49731 -2.37895 -0.27124  
H -0.65551 -3.42962 0.36303  
H -2.78155 -0.39437 -1.81864  
H 2.16508 1.80853 0.86209  
H 0.53637 3.43985 -0.03744  
H -2.70859 0.97671 1.34339  
H -1.06549 -0.65737 2.26095  
C 1.56045 -0.58844 2.14086  
O 1.26233 -1.24377 3.11665  
C -3.15756 -2.55038 -0.23541  
F -3.62744 -1.90877 0.85735  
F -4.10541 -2.44088 -1.17979  
F -3.05615 -3.84707 0.09116  
C -2.16795 3.21633 -0.06735  
F -1.67671 4.45291 -0.23278  
F -2.51929 2.76895 -1.29408  
F -3.29990 3.31873 0.64328



40

SCF Energy = -1663.70304668  
Enthalpy 0K = -1663.434289  
Enthalpy 298K = -1663.407655  
Free Energy 298K = -1663.497612  
Lowest Frequencies = 11.1500 cm<sup>-1</sup>

ASQ2\_c

C 5.83839 -1.09130 0.06360  
C 4.85129 -1.94195 0.55101  
C 3.53143 -1.51022 0.59433  
C 3.19374 -0.22903 0.14703  
C 4.18429 0.62593 -0.34740  
C 5.50119 0.18738 -0.38019  
N 1.83685 0.13878 0.19646  
C 1.26394 1.34183 -0.03713  
C 1.69684 2.77865 -0.24204  
O 2.73336 3.37324 -0.32843  
C -0.06968 1.68623 -0.11227  
N -1.21882 0.93338 -0.07814  
C -3.62219 0.59746 0.24388  
C -3.76047 -0.26205 -0.84721  
C -4.92695 -1.00854 -1.00544  
C -5.94545 -0.88879 -0.06634  
C -5.82127 -0.02025 1.02012  
C -4.66233 0.72767 1.17022  
C 0.19241 3.12716 -0.34644  
O -0.44603 4.11412 -0.56797  
H -1.19410 -0.02994 -0.39020  
H 1.21139 -0.59471 0.51180  
H 3.93859 1.62667 -0.68279  
H 2.76113 -2.17225 0.98215  
H 5.10897 -2.93618 0.89939  
H 6.27422 0.85039 -0.75767  
H -2.98570 -0.32786 -1.60616  
H -5.04560 -1.66942 -1.85698  
H -6.63089 0.06792 1.73850  
H -4.54326 1.42137 1.99627  
C -2.40248 1.43600 0.46833  
O -2.41276 2.46503 1.10203  
C 7.27317 -1.52496 -0.00738  
F 8.08264 -0.68254 0.66039  
F 7.46123 -2.75077 0.50785  
F 7.72225 -1.55504 -1.27694  
C -7.21556 -1.68604 -0.20003  
F -8.29035 -0.88568 -0.29939  
F -7.20676 -2.48239 -1.27889  
F -7.41559 -2.46929 0.87502

39

SCF Energy = -1663.20006755  
Enthalpy 0K = -1662.944752  
Enthalpy 298K = -1662.918500  
Free Energy 298K = -1663.007737  
Lowest Frequencies = 9.1172 cm<sup>-1</sup>

ASQ2b\_a

C 5.66167 -0.97766 0.11484  
C 4.72844 -1.67055 0.89209  
C 3.40838 -1.25275 0.92596  
C 2.97272 -0.12315 0.19864  
C 3.92665 0.54677 -0.59866  
C 5.24850 0.12693 -0.63363  
N 1.62935 0.19132 0.25980  
C 1.21368 1.40669 0.08015  
C 1.76945 2.84475 0.07301  
O 2.86242 3.35585 0.11245  
C -0.08862 1.97515 0.00696  
N -1.38380 1.48454 0.04752  
C -3.25770 -0.01100 -0.33173  
C -3.97243 0.41732 0.79144  
C -5.30614 0.05585 0.95281  
C -5.92657 -0.73692 -0.01164  
C -5.21894 -1.18367 -1.12665  
C -3.88464 -0.82270 -1.27937  
C 0.32026 3.34246 0.05386  
O -0.25760 4.42520 0.10820  
H -2.08272 2.16908 0.31678  
H 3.62146 1.40830 -1.18159  
H 2.67068 -1.78333 1.52010  
H 5.04214 -2.53551 1.47037  
H 5.96813 0.66504 -1.24390  
H -3.48300 1.00914 1.55921  
H -5.86253 0.38481 1.82549  
H -5.70960 -1.80496 -1.86867  
H -3.30216 -1.16347 -2.12943  
C -1.80944 0.33689 -0.57173  
O -1.10377 -0.36064 -1.27503  
C 7.06399 -1.47119 0.02704  
F 7.94206 -0.50421 -0.31256  
F 7.50379 -2.00298 1.19019  
F 7.22535 -2.45248 -0.89858  
C -7.35419 -1.14706 0.20102  
F -8.11174 -0.12679 0.64910  
F -7.93315 -1.60441 -0.92288  
F -7.46630 -2.12916 1.12017

39  
SCF Energy = -1663.21563641  
Enthalpy OK = -1662.959592  
Enthalpy 298K = -1662.934002  
Free Energy 298K = -1663.017369  
Lowest Frequencies = 16.3436 cm-1  
ASQ2b\_b  
C -1.72734 -2.00503 -0.69835  
C -0.51222 -2.55220 -0.28698  
C 0.68365 -1.93814 -0.63671  
C 0.69709 -0.74787 -1.40065  
C -0.54538 -0.24005 -1.84381  
C -1.73545 -0.84762 -1.48780  
N 1.84833 -0.10309 -1.79159  
C 2.90519 -0.13151 -1.03128  
C 4.33864 0.22672 -1.37265  
O 4.89928 0.64305 -2.35507  
C 3.31849 -0.36302 0.31777  
N 2.77641 -0.75062 1.53416  
C 0.58981 0.42085 1.50351  
C 1.01859 1.57666 0.84709  
C 0.08449 2.48888 0.36339  
C -1.27377 2.24177 0.54125  
C -1.71077 1.10327 1.22052  
C -0.77647 0.20300 1.71075  
C 4.72220 -0.15060 0.06508  
O 5.74101 -0.25422 0.73422  
H 3.41902 -1.25253 2.14358  
H -0.53869 0.66018 -2.45126  
H 1.62702 -2.38231 -0.33225  
H -0.49974 -3.45667 0.31456  
H -2.68101 -0.42014 -1.81205  
H 2.07666 1.77008 0.70650  
H 0.41500 3.38101 -0.15819  
H -2.77248 0.91629 1.35092  
H -1.08907 -0.68974 2.24264  
C 1.53398 -0.58456 2.09593  
O 1.22613 -1.20999 3.10373  
C -3.01880 -2.59726 -0.25081  
F -3.53911 -1.96157 0.83240  
F -3.97940 -2.53152 -1.19876  
F -2.90919 -3.89348 0.10319  
C -2.28870 3.16693 -0.05958  
F -1.81135 4.41272 -0.24031  
F -2.70815 2.74006 -1.27059  
F -3.39510 3.27799 0.70234

39  
SCF Energy = -1663.20503595  
Enthalpy OK = -1662.949400  
Enthalpy 298K = -1662.923237  
Free Energy 298K = -1663.011595  
Lowest Frequencies = 14.4287 cm-1  
ASQ2b\_c  
C -5.32121 -1.33219 -0.06439  
C -4.14729 -2.08629 -0.11000  
C -2.91590 -1.44915 -0.09656  
C -2.80562 -0.04246 -0.03449  
C -4.00875 0.70405 0.01304  
C -5.23756 0.06299 -0.00130  
N -1.52919 0.47797 -0.02673  
C -1.27534 1.76496 0.02435  
C -1.85837 3.17305 0.09286  
O -2.95414 3.68366 0.11710  
C 0.01459 2.33255 0.04154  
N 1.14172 1.53831 0.02435  
C 3.45906 0.82110 -0.02638  
C 3.21347 -0.42384 0.55645  
C 4.21026 -1.39839 0.58353  
C 5.45424 -1.12185 0.02609  
C 5.71488 0.12412 -0.54913  
C 4.72095 1.09198 -0.56700  
C -0.41591 3.71568 0.13483  
O 0.05511 4.83146 0.22585  
H 0.90168 0.54937 -0.02005  
H -3.96982 1.78810 0.05849  
H -1.99568 -2.02431 -0.13682  
H -4.19950 -3.16971 -0.16034  
H -6.14954 0.65433 0.03362  
H 2.25541 -0.64098 1.01957  
H 4.01971 -2.36289 1.04174  
H 6.69297 0.32962 -0.97510  
H 4.89622 2.07555 -0.99091  
C 2.44298 1.93694 -0.08022  
O 2.79278 3.09537 -0.21688  
C -6.66128 -1.98130 -0.05044  
F -7.50677 -1.45572 -0.96793  
F -6.60652 -3.30722 -0.29648  
F -7.30156 -1.84770 1.13817  
C 6.54939 -2.14729 0.03116  
F 7.65366 -1.70124 0.66452  
F 6.18783 -3.29186 0.63501  
F 6.94173 -2.47015 -1.21837

39  
SCF Energy = -1663.22615080  
Enthalpy 0K = -1662.969867  
Enthalpy 298K = -1662.944037  
Free Energy 298K = -1663.031956  
Lowest Frequencies = 7.3108 cm<sup>-1</sup>  
ASQ2c\_a  
C 5.56057 -1.02716 0.02684  
C 4.46014 -1.88961 0.01580  
C 3.17568 -1.37661 0.00613  
C 2.95800 0.01750 0.00555  
C 4.06674 0.88071 0.01441  
C 5.35162 0.35172 0.02311  
N 1.64929 0.45106 -0.00140  
C 1.13325 1.71131 -0.00123  
C 1.64214 3.10106 0.00120  
O 2.72476 3.65946 0.00391  
C -0.21918 2.12735 -0.00369  
N -1.46304 1.63479 -0.00677  
C -3.14200 -0.06746 -0.01388  
C -4.14819 0.90495 -0.01015  
C -5.48583 0.52652 -0.01641  
C -5.82208 -0.82898 -0.02833  
C -4.82818 -1.80574 -0.02897  
C -3.49044 -1.41943 -0.02341  
C 0.18688 3.55630 -0.00128  
O -0.38238 4.62363 -0.00122  
H 0.89948 -0.25295 -0.00551  
H 3.91624 1.95605 0.01577  
H 2.31866 -2.04485 0.00172  
H 4.61336 -2.96538 0.01976  
H 6.20169 1.02680 0.03232  
H -3.85441 1.94901 -0.00507  
H -6.26997 1.27839 -0.01834  
H -5.09892 -2.85673 -0.04050  
H -2.69273 -2.15498 -0.02833  
C -1.67763 0.31112 -0.01059  
O -0.84564 -0.62307 -0.01244  
C 6.93475 -1.60549 0.00138  
F 7.89079 -0.69776 0.27565  
F 7.08681 -2.61247 0.89196  
F 7.25560 -2.14107 -1.20180  
C -7.26889 -1.21618 0.00748  
F -8.02306 -0.45464 -0.81149  
F -7.47488 -2.49740 -0.35274  
F -7.80585 -1.07753 1.24059

39  
SCF Energy = -1663.20828223  
Enthalpy 0K = -1662.952568  
Enthalpy 298K = -1662.926801  
Free Energy 298K = -1663.010708  
Lowest Frequencies = 13.3166 cm<sup>-1</sup>  
ASQ2c\_b  
C -1.98132 -1.94102 -0.64919  
C -0.81855 -2.51258 -0.13342  
C 0.42484 -2.00165 -0.47856  
C 0.51399 -0.88223 -1.32233  
C -0.66101 -0.32634 -1.85855  
C -1.89634 -0.85267 -1.52289  
N 1.73728 -0.31400 -1.61922  
C 2.89589 -0.43708 -0.89342  
C 4.23151 -0.16045 -1.36746  
O 4.69190 0.20590 -2.44068  
C 3.28419 -0.64816 0.46098  
N 2.80838 -0.93800 1.64454  
C 0.69830 0.39651 1.56758  
C 1.26081 1.53645 0.99052  
C 0.44472 2.54783 0.48584  
C -0.93981 2.41921 0.56634  
C -1.51523 1.30448 1.18025  
C -0.69369 0.30805 1.68802  
C 4.73004 -0.47439 0.04499  
O 5.79186 -0.53011 0.61510  
H 1.82504 0.21598 -2.47935  
H -0.59567 0.54982 -2.49850  
H 1.32867 -2.45015 -0.07781  
H -0.87776 -3.35358 0.55045  
H -2.80139 -0.40118 -1.91927  
H 2.33950 1.63694 0.92729  
H 0.88487 3.42896 0.02916  
H -2.59577 1.21205 1.24509  
H -1.11229 -0.57317 2.16381  
C 1.51925 -0.79382 2.05615  
O 0.98738 -1.54910 2.86586  
C -3.32391 -2.42737 -0.21459  
F -3.83144 -1.69846 0.80895  
F -4.24223 -2.35591 -1.20290  
F -3.30417 -3.70472 0.20948  
C -1.82761 3.44436 -0.06840  
F -1.23634 4.64910 -0.18144  
F -2.19805 3.08762 -1.32132  
F -2.97226 3.63238 0.61710

39

SCF Energy = -1663.21264311  
Enthalpy 0K = -1662.956856  
Enthalpy 298K = -1662.930749  
Free Energy 298K = -1663.018905  
Lowest Frequencies = 10.4441 cm-1

ASQ2c\_c

C -5.61235 -1.17117 -0.07724  
C -4.53208 -2.02271 -0.30552  
C -3.24114 -1.51622 -0.32328  
C -3.00628 -0.14613 -0.10882  
C -4.09833 0.71165 0.12274  
C -5.38275 0.19147 0.13673  
N -1.70923 0.31862 -0.13298  
C -1.23706 1.59152 0.05190  
C -1.69976 2.95418 0.30181  
O -2.76233 3.53738 0.44613  
C 0.12162 1.93242 0.01469  
N 1.14692 1.10572 -0.13121  
C 3.51935 0.67870 -0.28002  
C 3.35387 -0.59786 0.25916  
C 4.44961 -1.44405 0.42218  
C 5.71655 -1.00525 0.04518  
C 5.89517 0.27207 -0.49204  
C 4.79769 1.10807 -0.65148  
C -0.21779 3.36672 0.34404  
O 0.36308 4.38634 0.61278  
H -0.96520 -0.35365 -0.30174  
H -3.92905 1.77405 0.28330  
H -2.40056 -2.18058 -0.50643  
H -4.69919 -3.08170 -0.47429  
H -6.22297 0.85779 0.31283  
H 2.35686 -0.91263 0.54706  
H 4.32119 -2.43670 0.84139  
H 6.88964 0.60294 -0.77970  
H 4.89963 2.10739 -1.06268  
C 2.35635 1.63514 -0.46646  
O 2.57799 2.74912 -0.93482  
C -7.00791 -1.69449 -0.01595  
F -7.87258 -0.94636 -0.73517  
F -7.11099 -2.95755 -0.47669  
F -7.50484 -1.71066 1.24371  
C 6.91750 -1.88721 0.19881  
F 7.87142 -1.32140 0.96980  
F 6.62733 -3.07762 0.75529  
F 7.51215 -2.14988 -0.98600

46

SCF Energy = -2337.62298343  
Enthalpy 0K = -2337.343272  
Enthalpy 298K = -2337.309608  
Free Energy 298K = -2337.417763  
Lowest Frequencies = 7.5057 cm-1

ASQ3\_a

C -5.66555 0.98522 0.23702  
C -4.56396 1.82687 0.28490  
C -3.27018 1.32736 0.16766  
C -3.06489 -0.04290 -0.00006  
C -4.16331 -0.91029 -0.04962  
C -5.44048 -0.38115 0.06920  
N -1.73420 -0.47505 -0.10211  
C -1.23122 -1.70193 -0.30828  
C -1.76687 -3.11224 -0.53241  
O -2.84404 -3.63161 -0.59912  
C 0.07385 -2.16500 -0.40607  
N 1.36050 -1.68485 -0.33637  
C 3.18197 -0.08168 -0.07984  
C 4.12215 -1.02756 0.32035  
C 5.47011 -0.67377 0.39245  
C 5.88603 0.60936 0.06968  
C 4.93262 1.55295 -0.31993  
C 3.58898 1.22172 -0.38932  
C -0.30024 -3.56003 -0.62913  
O 0.31978 -4.57737 -0.80824  
H 2.07692 -2.38444 -0.50467  
H -1.01473 0.24569 -0.03353  
H -4.02912 -1.97857 -0.18029  
H -2.42254 2.00725 0.20939  
H -6.67287 1.37612 0.33135  
H 3.83123 -2.03360 0.61212  
H 6.93671 0.87807 0.12316  
H 2.84380 1.95511 -0.67912  
C 1.71754 -0.37067 -0.17098  
O 0.88554 0.52311 -0.11281  
C -6.64098 -1.28990 -0.00012  
F -6.30303 -2.58343 -0.01703  
F -7.45836 -1.09588 1.05008  
F -7.36951 -1.04734 -1.10478  
C -4.73122 3.31308 0.45695  
F -6.01185 3.66432 0.62672  
F -4.04314 3.76321 1.52145  
F -4.26669 3.98500 -0.61186  
C 6.45607 -1.71288 0.86054

F 6.30532 -2.86258 0.18224  
F 7.72260 -1.31062 0.70715  
F 6.27506 -2.00157 2.15994  
C 5.40857 2.93997 -0.66883  
F 6.23921 2.91369 -1.72433  
F 4.39571 3.76077 -0.96974  
F 6.09049 3.48794 0.34986

46

SCF Energy = -2337.62233701  
Enthalpy OK = -2337.342945  
Enthalpy 298K = -2337.309658  
Free Energy 298K = -2337.411088  
Lowest Frequencies = 15.7876 cm-1

ASQ3\_b

C -2.05803 1.32979 1.18287  
C -0.94283 2.09285 0.85252  
C 0.35000 1.59797 0.99779  
C 0.53440 0.29307 1.45964  
C -0.57406 -0.48530 1.80339  
C -1.85227 0.04215 1.67236  
N 1.81656 -0.25400 1.61194  
C 2.96450 0.18749 1.05612  
C 4.34026 -0.03694 1.59682  
O 4.75733 -0.63751 2.54614  
C 3.43870 0.83941 -0.06891  
N 3.01917 1.43662 -1.22314  
C 0.96544 0.12426 -1.73664  
C 1.41584 -1.12720 -1.32824  
C 0.48878 -2.14163 -1.08685  
C -0.87249 -1.92220 -1.25235  
C -1.30572 -0.67191 -1.69941  
C -0.39850 0.34261 -1.95814  
C 4.85503 0.78023 0.38930  
O 5.88065 1.22780 -0.04124  
H 3.68565 2.09315 -1.62899  
H 1.94531 -0.92471 2.36505  
H -0.43393 -1.50343 2.15902  
H 1.20443 2.22891 0.76408  
H -3.05995 1.72613 1.06322  
H 2.47553 -1.32711 -1.19821  
H -1.59022 -2.70758 -1.03229  
H -0.72807 1.31697 -2.30583  
C 1.87386 1.28147 -2.00829  
O 1.65191 2.07197 -2.89805  
C -1.10051 3.48228 0.29234  
F -0.71317 3.52431 -0.99699

F -2.36523 3.91233 0.34707  
F -0.33631 4.36683 0.95318  
C -3.01306 -0.81900 2.10042  
F -2.91720 -2.05786 1.58488  
F -3.03706 -0.96089 3.43787  
F -4.19050 -0.30857 1.72999  
C -2.77907 -0.43846 -1.90958  
F -3.20836 -0.98859 -3.05569  
F -3.50273 -0.98309 -0.91715  
F -3.07555 0.86856 -1.95487  
C 0.97283 -3.45247 -0.53041  
F 2.18461 -3.77922 -0.99852  
F 1.08163 -3.38585 0.81681  
F 0.13691 -4.46014 -0.80338

46

SCF Energy = -2337.60219830  
Enthalpy OK = -2337.323832  
Enthalpy 298K = -2337.289793  
Free Energy 298K = -2337.398316  
Lowest Frequencies = 6.9139 cm-1

ASQ3\_c

C 5.95550 0.85113 -0.05716  
C 5.04097 1.72565 -0.64187  
C 3.69617 1.40213 -0.73624  
C 3.23912 0.18226 -0.22457  
C 4.13450 -0.69826 0.37998  
C 5.48304 -0.35408 0.44468  
N 1.86225 -0.09246 -0.30640  
C 1.25618 -1.29952 -0.21691  
C 1.69045 -2.74835 -0.25089  
O 2.73251 -3.33411 -0.31018  
C -0.07451 -1.64559 -0.14602  
N -1.22468 -0.90111 -0.03145  
C -3.64208 -0.55358 -0.21273  
C -3.74295 0.15033 0.98663  
C -4.91308 0.84557 1.28311  
C -5.98663 0.84669 0.39952  
C -5.87904 0.12912 -0.78997  
C -4.72162 -0.57609 -1.09761  
C 0.18696 -3.11004 -0.13348  
O -0.45471 -4.11329 -0.03615  
H -1.18551 0.01127 0.40718  
H 1.27470 0.69662 -0.55150  
H 3.79999 -1.64481 0.78891  
H 3.00467 2.09487 -1.20714  
H 7.00594 1.11224 0.01481

H -2.93676 0.13905 1.71594  
H -6.89220 1.39568 0.63302  
H -4.63853 -1.14750 -2.01820  
C -2.42255 -1.33130 -0.60356  
O -2.45579 -2.25460 -1.38149  
C -7.02457 0.08932 -1.76936  
F -7.53764 -1.14648 -1.86903  
F -8.01960 0.91282 -1.41243  
F -6.62303 0.44707 -2.99983  
C -4.99341 1.57472 2.59835  
F -5.00477 0.71765 3.63238  
F -3.92570 2.37575 2.77361  
F -6.08985 2.33551 2.69038  
C 5.54910 3.02725 -1.20364  
F 6.30216 2.82789 -2.29793  
F 4.54892 3.85216 -1.55284  
F 6.31691 3.67776 -0.31545  
C 6.43874 -1.34291 1.06367  
F 6.71243 -2.35036 0.22117  
F 7.60574 -0.76943 1.39329  
F 5.92629 -1.88845 2.17814

45

SCF Energy = -2337.11120874  
Enthalpy OK = -2336.846192  
Enthalpy 298K = -2336.812555  
Free Energy 298K = -2336.920336  
Lowest Frequencies = 8.6117 cm<sup>-1</sup>

ASQ3b\_a

C -5.68752 0.93924 0.03676  
C -4.75715 1.62906 0.80472  
C -3.42920 1.21924 0.87982  
C -2.98279 0.07421 0.19770  
C -3.92508 -0.61407 -0.60222  
C -5.24086 -0.18322 -0.66548  
N -1.64363 -0.24671 0.28562  
C -1.25408 -1.48100 0.18643  
C -1.85699 -2.89431 0.27317  
O -2.96925 -3.35531 0.34816  
C 0.02793 -2.08981 0.15532  
N 1.33466 -1.62720 0.16260  
C 3.22253 -0.17987 -0.32551  
C 3.93241 -0.51597 0.82294  
C 5.27136 -0.13525 0.95084  
C 5.90761 0.57823 -0.05289  
C 5.18200 0.92229 -1.19656  
C 3.85162 0.55844 -1.33525

C -0.42268 -3.44115 0.28514  
O 0.12009 -4.53383 0.40641  
H 2.02108 -2.30363 0.48066  
H -3.61360 -1.48576 -1.16554  
H -2.70823 1.77396 1.47333  
H -6.71995 1.26423 -0.02694  
H 3.44750 -1.04642 1.63840  
H 6.94794 0.87048 0.04896  
H 3.27272 0.83675 -2.21015  
C 1.77199 -0.53546 -0.54017  
O 1.07763 0.11788 -1.29443  
C -6.24397 -0.91709 -1.50690  
F -5.71113 -1.92767 -2.20690  
F -7.24415 -1.43656 -0.76263  
F -6.84361 -0.09632 -2.40118  
C -5.16159 2.85596 1.56657  
F -6.47481 3.13253 1.45233  
F -4.90386 2.74596 2.88661  
F -4.49931 3.95637 1.15086  
C 6.00061 -0.50350 2.21267  
F 5.97685 -1.83109 2.42986  
F 7.29030 -0.12871 2.18608  
F 5.44308 0.07046 3.29412  
C 5.89061 1.70488 -2.26670  
F 6.97758 1.04777 -2.71957  
F 5.11048 1.95957 -3.32390  
F 6.33491 2.88910 -1.80122

45

SCF Energy = -2337.12735296  
Enthalpy OK = -2336.861644  
Enthalpy 298K = -2336.828654  
Free Energy 298K = -2336.929438  
Lowest Frequencies = 19.1832 cm<sup>-1</sup>

ASQ3b\_b

C -1.76914 1.70066 1.04205  
C -0.59998 2.37790 0.69791  
C 0.65634 1.82758 0.91534  
C 0.78753 0.54013 1.48978  
C -0.39565 -0.12068 1.87749  
C -1.63919 0.44953 1.64304  
N 1.99092 -0.06759 1.74989  
C 3.03195 0.18655 1.00448  
C 4.49696 -0.08874 1.28738  
O 5.10543 -0.59652 2.19292  
C 3.39867 0.67380 -0.28437  
N 2.80723 1.20713 -1.41962

C 0.70984 -0.11453 -1.56512  
C 1.21116 -1.31622 -1.05687  
C 0.32793 -2.33780 -0.72614  
C -1.04605 -2.18995 -0.90092  
C -1.52947 -1.00323 -1.44136  
C -0.66130 0.02958 -1.77930  
C 4.82339 0.54943 -0.07301  
O 5.81348 0.85418 -0.71818  
H 3.39880 1.85001 -1.94298  
H -0.30543 -1.09848 2.34255  
H 1.54751 2.39021 0.65572  
H -2.74501 2.13215 0.84719  
H 2.27674 -1.45941 -0.91577  
H -1.72701 -2.98649 -0.61688  
H -1.03080 0.95970 -2.20224  
C 1.57614 1.03328 -2.00047  
O 1.20631 1.77360 -2.90216  
C -0.73891 3.72292 0.04394  
F -1.35528 3.63441 -1.15243  
F -1.48910 4.56694 0.78649  
F 0.43905 4.32937 -0.16359  
C -2.86314 -0.29546 2.09261  
F -2.77333 -1.61674 1.84415  
F -3.06784 -0.17627 3.42224  
F -3.98384 0.14253 1.49283  
C -2.99747 -0.84104 -1.72020  
F -3.28101 -1.07133 -3.02100  
F -3.74970 -1.69417 -1.00694  
F -3.42929 0.40132 -1.45206  
C 0.83091 -3.62351 -0.13275  
F 2.16610 -3.71217 -0.14887  
F 0.43036 -3.77242 1.14273  
F 0.35313 -4.69544 -0.80369

45

SCF Energy = -2337.11510158  
Enthalpy 0K = -2336.849838  
Enthalpy 298K = -2336.816256  
Free Energy 298K = -2336.924222  
Lowest Frequencies = 7.7994 cm<sup>-1</sup>

ASQ3b\_c

C 5.45454 1.10701 -0.30532  
C 4.28756 1.86802 -0.40576  
C 3.03446 1.28954 -0.29324  
C 2.88375 -0.09965 -0.07614  
C 4.06293 -0.86879 0.02543  
C 5.31034 -0.25893 -0.08801

N 1.59160 -0.56591 0.01549  
C 1.29808 -1.83152 0.20846  
C 1.84942 -3.23887 0.41207  
O 2.93441 -3.76779 0.45871  
C -0.00277 -2.35607 0.31637  
N -1.11784 -1.54559 0.24933  
C -3.43546 -0.83159 0.12386  
C -3.19954 0.44833 0.63723  
C -4.20718 1.40521 0.59362  
C -5.45499 1.11299 0.04441  
C -5.68315 -0.16414 -0.45171  
C -4.68652 -1.13701 -0.40699  
C 0.39431 -3.73324 0.55530  
O -0.10485 -4.81339 0.79040  
H -0.86747 -0.56665 0.12054  
H 4.00183 -1.94165 0.19288  
H 2.13453 1.88990 -0.37373  
H 6.43315 1.56506 -0.39318  
H -2.24783 0.70112 1.09431  
H -6.23352 1.86849 0.01284  
H -4.86095 -2.14493 -0.77389  
C -2.41728 -1.94725 0.14292  
O -2.77053 -3.10862 0.05969  
C -7.01064 -0.52321 -1.05997  
F -7.54491 -1.61268 -0.48242  
F -7.91022 0.46930 -0.94433  
F -6.89699 -0.80049 -2.37185  
C -3.99355 2.77912 1.16569  
F -4.77486 2.99249 2.24342  
F -2.72710 2.98698 1.54735  
F -4.30921 3.73925 0.27546  
C 4.42554 3.34828 -0.60185  
F 5.30394 3.65053 -1.58188  
F 3.26578 3.94821 -0.92102  
F 4.88565 3.96791 0.50816  
C 6.53158 -1.13145 -0.01275  
F 6.68642 -1.88274 -1.12242  
F 7.66803 -0.41552 0.12192  
F 6.48713 -1.98693 1.02255

45

SCF Energy = -2337.13658024  
Enthalpy 0K = -2336.870718  
Enthalpy 298K = -2336.837435  
Free Energy 298K = -2336.945125  
Lowest Frequencies = 5.9428 cm<sup>-1</sup>

ASQ3c\_a

C -5.59627 0.98853 0.00066  
C -4.48405 1.81996 0.00516  
C -3.19192 1.30569 0.00782  
C -2.98081 -0.08202 0.00624  
C -4.09912 -0.93952 0.00226  
C -5.37194 -0.38997 -0.00027  
N -1.67816 -0.53016 0.00890  
C -1.17993 -1.79876 0.00697  
C -1.71541 -3.17877 0.00491  
O -2.81004 -3.71041 0.00444  
C 0.16241 -2.23781 0.00602  
N 1.41456 -1.76293 0.00562  
C 3.11204 -0.08518 0.00757  
C 4.10290 -1.06406 -0.00543  
C 5.44789 -0.68945 -0.01019  
C 5.81893 0.64911 -0.00068  
C 4.81774 1.62132 0.01315  
C 3.47498 1.26507 0.01619  
C -0.26681 -3.66117 0.00354  
O 0.28419 -4.73610 0.00138  
H -0.91926 0.16456 0.01301  
H -3.96077 -2.01804 0.00169  
H -2.33726 1.97783 0.01190  
H -6.60237 1.39224 -0.00088  
H 3.80186 -2.10781 -0.01237  
H 6.86597 0.93509 -0.00314  
H 2.68777 2.01154 0.02697  
C 1.64282 -0.44438 0.01147  
O 0.82871 0.50487 0.01990  
C -6.57929 -1.28600 -0.00225  
F -6.27135 -2.58583 -0.01166  
F -7.35910 -1.06797 1.07956  
F -7.36606 -1.05392 -1.07608  
C -4.64711 3.31286 -0.00701  
F -5.93494 3.69250 0.06625  
F -4.00643 3.89945 1.02295  
F -4.14105 3.86558 -1.12777  
C 6.49286 -1.76847 -0.01273  
F 6.33744 -2.61741 -1.04430  
F 7.74262 -1.27262 -0.09830  
F 6.44732 -2.51544 1.10646  
C 5.23794 3.06210 0.00627  
F 5.87443 3.39404 -1.13775  
F 4.20571 3.90689 0.13820  
F 6.10465 3.33639 1.00437

SCF Energy = -2337.11871659  
Enthalpy OK = -2336.853459  
Enthalpy 298K = -2336.820255  
Free Energy 298K = -2336.921808  
Lowest Frequencies = 14.7621 cm-1  
ASQ3c\_b

C -2.07924 1.48511 0.98220  
C -0.99530 2.26477 0.57784  
C 0.31539 1.87163 0.80290  
C 0.56836 0.63788 1.43153  
C -0.51213 -0.14657 1.85777  
C -1.81397 0.28552 1.63464  
N 1.85728 0.18583 1.62149  
C 2.98486 0.60812 0.95619  
C 4.35012 0.46297 1.41131  
O 4.86402 0.01058 2.42242  
C 3.32929 1.09862 -0.33362  
N 2.81378 1.51765 -1.46119  
C 0.84170 -0.01756 -1.62878  
C 1.48310 -1.16017 -1.15616  
C 0.73481 -2.29251 -0.82884  
C -0.64555 -2.31511 -0.98802  
C -1.27322 -1.18523 -1.51233  
C -0.54209 -0.04974 -1.83407  
C 4.79023 1.06838 0.07268  
O 5.82625 1.36808 -0.46357  
H 2.02473 -0.48253 2.36626  
H -0.32633 -1.10796 2.33026  
H 1.14083 2.50174 0.48503  
H -3.09764 1.80446 0.78942  
H 2.56059 -1.17111 -1.02517  
H -1.22300 -3.19089 -0.70914  
H -1.02208 0.84312 -2.22482  
C 1.54610 1.31115 -1.90387  
O 0.93031 2.12833 -2.58133  
C -1.28934 3.55870 -0.13294  
F -1.86804 3.34647 -1.32725  
F -2.16211 4.31191 0.57732  
F -0.19936 4.30314 -0.33084  
C -2.94486 -0.55508 2.15644  
F -2.70351 -1.87145 2.01756  
F -3.14864 -0.34672 3.47618  
F -4.10811 -0.29150 1.54266  
C -2.75391 -1.21983 -1.76211  
F -3.04460 -1.73939 -2.97479  
F -3.39899 -1.98276 -0.86018  
F -3.30993 0.00064 -1.72379



C 1.42488 -3.46732 -0.20006  
F 2.66578 -3.64833 -0.67642  
F 1.54377 -3.31240 1.13809  
F 0.75212 -4.61845 -0.38857

45

SCF Energy = -2337.12278043  
Enthalpy OK = -2336.857453  
Enthalpy 298K = -2336.823847  
Free Energy 298K = -2336.933210  
Lowest Frequencies = 6.0467 cm-1

ASQ3c\_c

C 5.68941 0.90650 -0.19544  
C 4.61568 1.77211 -0.40936  
C 3.30604 1.32351 -0.38324  
C 3.03037 -0.03499 -0.13671  
C 4.09697 -0.91964 0.07974  
C 5.40075 -0.43116 0.04602  
N 1.71659 -0.44912 -0.11675  
C 1.20922 -1.70361 0.10133  
C 1.64633 -3.07321 0.36484  
O 2.69942 -3.67365 0.49365  
C -0.15549 -2.01066 0.10361  
N -1.16690 -1.16247 -0.03248  
C -3.52308 -0.67660 -0.15263  
C -3.31223 0.60856 0.34502  
C -4.38736 1.48291 0.49581  
C -5.68135 1.09591 0.15941  
C -5.88196 -0.19075 -0.33473  
C -4.81671 -1.07422 -0.48982  
C 0.15459 -3.44886 0.44820  
O -0.44581 -4.44745 0.74548  
H 0.99413 0.24759 -0.27848  
H 3.90451 -1.97608 0.26836  
H 2.48904 2.01841 -0.55261  
H 6.71113 1.26774 -0.21724  
H -2.30183 0.90645 0.60780  
H -6.51313 1.78086 0.27693  
H -4.96047 -2.08095 -0.87345  
C -2.39128 -1.67186 -0.33137  
O -2.65990 -2.78993 -0.76163  
C -7.26336 -0.65862 -0.69175  
F -7.70070 -1.62346 0.14098  
F -8.17189 0.33473 -0.64368  
F -7.31570 -1.17727 -1.93247  
C -4.11888 2.85861 1.03306  
F -3.57417 2.82175 2.26442

F -3.25300 3.54211 0.25885  
F -5.23501 3.60591 1.12245  
C 4.91838 3.21848 -0.67637  
F 5.66686 3.37660 -1.78688  
F 3.81175 3.96152 -0.84224  
F 5.62008 3.77755 0.32991  
C 6.51901 -1.41029 0.28406  
F 6.52218 -2.39948 -0.62520  
F 7.73093 -0.82291 0.22652  
F 6.42631 -1.99344 1.49126

38

SCF Energy = -1398.67996206  
Enthalpy OK = -1398.413942  
Enthalpy 298K = -1398.389977  
Free Energy 298K = -1398.470925  
Lowest Frequencies = 17.3513 cm-1

ASQ4\_a

C 5.58257 -1.23107 0.07929  
C 4.50772 -2.11329 0.06450  
C 3.22430 -1.59404 0.02566  
C 3.02025 -0.20537 0.00257  
C 4.11466 0.66724 0.01824  
C 5.40180 0.14655 0.05650  
N 1.68849 0.22686 -0.03212  
C 1.17304 1.46577 -0.07598  
C 1.68862 2.90067 -0.11935  
O 2.75654 3.44313 -0.12751  
C -0.13905 1.91977 -0.10117  
N -1.41842 1.41875 -0.08134  
C -3.22639 -0.21558 -0.02084  
C -4.16024 0.66159 0.54099  
C -5.50655 0.31481 0.58096  
C -5.88556 -0.91071 0.05028  
C -4.97959 -1.80678 -0.50349  
C -3.63666 -1.45184 -0.52894  
C 0.21584 3.33663 -0.14243  
O -0.41885 4.36049 -0.17805  
H -2.14559 2.12414 -0.14941  
H 0.97368 -0.50175 -0.04534  
H 3.97032 1.74100 -0.00126  
H 2.37003 -2.26530 0.01370  
H 4.68461 -3.18204 0.08324  
H 6.26475 0.80196 0.06879  
H -3.85244 1.60304 0.98661  
H -6.25141 0.96890 1.01812  
H -5.32859 -2.75345 -0.89837

H -2.89211 -2.12455 -0.94105  
C -1.76364 0.08973 -0.08296  
O -0.92251 -0.79535 -0.14555  
N 6.94494 -1.77285 0.12036  
O 7.06922 -2.98575 0.13955  
O 7.86917 -0.97889 0.13283  
N -7.31626 -1.28165 0.08582  
O -7.62540 -2.35754 -0.38937  
O -8.08705 -0.48538 0.58721

38

SCF Energy = -1398.67358925  
Enthalpy 0K = -1398.408267  
Enthalpy 298K = -1398.384430  
Free Energy 298K = -1398.463189  
Lowest Frequencies = 24.9639 cm-1

ASQ4\_b

C -2.15797 -1.94223 -0.69640  
C -0.97618 -2.48942 -0.21205  
C 0.22705 -1.88309 -0.54718  
C 0.22802 -0.73198 -1.34601  
C -0.97299 -0.21217 -1.84354  
C -2.17652 -0.82078 -1.52008  
N 1.43372 -0.09096 -1.66658  
C 2.57782 -0.16115 -0.95715  
C 3.96392 0.10241 -1.44766  
O 4.40759 0.46654 -2.50017  
C 3.00539 -0.38943 0.33921  
N 2.51061 -0.69394 1.57467  
C 0.33304 0.52355 1.55523  
C 0.79741 1.67778 0.91963  
C -0.10900 2.59768 0.40040  
C -1.46465 2.33225 0.53432  
C -1.95494 1.21512 1.20273  
C -1.03998 0.31360 1.72748  
C 4.44353 -0.25474 -0.02013  
O 5.46850 -0.40481 0.58439  
H 3.16521 -1.16067 2.20094  
H 1.51520 0.33563 -2.58485  
H -0.96055 0.68302 -2.45933  
H 1.16397 -2.31217 -0.20518  
H -1.00638 -3.37585 0.41117  
H -3.12246 -0.42819 -1.87598  
H 1.86143 1.87577 0.83737  
H 0.21893 3.50151 -0.09933  
H -3.02462 1.06361 1.29357  
H -1.37448 -0.56988 2.26240

C 1.25059 -0.49896 2.15198  
O 0.95299 -1.12344 3.14671  
N -2.42917 3.27345 -0.06960  
O -1.97753 4.24653 -0.64548  
O -3.61153 3.00668 0.03461  
N -3.43489 -2.56761 -0.32177  
O -4.45526 -2.06469 -0.75659  
O -3.39043 -3.54306 0.40622

38

SCF Energy = -1398.65887353  
Enthalpy 0K = -1398.394263  
Enthalpy 298K = -1398.369841  
Free Energy 298K = -1398.452990  
Lowest Frequencies = 11.8263 cm-1

ASQ4\_c

C 5.83422 -1.23152 0.05436  
C 4.86649 -2.11107 0.52589  
C 3.54867 -1.68591 0.56861  
C 3.20613 -0.39475 0.14139  
C 4.19317 0.47644 -0.33254  
C 5.51515 0.05236 -0.37061  
N 1.85002 -0.03914 0.19239  
C 1.26632 1.16167 -0.03865  
C 1.68866 2.60390 -0.23353  
O 2.72010 3.20699 -0.31198  
C -0.06909 1.49351 -0.11660  
N -1.21481 0.73507 -0.09036  
C -3.61964 0.39491 0.22474  
C -3.75890 -0.44691 -0.88298  
C -4.92076 -1.19370 -1.05108  
C -5.92004 -1.07677 -0.09442  
C -5.81599 -0.23680 1.00803  
C -4.65342 0.50889 1.15875  
C 0.18096 2.93991 -0.34134  
O -0.46682 3.92040 -0.55968  
H -1.18631 -0.22658 -0.40754  
H 1.22982 -0.77859 0.50440  
H 3.94231 1.48154 -0.65043  
H 2.77975 -2.35872 0.93942  
H 5.15112 -3.10446 0.85162  
H 6.29819 0.71008 -0.72927  
H -2.98685 -0.49691 -1.64552  
H -5.06340 -1.84589 -1.90436  
H -6.63095 -0.17587 1.71944  
H -4.53141 1.18939 1.99514  
C -2.39988 1.23342 0.45645

O -2.41465 2.25835 1.09556  
N -7.15165 -1.87604 -0.26266  
O -7.21805 -2.60261 -1.23670  
O -8.01563 -1.75660 0.58484  
N 7.23198 -1.67507 0.00523  
O 7.47688 -2.80752 0.38475  
O 8.06024 -0.88567 -0.41231

37

SCF Energy = -1398.16704552  
Enthalpy OK = -1397.915617  
Enthalpy 298K = -1397.891609  
Free Energy 298K = -1397.973695  
Lowest Frequencies = 10.2474 cm-1  
ASQ4b\_a

C 5.59319 -1.19577 0.08306  
C 4.68407 -1.86491 0.90844  
C 3.38004 -1.41647 0.97128  
C 2.94581 -0.28401 0.23752  
C 3.89203 0.35588 -0.60296  
C 5.19867 -0.08899 -0.67395  
N 1.62091 0.05513 0.33275  
C 1.20870 1.26856 0.10489  
C 1.77770 2.69829 0.05071  
O 2.87464 3.19847 0.07241  
C -0.08746 1.83664 0.01991  
N -1.38384 1.35456 0.07144  
C -3.25631 -0.15344 -0.26912  
C -3.98388 0.32161 0.82687  
C -5.32048 -0.02890 0.98995  
C -5.90486 -0.85969 0.04199  
C -5.20304 -1.36046 -1.05033  
C -3.86875 -1.00440 -1.19472  
C 0.33017 3.20664 0.01676  
O -0.24285 4.28971 0.03260  
H -2.08320 2.05340 0.30019  
H 3.58573 1.21236 -1.19226  
H 2.64764 -1.92189 1.59256  
H 5.01462 -2.72507 1.47907  
H 5.92324 0.40571 -1.31045  
H -3.50306 0.94181 1.57716  
H -5.90255 0.32110 1.83394  
H -5.70076 -2.01205 -1.75846  
H -3.27318 -1.38094 -2.02000  
C -1.80347 0.17971 -0.50080  
O -1.08954 -0.55094 -1.15924  
N 6.95848 -1.66342 0.00413

O 7.28340 -2.63414 0.68207  
O 7.73764 -1.07247 -0.73665  
N -7.31904 -1.23192 0.20631  
O -7.81623 -1.95948 -0.63630  
O -7.91413 -0.79073 1.17495

37

SCF Energy = -1398.18034383  
Enthalpy OK = -1397.928301  
Enthalpy 298K = -1397.904849  
Free Energy 298K = -1397.982369  
Lowest Frequencies = 28.9357 cm-1  
ASQ4b\_b

C -2.01475 -1.98206 -0.72972  
C -0.80771 -2.51615 -0.27687  
C 0.37832 -1.88711 -0.61152  
C 0.38774 -0.70647 -1.40242  
C -0.85762 -0.23070 -1.88851  
C -2.04425 -0.84477 -1.54727  
N 1.52441 -0.04778 -1.77268  
C 2.59149 -0.08508 -1.01747  
C 4.02507 0.25240 -1.37405  
O 4.58529 0.64155 -2.36608  
C 2.99912 -0.29611 0.33030  
N 2.45912 -0.65106 1.55495  
C 0.25360 0.48580 1.48478  
C 0.67375 1.63857 0.81529  
C -0.26475 2.53479 0.31418  
C -1.61184 2.25243 0.49723  
C -2.05919 1.12410 1.17904  
C -1.11133 0.24778 1.68540  
C 4.40961 -0.10127 0.07138  
O 5.42291 -0.20385 0.74329  
H 3.10707 -1.12512 2.18133  
H -0.84773 0.65421 -2.51776  
H 1.32231 -2.30866 -0.27913  
H -0.81557 -3.40827 0.33948  
H -2.99870 -0.45906 -1.88852  
H 1.73009 1.84335 0.67891  
H 0.03542 3.42862 -0.21883  
H -3.12179 0.94190 1.28984  
H -1.41167 -0.64331 2.22721  
C 1.20955 -0.49139 2.10624  
O 0.90642 -1.09105 3.12881  
N -2.60806 3.18434 -0.05338  
O -2.20082 4.17154 -0.64356  
O -3.78712 2.91966 0.11127

N -3.25964 -2.61544 -0.34815  
O -4.30872 -2.12005 -0.74500  
O -3.21186 -3.61562 0.35953

37

SCF Energy = -1398.17191809  
Enthalpy 0K = -1397.920139  
Enthalpy 298K = -1397.896237  
Free Energy 298K = -1397.977822  
Lowest Frequencies = 16.7156 cm<sup>-1</sup>

ASQ4b\_c

C 5.33420 -1.52885 0.07268  
C 4.17390 -2.30748 0.12682  
C 2.94534 -1.67959 0.10967  
C 2.82556 -0.26730 0.03830  
C 4.02577 0.49059 -0.01443  
C 5.25923 -0.13451 0.00269  
N 1.55263 0.23730 0.02626  
C 1.28444 1.52634 -0.03305  
C 1.85537 2.93798 -0.10841  
O 2.94439 3.45912 -0.13353  
C -0.00970 2.07299 -0.05620  
N -1.13064 1.27241 -0.03787  
C -3.45034 0.56027 0.02335  
C -3.21011 -0.68403 -0.56958  
C -4.20498 -1.65623 -0.59374  
C -5.43390 -1.35845 -0.01794  
C -5.70701 -0.12682 0.56849  
C -4.70480 0.83416 0.57793  
C 0.40527 3.46518 -0.15645  
O -0.08135 4.57058 -0.25572  
H -0.88862 0.28418 0.01179  
H 3.97757 1.57361 -0.06779  
H 2.02822 -2.25881 0.15207  
H 4.25718 -3.38680 0.18167  
H 6.17479 0.44472 -0.03772  
H -2.25686 -0.89957 -1.04268  
H -4.04298 -2.62408 -1.05269  
H -6.68315 0.06108 0.99930  
H -4.87275 1.81628 1.00760  
C -2.43174 1.67382 0.07050  
O -2.77825 2.83239 0.20533  
N -6.49020 -2.38276 -0.03875  
O -6.23533 -3.45138 -0.56754  
O -7.56069 -2.10455 0.47457  
N 6.62536 -2.17611 0.08967  
O 6.66298 -3.40202 0.15173

O 7.63167 -1.47603 0.04136

37

SCF Energy = -1398.19283420  
Enthalpy 0K = -1397.940392  
Enthalpy 298K = -1397.916841  
Free Energy 298K = -1397.997058  
Lowest Frequencies = 9.5593 cm<sup>-1</sup>

ASQ4c\_a

C 5.49725 -1.25375 -0.00001  
C 4.39908 -2.11623 0.00001  
C 3.12646 -1.58161 0.00002  
C 2.92862 -0.18136 0.00001  
C 4.05147 0.67193 -0.00001  
C 5.32577 0.13133 -0.00002  
N 1.63275 0.26812 0.00002  
C 1.13129 1.53743 0.00001  
C 1.65867 2.92102 0.00001  
O 2.74669 3.46494 0.00001  
C -0.21514 1.96668 0.00001  
N -1.46406 1.48906 0.00001  
C -3.15972 -0.19497 0.00002  
C -4.15418 0.78973 -0.00002  
C -5.49743 0.43169 -0.00003  
C -5.82368 -0.92166 -0.00001  
C -4.85739 -1.92288 0.00002  
C -3.51956 -1.54641 0.00003  
C 0.20625 3.39371 0.00000  
O -0.35203 4.46472 -0.00000  
H 0.87191 -0.42538 0.00003  
H 3.91350 1.74882 -0.00002  
H 2.25956 -2.23652 0.00004  
H 4.55817 -3.18808 0.00002  
H 6.19714 0.77590 -0.00004  
H -3.84886 1.83025 -0.00003  
H -6.28504 1.17569 -0.00005  
H -5.15925 -2.96341 0.00004  
H -2.72871 -2.28889 0.00006  
C -1.69139 0.16786 0.00003  
O -0.87013 -0.77501 0.00005  
N 6.83587 -1.80994 -0.00002  
O 6.95583 -3.02981 -0.00001  
O 7.78556 -1.03691 -0.00004  
N -7.24071 -1.30860 -0.00002  
O -7.50914 -2.49989 0.00000  
O -8.07722 -0.41978 -0.00006

37  
SCF Energy = -1398.17197433  
Enthalpy 0K = -1397.920284  
Enthalpy 298K = -1397.896600  
Free Energy 298K = -1397.975292  
Lowest Frequencies = 16.9704 cm-1  
ASQ4c\_b  
C -2.37863 -1.95332 -0.58001  
C -1.24160 -2.46853 0.04068  
C 0.00488 -1.98115 -0.31216  
C 0.11652 -0.95477 -1.27101  
C -1.04650 -0.46751 -1.90338  
C -2.28931 -0.96188 -1.56029  
N 1.33806 -0.41845 -1.59510  
C 2.50967 -0.53148 -0.88186  
C 3.84421 -0.34339 -1.40292  
O 4.29533 -0.07459 -2.50614  
C 2.91685 -0.65738 0.47593  
N 2.45198 -0.83298 1.68494  
C 0.42368 0.60718 1.51791  
C 1.06353 1.69154 0.91123  
C 0.32115 2.73303 0.36137  
C -1.06545 2.66624 0.43140  
C -1.73309 1.61605 1.05689  
C -0.97379 0.59444 1.60958  
C 4.36200 -0.57234 0.02263  
O 5.43021 -0.63006 0.57644  
H 1.42492 0.06995 -2.48031  
H -0.96032 0.32899 -2.63764  
H 0.89632 -2.38190 0.15935  
H -1.33996 -3.23881 0.79693  
H -3.19290 -0.58204 -2.02248  
H 2.14721 1.72618 0.86786  
H 0.79816 3.58051 -0.11639  
H -2.81622 1.60781 1.09379  
H -1.44665 -0.24553 2.10869  
C 1.17527 -0.59211 2.09059  
O 0.60551 -1.25073 2.95433  
N -1.85548 3.75028 -0.16855  
O -1.25459 4.65804 -0.72147  
O -3.07116 3.68501 -0.08589  
N -3.68834 -2.46760 -0.21313  
O -4.66939 -1.99858 -0.77651  
O -3.74722 -3.34301 0.63844

37  
SCF Energy = -1398.17898596

Enthalpy 0K = -1397.927104  
Enthalpy 298K = -1397.903231  
Free Energy 298K = -1397.984505  
Lowest Frequencies = 14.8013 cm-1  
ASQ4c\_c  
C 5.61076 -1.33330 0.06307  
C 4.54683 -2.20832 0.28604  
C 3.25910 -1.70917 0.29955  
C 3.01761 -0.33375 0.09122  
C 4.10567 0.53542 -0.13142  
C 5.39383 0.03020 -0.14397  
N 1.72270 0.11752 0.11145  
C 1.23829 1.38949 -0.06381  
C 1.69114 2.75803 -0.30378  
O 2.74751 3.34965 -0.44444  
C -0.12263 1.71616 -0.02384  
N -1.14259 0.88268 0.11530  
C -3.51369 0.44873 0.25911  
C -3.34037 -0.82716 -0.28671  
C -4.42860 -1.67580 -0.45817  
C -5.68786 -1.22236 -0.07720  
C -5.89316 0.04334 0.46483  
C -4.79285 0.87587 0.62878  
C 0.20338 3.15898 -0.33994  
O -0.38757 4.17363 -0.59846  
H 0.98364 -0.56213 0.27504  
H 3.92842 1.59688 -0.28840  
H 2.42062 -2.37840 0.47257  
H 4.74283 -3.26215 0.44478  
H 6.24076 0.68498 -0.31328  
H -2.34151 -1.13708 -0.57225  
H -4.31857 -2.66847 -0.87823  
H -6.89277 0.35365 0.74494  
H -4.89696 1.87290 1.04437  
C -2.35346 1.40725 0.45361  
O -2.57957 2.51638 0.92897  
N -6.84252 -2.11262 -0.25302  
O -6.64502 -3.22079 -0.72603  
O -7.94097 -1.69942 0.08344  
N 6.96438 -1.85425 0.04772  
O 7.12364 -3.05509 0.23347  
O 7.88395 -1.07124 -0.14996

37  
SCF Energy = -1398.17641327  
Enthalpy 0K = -1397.924450  
Enthalpy 298K = -1397.900579

Free Energy 298K = -1397.981569  
Lowest Frequencies = 15.4986 cm-1

ASQ4c\_d

C 3.68699 -2.44085 0.12054  
C 2.38947 -1.93307 0.20453  
C 2.16974 -0.57183 0.08384  
C 3.26161 0.29495 -0.12224  
C 4.56609 -0.23944 -0.20376  
C 4.78033 -1.59857 -0.08403  
N 3.10475 1.65377 -0.24682  
C 1.98183 2.44137 -0.19838  
C 2.03051 3.88339 -0.33641  
O 2.94964 4.67127 -0.49026  
C 0.58574 2.37491 -0.04124  
N -0.29613 1.39497 0.07323  
C -2.58097 0.66989 0.34182  
C -3.84639 0.86772 0.90264  
C -4.87608 -0.03401 0.66396  
C -4.61394 -1.13569 -0.14569  
C -3.36615 -1.36065 -0.71927  
C -2.34933 -0.44504 -0.47027  
C 0.49983 3.88113 -0.26136  
O -0.38254 4.67981 -0.43107  
H 3.94965 2.20176 -0.38505  
H 5.40848 0.42873 -0.36242  
H 1.16266 -0.16411 0.14455  
H 1.56070 -2.61301 0.36606  
H 5.77741 -2.01830 -0.14510  
H -3.99664 1.74425 1.52447  
H -5.86437 0.10035 1.08721  
H -3.20940 -2.23219 -1.34367  
H -1.36362 -0.57936 -0.90268  
C -1.50152 1.69632 0.62796  
O -1.76606 2.64510 1.36214  
N 3.90858 -3.86944 0.24624  
O 2.93741 -4.59219 0.42250  
O 5.05929 -4.28416 0.16952  
N -5.69482 -2.09556 -0.40489  
O -6.78125 -1.88828 0.11266  
O -5.45250 -3.05124 -1.12469

37

SCF Energy = -1398.17935579  
Enthalpy 0K = -1397.927383  
Enthalpy 298K = -1397.903661  
Free Energy 298K = -1397.983680  
Lowest Frequencies = 10.6161 cm-1

ASQ4c\_e

C 0.63206 3.32932 -0.32012  
C 1.65569 3.52720 0.60690  
C 2.52914 2.49089 0.87490  
C 2.39269 1.24953 0.22270  
C 1.36745 1.08074 -0.73052  
C 0.48480 2.11289 -0.98888  
N 3.29926 0.24984 0.49086  
C 3.22857 -1.06120 0.10646  
C 4.34939 -1.96098 -0.13228  
O 5.55625 -1.86586 -0.00319  
C 2.24479 -2.03347 -0.16109  
N 0.92406 -2.15458 -0.15445  
C -1.24599 -1.33449 0.49319  
C -2.01502 -0.43425 1.23685  
C -3.39210 -0.36762 1.06119  
C -3.97991 -1.22127 0.13217  
C -3.24090 -2.12654 -0.62420  
C -1.86363 -2.17447 -0.43973  
C 3.31357 -3.01618 -0.55723  
O 3.33244 -4.13048 -1.01734  
H 4.18891 0.52602 0.89239  
H 1.26746 0.13670 -1.25582  
H 3.31533 2.61994 1.61339  
H 1.74560 4.48286 1.10961  
H -0.31444 1.99248 -1.71103  
H -1.50706 0.20636 1.95068  
H -4.00806 0.32504 1.62214  
H -3.74407 -2.77086 -1.33524  
H -1.24447 -2.86147 -1.00639  
C 0.25044 -1.35773 0.71195  
O 0.72811 -0.70173 1.64448  
N -0.28422 4.41804 -0.60596  
O -0.12913 5.47569 -0.00662  
O -1.16586 4.23068 -1.43310  
N -5.43580 -1.16737 -0.05496  
O -5.93496 -1.91277 -0.88338  
O -6.07292 -0.38214 0.62894

34

SCF Energy = -1011.35181941  
Enthalpy 0K = -1011.113446  
Enthalpy 298K = -1011.091203  
Free Energy 298K = -1011.169817  
Lowest Frequencies = 12.6382 cm-1

ASQ5\_a

C 5.86685 -0.33135 0.78240

C 4.87198 -1.27351 0.53403  
C 3.55216 -0.86390 0.36079  
C 3.20906 0.49326 0.45116  
C 4.21336 1.42661 0.72821  
C 5.53296 1.01811 0.87565  
N 1.86647 0.89094 0.30515  
C 1.42488 2.05546 -0.18107  
C 2.06724 3.25030 -0.86439  
O 3.18074 3.56493 -1.17771  
C 0.16363 2.61335 -0.34513  
N -1.14832 2.29335 -0.09298  
C -3.06978 1.02958 0.65878  
C -3.73707 2.10606 1.25709  
C -5.10541 2.05290 1.49955  
C -5.82196 0.91754 1.13059  
C -5.17381 -0.15749 0.52536  
C -3.79913 -0.10988 0.29543  
C 0.64865 3.82940 -0.99510  
O 0.11459 4.81347 -1.44616  
H -1.83263 2.95360 -0.44997  
H 1.13242 0.24090 0.59070  
H 3.95434 2.47450 0.82221  
H 5.12093 -2.32705 0.46296  
H 6.29852 1.76008 1.07768  
H -3.16755 2.98039 1.56229  
H -5.60503 2.89008 1.97563  
H -5.73881 -1.03459 0.22867  
C -1.58612 1.12026 0.47984  
O -0.81471 0.24486 0.83025  
H -6.89129 0.86224 1.30956  
H 6.89497 -0.65575 0.90610  
I 2.07887 -2.32331 -0.04617  
I -2.92005 -1.76123 -0.68556

33

SCF Energy = -1010.82338740  
Enthalpy 0K = -1010.599320  
Enthalpy 298K = -1010.577367  
Free Energy 298K = -1010.653242  
Lowest Frequencies = 15.1570 cm<sup>-1</sup>

ASQ5b\_b

C 2.89667 3.09255 0.51135  
C 3.15255 1.86800 -0.09794  
C 2.48309 0.71424 0.31636  
C 1.50084 0.74730 1.33457  
C 1.30040 2.00345 1.95619  
C 1.97319 3.14564 1.55952

N 0.83832 -0.33167 1.87355  
C 0.20536 -1.22752 1.18406  
C -0.37796 -2.53571 1.69181  
O -0.45273 -3.06298 2.77341  
C -0.30583 -1.54851 -0.11167  
N -0.30374 -1.04109 -1.40857  
C -0.92935 1.32181 -0.98567  
C -2.04823 1.32239 -0.14596  
C -2.37187 2.46063 0.59763  
C -1.60296 3.61385 0.47989  
C -0.51680 3.64198 -0.39313  
C -0.18921 2.50430 -1.11518  
C -0.80817 -2.84469 0.25487  
O -1.33257 -3.77110 -0.35124  
H -0.21257 -1.74546 -2.13756  
H 0.57487 2.03029 2.76411  
H 3.89447 1.79776 -0.88787  
H 1.76974 4.08888 2.06131  
H -3.23878 2.44692 1.24987  
H 0.08672 4.53876 -0.49529  
H 0.65727 2.50219 -1.79520  
C -0.52241 0.20516 -1.91115  
O -0.38307 0.43761 -3.10715  
H -1.86379 4.49180 1.06458  
H 3.42910 3.98208 0.18693  
I 3.15927 -1.12299 -0.49916  
I -3.43339 -0.27816 -0.07705

33

SCF Energy = -1010.83920678  
Enthalpy 0K = -1010.614631  
Enthalpy 298K = -1010.592752  
Free Energy 298K = -1010.670550  
Lowest Frequencies = 9.6644 cm<sup>-1</sup>

ASQ5c\_a

C -5.53214 -0.97054 0.72747  
C -4.43250 -1.71036 0.30187  
C -3.21722 -1.08355 0.03917  
C -3.05804 0.31017 0.19770  
C -4.18201 1.03899 0.63405  
C -5.39159 0.40809 0.88639  
N -1.83930 0.91893 -0.04065  
C -1.53055 2.25003 -0.03189  
C -2.26037 3.53695 -0.04383  
O -3.41982 3.91424 -0.06364  
C -0.26470 2.88662 -0.06216  
N 1.03913 2.60558 -0.05574

C 2.95506 1.17704 -0.16049  
C 3.76704 2.31026 -0.32853  
C 5.15319 2.23144 -0.28059  
C 5.76615 1.00282 -0.04069  
C 4.98405 -0.13153 0.15396  
C 3.59051 -0.04589 0.08833  
C -0.90402 4.22693 -0.03174  
O -0.51913 5.37479 -0.02225  
H -1.01794 0.34245 -0.25782  
H -4.10237 2.11490 0.73960  
H -4.51386 -2.78443 0.16875  
H -6.23481 1.00998 1.21344  
H 3.26106 3.25534 -0.49412  
H 5.75182 3.12634 -0.42458  
H 5.45394 -1.08752 0.36064  
C 1.45442 1.35025 -0.29698  
O 0.77594 0.37454 -0.66461  
H -6.47714 -1.46577 0.92816  
H 6.84890 0.92166 0.00427  
I -1.60373 -2.29479 -0.60438  
I 2.55754 -1.85878 0.48982

33

SCF Energy = -1010.83573696  
Enthalpy OK = -1010.611189  
Enthalpy 298K = -1010.589281  
Free Energy 298K = -1010.668349  
Lowest Frequencies = 4.8359 cm-1

ASQ5c\_b

C -5.77225 0.84355 1.11094  
C -5.13015 -0.37091 0.88791  
C -3.82519 -0.40227 0.40247  
C -3.11380 0.78417 0.12137  
C -3.78144 2.00222 0.35906  
C -5.08280 2.02527 0.83888  
N -1.81160 0.74374 -0.34120  
C -1.00040 1.78204 -0.70855  
C -1.13648 3.22171 -1.02141  
O -2.02656 4.05346 -1.07414  
C 0.39072 1.78292 -0.97283  
N 1.44343 0.96390 -0.94140  
C 2.52228 -1.18003 -0.75871  
C 3.64827 -0.84916 0.00447  
C 4.76436 -1.69090 0.03279  
C 4.77528 -2.87002 -0.70636  
C 3.65620 -3.22559 -1.45750  
C 2.54588 -2.39085 -1.46591

C 0.36685 3.23958 -1.26594  
O 1.17693 4.08145 -1.57950  
H -1.34678 -0.16231 -0.47233  
H -3.27491 2.93294 0.12876  
H -5.64214 -1.30605 1.09173  
H -5.56114 2.98731 0.99995  
H 5.62300 -1.42217 0.63942  
H 3.64750 -4.14947 -2.02891  
C 1.25436 -0.36074 -0.90436  
O 0.19232 -0.99497 -1.06920  
H -6.78974 0.86051 1.48903  
H 5.65341 -3.50970 -0.68243  
I -2.93829 -2.30315 0.11061  
H 1.65176 -2.65110 -2.02389  
I 3.75686 0.85600 1.25999

34

SCF Energy = -1011.35875905  
Enthalpy OK = -1011.120108  
Enthalpy 298K = -1011.097835  
Free Energy 298K = -1011.177364  
Lowest Frequencies = 12.4726 cm-1

ASQ6\_a

C -5.66813 -0.72210 -0.02572  
C -4.59274 -1.60723 0.01346  
C -3.29602 -1.10810 0.03814  
C -3.06484 0.27219 0.02318  
C -4.14548 1.15560 -0.01691  
C -5.44423 0.65248 -0.04042  
N -1.72031 0.68577 0.04617  
C -1.18572 1.91231 0.06067  
C -1.67502 3.35545 0.06638  
O -2.73485 3.91689 0.05713  
C 0.13574 2.34869 0.07780  
N 1.40612 1.82561 0.07419  
C 3.18543 0.16029 0.04646  
C 4.15075 1.02833 -0.47282  
C 5.49046 0.65174 -0.50613  
C 5.86163 -0.59895 -0.01394  
C 4.90749 -1.47912 0.49813  
C 3.57103 -1.09731 0.51875  
C -0.19748 3.76768 0.08314  
O 0.45190 4.78564 0.09561  
H 2.14389 2.52044 0.12668  
H -1.01756 -0.05386 0.07784  
H -3.98797 2.22815 -0.02755  
H -2.45577 -1.79730 0.06875



H -4.75717 -2.67934 0.02498  
H -6.27815 1.34578 -0.07069  
H 3.87691 1.99198 -0.89395  
H 6.23326 1.32523 -0.91951  
H 5.20195 -2.45268 0.87499  
H 2.80999 -1.76903 0.90285  
C 1.73234 0.49048 0.10325  
O 0.87237 -0.37684 0.18489  
I 7.88815 -1.17174 -0.05682  
I -7.64054 -1.46862 -0.06447

33

SCF Energy = -1010.84327446  
Enthalpy 0K = -1010.618588  
Enthalpy 298K = -1010.596879  
Free Energy 298K = -1010.672269  
Lowest Frequencies = 19.2860 cm<sup>-1</sup>

ASQ6\_b

C -1.23887 -1.98976 -0.73256  
C -0.04283 -2.59750 -0.36292  
C 1.16525 -1.99978 -0.71315  
C 1.20275 -0.78204 -1.42642  
C -0.02903 -0.22523 -1.82836  
C -1.23785 -0.80925 -1.47815  
N 2.37045 -0.14975 -1.80643  
C 3.42387 -0.22028 -1.04763  
C 4.86254 0.13376 -1.37287  
O 5.42857 0.58691 -2.33642  
C 3.83813 -0.51681 0.29138  
N 3.29265 -0.95502 1.48980  
C 1.13347 0.26292 1.53438  
C 1.57685 1.43544 0.91852  
C 0.66009 2.38782 0.47655  
C -0.69877 2.15224 0.65827  
C -1.16015 1.00642 1.30345  
C -0.23454 0.07075 1.74872  
C 5.24224 -0.31317 0.04500  
O 6.26279 -0.46041 0.70563  
H 3.92659 -1.50145 2.06911  
H -0.00872 0.70070 -2.39669  
H 2.09876 -2.48197 -0.43578  
H -0.04301 -3.52063 0.20894  
H -2.17233 -0.33545 -1.76559  
H 2.63680 1.61428 0.76999  
H 1.00892 3.28654 -0.02051  
H -2.22290 0.82899 1.43439  
H -0.56367 -0.83569 2.24782

C 2.05698 -0.79105 2.06678  
O 1.74013 -1.46662 3.03996  
I -2.10384 3.53953 -0.10483  
I -3.08248 -2.83251 -0.11506

33

SCF Energy = -1010.85401209  
Enthalpy 0K = -1010.629086  
Enthalpy 298K = -1010.608089  
Free Energy 298K = -1010.682814  
Lowest Frequencies = -3.3875 cm<sup>-1</sup>

ASQ6c\_a

C 5.58980 -0.72174 -0.00034  
C 5.37786 0.65492 -0.00233  
C 4.08415 1.16858 -0.00117  
C 2.98275 0.29767 0.00202  
C 3.21541 -1.09004 0.00405  
C 4.50750 -1.59920 0.00285  
N 1.66700 0.72262 0.00316  
C 1.14354 1.97756 0.00183  
C 1.64305 3.37012 0.00016  
O 2.72356 3.93497 -0.00056  
C -0.21216 2.38729 0.00151  
N -1.45290 1.88719 0.00171  
C -3.12179 0.17613 0.00377  
C -4.13360 1.14003 -0.00238  
C -5.47478 0.76119 -0.00426  
C -5.79408 -0.59506 0.00021  
C -4.80334 -1.57378 0.00657  
C -3.46734 -1.17672 0.00824  
C 0.18677 3.81703 -0.00041  
O -0.38783 4.88265 -0.00182  
H 0.92285 0.01307 0.00593  
H 2.36728 -1.77011 0.00653  
H 3.92713 2.24356 -0.00256  
H 6.21844 1.34173 -0.00477  
H 4.66355 -2.67320 0.00439  
H -3.84810 2.18692 -0.00567  
H -6.25710 1.51313 -0.00915  
H -5.06519 -2.62698 0.01017  
H -2.66861 -1.91190 0.01305  
C -1.66115 0.56190 0.00549  
O -0.82319 -0.36760 0.01043  
I 7.56372 -1.48862 -0.00227  
I -7.83230 -1.18158 -0.00284

34

SCF Energy = -2828.07421355  
Enthalpy OK = -2827.852776  
Enthalpy 298K = -2827.828986  
Free Energy 298K = -2827.909957  
Lowest Frequencies = 13.8793 cm<sup>-1</sup>

ASQ7\_a

C -5.65613 -0.83712 -0.07668  
C -4.55100 -1.69082 -0.09313  
C -3.26388 -1.16681 -0.06058  
C -3.06515 0.21525 -0.01222  
C -4.16531 1.07610 0.00248  
C -5.44606 0.53944 -0.02858  
N -1.73002 0.65425 0.01333  
C -1.22498 1.89185 0.09459  
C -1.75032 3.31887 0.20135  
O -2.82357 3.85144 0.24734  
C 0.08458 2.35974 0.11502  
N 1.36750 1.87174 0.05450  
C 3.18560 0.25914 -0.11298  
C 4.12187 1.18374 -0.58544  
C 5.46343 0.83364 -0.66023  
C 5.88283 -0.43564 -0.26307  
C 4.94482 -1.36660 0.20010  
C 3.60099 -1.01712 0.26599  
C -0.28286 3.76746 0.21682  
O 0.34196 4.79784 0.28202  
H 2.08849 2.58106 0.13846  
H -1.01012 -0.06897 -0.01254  
H -4.03439 2.15103 0.04218  
H -2.41788 -1.84776 -0.07276  
H -6.30661 1.19997 -0.01603  
H 3.82357 2.16742 -0.93576  
H 6.19911 1.53729 -1.03412  
H 2.86779 -1.73720 0.61405  
C 1.72508 0.54668 -0.00735  
O 0.88997 -0.34626 0.03483  
Cl -7.27406 -1.45159 -0.11327  
Cl 7.55940 -0.83166 -0.36273  
Cl -4.74423 -3.41052 -0.15238  
Cl 5.42594 -2.95068 0.69377

34

SCF Energy = -2828.07335837  
Enthalpy OK = -2827.852008  
Enthalpy 298K = -2827.829130  
Free Energy 298K = -2827.906432  
Lowest Frequencies = -2.2135 cm<sup>-1</sup>

ASQ7\_b

C -5.60317 -1.52816 0.16089  
C -5.38576 -0.15009 0.09506  
C -4.09468 0.36859 0.02142  
C -3.00581 -0.50175 0.01270  
C -3.21728 -1.88414 0.07970  
C -4.50628 -2.38788 0.15317  
N -1.67017 -0.07000 -0.05837  
C -1.15607 1.16301 -0.15424  
C -1.67421 2.59443 -0.22824  
O -2.74491 3.13315 -0.22392  
C 0.15499 1.61977 -0.22758  
N 1.43536 1.11975 -0.22700  
C 3.24157 -0.51731 -0.16067  
C 3.63606 -1.78804 -0.58771  
C 4.97830 -2.13607 -0.58349  
C 5.93955 -1.22663 -0.13967  
C 5.54644 0.03952 0.30685  
C 4.19877 0.39003 0.29438  
C -0.20461 3.03182 -0.30519  
O 0.42524 4.05701 -0.39224  
H 2.15828 1.82328 -0.34029  
H -0.95741 -0.80041 -0.06516  
H -2.37088 -2.56524 0.07408  
H -3.96199 1.44362 -0.03063  
H -4.67447 -3.45825 0.20480  
H 2.88038 -2.49083 -0.92171  
H 5.29970 -3.11516 -0.92192  
H 3.92791 1.36698 0.68366  
C 1.78177 -0.20875 -0.19312  
O 0.93680 -1.09379 -0.20414  
Cl -7.19942 -2.19248 0.24928  
Cl 7.60081 -1.69290 -0.14499  
Cl -6.71387 0.95960 0.10237  
Cl 6.70233 1.18499 0.88813

34

SCF Energy = -2828.07362377  
Enthalpy OK = -2827.852341  
Enthalpy 298K = -2827.828507  
Free Energy 298K = -2827.910486  
Lowest Frequencies = 6.3685 cm<sup>-1</sup>

ASQ7\_c

C 5.34834 -1.77323 -0.12528  
C 5.28562 -0.38037 -0.04345  
C 4.05941 0.27978 0.00268  
C 2.87990 -0.46215 -0.03242

C 2.93622 -1.85873 -0.11300  
C 4.16198 -2.50366 -0.15928  
N 1.59966 0.11696 0.00473  
C 1.22475 1.39905 0.09777  
C 1.89712 2.76214 0.21198  
O 3.02092 3.17656 0.25634  
C -0.02853 2.00045 0.12744  
N -1.35587 1.64917 0.06890  
C -3.33204 0.23549 -0.10880  
C -4.16994 1.25661 -0.56705  
C -5.54026 1.04573 -0.64338  
C -6.08637 -0.17960 -0.26252  
C -5.24741 -1.20691 0.18664  
C -3.87512 -0.99650 0.25476  
C 0.48408 3.36164 0.23767  
O -0.03030 4.45060 0.31300  
H -1.99854 2.42918 0.16098  
H 0.80932 -0.52810 -0.02598  
H 2.01888 -2.44013 -0.14040  
H 4.04708 1.36223 0.06753  
H 4.21016 -3.58540 -0.22271  
H -3.77375 2.20947 -0.90533  
H -6.20082 1.82556 -1.00629  
H -3.21879 -1.79169 0.59242  
C -1.84925 0.36965 -0.00475  
O -1.11148 -0.60604 0.02538  
Cl 6.86135 -2.61208 -0.18810  
Cl -7.79432 -0.40254 -0.36464  
Cl 6.72932 0.57293 0.00260  
Cl -5.88602 -2.74120 0.65911

34

SCF Energy = -2828.06314744  
Enthalpy 0K = -2827.842489  
Enthalpy 298K = -2827.818827  
Free Energy 298K = -2827.896943  
Lowest Frequencies = 20.1537 cm<sup>-1</sup>  
ASQ7\_d  
C 3.27964 0.50458 -0.92097  
C 2.49587 1.13702 0.04698  
C 1.11127 1.19375 -0.09309  
C 0.50701 0.62458 -1.21090  
C 1.28639 -0.00117 -2.18724  
C 2.66376 -0.06128 -2.03635  
N -0.89915 0.57983 -1.34421  
C -1.77595 1.35648 -0.67500  
C -1.72160 2.79235 -0.22185

O -0.88278 3.64672 -0.19993  
C -3.08604 1.21434 -0.24414  
N -4.05540 0.24466 -0.20673  
C -2.52900 -1.65632 -0.03085  
C -1.97213 -2.56915 -0.92850  
C -0.63900 -2.94407 -0.78953  
C 0.12809 -2.43811 0.26113  
C -0.45908 -1.59156 1.21021  
C -1.78339 -1.19494 1.05325  
C -3.20239 2.62217 0.19302  
O -4.09798 3.29660 0.62530  
H -5.01924 0.57048 -0.16837  
H -1.25761 -0.28334 -1.73814  
H 0.81311 -0.43849 -3.06190  
H 0.52350 1.66487 0.68710  
H 3.27806 -0.55006 -2.78488  
H -2.57609 -2.95828 -1.74309  
H -0.17474 -3.62264 -1.49762  
H -2.21605 -0.50557 1.77286  
C -3.91102 -1.14089 -0.28221  
O -4.85646 -1.85383 -0.53452  
Cl 4.99840 0.39229 -0.75842  
Cl 1.80000 -2.85027 0.35746  
Cl 3.20644 1.82731 1.46307  
Cl 0.44541 -0.98410 2.54966

34

SCF Energy = -2828.06384899  
Enthalpy 0K = -2827.842980  
Enthalpy 298K = -2827.819248  
Free Energy 298K = -2827.898693  
Lowest Frequencies = 12.2079 cm<sup>-1</sup>  
ASQ7\_e  
C 3.18786 1.49062 -0.01652  
C 2.80912 0.49615 -0.92109  
C 1.46582 0.30447 -1.22332  
C 0.48606 1.09416 -0.61887  
C 0.85678 2.08808 0.28918  
C 2.20278 2.28041 0.57258  
N -0.85700 0.79192 -0.92296  
C -1.96660 1.40720 -0.45872  
C -2.29624 2.83304 -0.08313  
O -1.68733 3.86044 0.01859  
C -3.28264 1.00545 -0.26443  
N -4.07509 -0.10539 -0.36918  
C -2.34088 -1.83546 -0.17333  
C -1.65341 -2.69598 -1.03301

C -0.32278 -3.00601 -0.77733  
C 0.32027 -2.47776 0.34446  
C -0.38618 -1.65723 1.23250  
C -1.71726 -1.34295 0.97224  
C -3.75149 2.35945 0.08609  
O -4.82927 2.83253 0.33132  
H -5.07471 0.08170 -0.43615  
H -0.99458 -0.12804 -1.32784  
H 0.11558 2.71758 0.76499  
H 1.19179 -0.47286 -1.93191  
H 2.50075 3.05175 1.27470  
H -2.16180 -3.10245 -1.90196  
H 0.23705 -3.65134 -1.44621  
H -2.24642 -0.68697 1.65777  
C -3.74124 -1.45091 -0.52333  
O -4.56455 -2.24588 -0.91975  
Cl 4.84890 1.75934 0.38606  
Cl 1.98899 -2.82944 0.59450  
Cl 3.98193 -0.51984 -1.68666  
Cl 0.37937 -0.97172 2.61941

34

SCF Energy = -2828.06374495  
Enthalpy 0K = -2827.842979  
Enthalpy 298K = -2827.819252  
Free Energy 298K = -2827.898424  
Lowest Frequencies = 12.7787 cm<sup>-1</sup>

ASQ7\_f

C -2.99612 -1.78686 0.06196  
C -2.69477 -0.72104 -0.78969  
C -1.37163 -0.43315 -1.10307  
C -0.33589 -1.19137 -0.55326  
C -0.62811 -2.25821 0.29857  
C -1.95572 -2.54939 0.58850  
N 0.97976 -0.78061 -0.84476  
C 2.13760 -1.35064 -0.45089  
C 2.58146 -2.76695 -0.17319  
O 2.04836 -3.83775 -0.09416  
C 3.42643 -0.86447 -0.26924  
N 4.09538 0.33064 -0.31903  
C 2.21538 1.75299 0.33003  
C 1.84706 1.07999 1.49766  
C 0.53411 1.13960 1.94364  
C -0.42400 1.84792 1.21606  
C -0.04601 2.55317 0.06688  
C 1.28096 2.52218 -0.36130  
C 4.00851 -2.19892 -0.03439

O 5.12423 -2.61315 0.13583  
H 5.09625 0.27463 -0.49890  
H 1.04830 0.17442 -1.17878  
H 0.16048 -2.86911 0.72096  
H -1.15903 0.39942 -1.76925  
H -2.19498 -3.37861 1.24581  
H 2.57984 0.49712 2.04843  
H 0.22669 0.61437 2.84178  
H 1.57732 3.07411 -1.24881  
C 3.59404 1.63058 -0.23673  
O 4.25645 2.57608 -0.60068  
Cl -4.63046 -2.17179 0.48115  
Cl -2.06595 1.81340 1.74013  
Cl -3.93912 0.27437 -1.46107  
Cl -1.20758 3.43281 -0.86207

34

SCF Energy = -2828.06269274  
Enthalpy 0K = -2827.842132  
Enthalpy 298K = -2827.818365  
Free Energy 298K = -2827.898031  
Lowest Frequencies = 11.0076 cm<sup>-1</sup>

ASQ7\_g

C 3.33623 -0.52342 -0.63711  
C 2.59771 -1.49000 0.04950  
C 1.21314 -1.56243 -0.09340  
C 0.56393 -0.66948 -0.94268  
C 1.29866 0.29506 -1.64006  
C 2.67363 0.36673 -1.48096  
N -0.83864 -0.64151 -1.07371  
C -1.73045 -1.52774 -0.58486  
C -1.70918 -3.01895 -0.35760  
O -0.88188 -3.88350 -0.41683  
C -3.06642 -1.44233 -0.21848  
N -4.03711 -0.48136 -0.09916  
C -2.53544 1.36122 0.46845  
C -1.86291 0.75032 1.52992  
C -0.56505 1.13315 1.83714  
C 0.07943 2.10802 1.07331  
C -0.60777 2.74570 0.03386  
C -1.92506 2.38625 -0.25150  
C -3.21014 -2.89707 -0.01192  
O -4.12930 -3.62315 0.25719  
H -5.00056 -0.80231 -0.17386  
H -1.20906 0.26173 -1.34723  
H 0.79310 0.99577 -2.30000  
H 0.66711 -2.32075 0.45554

H 3.24747 1.12131 -2.00835  
H -2.34571 -0.03448 2.10523  
H -0.02290 0.66192 2.65036  
H -2.46216 2.88617 -1.05263  
C -3.89308 0.89980 0.04099  
O -4.82153 1.64750 -0.16914  
Cl 5.05176 -0.39536 -0.45268  
Cl 1.72473 2.48758 1.42265  
Cl 3.37049 -2.60955 1.11807  
Cl 0.15780 3.95703 -0.93370

34

SCF Energy = -2828.07421355  
Enthalpy OK = -2827.852776  
Enthalpy 298K = -2827.828986  
Free Energy 298K = -2827.909957  
Lowest Frequencies = 13.8782 cm-1

ASQ7\_dd

C -5.65611 -0.83714 -0.07667  
C -4.55098 -1.69082 -0.09313  
C -3.26387 -1.16681 -0.06059  
C -3.06515 0.21526 -0.01222  
C -4.16531 1.07609 0.00249  
C -5.44606 0.53943 -0.02857  
N -1.73002 0.65427 0.01332  
C -1.22498 1.89186 0.09459  
C -1.75033 3.31888 0.20135  
O -2.82357 3.85145 0.24733  
C 0.08458 2.35976 0.11502  
N 1.36750 1.87176 0.05450  
C 3.18559 0.25915 -0.11297  
C 4.12188 1.18374 -0.58543  
C 5.46343 0.83364 -0.66022  
C 5.88282 -0.43564 -0.26306  
C 4.94481 -1.36660 0.20010  
C 3.60097 -1.01711 0.26599  
C -0.28287 3.76747 0.21682  
O 0.34195 4.79785 0.28202  
H 2.08849 2.58108 0.13845  
H -1.01012 -0.06896 -0.01256  
H -4.03440 2.15102 0.04219  
H -2.41786 -1.84775 -0.07278  
H -6.30662 1.19995 -0.01601  
H 3.82359 2.16743 -0.93575  
H 6.19912 1.53728 -1.03411  
H 2.86777 -1.73718 0.61404  
C 1.72508 0.54670 -0.00735

O 0.88996 -0.34624 0.03484  
Cl -7.27405 -1.45162 -0.11325  
Cl 7.55939 -0.83168 -0.36273  
Cl -4.74420 -3.41053 -0.15239  
Cl 5.42591 -2.95069 0.69376

34

SCF Energy = -2828.07400212  
Enthalpy OK = -2827.852543  
Enthalpy 298K = -2827.828745  
Free Energy 298K = -2827.910040  
Lowest Frequencies = 8.5873 cm-1

ASQ7\_du

C -5.83941 -0.52604 -0.16517  
C -4.84372 -1.50250 -0.09259  
C -3.50676 -1.13131 -0.00890  
C -3.14819 0.21901 0.00224  
C -4.13816 1.20198 -0.07129  
C -5.47040 0.81750 -0.15243  
N -1.77330 0.50011 0.08114  
C -1.12993 1.67253 0.15557  
C -1.48927 3.15278 0.20780  
O -2.49427 3.80655 0.19490  
C 0.22327 1.98577 0.22364  
N 1.44167 1.35025 0.23025  
C 3.05985 -0.47314 0.18741  
C 3.32209 -1.76663 0.64655  
C 4.61958 -2.25585 0.63831  
C 5.66608 -1.46688 0.15803  
C 5.40417 -0.17883 -0.32087  
C 4.10188 0.31398 -0.30382  
C 0.01859 3.42927 0.27923  
O 0.75520 4.38199 0.35190  
H 2.23718 1.97307 0.32860  
H -1.14342 -0.30246 0.10937  
H -3.88295 2.25502 -0.06067  
H -2.74778 -1.90612 0.04783  
H -6.24615 1.57387 -0.20875  
H 2.50046 -2.37549 1.00827  
H 4.83939 -3.25399 1.00142  
H 3.93051 1.30286 -0.71855  
C 1.64223 -0.00894 0.22388  
O 0.70685 -0.79659 0.26083  
Cl -7.51473 -0.94908 -0.27063  
Cl 7.26841 -2.10790 0.15916  
Cl -5.23623 -3.18910 -0.10366  
Cl 6.66728 0.81955 -0.94922

34  
SCF Energy = -2828.07362377  
Enthalpy OK = -2827.852341  
Enthalpy 298K = -2827.828507  
Free Energy 298K = -2827.910486  
Lowest Frequencies = 6.3714 cm-1  
ASQ7\_ud  
C 5.34834 -1.77323 -0.12528  
C 5.28562 -0.38037 -0.04345  
C 4.05941 0.27978 0.00268  
C 2.87990 -0.46215 -0.03242  
C 2.93622 -1.85873 -0.11300  
C 4.16198 -2.50366 -0.15928  
N 1.59966 0.11696 0.00473  
C 1.22475 1.39905 0.09777  
C 1.89712 2.76214 0.21198  
O 3.02092 3.17656 0.25634  
C -0.02853 2.00045 0.12744  
N -1.35587 1.64917 0.06890  
C -3.33204 0.23549 -0.10880  
C -4.16994 1.25661 -0.56705  
C -5.54026 1.04573 -0.64338  
C -6.08637 -0.17960 -0.26252  
C -5.24741 -1.20691 0.18664  
C -3.87512 -0.99650 0.25476  
C 0.48408 3.36164 0.23767  
O -0.03030 4.45060 0.31300  
H -1.99854 2.42918 0.16098  
H 0.80932 -0.52810 -0.02598  
H 2.01888 -2.44013 -0.14040  
H 4.04708 1.36223 0.06753  
H 4.21016 -3.58540 -0.22271  
H -3.77375 2.20947 -0.90533  
H -6.20082 1.82556 -1.00629  
H -3.21879 -1.79169 0.59242  
C -1.84925 0.36965 -0.00475  
O -1.11148 -0.60604 0.02538  
Cl 6.86135 -2.61208 -0.18810  
Cl -7.79432 -0.40254 -0.36464  
Cl 6.72932 0.57293 0.00260  
Cl -5.88602 -2.74120 0.65911

34  
SCF Energy = -2828.07335837  
Enthalpy OK = -2827.852008  
Enthalpy 298K = -2827.829130

Free Energy 298K = -2827.906432  
Lowest Frequencies = -2.2132 cm-1  
ASQ7\_uu  
C -5.60317 -1.52816 0.16089  
C -5.38576 -0.15009 0.09506  
C -4.09468 0.36859 0.02142  
C -3.00581 -0.50175 0.01270  
C -3.21728 -1.88414 0.07970  
C -4.50628 -2.38788 0.15317  
N -1.67017 -0.07000 -0.05837  
C -1.15607 1.16301 -0.15424  
C -1.67421 2.59443 -0.22824  
O -2.74491 3.13315 -0.22392  
C 0.15499 1.61977 -0.22758  
N 1.43536 1.11975 -0.22700  
C 3.24157 -0.51731 -0.16067  
C 3.63606 -1.78804 -0.58771  
C 4.97830 -2.13607 -0.58349  
C 5.93955 -1.22663 -0.13967  
C 5.54644 0.03952 0.30685  
C 4.19877 0.39003 0.29438  
C -0.20461 3.03182 -0.30519  
O 0.42524 4.05701 -0.39224  
H 2.15828 1.82328 -0.34029  
H -0.95741 -0.80041 -0.06516  
H -2.37088 -2.56524 0.07408  
H -3.96199 1.44362 -0.03063  
H -4.67447 -3.45825 0.20480  
H 2.88038 -2.49083 -0.92171  
H 5.29970 -3.11516 -0.92192  
H 3.92791 1.36698 0.68366  
C 1.78177 -0.20875 -0.19312  
O 0.93680 -1.09379 -0.20414  
Cl -7.19942 -2.19248 0.24928  
Cl 7.60081 -1.69290 -0.14499  
Cl -6.71387 0.95960 0.10237  
Cl 6.70233 1.18499 0.88813

33  
SCF Energy = -2827.56658271  
Enthalpy OK = -2827.359070  
Enthalpy 298K = -2827.335798  
Free Energy 298K = -2827.412312  
Lowest Frequencies = 28.7594 cm-1  
ASQ7b\_b  
C -1.59888 -2.16331 -0.23150  
C -0.35911 -2.56721 0.25920

C 0.81442 -2.00184 -0.22187  
C 0.78338 -0.99775 -1.21398  
C -0.47424 -0.63446 -1.73259  
C -1.64202 -1.19884 -1.24427  
N 1.90828 -0.40358 -1.74862  
C 2.95448 -0.21256 -0.99910  
C 4.37248 0.14280 -1.40412  
O 4.92411 0.37311 -2.45076  
C 3.36214 -0.13300 0.37011  
N 2.82149 -0.28984 1.63819  
C 0.58286 0.74086 1.36290  
C 0.95179 1.74401 0.46349  
C -0.02732 2.49083 -0.18089  
C -1.37579 2.24751 0.06882  
C -1.74651 1.26927 0.99656  
C -0.76747 0.52574 1.64137  
C 4.75530 0.09683 0.08206  
O 5.76988 0.19186 0.75940  
H 3.47633 -0.62855 2.34005  
H -0.51865 0.12110 -2.51045  
H 1.77127 -2.34155 0.16354  
H -0.32424 -3.32467 1.03653  
H 1.99676 1.94676 0.25634  
H 0.24700 3.26017 -0.89467  
H -1.04814 -0.23571 2.36190  
C 1.56288 -0.08206 2.14598  
O 1.26700 -0.51733 3.25302  
Cl -2.56974 3.18286 -0.77598  
Cl -3.04932 -2.87925 0.41479  
Cl -3.41289 0.95472 1.36176  
Cl -3.16141 -0.66571 -1.90918

33

SCF Energy = -2827.57628057  
Enthalpy 0K = -2827.368620  
Enthalpy 298K = -2827.346047  
Free Energy 298K = -2827.422663  
Lowest Frequencies = -5.7610 cm-1

ASQ7c\_a

C 5.56658 -0.86008 -0.00001  
C 4.44838 -1.69449 -0.00000  
C 3.16771 -1.15908 -0.00000  
C 2.97434 0.23250 -0.00001  
C 4.09906 1.07421 -0.00001  
C 5.37110 0.52016 -0.00001  
N 1.67146 0.69166 -0.00001  
C 1.18710 1.96332 -0.00000

C 1.73013 3.34015 0.00000  
O 2.82716 3.87107 -0.00000  
C -0.15433 2.41470 0.00001  
N -1.41013 1.95322 0.00001  
C -3.12942 0.29713 0.00001  
C -4.11325 1.28965 -0.00001  
C -5.45806 0.93993 -0.00002  
C -5.83349 -0.40318 -0.00001  
C -4.85297 -1.39691 0.00000  
C -3.50706 -1.04445 0.00001  
C 0.28783 3.83192 0.00001  
O -0.25396 4.91385 0.00002  
H 0.90620 0.00468 -0.00000  
H 3.97326 2.15284 -0.00002  
H 2.31164 -1.82707 0.00000  
H 6.24016 1.17060 -0.00002  
H -3.80078 2.32816 -0.00001  
H -6.23217 1.70053 -0.00003  
H -2.73593 -1.80776 0.00002  
C -1.65650 0.63540 0.00001  
O -0.84971 -0.32022 0.00003  
Cl 7.18659 -1.49852 -0.00001  
Cl -7.52681 -0.80490 -0.00002  
Cl 4.62316 -3.42697 0.00001  
Cl -5.28544 -3.08368 0.00001

33

SCF Energy = -2827.57628057  
Enthalpy 0K = -2827.368620  
Enthalpy 298K = -2827.346047  
Free Energy 298K = -2827.422663  
Lowest Frequencies = -5.7602 cm-1

ASQ7c\_dd

C -5.56658 -0.86008 -0.00000  
C -4.44838 -1.69449 0.00000  
C -3.16771 -1.15908 0.00000  
C -2.97434 0.23250 0.00000  
C -4.09906 1.07421 -0.00000  
C -5.37110 0.52016 -0.00000  
N -1.67146 0.69166 0.00000  
C -1.18710 1.96332 0.00000  
C -1.73013 3.34015 0.00000  
O -2.82716 3.87107 0.00000  
C 0.15433 2.41470 0.00000  
N 1.41013 1.95322 0.00000  
C 3.12942 0.29713 0.00000  
C 4.11325 1.28965 -0.00000

C 5.45805 0.93993 -0.00000  
C 5.83349 -0.40318 -0.00000  
C 4.85297 -1.39691 0.00000  
C 3.50706 -1.04445 0.00000  
C -0.28782 3.83192 0.00000  
O 0.25396 4.91385 0.00000  
H -0.90620 0.00468 0.00000  
H -3.97326 2.15284 -0.00000  
H -2.31164 -1.82707 0.00000  
H -6.24016 1.17061 -0.00001  
H 3.80078 2.32816 -0.00000  
H 6.23217 1.70053 -0.00000  
H 2.73593 -1.80776 0.00000  
C 1.65650 0.63540 0.00000  
O 0.84971 -0.32022 0.00000  
Cl -7.18659 -1.49852 -0.00000  
Cl 7.52681 -0.80490 -0.00000  
Cl -4.62316 -3.42697 0.00000  
Cl 5.28544 -3.08368 0.00000

33

SCF Energy = -2827.57576176  
Enthalpy 0K = -2827.368092  
Enthalpy 298K = -2827.344596  
Free Energy 298K = -2827.425388  
Lowest Frequencies = 5.9360 cm<sup>-1</sup>

ASQ7c\_du

C -5.78020 -0.51909 -0.00000  
C -4.77682 -1.48832 0.00000  
C -3.43864 -1.11992 0.00000  
C -3.07001 0.23593 -0.00000  
C -4.07907 1.21345 -0.00001  
C -5.41106 0.82525 -0.00001  
N -1.71968 0.52547 -0.00000  
C -1.07632 1.72496 -0.00000  
C -1.43977 3.15930 -0.00000  
O -2.46065 3.82500 -0.00001  
C 0.31169 2.00125 0.00000  
N 1.49809 1.38229 0.00000  
C 2.98709 -0.48800 -0.00000  
C 3.19466 -1.86866 -0.00001  
C 4.48406 -2.38680 -0.00001  
C 5.58015 -1.52609 -0.00000  
C 5.37747 -0.14360 0.00000  
C 4.08518 0.37254 0.00000  
C 0.05358 3.46388 0.00000  
O 0.72781 4.46814 0.00001

H -1.04805 -0.25330 -0.00001  
H -3.81723 2.26736 -0.00001  
H -2.67414 -1.89104 0.00001  
H -6.19053 1.58076 -0.00001  
H 2.32807 -2.52136 -0.00001  
H 4.65774 -3.45810 -0.00001  
H 3.91452 1.44396 0.00001  
C 1.57258 0.04410 -0.00000  
O 0.64893 -0.79966 -0.00001  
Cl -7.46791 -0.94726 -0.00000  
Cl 7.18294 -2.20502 -0.00000  
Cl -5.17011 -3.18497 0.00001  
Cl 6.72595 0.95657 0.00001

33

SCF Energy = -2827.57550441  
Enthalpy 0K = -2827.367890  
Enthalpy 298K = -2827.345309  
Free Energy 298K = -2827.421883  
Lowest Frequencies = -2.4578 cm<sup>-1</sup>

ASQ7c\_ud

C 5.24632 -1.79439 0.00000  
C 5.20193 -0.39941 0.00004  
C 3.99236 0.28755 0.00001  
C 2.78768 -0.42998 -0.00006  
C 2.83269 -1.83675 -0.00010  
C 4.04611 -2.50339 -0.00007  
N 1.54170 0.16632 -0.00009  
C 1.18909 1.47996 -0.00006  
C 1.87299 2.79192 -0.00005  
O 3.02034 3.20083 -0.00005  
C -0.09762 2.06721 -0.00004  
N -1.39471 1.73631 -0.00003  
C -3.27439 0.26615 -0.00003  
C -4.15025 1.35523 0.00003  
C -5.52399 1.14687 0.00007  
C -6.03694 -0.15006 0.00006  
C -5.16453 -1.24000 -0.00000  
C -3.78931 -1.02900 -0.00004  
C 0.48865 3.43160 -0.00003  
O 0.06116 4.56339 -0.00001  
H 0.71043 -0.43914 -0.00012  
H 1.90350 -2.39960 -0.00016  
H 3.98990 1.37463 0.00004  
H 4.07500 -3.58827 -0.00011  
H -3.73147 2.35566 0.00004  
H -6.21507 1.98360 0.00012



H -3.10162 -1.86821 -0.00009  
C -1.77434 0.45120 -0.00007  
O -1.07007 -0.58300 -0.00014  
Cl 6.75199 -2.66942 0.00005  
Cl -7.76282 -0.37373 0.00011  
Cl 6.67265 0.53078 0.00014  
Cl -5.76946 -2.87322 -0.00002

33

SCF Energy = -2827.57488021  
Enthalpy OK = -2827.367256  
Enthalpy 298K = -2827.343777  
Free Energy 298K = -2827.424325  
Lowest Frequencies = 5.9433 cm<sup>-1</sup>

ASQ7c\_uu

C -5.53179 -1.53209 0.02312  
C -5.31886 -0.15268 0.02382  
C -4.03524 0.38313 0.00630  
C -2.92620 -0.47495 -0.01283  
C -3.14142 -1.86607 -0.01393  
C -4.42638 -2.38125 0.00411  
N -1.61745 -0.03443 -0.02970  
C -1.10717 1.22674 -0.03340  
C -1.62723 2.61161 -0.03335  
O -2.71676 3.15614 -0.03140  
C 0.24124 1.65338 -0.03740  
N 1.48849 1.16666 -0.03501  
C 3.17130 -0.53062 -0.03961  
C 3.52816 -1.87999 -0.07354  
C 4.86593 -2.25526 -0.05529  
C 5.86145 -1.28162 -0.00104  
C 5.50938 0.07010 0.03383  
C 4.16894 0.44314 0.01352  
C -0.17540 3.07920 -0.03550  
O 0.38537 4.15080 -0.03565  
H -0.86607 -0.73617 -0.05003  
H -2.28711 -2.53703 -0.02867  
H -3.90120 1.46197 0.00539  
H -4.58627 -3.45475 0.00349  
H 2.73801 -2.62223 -0.11429  
H 5.15545 -3.30086 -0.08177  
H 3.88241 1.48928 0.03906  
C 1.70744 -0.15471 -0.05833  
O 0.88115 -1.09401 -0.09609  
Cl -7.13249 -2.21836 0.04436  
Cl 7.52772 -1.78363 0.02254  
Cl -6.66695 0.94740 0.04559

Cl 6.72964 1.30885 0.10645

34

SCF Energy = -1908.95026673  
Enthalpy OK = -1908.709443  
Enthalpy 298K = -1908.688099  
Free Energy 298K = -1908.762660  
Lowest Frequencies = 16.1585 cm<sup>-1</sup>

ASQ8\_a

C 5.58488 -1.38575 0.07086  
C 4.49397 -2.24952 0.05251  
C 3.20922 -1.72242 0.02329  
C 3.00917 -0.33714 0.01283  
C 4.10935 0.52299 0.03280  
C 5.39592 -0.00775 0.06133  
N 1.67352 0.10660 -0.01500  
C 1.16724 1.34422 -0.05075  
C 1.68929 2.77567 -0.07949  
O 2.76176 3.31281 -0.07817  
C -0.14390 1.81094 -0.07643  
N -1.42615 1.31751 -0.06564  
C -3.24345 -0.30475 -0.01474  
C -4.18816 0.59351 0.49204  
C -5.53564 0.25105 0.52727  
C -5.93179 -0.99581 0.04926  
C -5.00288 -1.90785 -0.44885  
C -3.65866 -1.55923 -0.47139  
C 0.22173 3.22131 -0.10461  
O -0.40416 4.25367 -0.13432  
H -2.14731 2.02846 -0.13112  
H 0.95425 -0.61735 -0.03495  
H 3.97494 1.59857 0.02404  
H 2.35364 -2.39276 0.00858  
H 4.64825 -3.32321 0.06049  
H 6.25382 0.65618 0.07587  
H -3.89065 1.55506 0.90128  
H -6.27295 0.93773 0.92848  
H -5.33431 -2.87535 -0.81007  
H -2.91311 -2.25368 -0.84479  
C -1.78332 -0.00990 -0.07456  
O -0.94358 -0.89813 -0.14206  
Cl 7.19971 -2.03787 0.10459  
Cl -7.61313 -1.42488 0.08451

33

SCF Energy = -1908.43323758  
Enthalpy OK = -1908.206495

Enthalpy 298K = -1908.185655  
Free Energy 298K = -1908.256485  
Lowest Frequencies = 32.1992 cm<sup>-1</sup>

C 3.12088 -1.71457 -0.00000  
C 2.92248 -0.32181 -0.00000

ASQ8b\_b

C -2.24315 -1.97697 -0.68640  
C -1.04876 -2.51637 -0.22486  
C 0.15578 -1.91910 -0.58671  
C 0.18807 -0.76971 -1.40503  
C -1.04207 -0.28284 -1.89246  
C -2.24670 -0.86876 -1.53208  
N 1.35447 -0.14407 -1.80708  
C 2.38184 -0.11623 -1.01220  
C 3.82142 0.24996 -1.32038  
O 4.40837 0.63527 -2.30107  
C 2.75882 -0.28374 0.36072  
N 2.18064 -0.63098 1.57395  
C 0.00163 0.54280 1.44052  
C 0.44828 1.66944 0.74554  
C -0.46646 2.56850 0.20282  
C -1.82543 2.32589 0.36174  
C -2.29262 1.22664 1.07671  
C -1.37048 0.34355 1.62228  
C 4.16382 -0.06085 0.14255  
O 5.16583 -0.11855 0.84506  
H 2.80237 -1.11476 2.21831  
H -1.02375 0.58948 -2.53968  
H 1.09079 -2.34830 -0.23744  
H -1.05891 -3.38639 0.42502  
H -3.18884 -0.45952 -1.88562  
H 1.50988 1.85302 0.61738  
H -0.12702 3.43571 -0.35324  
H -3.35921 1.05450 1.18011  
H -1.70230 -0.52691 2.17960  
C 0.92187 -0.44529 2.09078  
O 0.58075 -1.04474 3.10520  
Cl -2.98037 3.42161 -0.36561  
Cl -3.77042 -2.69037 -0.19130

33

SCF Energy = -1908.44458648  
Enthalpy 0K = -1908.217566  
Enthalpy 298K = -1908.196550  
Free Energy 298K = -1908.270744  
Lowest Frequencies = 8.0949 cm<sup>-1</sup>

ASQ8c\_a

C 5.50061 -1.40281 -0.00000  
C 4.40032 -2.25427 -0.00000

## References:

1. Brynn Hibbert, D.; Thordarson, P., *Chemical Communications* 2016, **52** (87), 12792-12805.
2. <http://supramolecular.org>.
3. Jowett, L. A.; Gale, P. A., *Supramolecular Chemistry*, 2019, **31** (5), 297-312.
4. Gaussian 09, Revision E.01, M. J. Frisch, G. W. Trucks, H. B. Schlegel, G. E. Scuseria, M. A. Robb, J. R. Cheeseman, G. Scalmani, V. Barone, B. Mennucci, G. A. Petersson, H. Nakatsuji, M. Caricato, X. Li, H. P. Hratchian, A. F. Izmaylov, J. Bloino, G. Zheng, J. L. Sonnenberg, M. Hada, M. Ehara, K. Toyota, R. Fukuda, J. Hasegawa, M. Ishida, T. Nakajima, Y. Honda, O. Kitao, H. Nakai, T. Vreven, J. A. Jr. Montgomery, J. E. Peralta, F. Ogliaro, M. Bearpark, J. J. Heyd, E. Brothers, K. N. Kudin, V. N. Staroverov, R. Kobayashi, J. Normand, K. Raghavachari, A. Rendell, J. C. Burant, S. S. Iyengar, J. Tomasi, M. Cossi, N. Rega, J. M. Millam, M. Klene, J. E. Knox, J. B. Cross, V. Bakken, C. Adamo, J. Jaramillo, R. Gomperts, R. E. Stratmann, O. Yazyev, A. J. Austin, R. Cammi, C. Pomelli, J. W. Ochterski, R. L. Martin, K. Morokuma, V. G. Zakrzewski, G. A. Voth, P. Salvador, J. J. Dannenberg, S. Dapprich, A. D. Daniels, Ö Farkas, J. B. Foresman, J. V. Ortiz, J. Cioslowski, D. J. Fox, Gaussian, Inc., Wallingford CT, 2009.
5. F. Neese, *Wiley Interdiscip. Rev.: Comput. Mol. Sci.*, 2017, **8**, e1327.
6. Y., Zhao, D. G. Truhlar, *Theor. Chem. Account*, 2008, **120**, 215.
7. (a) R. Ditchfield, W. J. Hehre and J. A. Pople, *J. Chem. Phys.* 1971, **54**, 724. (b) P. C. Hariharan and J. A. Pople, *Theoret. Chim. Acta*, 1973, **28**, 213.
8. A. Bergner, M. Dolg, W. Kuechle, H. Stoll, H. Preuss, *Mol. Phys.*, 1993, **80**, 1431.
9. A. Höllwarth, M. Böhme, S. Dapprich, A. W. Ehlers, A. Gobbi, V. Jonas, K. F. Köhler, R. Stegmann, A. Veldkamp, G. Frenking, *Chem. Phys. Lett.*, 1993, **208**, 237.
10. J. Tomasi, B. Mennucci, R. Cammi, *Chem. Rev.*, 2005, **105**, 2999.
11. A. V. Marenich, C. J. Cramer and D. G. Truhlar, *J. Phys. Chem. B*, 2009, **113**, 6378.
12. (a) C. Riplinger, P. Pinski, U. Becker, E. F. Valeev, F. Neese, *J. Chem. Phys.*, 2016, **144**, 024109. (b) Y. Guo, C. Riplinger, U. Becker, D. G. Liakos, Y. Minenkov, L. Cavallo, F. Neese, *J. Chem. Phys.*, 2018, **148**, 5.
13. F. Neese, E. F. Valeev, *J. Chem. Theory Comput.*, 2011, **7**, 33.
14. F. Weigend, R. Ahlrichs, *Phys. Chem. Chem. Phys.*, 2005, **7**, 3297.
15. (a) F. Neese, F. Wennmoths, A. Hansen, U. Becker, *Chem. Phys.*, 2009, **356**, 98. (b) G. L. Stoychev, A. Auer, F. Neese, *J. Chem. Theory Comput.*, 2017, **13**, 554.
16. J. Ho, V. E. Zwicker, K. K. Y. Yuen, K. A. Jolliffe, *J. Org. Chem.*, 2017, **82**, 10732.
17. C. P. Kelly, C. J. Cramer, D. G. Truhlar, *J. Phys. Chem. B*, 2007, **111**, 408.
18. (a) A. Laio, M. Parrinello, *PNAS*, 2002, **99**, 12562–12566. (b) A. Barducci, G. Bussi, M. Parrinello, *Phys. Rev. Lett.*, 2008, **100**, 020603.
19. D. Hollas, J. Suchan, O. Svoboda, M. Ončák, P. Slavíček, ABIN (version 1.1), <https://github.com/PHOTOX/ABIN>, accessed 14 April 2020
20. G. A. Tribello, M. Bonomi, D. Branduardi, C. Camilloni and G. Bussi, *Comp. Phys. Comm.*, 2014, **185**, 604.
21. (a) C. Bannwarth, E. Caldeweyher, S. Ehlert, A. Hansen, P. Pracht, J. Seibert, S. Spicher, S. Grimme, *WIREs Comput. Mol. Sci.*, 2020, **11**, e01493. (b) S. Grimme, C. Bannwarth, P. Shushkov, *J. Chem. Theory Comput.*, 2017, **13**, 1989.

22. (a) S. Nosé, *Mol. Phys.*, 1984, **52**, 255. (b) W. G. Hoover, *Phys. Rev. A: At., Mol., Opt. Phys.*, 1985, **31**, 1695. (c) G. J. Martyna, M. L. Klein, M. Tuckerman, *J. Chem. Phys.*, 1992, **97**, 2635.
23. P. Pracht, F. Bohle, S. Grimme, *Phys. Chem. Chem. Phys.*, 2020, **22**, 7169.
